# Supplementary material for: Hydrothermal activity generated by impact melt emplacement on the rim of Ritchey crater, Mars
Source: Research Square preprint supplement (doi:10.21203/rs.3.rs-4370272/v1), 2024-06-27
Supplement: Supplementary file 2 [file c83d6c9dff60913894bd82da.xlsx]

## Sheet: sheet1
Table S1 Spectra of region of interest (ROI), ratioed against to a spectral denominator that is a dusty, bland feature (see Table S3).
	frt0001253f					frt0001253f				frt0001253f				frt0001253f				hrl00010d87				frt0000a0b7				frt0000b5c3				frt0000b5c3				frt0000b5c3				frt0000b5c3				hrl00010d87				frt00017d66
	ROI name	a (mean of 3 shapes, shown in Fig 2G)			ROI name	a1			ROI name	a2			ROI name	a3			ROI name	b			ROI name	c			ROI name	d (mean of d1+d2+d3)			ROI name	d1			ROI name	d2			ROI name	d3			ROI name	e			ROI name	f (mean of f1+f2)			ROI name
	pixel amount of ROI (Region of interest)	1331			pixel amount of ROI (Region of interest)	351			pixel amount of ROI (Region of interest)	467			pixel amount of ROI (Region of interest)	513			pixel amount of ROI (Region of interest)	45			pixel amount of ROI (Region of interest)	6424			pixel amount of ROI (Region of interest)	570			pixel amount of ROI (Region of interest)	251			pixel amount of ROI (Region of interest)	231			pixel amount of ROI (Region of interest)	81			pixel amount of ROI (Region of interest)	98			pixel amount of ROI (Region of interest)	87			pixel amount of ROI (Region of interest)
	geological unit	sheet unit			geological unit	sheet unit			geological unit	sheet unit			geological unit	sheet unit			geological unit	altered basement with vein filling			geological unit	ridged unit			geological unit	altered basement			geological unit	altered basement			geological unit	altered basement			geological unit	altered basement with ridges			geological unit	mega breccia			geological unit	slope below the sheet unit			geological unit
	mineral	orthopyroxene-glass mixture			mineral	orthopyroxene-glass mixture			mineral	orthopyroxene-glass mixture			mineral	orthopyroxene-glass mixture			mineral	saponite, Mg carbonate			mineral	saponite, Mg carbonate			mineral	saponite, Mg carbonate			mineral	saponite, Mg carbonate			mineral	saponite, Mg carbonate			mineral	saponite, Mg carbonate			mineral	basalt glass?			mineral	serpentine			mineral
		wavelength	reflectance			wavelength	reflectance			wavelength	reflectance			wavelength	reflectance			wavelength	reflectance			wavelength	reflectance			wavelength	reflectance			wavelength	reflectance			wavelength	reflectance			wavelength	reflectance			wavelength	reflectance			wavelength	reflectance
		0.43613	1.01698			0.43613	1.02267			0.43613	1.02095			0.43613	1.00948			0.43613	0.941671			0.43613	0.964563			0.43613	1.32177			0.43613	1.24286			0.43613	1.34319			0.43613	1.51014			0.43613	1.03809			0.43613	1.09432
		0.44263	1.01763			0.44263	1.02335			0.44263	1.02077			0.44263	1.01085			0.44263	0.941075			0.44263	0.971381			0.44263	1.32427			0.44263	1.24198			0.44263	1.33239			0.44263	1.48823			0.44263	1.03735			0.44263	1.09312
		0.44914	1.01845			0.44914	1.02429			0.44914	1.02109			0.44914	1.01205			0.44914	0.941767			0.44914	0.968116			0.44914	1.32737			0.44914	1.25364			0.44914	1.34418			0.44914	1.50976			0.44914	1.03716			0.44914	1.09306
		0.45564	1.01934			0.45564	1.02542			0.45564	1.02072			0.45564	1.01394			0.45564	0.940437			0.45564	0.968854			0.45564	1.33146			0.45564	1.25941			0.45564	1.34543			0.45564	1.51597			0.45564	1.03653			0.45564	1.09117
		0.46215	1.02067			0.46215	1.02687			0.46215	1.02117			0.46215	1.01598			0.46215	0.941875			0.46215	0.963201			0.46215	1.33764			0.46215	1.26267			0.46215	1.35577			0.46215	1.53154			0.46215	1.03617			0.46215	1.09138
		0.46865	1.02154			0.46865	1.0277			0.46865	1.02148			0.46865	1.01738			0.46865	0.943237			0.46865	0.966777			0.46865	1.34351			0.46865	1.26894			0.46865	1.356			0.46865	1.53592			0.46865	1.03557			0.46865	1.09152
		0.47516	1.02243			0.47516	1.02875			0.47516	1.02194			0.47516	1.01856			0.47516	0.943575			0.47516	0.968304			0.47516	1.34965			0.47516	1.26958			0.47516	1.35967			0.47516	1.53985			0.47516	1.0358			0.47516	1.09117
		0.48167	1.02266			0.48167	1.02906			0.48167	1.02177			0.48167	1.01908			0.48167	0.94477			0.48167	0.965344			0.48167	1.35715			0.48167	1.27665			0.48167	1.37312			0.48167	1.55979			0.48167	1.03555			0.48167	1.09043
		0.48817	1.02373			0.48817	1.03007			0.48817	1.02256			0.48817	1.02046			0.48817	0.945772			0.48817	0.965118			0.48817	1.36444			0.48817	1.28271			0.48817	1.37692			0.48817	1.56737			0.48817	1.03484			0.48817	1.08975
		0.49468	1.02416			0.49468	1.03064			0.49468	1.02285			0.49468	1.02093			0.49468	0.946802			0.49468	0.965842			0.49468	1.37349			0.49468	1.29581			0.49468	1.39011			0.49468	1.59201			0.49468	1.03501			0.49468	1.08945
		0.50119	1.02503			0.50119	1.03166			0.50119	1.02321			0.50119	1.02216			0.50119	0.947096			0.50119	0.966955			0.50119	1.38354			0.50119	1.29445			0.50119	1.39411			0.50119	1.60139			0.50119	1.03506			0.50119	1.08836
		0.5077	1.02596			0.5077	1.03273			0.5077	1.02376			0.5077	1.02332			0.5077	0.948657			0.5077	0.968737			0.5077	1.39611			0.5077	1.30342			0.5077	1.40658			0.5077	1.61526			0.5077	1.03511			0.5077	1.08879
		0.51421	1.027			0.51421	1.03363			0.51421	1.02454			0.51421	1.02471			0.51421	0.949874			0.51421	0.96733			0.51421	1.40632			0.51421	1.31672			0.51421	1.42419			0.51421	1.63939			0.51421	1.03566			0.51421	1.0907
		0.52072	1.02828			0.52072	1.03499			0.52072	1.02559			0.52072	1.02614			0.52072	0.952428			0.52072	0.966369			0.52072	1.42053			0.52072	1.33131			0.52072	1.44307			0.52072	1.66452			0.52072	1.03685			0.52072	1.09277
		0.52723	1.02927			0.52723	1.03588			0.52723	1.02616			0.52723	1.02758			0.52723	0.953737			0.52723	0.968082			0.52723	1.43575			0.52723	1.32992			0.52723	1.44906			0.52723	1.67259			0.52723	1.03739			0.52723	1.09349
		0.53374	1.03003			0.53374	1.03653			0.53374	1.02666			0.53374	1.02866			0.53374	0.956123			0.53374	0.966461			0.53374	1.44762			0.53374	1.3516			0.53374	1.46849			0.53374	1.70561			0.53374	1.03785			0.53374	1.09481
		0.54025	1.03093			0.54025	1.03727			0.54025	1.0274			0.54025	1.02981			0.54025	0.958989			0.54025	0.967009			0.54025	1.4597			0.54025	1.3648			0.54025	1.48582			0.54025	1.72771			0.54025	1.03864			0.54025	1.09642
		0.54676	1.03223			0.54676	1.03857			0.54676	1.02847			0.54676	1.03132			0.54676	0.960507			0.54676	0.965723			0.54676	1.47341			0.54676	1.3635			0.54676	1.48658			0.54676	1.72867			0.54676	1.0395			0.54676	1.09556
		0.55327	1.03262			0.55327	1.03879			0.55327	1.02847			0.55327	1.03218			0.55327	0.96298			0.55327	0.96886			0.55327	1.48169			0.55327	1.37998			0.55327	1.50448			0.55327	1.75847			0.55327	1.04052			0.55327	1.09544
		0.55978	1.03344			0.55978	1.03958			0.55978	1.02885			0.55978	1.03343			0.55978	0.965618			0.55978	0.970029			0.55978	1.48847			0.55978	1.39132			0.55978	1.51649			0.55978	1.76645			0.55978	1.04157			0.55978	1.09699
		0.56629	1.03409			0.56629	1.0401			0.56629	1.02909			0.56629	1.03453			0.56629	0.968059			0.56629	0.971627			0.56629	1.49865			0.56629	1.38991			0.56629	1.51141			0.56629	1.75212			0.56629	1.0423			0.56629	1.09678
		0.57281	1.03483			0.57281	1.04064			0.57281	1.02925			0.57281	1.03592			0.57281	0.970371			0.57281	0.972338			0.57281	1.50764			0.57281	1.39882			0.57281	1.51785			0.57281	1.76672			0.57281	1.04304			0.57281	1.09764
		0.57932	1.03561			0.57932	1.04154			0.57932	1.02918			0.57932	1.03739			0.57932	0.971978			0.57932	0.970881			0.57932	1.51435			0.57932	1.41434			0.57932	1.53479			0.57932	1.78784			0.57932	1.04311			0.57932	1.0986
		0.58583	1.03666			0.58583	1.04256			0.58583	1.02964			0.58583	1.03901			0.58583	0.97334			0.58583	0.970455			0.58583	1.52472			0.58583	1.42565			0.58583	1.54796			0.58583	1.80562			0.58583	1.04324			0.58583	1.09923
		0.59235	1.03761			0.59235	1.04351			0.59235	1.02997			0.59235	1.04053			0.59235	0.97456			0.59235	0.970557			0.59235	1.53432			0.59235	1.42623			0.59235	1.54621			0.59235	1.80681			0.59235	1.04369			0.59235	1.09894
		0.59886	1.03904			0.59886	1.04493			0.59886	1.03075			0.59886	1.04254			0.59886	0.975624			0.59886	0.971749			0.59886	1.54214			0.59886	1.43757			0.59886	1.56134			0.59886	1.82273			0.59886	1.04441			0.59886	1.1007
		0.60538	1.03997			0.60538	1.04602			0.60538	1.03119			0.60538	1.04381			0.60538	0.976702			0.60538	0.971445			0.60538	1.54959			0.60538	1.44111			0.60538	1.56471			0.60538	1.83555			0.60538	1.04498			0.60538	1.10045
		0.61189	1.04071			0.61189	1.04666			0.61189	1.03149			0.61189	1.04502			0.61189	0.979024			0.61189	0.971372			0.61189	1.55838			0.61189	1.44959			0.61189	1.57369			0.61189	1.83952			0.61189	1.04587			0.61189	1.10107
		0.61841	1.0412			0.61841	1.04726			0.61841	1.03168			0.61841	1.04573			0.61841	0.980608			0.61841	0.971164			0.61841	1.56589			0.61841	1.45595			0.61841	1.58779			0.61841	1.85679			0.61841	1.04668			0.61841	1.10161
		0.62492	1.04322			0.62492	1.04935			0.62492	1.03259			0.62492	1.04871			0.62492	0.98617			0.62492	0.972562			0.62492	1.60014			0.62492	1.46152			0.62492	1.5961			0.62492	1.86038			0.62492	1.05032			0.62492	1.10668
		0.63144	1.04506			0.63144	1.05127			0.63144	1.03342			0.63144	1.05141			0.63144	0.992068			0.63144	0.976739			0.63144	1.63575			0.63144	1.46067			0.63144	1.60833			0.63144	1.87728			0.63144	1.05403			0.63144	1.11166
		0.70968	1.04689			0.70968	1.05298			0.70968	1.03427			0.70968	1.0542			0.70968	0.997726			0.70968	0.976064			0.70968	1.67055			0.70968	1.57526			0.70968	1.756			0.70968	2.06277			0.70968	1.05782			0.70968	1.11773
		0.7162	1.04862			0.7162	1.05462			0.7162	1.03508			0.7162	1.05684			0.7162	1.00282			0.7162	0.973885			0.7162	1.70582			0.7162	1.58727			0.7162	1.77225			0.7162	2.08259			0.7162	1.06166			0.7162	1.1235
		0.72272	1.05034			0.72272	1.0562			0.72272	1.03583			0.72272	1.05955			0.72272	1.00827			0.72272	0.975781			0.72272	1.74176			0.72272	1.59062			0.72272	1.78163			0.72272	2.0943			0.72272	1.0653			0.72272	1.12992
		0.72925	1.05085			0.72925	1.05659			0.72925	1.03623			0.72925	1.06024			0.72925	1.00961			0.72925	0.977079			0.72925	1.75169			0.72925	1.59846			0.72925	1.79023			0.72925	2.1064			0.72925	1.06594			0.72925	1.13126
		0.73577	1.05088			0.73577	1.05645			0.73577	1.03613			0.73577	1.06049			0.73577	1.01089			0.73577	0.975037			0.73577	1.75885			0.73577	1.60417			0.73577	1.80303			0.73577	2.12509			0.73577	1.06643			0.73577	1.1335
		0.7423	1.05082			0.7423	1.0564			0.7423	1.03594			0.7423	1.06056			0.7423	1.01256			0.7423	0.977373			0.7423	1.76644			0.7423	1.61233			0.7423	1.81282			0.7423	2.13033			0.7423	1.06722			0.7423	1.13509
		0.74882	1.05087			0.74882	1.05652			0.74882	1.03571			0.74882	1.0608			0.74882	1.01406			0.74882	0.976088			0.74882	1.77398			0.74882	1.61149			0.74882	1.81472			0.74882	2.13493			0.74882	1.06802			0.74882	1.13716
		0.75535	1.05087			0.75535	1.05655			0.75535	1.03541			0.75535	1.06105			0.75535	1.01533			0.75535	0.97682			0.75535	1.78046			0.75535	1.61962			0.75535	1.82294			0.75535	2.14986			0.75535	1.06866			0.75535	1.13893
		0.76187	1.05052			0.76187	1.05622			0.76187	1.03484			0.76187	1.06089			0.76187	1.01668			0.76187	0.976466			0.76187	1.78528			0.76187	1.62556			0.76187	1.83258			0.76187	2.16347			0.76187	1.06968			0.76187	1.14205
		0.7684	1.0504			0.7684	1.05614			0.7684	1.03449			0.7684	1.06096			0.7684	1.01745			0.7684	0.976466			0.7684	1.79184			0.7684	1.63359			0.7684	1.83523			0.7684	2.16726			0.7684	1.07058			0.7684	1.14398
		0.77492	1.04994			0.77492	1.05552			0.77492	1.03392			0.77492	1.06071			0.77492	1.01773			0.77492	0.975515			0.77492	1.79563			0.77492	1.6332			0.77492	1.83647			0.77492	2.16563			0.77492	1.07072			0.77492	1.14596
		0.78145	1.04948			0.78145	1.05486			0.78145	1.03337			0.78145	1.06047			0.78145	1.01777			0.78145	0.977107			0.78145	1.79772			0.78145	1.64277			0.78145	1.84442			0.78145	2.18152			0.78145	1.07086			0.78145	1.14803
		0.78798	1.04893			0.78798	1.05425			0.78798	1.03274			0.78798	1.06005			0.78798	1.01781			0.78798	0.976029			0.78798	1.79977			0.78798	1.64095			0.78798	1.83897			0.78798	2.16996			0.78798	1.07101			0.78798	1.15075
		0.79451	1.04842			0.79451	1.05369			0.79451	1.03199			0.79451	1.05977			0.79451	1.01766			0.79451	0.975575			0.79451	1.80146			0.79451	1.64104			0.79451	1.83721			0.79451	2.17578			0.79451	1.07072			0.79451	1.15221
		0.80104	1.04749			0.80104	1.05273			0.80104	1.0309			0.80104	1.05902			0.80104	1.01748			0.80104	0.97438			0.80104	1.80208			0.80104	1.64711			0.80104	1.84217			0.80104	2.17692			0.80104	1.07102			0.80104	1.15461
		0.80756	1.04724			0.80756	1.05256			0.80756	1.03042			0.80756	1.05891			0.80756	1.01707			0.80756	0.974988			0.80756	1.80239			0.80756	1.64695			0.80756	1.83821			0.80756	2.17728			0.80756	1.07096			0.80756	1.1565
		0.81409	1.04663			0.81409	1.05195			0.81409	1.02977			0.81409	1.05833			0.81409	1.01676			0.81409	0.976043			0.81409	1.8029			0.81409	1.65429			0.81409	1.84099			0.81409	2.17784			0.81409	1.0711			0.81409	1.15884
		0.82062	1.04617			0.82062	1.05147			0.82062	1.02921			0.82062	1.058			0.82062	1.01619			0.82062	0.974029			0.82062	1.80148			0.82062	1.64993			0.82062	1.83276			0.82062	2.17113			0.82062	1.07098			0.82062	1.16003
		0.82715	1.04547			0.82715	1.05061			0.82715	1.0287			0.82715	1.05721			0.82715	1.01605			0.82715	0.973303			0.82715	1.80033			0.82715	1.65308			0.82715	1.83222			0.82715	2.17132			0.82715	1.07134			0.82715	1.16102
		0.83368	1.04509			0.83368	1.05013			0.83368	1.0283			0.83368	1.05694			0.83368	1.01552			0.83368	0.971639			0.83368	1.79857			0.83368	1.64915			0.83368	1.82693			0.83368	2.16509			0.83368	1.07097			0.83368	1.16209
		0.84022	1.04422			0.84022	1.04907			0.84022	1.02741			0.84022	1.0562			0.84022	1.01455			0.84022	0.971813			0.84022	1.7955			0.84022	1.65271			0.84022	1.82419			0.84022	2.16042			0.84022	1.0705			0.84022	1.16301
		0.84675	1.04343			0.84675	1.04817			0.84675	1.02672			0.84675	1.05539			0.84675	1.01404			0.84675	0.971453			0.84675	1.79351			0.84675	1.65458			0.84675	1.82625			0.84675	2.15841			0.84675	1.07032			0.84675	1.1643
		0.85328	1.04291			0.85328	1.04761			0.85328	1.02623			0.85328	1.05487			0.85328	1.01443			0.85328	0.969874			0.85328	1.79279			0.85328	1.64506			0.85328	1.80945			0.85328	2.14669			0.85328	1.07021			0.85328	1.16489
		0.85981	1.04253			0.85981	1.04728			0.85981	1.02571			0.85981	1.05459			0.85981	1.0138			0.85981	0.969111			0.85981	1.79143			0.85981	1.65213			0.85981	1.8185			0.85981	2.14442			0.85981	1.06992			0.85981	1.16683
		0.86634	1.04223			0.86634	1.0469			0.86634	1.02551			0.86634	1.05427			0.86634	1.0138			0.86634	0.971216			0.86634	1.78902			0.86634	1.65363			0.86634	1.81848			0.86634	2.15079			0.86634	1.06949			0.86634	1.1679
		0.87288	1.0422			0.87288	1.04703			0.87288	1.02533			0.87288	1.05425			0.87288	1.01409			0.87288	0.969318			0.87288	1.78953			0.87288	1.65236			0.87288	1.81344			0.87288	2.14514			0.87288	1.06941			0.87288	1.17006
		0.87941	1.04184			0.87941	1.04671			0.87941	1.0249			0.87941	1.05392			0.87941	1.01488			0.87941	0.970389			0.87941	1.78976			0.87941	1.65002			0.87941	1.81015			0.87941	2.13504			0.87941	1.06942			0.87941	1.17141
		0.88595	1.04127			0.88595	1.04606			0.88595	1.0244			0.88595	1.05335			0.88595	1.01442			0.88595	0.968863			0.88595	1.78895			0.88595	1.65055			0.88595	1.81187			0.88595	2.14032			0.88595	1.06921			0.88595	1.17357
		0.89248	1.04096			0.89248	1.04567			0.89248	1.02414			0.89248	1.05305			0.89248	1.01462			0.89248	0.970192			0.89248	1.78903			0.89248	1.65762			0.89248	1.81469			0.89248	2.14671			0.89248	1.0688			0.89248	1.17528
		0.89902	1.04055			0.89902	1.04531			0.89902	1.02367			0.89902	1.05266			0.89902	1.01476			0.89902	0.969766			0.89902	1.79042			0.89902	1.65474			0.89902	1.81151			0.89902	2.13927			0.89902	1.06854			0.89902	1.17676
		0.90555	1.04009			0.90555	1.04476			0.90555	1.02327			0.90555	1.05221			0.90555	1.0155			0.90555	0.969509			0.90555	1.7906			0.90555	1.6577			0.90555	1.81157			0.90555	2.137			0.90555	1.06879			0.90555	1.1765
		0.91209	1.04044			0.91209	1.04518			0.91209	1.02346			0.91209	1.05265			0.91209	1.01505			0.91209	0.967883			0.91209	1.78974			0.91209	1.66025			0.91209	1.81485			0.91209	2.13871			0.91209	1.06794			0.91209	1.17656
		0.91862	1.04035			0.91862	1.04524			0.91862	1.02314			0.91862	1.05267			0.91862	1.0153			0.91862	0.968948			0.91862	1.78814			0.91862	1.6542			0.91862	1.81007			0.91862	2.14044			0.91862	1.06832			0.91862	1.17669
		0.92516	1.04015			0.92516	1.04513			0.92516	1.02283			0.92516	1.05249			0.92516	1.01589			0.92516	0.96869			0.92516	1.78792			0.92516	1.65569			0.92516	1.8099			0.92516	2.13644			0.92516	1.06824			0.92516	1.17672
		0.9317	1.04027			0.9317	1.04536			0.9317	1.02292			0.9317	1.05258			0.9317	1.01565			0.9317	0.9691			0.9317	1.78792			0.9317	1.64875			0.9317	1.8017			0.9317	2.13053			0.9317	1.0682			0.9317	1.17712
		0.93824	1.04042			0.93824	1.04553			0.93824	1.02293			0.93824	1.05286			0.93824	1.01611			0.93824	0.968031			0.93824	1.78765			0.93824	1.65863			0.93824	1.80917			0.93824	2.1335			0.93824	1.06848			0.93824	1.17855
		0.94477	1.04045			0.94477	1.04551			0.94477	1.02275			0.94477	1.05309			0.94477	1.0163			0.94477	0.967911			0.94477	1.78869			0.94477	1.66261			0.94477	1.81381			0.94477	2.13418			0.94477	1.06882			0.94477	1.17913
		0.95131	1.04084			0.95131	1.04593			0.95131	1.02305			0.95131	1.05354			0.95131	1.01747			0.95131	0.96762			0.95131	1.79259			0.95131	1.65593			0.95131	1.8058			0.95131	2.13819			0.95131	1.06849			0.95131	1.17938
		0.95785	1.04104			0.95785	1.04634			0.95785	1.02293			0.95785	1.05391			0.95785	1.0185			0.95785	0.967626			0.95785	1.79363			0.95785	1.65927			0.95785	1.81744			0.95785	2.13995			0.95785	1.06918			0.95785	1.1803
		0.96439	1.04107			0.96439	1.04636			0.96439	1.02282			0.96439	1.05407			0.96439	1.01941			0.96439	0.968354			0.96439	1.79362			0.96439	1.66813			0.96439	1.82293			0.96439	2.14543			0.96439	1.07011			0.96439	1.1792
		0.97093	1.04108			0.97093	1.0464			0.97093	1.02278			0.97093	1.05411			0.97093	1.02002			0.97093	0.968035			0.97093	1.79404			0.97093	1.66247			0.97093	1.81615			0.97093	2.13769			0.97093	1.06951			0.97093	1.17832
		0.97747	1.04116			0.97747	1.04657			0.97747	1.02282			0.97747	1.05414			0.97747	1.02164			0.97747	0.968537			0.97747	1.79692			0.97747	1.66051			0.97747	1.81481			0.97747	2.13716			0.97747	1.06974			0.97747	1.17644
		0.98401	1.04117			0.98401	1.04654			0.98401	1.02264			0.98401	1.05437			0.98401	1.0227			0.98401	0.965697			0.98401	1.79749			0.98401	1.65329			0.98401	1.81465			0.98401	2.1353			0.98401	1.06951			0.98401	1.17721
		0.99055	1.04137			0.99055	1.04672			0.99055	1.02274			0.99055	1.05466			0.99055	1.02287			0.99055	0.968839			0.99055	1.79551			0.99055	1.66659			0.99055	1.83725			0.99055	2.16045			0.99055	1.06936			0.99055	1.17439
		0.9971	1.04182			0.9971	1.04723			0.9971	1.02317			0.9971	1.0551			0.9971	1.02413			0.9971	0.96371			0.9971	1.7933			0.9971	1.66205			0.9971	1.83125			0.9971	2.15979			0.9971	1.06811			0.9971	1.17421
		1.00364	1.04238			1.00364	1.04834			1.00364	1.02255			1.00364	1.05636			1.00364	1.02383			1.00364	0.96414			1.00364	1.80281			1.00364	1.6489			1.00364	1.80819			1.00364	2.13348			1.00364	1.06834			1.00364	1.17124
		1.01018	1.04186			1.01018	1.04815			1.01018	1.02113			1.01018	1.05642			1.01018	1.02338			1.01018	0.960686			1.01018	1.80823			1.01018	1.64476			1.01018	1.80723			1.01018	2.13034			1.01018	1.06968			1.01018	1.16933
		1.0472	1.04247			1.0472	1.04905			1.0472	1.02126			1.0472	1.05726			1.0472	1.02154			1.0472	0.975618			1.0472	1.81396			1.0472	1.70526			1.0472	1.85671			1.0472	2.18531			1.0472	1.07102			1.0472	1.1656
		1.05375	1.04336			1.05375	1.05017			1.05375	1.02176			1.05375	1.05836			1.05375	1.02214			1.05375	0.973161			1.05375	1.82307			1.05375	1.70141			1.05375	1.85644			1.05375	2.18698			1.05375	1.07215			1.05375	1.16727
		1.0603	1.0445			1.0603	1.05161			1.0603	1.02213			1.0603	1.06001			1.0603	1.02292			1.0603	0.974976			1.0603	1.83384			1.0603	1.69799			1.0603	1.85231			1.0603	2.18798			1.0603	1.07401			1.0603	1.16396
		1.06685	1.04537			1.06685	1.05208			1.06685	1.02362			1.06685	1.06059			1.06685	1.02344			1.06685	0.974539			1.06685	1.83408			1.06685	1.70032			1.06685	1.84235			1.06685	2.19447			1.06685	1.07556			1.06685	1.16413
		1.07341	1.04755			1.07341	1.05393			1.07341	1.02617			1.07341	1.06264			1.07341	1.02471			1.07341	0.973464			1.07341	1.83889			1.07341	1.70155			1.07341	1.84861			1.07341	2.21155			1.07341	1.07596			1.07341	1.16511
		1.07996	1.04865			1.07996	1.05491			1.07996	1.02727			1.07996	1.06382			1.07996	1.02699			1.07996	0.974041			1.07996	1.84168			1.07996	1.70563			1.07996	1.84842			1.07996	2.217			1.07996	1.07671			1.07996	1.16542
		1.08651	1.04968			1.08651	1.0558			1.08651	1.02816			1.08651	1.06507			1.08651	1.02786			1.08651	0.976343			1.08651	1.84679			1.08651	1.72125			1.08651	1.87816			1.08651	2.23099			1.08651	1.07686			1.08651	1.16323
		1.09307	1.05052			1.09307	1.05635			1.09307	1.02902			1.09307	1.0661			1.09307	1.0289			1.09307	0.974401			1.09307	1.85455			1.09307	1.70769			1.09307	1.86617			1.09307	2.21532			1.09307	1.07663			1.09307	1.16647
		1.09962	1.05147			1.09962	1.05742			1.09962	1.02982			1.09962	1.06711			1.09962	1.03114			1.09962	0.97671			1.09962	1.86166			1.09962	1.7117			1.09962	1.87758			1.09962	2.23558			1.09962	1.07668			1.09962	1.16874
		1.10617	1.05208			1.10617	1.05826			1.10617	1.0301			1.10617	1.06785			1.10617	1.03157			1.10617	0.976241			1.10617	1.86618			1.10617	1.72749			1.10617	1.89767			1.10617	2.26009			1.10617	1.07539			1.10617	1.17162
		1.11273	1.05324			1.11273	1.05948			1.11273	1.03103			1.11273	1.06919			1.11273	1.0316			1.11273	0.97663			1.11273	1.87399			1.11273	1.72866			1.11273	1.89712			1.11273	2.25268			1.11273	1.07566			1.11273	1.17306
		1.11928	1.04998			1.11928	1.05614			1.11928	1.02783			1.11928	1.06593			1.11928	1.03193			1.11928	0.976504			1.11928	1.87919			1.11928	1.7367			1.11928	1.90215			1.11928	2.2715			1.11928	1.07599			1.11928	1.17293
		1.12584	1.0498			1.12584	1.05599			1.12584	1.02789			1.12584	1.06551			1.12584	1.03204			1.12584	0.977762			1.12584	1.88305			1.12584	1.74169			1.12584	1.90343			1.12584	2.2752			1.12584	1.07794			1.12584	1.17374
		1.13239	1.04973			1.13239	1.0558			1.13239	1.02785			1.13239	1.06548			1.13239	1.03107			1.13239	0.976701			1.13239	1.88603			1.13239	1.73738			1.13239	1.90032			1.13239	2.2725			1.13239	1.07808			1.13239	1.17457
		1.13895	1.04947			1.13895	1.05541			1.13895	1.02776			1.13895	1.06516			1.13895	1.0321			1.13895	0.976809			1.13895	1.89019			1.13895	1.74684			1.13895	1.91418			1.13895	2.28735			1.13895	1.08071			1.13895	1.1743
		1.14551	1.04935			1.14551	1.05508			1.14551	1.02803			1.14551	1.06484			1.14551	1.03322			1.14551	0.978703			1.14551	1.89407			1.14551	1.74413			1.14551	1.90768			1.14551	2.27839			1.14551	1.08148			1.14551	1.17655
		1.15206	1.05318			1.15206	1.05885			1.15206	1.0321			1.15206	1.0685			1.15206	1.03414			1.15206	0.976773			1.15206	1.89861			1.15206	1.75772			1.15206	1.92102			1.15206	2.2975			1.15206	1.08254			1.15206	1.1786
		1.15862	1.05334			1.15862	1.05901			1.15862	1.03221			1.15862	1.0687			1.15862	1.03523			1.15862	0.975451			1.15862	1.90177			1.15862	1.75758			1.15862	1.92643			1.15862	2.29498			1.15862	1.08323			1.15862	1.17818
		1.16518	1.05339			1.16518	1.05895			1.16518	1.03263			1.16518	1.06847			1.16518	1.04046			1.16518	0.976547			1.16518	1.90686			1.16518	1.76195			1.16518	1.9184			1.16518	2.30281			1.16518	1.08975			1.16518	1.17666
		1.17173	1.05338			1.17173	1.05883			1.17173	1.03315			1.17173	1.06808			1.17173	1.04275			1.17173	0.975852			1.17173	1.90755			1.17173	1.7602			1.17173	1.9298			1.17173	2.31128			1.17173	1.09167			1.17173	1.1765
		1.17829	1.05292			1.17829	1.0583			1.17829	1.03262			1.17829	1.0677			1.17829	1.04488			1.17829	0.975593			1.17829	1.91002			1.17829	1.76444			1.17829	1.93304			1.17829	2.31987			1.17829	1.09298			1.17829	1.17861
		1.18485	1.05245			1.18485	1.0577			1.18485	1.03258			1.18485	1.06696			1.18485	1.04744			1.18485	0.976			1.18485	1.91204			1.18485	1.75995			1.18485	1.92615			1.18485	2.29984			1.18485	1.09498			1.18485	1.18055
		1.19141	1.05253			1.19141	1.05757			1.19141	1.03289			1.19141	1.06695			1.19141	1.04913			1.19141	0.973966			1.19141	1.91277			1.19141	1.7711			1.19141	1.93537			1.19141	2.31358			1.19141	1.0962			1.19141	1.18209
		1.19797	1.05311			1.19797	1.05806			1.19797	1.03357			1.19797	1.06752			1.19797	1.04564			1.19797	0.972831			1.19797	1.91422			1.19797	1.76799			1.19797	1.93355			1.19797	2.31082			1.19797	1.09279			1.19797	1.18465
		1.20453	1.05373			1.20453	1.05855			1.20453	1.03413			1.20453	1.06827			1.20453	1.04496			1.20453	0.973115			1.20453	1.9192			1.20453	1.76287			1.20453	1.93477			1.20453	2.31426			1.20453	1.09303			1.20453	1.18996
		1.21109	1.05374			1.21109	1.05853			1.21109	1.03466			1.21109	1.06782			1.21109	1.04735			1.21109	0.974661			1.21109	1.92318			1.21109	1.77514			1.21109	1.93701			1.21109	2.32603			1.21109	1.09473			1.21109	1.18901
		1.21765	1.05361			1.21765	1.05837			1.21765	1.03448			1.21765	1.06776			1.21765	1.04717			1.21765	0.971578			1.21765	1.92676			1.21765	1.78228			1.21765	1.948			1.21765	2.34145			1.21765	1.09561			1.21765	1.189
		1.22421	1.05344			1.22421	1.05817			1.22421	1.0346			1.22421	1.06735			1.22421	1.04727			1.22421	0.973581			1.22421	1.93121			1.22421	1.78926			1.22421	1.95301			1.22421	2.34547			1.22421	1.09604			1.22421	1.19153
		1.23077	1.05319			1.23077	1.05785			1.23077	1.0344			1.23077	1.0671			1.23077	1.0483			1.23077	0.971257			1.23077	1.93594			1.23077	1.78785			1.23077	1.94611			1.23077	2.33835			1.23077	1.09654			1.23077	1.19376
		1.23733	1.05306			1.23733	1.05781			1.23733	1.03424			1.23733	1.06696			1.23733	1.05014			1.23733	0.973685			1.23733	1.93778			1.23733	1.78696			1.23733	1.95185			1.23733	2.346			1.23733	1.09684			1.23733	1.19258
		1.24389	1.05357			1.24389	1.05818			1.24389	1.03475			1.24389	1.06755			1.24389	1.0476			1.24389	0.972844			1.24389	1.9422			1.24389	1.79238			1.24389	1.96553			1.24389	2.35548			1.24389	1.09611			1.24389	1.19457
		1.25045	1.05482			1.25045	1.05925			1.25045	1.03603			1.25045	1.06889			1.25045	1.0474			1.25045	0.972311			1.25045	1.94511			1.25045	1.78809			1.25045	1.96037			1.25045	2.35186			1.25045	1.09564			1.25045	1.19633
		1.25701	1.05541			1.25701	1.05953			1.25701	1.03663			1.25701	1.06968			1.25701	1.04691			1.25701	0.975922			1.25701	1.94562			1.25701	1.80658			1.25701	1.97972			1.25701	2.36858			1.25701	1.09554			1.25701	1.19566
		1.26357	1.05591			1.26357	1.06			1.26357	1.0372			1.26357	1.07014			1.26357	1.04642			1.26357	0.977211			1.26357	1.94929			1.26357	1.79637			1.26357	1.96444			1.26357	2.36065			1.26357	1.09549			1.26357	1.19705
		1.27014	1.05601			1.27014	1.05994			1.27014	1.03774			1.27014	1.06996			1.27014	1.04179			1.27014	0.975319			1.27014	1.95354			1.27014	1.78936			1.27014	1.95307			1.27014	2.35298			1.27014	1.09626			1.27014	1.1969
		1.2767	1.05598			1.2767	1.05977			1.2767	1.03782			1.2767	1.06991			1.2767	1.04192			1.2767	0.977919			1.2767	1.95716			1.2767	1.80523			1.2767	1.98417			1.2767	2.38979			1.2767	1.09771			1.2767	1.19693
		1.28326	1.05557			1.28326	1.05934			1.28326	1.03773			1.28326	1.06924			1.28326	1.04123			1.28326	0.976188			1.28326	1.96597			1.28326	1.8094			1.28326	1.97738			1.28326	2.38535			1.28326	1.0988			1.28326	1.20047
		1.28983	1.05534			1.28983	1.05919			1.28983	1.03763			1.28983	1.06882			1.28983	1.04198			1.28983	0.978347			1.28983	1.96989			1.28983	1.82279			1.28983	1.99591			1.28983	2.39819			1.28983	1.10073			1.28983	1.20274
		1.29639	1.05504			1.29639	1.05866			1.29639	1.03749			1.29639	1.06854			1.29639	1.04365			1.29639	0.976723			1.29639	1.97384			1.29639	1.83641			1.29639	2.00813			1.29639	2.41813			1.29639	1.10259			1.29639	1.20582
		1.30295	1.05509			1.30295	1.05837			1.30295	1.03771			1.30295	1.06866			1.30295	1.04854			1.30295	0.976868			1.30295	1.98077			1.30295	1.80741			1.30295	1.97287			1.30295	2.37703			1.30295	1.10301			1.30295	1.20821
		1.30952	1.05497			1.30952	1.05836			1.30952	1.03757			1.30952	1.0685			1.30952	1.04757			1.30952	0.976973			1.30952	1.98384			1.30952	1.82844			1.30952	2.003			1.30952	2.40131			1.30952	1.10297			1.30952	1.20982
		1.31608	1.05547			1.31608	1.0586			1.31608	1.0381			1.31608	1.06915			1.31608	1.04895			1.31608	0.978356			1.31608	1.98595			1.31608	1.84211			1.31608	2.01107			1.31608	2.429			1.31608	1.10329			1.31608	1.20876
		1.32265	1.05599			1.32265	1.05909			1.32265	1.0386			1.32265	1.0697			1.32265	1.04827			1.32265	0.976381			1.32265	1.99672			1.32265	1.84295			1.32265	2.00662			1.32265	2.41216			1.32265	1.10327			1.32265	1.21018
		1.32921	1.05633			1.32921	1.05939			1.32921	1.03911			1.32921	1.0699			1.32921	1.04751			1.32921	0.978378			1.32921	1.99995			1.32921	1.84619			1.32921	2.01857			1.32921	2.43149			1.32921	1.10415			1.32921	1.21023
		1.33578	1.05675			1.33578	1.05986			1.33578	1.03926			1.33578	1.07056			1.33578	1.04654			1.33578	0.981424			1.33578	2.00507			1.33578	1.8555			1.33578	2.02778			1.33578	2.44572			1.33578	1.10491			1.33578	1.21156
		1.34234	1.05722			1.34234	1.06022			1.34234	1.03986			1.34234	1.07097			1.34234	1.04821			1.34234	0.97877			1.34234	2.01113			1.34234	1.84243			1.34234	2.01873			1.34234	2.42524			1.34234	1.10647			1.34234	1.21354
		1.34891	1.05646			1.34891	1.05923			1.34891	1.03921			1.34891	1.07026			1.34891	1.04873			1.34891	0.983043			1.34891	2.01526			1.34891	1.86548			1.34891	2.03845			1.34891	2.4564			1.34891	1.10831			1.34891	1.21568
		1.35548	1.0563			1.35548	1.05893			1.35548	1.03893			1.35548	1.07032			1.35548	1.04968			1.35548	0.98066			1.35548	2.01983			1.35548	1.86482			1.35548	2.04166			1.35548	2.45461			1.35548	1.11034			1.35548	1.21778
		1.36205	1.05655			1.36205	1.05918			1.36205	1.03891			1.36205	1.07081			1.36205	1.05067			1.36205	0.979765			1.36205	2.02488			1.36205	1.86591			1.36205	2.03899			1.36205	2.45578			1.36205	1.11091			1.36205	1.2212
		1.36861	1.05636			1.36861	1.05892			1.36861	1.0388			1.36861	1.07059			1.36861	1.05164			1.36861	0.980951			1.36861	2.02827			1.36861	1.87465			1.36861	2.0521			1.36861	2.47571			1.36861	1.11174			1.36861	1.22557
		1.37518	1.05656			1.37518	1.0589			1.37518	1.03902			1.37518	1.07094			1.37518	1.05225			1.37518	0.981886			1.37518	2.03071			1.37518	1.86833			1.37518	2.04071			1.37518	2.45784			1.37518	1.11251			1.37518	1.23013
		1.38175	1.05702			1.38175	1.05953			1.38175	1.03931			1.38175	1.07143			1.38175	1.05218			1.38175	0.979377			1.38175	2.0372			1.38175	1.88427			1.38175	2.05613			1.38175	2.46578			1.38175	1.11317			1.38175	1.2332
		1.38832	1.05706			1.38832	1.05953			1.38832	1.03947			1.38832	1.07139			1.38832	1.05072			1.38832	0.981641			1.38832	2.03487			1.38832	1.87914			1.38832	2.05205			1.38832	2.46539			1.38832	1.11288			1.38832	1.23611
		1.39489	1.05641			1.39489	1.0586			1.39489	1.03937			1.39489	1.07043			1.39489	1.05232			1.39489	0.981353			1.39489	2.03746			1.39489	1.9023			1.39489	2.0712			1.39489	2.47665			1.39489	1.11395			1.39489	1.23601
		1.40145	1.05605			1.40145	1.05819			1.40145	1.03928			1.40145	1.06985			1.40145	1.05383			1.40145	0.980717			1.40145	2.03642			1.40145	1.86888			1.40145	2.04001			1.40145	2.44739			1.40145	1.11586			1.40145	1.23867
		1.40802	1.05551			1.40802	1.05756			1.40802	1.03884			1.40802	1.06928			1.40802	1.05601			1.40802	0.978664			1.40802	2.0353			1.40802	1.88729			1.40802	2.05106			1.40802	2.4595			1.40802	1.11713			1.40802	1.23953
		1.41459	1.05526			1.41459	1.05733			1.41459	1.03865			1.41459	1.06896			1.41459	1.05524			1.41459	0.980391			1.41459	2.03041			1.41459	1.88295			1.41459	2.04999			1.41459	2.45131			1.41459	1.11833			1.41459	1.24348
		1.42116	1.0549			1.42116	1.05693			1.42116	1.03831			1.42116	1.06861			1.42116	1.05835			1.42116	0.979574			1.42116	2.03312			1.42116	1.88173			1.42116	2.04266			1.42116	2.44578			1.42116	1.12002			1.42116	1.2429
		1.42773	1.05461			1.42773	1.05683			1.42773	1.03774			1.42773	1.06846			1.42773	1.05908			1.42773	0.97889			1.42773	2.03286			1.42773	1.88302			1.42773	2.04036			1.42773	2.45478			1.42773	1.12162			1.42773	1.24588
		1.43431	1.05412			1.43431	1.05638			1.43431	1.03696			1.43431	1.06821			1.43431	1.05991			1.43431	0.977846			1.43431	2.03483			1.43431	1.88936			1.43431	2.05055			1.43431	2.44846			1.43431	1.12227			1.43431	1.24659
		1.44088	1.05429			1.44088	1.05666			1.44088	1.03716			1.44088	1.06825			1.44088	1.06086			1.44088	0.975595			1.44088	2.04076			1.44088	1.89041			1.44088	2.04687			1.44088	2.45293			1.44088	1.12287			1.44088	1.24926
		1.44745	1.05411			1.44745	1.05629			1.44745	1.0372			1.44745	1.06803			1.44745	1.06444			1.44745	0.97685			1.44745	2.04419			1.44745	1.89578			1.44745	2.05607			1.44745	2.46307			1.44745	1.12355			1.44745	1.249
		1.45402	1.05429			1.45402	1.05621			1.45402	1.03778			1.45402	1.06801			1.45402	1.06592			1.45402	0.979702			1.45402	2.04901			1.45402	1.90936			1.45402	2.0738			1.45402	2.47723			1.45402	1.12426			1.45402	1.25352
		1.46059	1.05457			1.46059	1.05627			1.46059	1.03796			1.46059	1.06853			1.46059	1.06497			1.46059	0.981141			1.46059	2.05798			1.46059	1.90269			1.46059	2.06139			1.46059	2.45286			1.46059	1.12419			1.46059	1.25612
		1.46716	1.05555			1.46716	1.05712			1.46716	1.03905			1.46716	1.06949			1.46716	1.06352			1.46716	0.979336			1.46716	2.06363			1.46716	1.90996			1.46716	2.06987			1.46716	2.49724			1.46716	1.12457			1.46716	1.25803
		1.47374	1.05568			1.47374	1.05707			1.47374	1.03905			1.47374	1.06986			1.47374	1.0622			1.47374	0.982924			1.47374	2.06971			1.47374	1.93888			1.47374	2.08285			1.47374	2.51268			1.47374	1.12483			1.47374	1.26043
		1.48031	1.05592			1.48031	1.05727			1.48031	1.03903			1.48031	1.07037			1.48031	1.06258			1.48031	0.980275			1.48031	2.07813			1.48031	1.92781			1.48031	2.07526			1.48031	2.50621			1.48031	1.12464			1.48031	1.26351
		1.48688	1.05627			1.48688	1.05784			1.48688	1.03904			1.48688	1.07089			1.48688	1.06355			1.48688	0.982385			1.48688	2.08602			1.48688	1.94137			1.48688	2.09799			1.48688	2.52092			1.48688	1.12576			1.48688	1.26669
		1.49346	1.0565			1.49346	1.05814			1.49346	1.03928			1.49346	1.07106			1.49346	1.06474			1.49346	0.979235			1.49346	2.08999			1.49346	1.94473			1.49346	2.09328			1.49346	2.52514			1.49346	1.12643			1.49346	1.26902
		1.50003	1.0562			1.50003	1.05776			1.50003	1.03897			1.50003	1.07081			1.50003	1.06687			1.50003	0.978774			1.50003	2.09344			1.50003	1.9608			1.50003	2.10125			1.50003	2.52526			1.50003	1.12675			1.50003	1.27005
		1.50661	1.05559			1.50661	1.0571			1.50661	1.03837			1.50661	1.07025			1.50661	1.06824			1.50661	0.982345			1.50661	2.09504			1.50661	1.95817			1.50661	2.10591			1.50661	2.52464			1.50661	1.12853			1.50661	1.2709
		1.51318	1.0553			1.51318	1.05696			1.51318	1.03825			1.51318	1.0697			1.51318	1.06685			1.51318	0.981332			1.51318	2.0967			1.51318	1.95038			1.51318	2.09222			1.51318	2.50804			1.51318	1.13029			1.51318	1.27276
		1.51976	1.05515			1.51976	1.05638			1.51976	1.03791			1.51976	1.06999			1.51976	1.06567			1.51976	0.980062			1.51976	2.09587			1.51976	1.95483			1.51976	2.10156			1.51976	2.52497			1.51976	1.13066			1.51976	1.27462
		1.52633	1.05479			1.52633	1.05592			1.52633	1.03763			1.52633	1.06964			1.52633	1.06477			1.52633	0.980028			1.52633	2.09578			1.52633	1.96201			1.52633	2.10192			1.52633	2.50448			1.52633	1.13111			1.52633	1.27526
		1.53291	1.05441			1.53291	1.05541			1.53291	1.03724			1.53291	1.06936			1.53291	1.06439			1.53291	0.979597			1.53291	2.09743			1.53291	1.95526			1.53291	2.09843			1.53291	2.52159			1.53291	1.13236			1.53291	1.27463
		1.53948	1.05436			1.53948	1.05548			1.53948	1.03706			1.53948	1.06934			1.53948	1.06532			1.53948	0.978329			1.53948	2.09588			1.53948	1.95998			1.53948	2.10092			1.53948	2.53039			1.53948	1.1327			1.53948	1.27614
		1.54606	1.05422			1.54606	1.05515			1.54606	1.03669			1.54606	1.06953			1.54606	1.06717			1.54606	0.978384			1.54606	2.09691			1.54606	1.95789			1.54606	2.09861			1.54606	2.52406			1.54606	1.13361			1.54606	1.27911
		1.55264	1.05354			1.55264	1.05465			1.55264	1.03612			1.55264	1.06864			1.55264	1.06735			1.55264	0.979672			1.55264	2.09949			1.55264	1.96206			1.55264	2.08636			1.55264	2.49286			1.55264	1.13317			1.55264	1.27876
		1.55921	1.05335			1.55921	1.05433			1.55921	1.0358			1.55921	1.06865			1.55921	1.06831			1.55921	0.979633			1.55921	2.09843			1.55921	1.97198			1.55921	2.09957			1.55921	2.51665			1.55921	1.13463			1.55921	1.28152
		1.56579	1.05292			1.56579	1.05374			1.56579	1.03545			1.56579	1.06827			1.56579	1.06712			1.56579	0.977688			1.56579	2.09737			1.56579	1.97786			1.56579	2.10548			1.56579	2.52165			1.56579	1.13483			1.56579	1.28694
		1.57237	1.05293			1.57237	1.05345			1.57237	1.03537			1.57237	1.06856			1.57237	1.06632			1.57237	0.977206			1.57237	2.09813			1.57237	1.96758			1.57237	2.08912			1.57237	2.50427			1.57237	1.135			1.57237	1.28934
		1.57895	1.05344			1.57895	1.05365			1.57895	1.03594			1.57895	1.06922			1.57895	1.06387			1.57895	0.979853			1.57895	2.09788			1.57895	1.96305			1.57895	2.0845			1.57895	2.5122			1.57895	1.13433			1.57895	1.29049
		1.58552	1.0533			1.58552	1.05357			1.58552	1.03585			1.58552	1.06901			1.58552	1.06289			1.58552	0.979117			1.58552	2.09876			1.58552	1.96829			1.58552	2.08209			1.58552	2.51269			1.58552	1.13569			1.58552	1.29223
		1.5921	1.05311			1.5921	1.05339			1.5921	1.0358			1.5921	1.06867			1.5921	1.06276			1.5921	0.977563			1.5921	2.10033			1.5921	1.97686			1.5921	2.09021			1.5921	2.52023			1.5921	1.13484			1.5921	1.29431
		1.59868	1.05344			1.59868	1.05399			1.59868	1.03582			1.59868	1.06911			1.59868	1.0637			1.59868	0.979125			1.59868	2.10102			1.59868	1.98636			1.59868	2.10213			1.59868	2.53613			1.59868	1.13594			1.59868	1.29454
		1.60526	1.05258			1.60526	1.05264			1.60526	1.03547			1.60526	1.06811			1.60526	1.06194			1.60526	0.977185			1.60526	2.10375			1.60526	1.9783			1.60526	2.09304			1.60526	2.51487			1.60526	1.13625			1.60526	1.29793
		1.61184	1.05173			1.61184	1.0517			1.61184	1.03471			1.61184	1.06724			1.61184	1.06223			1.61184	0.978903			1.61184	2.10682			1.61184	1.97286			1.61184	2.0866			1.61184	2.49992			1.61184	1.13698			1.61184	1.29812
		1.61842	1.05138			1.61842	1.05125			1.61842	1.03446			1.61842	1.06688			1.61842	1.06419			1.61842	0.976493			1.61842	2.10367			1.61842	1.98782			1.61842	2.09194			1.61842	2.51917			1.61842	1.13719			1.61842	1.30588
		1.625	1.05048			1.625	1.05036			1.625	1.03356			1.625	1.06596			1.625	1.06373			1.625	0.977849			1.625	2.10264			1.625	1.99635			1.625	2.09871			1.625	2.54294			1.625	1.13806			1.625	1.30672
		1.63158	1.05003			1.63158	1.05007			1.63158	1.03288			1.63158	1.06561			1.63158	1.0606			1.63158	0.973215			1.63158	2.10455			1.63158	1.97569			1.63158	2.0866			1.63158	2.50409			1.63158	1.13661			1.63158	1.30914
		1.63816	1.04934			1.63816	1.04988			1.63816	1.03178			1.63816	1.06495			1.63816	1.05637			1.63816	0.977907			1.63816	2.10062			1.63816	1.98244			1.63816	2.07552			1.63816	2.51708			1.63816	1.13589			1.63816	1.30909
		1.64474	1.04335			1.64474	1.04972			1.64474	1.02615			1.64474	1.05869			1.64474	1.05086			1.64474	0.975567			1.64474	2.10281			1.64474	1.98635			1.64474	2.09368			1.64474	2.50469			1.64474	1.13713			1.64474	1.27981
		1.65133	1.04398			1.65133	1.05054			1.65133	1.02691			1.65133	1.05919			1.65133	1.04715			1.65133	0.964313			1.65133	2.09809			1.65133	1.98581			1.65133	2.06831			1.65133	2.45648			1.65133	1.13811			1.65133	1.24919
		1.65791	1.04536				1.05177			1.65791	1.02883			1.65791	1.06035			1.65791	1.04569			1.65791	0.981228			1.65791	2.10037			1.65791	2.0224			1.65791	2.10507			1.65791	2.52077			1.65791	1.13902			1.65791	1.25291
		1.66449	1.0453			1.66449	1.05088			1.66449	1.0298			1.66449	1.0598			1.66449	1.04599			1.66449	0.984413			1.66449	2.10176			1.66449	1.96663			1.66449	2.05462			1.66449	2.46006			1.66449	1.14033			1.66449	1.25273
		1.67107	1.0462			1.67107	1.05189			1.67107	1.03087			1.67107	1.06061			1.67107	1.04976			1.67107	0.980949			1.67107	2.10361			1.67107	1.99956			1.67107	2.08662			1.67107	2.51136			1.67107	1.14231			1.67107	1.25306
		1.67766	1.05183			1.67766	1.0515			1.67766	1.03621			1.67766	1.06627			1.67766	1.05516			1.67766	0.976841			1.67766	2.10175			1.67766	2.00164			1.67766	2.08929			1.67766	2.51909			1.67766	1.14258			1.67766	1.28837
		1.68424	1.05136			1.68424	1.05079			1.68424	1.03583			1.68424	1.06588			1.68424	1.05689			1.68424	0.976967			1.68424	2.1115			1.68424	1.99287			1.68424	2.07191			1.68424	2.48928			1.68424	1.14294			1.68424	1.32189
		1.69082	1.05105			1.69082	1.05077			1.69082	1.03495			1.69082	1.0659			1.69082	1.05678			1.69082	0.980294			1.69082	2.11361			1.69082	2.01029			1.69082	2.09385			1.69082	2.52572			1.69082	1.1427			1.69082	1.32333
		1.69741	1.05157			1.69741	1.05143			1.69741	1.03508			1.69741	1.06669			1.69741	1.05377			1.69741	0.978689			1.69741	2.11451			1.69741	2.01136			1.69741	2.09866			1.69741	2.53503			1.69741	1.1423			1.69741	1.32831
		1.70399	1.05194			1.70399	1.05183			1.70399	1.0354			1.70399	1.06707			1.70399	1.05199			1.70399	0.9761			1.70399	2.11669			1.70399	2.01302			1.70399	2.09265			1.70399	2.52634			1.70399	1.14137			1.70399	1.33163
		1.71058	1.053			1.71058	1.05296			1.71058	1.03615			1.71058	1.06837			1.71058	1.05045			1.71058	0.976561			1.71058	2.11711			1.71058	2.01175			1.71058	2.08947			1.71058	2.51883			1.71058	1.13989			1.71058	1.33279
		1.71716	1.05399			1.71716	1.05417			1.71716	1.03682			1.71716	1.0695			1.71716	1.04855			1.71716	0.975284			1.71716	2.11531			1.71716	2.00531			1.71716	2.07615			1.71716	2.51503			1.71716	1.13879			1.71716	1.33238
		1.72375	1.05453			1.72375	1.05458			1.72375	1.03744			1.72375	1.07004			1.72375	1.04923			1.72375	0.977591			1.72375	2.11288			1.72375	2.01937			1.72375	2.09033			1.72375	2.52273			1.72375	1.13934			1.72375	1.33672
		1.73033	1.05471			1.73033	1.05473			1.73033	1.03763			1.73033	1.07025			1.73033	1.05196			1.73033	0.976458			1.73033	2.11114			1.73033	2.00925			1.73033	2.08685			1.73033	2.51283			1.73033	1.13999			1.73033	1.33635
		1.73692	1.05508			1.73692	1.05503			1.73692	1.03796			1.73692	1.0707			1.73692	1.05189			1.73692	0.974916			1.73692	2.11264			1.73692	2.00997			1.73692	2.07372			1.73692	2.50609			1.73692	1.14023			1.73692	1.33787
		1.74351	1.05444			1.74351	1.05423			1.74351	1.03773			1.74351	1.06979			1.74351	1.05218			1.74351	0.975065			1.74351	2.11198			1.74351	2.01071			1.74351	2.07244			1.74351	2.51089			1.74351	1.14182			1.74351	1.33986
		1.75009	1.05351			1.75009	1.05298			1.75009	1.03723			1.75009	1.0687			1.75009	1.0541			1.75009	0.97473			1.75009	2.1091			1.75009	2.01846			1.75009	2.08406			1.75009	2.50369			1.75009	1.14405			1.75009	1.34212
		1.75668	1.05267			1.75668	1.05208			1.75668	1.03665			1.75668	1.06767			1.75668	1.05324			1.75668	0.975862			1.75668	2.10563			1.75668	2.02066			1.75668	2.0845			1.75668	2.51272			1.75668	1.14315			1.75668	1.34001
		1.76327	1.05149			1.76327	1.05105			1.76327	1.03545			1.76327	1.06638			1.76327	1.05687			1.76327	0.973596			1.76327	2.10679			1.76327	2.00663			1.76327	2.06311			1.76327	2.48921			1.76327	1.14745			1.76327	1.34404
		1.76985	1.05097			1.76985	1.05053			1.76985	1.03507			1.76985	1.06574			1.76985	1.05811			1.76985	0.97382			1.76985	2.10659			1.76985	1.99778			1.76985	2.05245			1.76985	2.48431			1.76985	1.14806			1.76985	1.34498
		1.77644	1.0514			1.77644	1.05091			1.77644	1.03529			1.77644	1.06639			1.77644	1.05797			1.77644	0.974103			1.77644	2.10502			1.77644	2.02201			1.77644	2.07648			1.77644	2.50472			1.77644	1.14622			1.77644	1.34479
		1.78303	1.0512			1.78303	1.05069			1.78303	1.03486			1.78303	1.06643			1.78303	1.05673			1.78303	0.973408			1.78303	2.106			1.78303	2.02029			1.78303	2.0777			1.78303	2.50992			1.78303	1.14398			1.78303	1.34331
		1.78962	1.05118			1.78962	1.05078			1.78962	1.03468			1.78962	1.06647			1.78962	1.05712			1.78962	0.973881			1.78962	2.10825			1.78962	2.02022			1.78962	2.0684			1.78962	2.50605			1.78962	1.14432			1.78962	1.3438
		1.79621	1.05176			1.79621	1.05135			1.79621	1.03526			1.79621	1.06707			1.79621	1.05656			1.79621	0.973216			1.79621	2.10966			1.79621	2.01321			1.79621	2.06408			1.79621	2.50049			1.79621	1.13986			1.79621	1.34233
		1.8028	1.05192			1.8028	1.05155			1.8028	1.03532			1.8028	1.06728			1.8028	1.05596			1.8028	0.973292			1.8028	2.10992			1.8028	2.01166			1.8028	2.05992			1.8028	2.49856			1.8028	1.13959			1.8028	1.34325
		1.80939	1.05141			1.80939	1.05107			1.80939	1.03486			1.80939	1.0667			1.80939	1.05644			1.80939	0.97443			1.80939	2.11137			1.80939	2.02955			1.80939	2.08128			1.80939	2.51663			1.80939	1.14064			1.80939	1.34315
		1.81598	1.05152			1.81598	1.05145			1.81598	1.03477			1.81598	1.06682			1.81598	1.05588			1.81598	0.974444			1.81598	2.11258			1.81598	2.02427			1.81598	2.07295			1.81598	2.52091			1.81598	1.14069			1.81598	1.3447
		1.82257	1.05161			1.82257	1.05151			1.82257	1.03472			1.82257	1.06706			1.82257	1.05585			1.82257	0.972031			1.82257	2.11471			1.82257	2.02746			1.82257	2.07612			1.82257	2.51192			1.82257	1.14069			1.82257	1.34652
		1.82916	1.0518			1.82916	1.05158			1.82916	1.0348			1.82916	1.06744			1.82916	1.05364			1.82916	0.973916			1.82916	2.11363			1.82916	2.02321			1.82916	2.06666			1.82916	2.50455			1.82916	1.14059			1.82916	1.34888
		1.83575	1.05205			1.83575	1.05156			1.83575	1.03532			1.83575	1.06763			1.83575	1.05532			1.83575	0.972137			1.83575	2.10864			1.83575	2.02451			1.83575	2.06864			1.83575	2.50782			1.83575	1.14029			1.83575	1.3503
		1.84234	1.05225			1.84234	1.05177			1.84234	1.03549			1.84234	1.06784			1.84234	1.05555			1.84234	0.969876			1.84234	2.1058			1.84234	2.02779			1.84234	2.07429			1.84234	2.50486			1.84234	1.13964			1.84234	1.35298
		1.84893	1.05265			1.84893	1.05209			1.84893	1.03602			1.84893	1.06818			1.84893	1.05484			1.84893	0.970532			1.84893	2.10962			1.84893	2.00997			1.84893	2.04317			1.84893	2.47722			1.84893	1.13946			1.84893	1.35283
		1.85552	1.05281			1.85552	1.05223			1.85552	1.03629			1.85552	1.06825			1.85552	1.05505			1.85552	0.970916			1.85552	2.11005			1.85552	2.02087			1.85552	2.05291			1.85552	2.50033			1.85552	1.13959			1.85552	1.35224
		1.86212	1.05257			1.86212	1.05189			1.86212	1.03619			1.86212	1.06794			1.86212	1.05447			1.86212	0.972578			1.86212	2.10796			1.86212	2.04277			1.86212	2.07967			1.86212	2.5403			1.86212	1.14028			1.86212	1.35237
		1.86871	1.05217			1.86871	1.05175			1.86871	1.03547			1.86871	1.06765			1.86871	1.05261			1.86871	0.970759			1.86871	2.11145			1.86871	2.03205			1.86871	2.06617			1.86871	2.50693			1.86871	1.14077			1.86871	1.35263
		1.8753	1.05181			1.8753	1.05139			1.8753	1.03493			1.8753	1.06747			1.8753	1.05056			1.8753	0.968636			1.8753	2.10693			1.8753	2.0191			1.8753	2.06366			1.8753	2.48923			1.8753	1.14099			1.8753	1.35236
		1.8819	1.05181			1.8819	1.05157			1.8819	1.03472			1.8819	1.06754			1.8819	1.04966			1.8819	0.967909			1.8819	2.09766			1.8819	2.02261			1.8819	2.06951			1.8819	2.48351			1.8819	1.14039			1.8819	1.34707
		1.88849	1.05187			1.88849	1.05188			1.88849	1.03459			1.88849	1.06759			1.88849	1.04914			1.88849	0.968383			1.88849	2.08271			1.88849	1.99861			1.88849	2.03911			1.88849	2.45092			1.88849	1.14			1.88849	1.34632
		1.89508	1.05251			1.89508	1.05267			1.89508	1.03526			1.89508	1.06809			1.89508	1.04791			1.89508	0.965792			1.89508	2.06771			1.89508	2.00056			1.89508	2.0382			1.89508	2.46667			1.89508	1.13869			1.89508	1.34562
		1.90168	1.05284			1.90168	1.05286			1.90168	1.03583			1.90168	1.06831			1.90168	1.04581			1.90168	0.966444			1.90168	2.04826			1.90168	1.96277			1.90168	1.999			1.90168	2.39308			1.90168	1.13717			1.90168	1.34517
		1.90827	1.05329			1.90827	1.05344			1.90827	1.03626			1.90827	1.06868			1.90827	1.04448			1.90827	0.964853			1.90827	2.03276			1.90827	1.95353			1.90827	1.98755			1.90827	2.38835			1.90827	1.13681			1.90827	1.34394
		1.91487	1.05352			1.91487	1.05346			1.91487	1.03667			1.91487	1.0689			1.91487	1.04433			1.91487	0.964263			1.91487	2.01634			1.91487	1.93945			1.91487	1.96436			1.91487	2.36561			1.91487	1.13696			1.91487	1.34882
		1.92146	1.05342			1.92146	1.05309			1.92146	1.03655			1.92146	1.06902			1.92146	1.04254			1.92146	0.962978			1.92146	2.01349			1.92146	1.92886			1.92146	1.95684			1.92146	2.36359			1.92146	1.13714			1.92146	1.34962
		1.92806	1.05328			1.92806	1.05306			1.92806	1.03623			1.92806	1.06895			1.92806	1.04165			1.92806	0.962635			1.92806	2.01326			1.92806	1.92265			1.92806	1.95389			1.92806	2.37792			1.92806	1.13792			1.92806	1.3452
		1.93465	1.05294			1.93465	1.05254			1.93465	1.03588			1.93465	1.06874			1.93465	1.0438			1.93465	0.964635			1.93465	2.02064			1.93465	1.95464			1.93465	1.97741			1.93465	2.38158			1.93465	1.14038			1.93465	1.34407
		1.94125	1.05276			1.94125	1.05233			1.94125	1.03562			1.94125	1.06866			1.94125	1.04519			1.94125	0.961296			1.94125	2.02488			1.94125	1.95287			1.94125	1.98568			1.94125	2.38762			1.94125	1.14178			1.94125	1.3437
		1.94785	1.0526			1.94785	1.05214			1.94785	1.03521			1.94785	1.06874			1.94785	1.04659			1.94785	0.958388			1.94785	2.03168			1.94785	1.96981			1.94785	2.00968			1.94785	2.39826			1.94785	1.14316			1.94785	1.3446
		1.95444	1.05303			1.95444	1.05252			1.95444	1.03572			1.95444	1.06913			1.95444	1.04806			1.95444	0.959127			1.95444	2.03816			1.95444	1.93632			1.95444	1.99658			1.95444	2.37282			1.95444	1.14398			1.95444	1.34191
		1.96104	1.05274			1.96104	1.05247			1.96104	1.03521			1.96104	1.06889			1.96104	1.0497			1.96104	0.963211			1.96104	2.04171			1.96104	1.95287			1.96104	1.99826			1.96104	2.39319			1.96104	1.14479			1.96104	1.34503
		1.96764	1.053			1.96764	1.05289			1.96764	1.03512			1.96764	1.06936			1.96764	1.05046			1.96764	0.962011			1.96764	2.04064			1.96764	1.96945			1.96764	2.0246			1.96764	2.42483			1.96764	1.14495			1.96764	1.34637
		1.97424	1.05311			1.97424	1.05315			1.97424	1.03503			1.97424	1.06955			1.97424	1.0513			1.97424	0.960406			1.97424	2.05112			1.97424	1.96064			1.97424	2.01743			1.97424	2.39523			1.97424	1.14576			1.97424	1.34865
		1.98084	1.05214			1.98084	1.05221			1.98084	1.03399			1.98084	1.0686			1.98084	1.04846			1.98084	0.962338			1.98084	2.0633			1.98084	1.95829			1.98084	2.01303			1.98084	2.38641			1.98084	1.1472			1.98084	1.34776
		1.98743	1.05209			1.98743	1.05232			1.98743	1.03377			1.98743	1.0686			1.98743	1.04434			1.98743	0.962115			1.98743	2.0619			1.98743	1.99531			1.98743	2.04366			1.98743	2.42042			1.98743	1.14831			1.98743	1.34658
		1.99403	1.05206			1.99403	1.0518			1.99403	1.03391			1.99403	1.06875			1.99403	1.04608			1.99403	0.961247			1.99403	2.05965			1.99403	2.00805			1.99403	2.06246			1.99403	2.4621			1.99403	1.14925			1.99403	1.34797
		2.00063	1.05122			2.00063	1.05084			2.00063	1.0333			2.00063	1.06779			2.00063	1.04748			2.00063	0.952755			2.00063	2.06304			2.00063	1.96127			2.00063	2.02619			2.00063	2.39636			2.00063	1.1506			2.00063	1.34774
		2.00723	1.05135			2.00723	1.05066			2.00723	1.03371			2.00723	1.06789			2.00723	1.04974			2.00723	0.961098			2.00723	2.06961			2.00723	1.95267			2.00723	2.00611			2.00723	2.37403			2.00723	1.15031			2.00723	1.34856
		2.01383	1.05164			2.01383	1.05109			2.01383	1.03392			2.01383	1.06815			2.01383	1.05519			2.01383	0.96065			2.01383	2.07026			2.01383	1.9563			2.01383	2.03866			2.01383	2.43644			2.01383	1.15063			2.01383	1.3531
		2.02043	1.0508			2.02043	1.0502			2.02043	1.03296			2.02043	1.06745			2.02043	1.06066			2.02043	0.956657			2.02043	2.08057			2.02043	2.014			2.02043	2.07872			2.02043	2.49058			2.02043	1.15142			2.02043	1.35961
		2.02703	1.0508			2.02703	1.05049			2.02703	1.03259			2.02703	1.06759			2.02703	1.06081			2.02703	0.959171			2.02703	2.0932			2.02703	2.01145			2.02703	2.06861			2.02703	2.45655			2.02703	1.15229			2.02703	1.3612
		2.03363	1.05177			2.03363	1.05162			2.03363	1.03301			2.03363	1.06896			2.03363	1.05988			2.03363	0.960083			2.03363	2.10176			2.03363	2.01662			2.03363	2.07122			2.03363	2.45545			2.03363	1.15229			2.03363	1.36286
		2.04024	1.05228			2.04024	1.05224			2.04024	1.03307			2.04024	1.0698			2.04024	1.05981			2.04024	0.961069			2.04024	2.09831			2.04024	2.00976			2.04024	2.06847			2.04024	2.45797			2.04024	1.15338			2.04024	1.36325
		2.04684	1.05312			2.04684	1.05317			2.04684	1.03367			2.04684	1.07079			2.04684	1.05894			2.04684	0.961254			2.04684	2.09826			2.04684	2.01223			2.04684	2.0711			2.04684	2.46929			2.04684	1.15401			2.04684	1.35715
		2.05344	1.05377			2.05344	1.05402			2.05344	1.03425			2.05344	1.07136			2.05344	1.05896			2.05344	0.964194			2.05344	2.10227			2.05344	2.00302			2.05344	2.05754			2.05344	2.46539			2.05344	1.15311			2.05344	1.35589
		2.06004	1.05474			2.06004	1.05487			2.06004	1.03523			2.06004	1.07239			2.06004	1.05866			2.06004	0.966192			2.06004	2.10601			2.06004	2.00609			2.06004	2.06537			2.06004	2.48084			2.06004	1.15394			2.06004	1.35512
		2.06664	1.05447			2.06664	1.05466			2.06664	1.03529			2.06664	1.0718			2.06664	1.05774			2.06664	0.963304			2.06664	2.10688			2.06664	2.02726			2.06664	2.09209			2.06664	2.5021			2.06664	1.15377			2.06664	1.3563
		2.07325	1.05366			2.07325	1.05393			2.07325	1.03472			2.07325	1.07071			2.07325	1.05542			2.07325	0.96266			2.07325	2.11109			2.07325	2.02911			2.07325	2.08086			2.07325	2.49318			2.07325	1.15357			2.07325	1.35382
		2.07985	1.05343			2.07985	1.0534			2.07985	1.03486			2.07985	1.07035			2.07985	1.05476			2.07985	0.963844			2.07985	2.1183			2.07985	2.01154			2.07985	2.07957			2.07985	2.47712			2.07985	1.15311			2.07985	1.35652
		2.08645	1.05342			2.08645	1.05319			2.08645	1.03521			2.08645	1.07016			2.08645	1.05511			2.08645	0.961496			2.08645	2.11771			2.08645	2.02365			2.08645	2.08047			2.08645	2.48241			2.08645	1.15416			2.08645	1.35444
		2.09306	1.05412			2.09306	1.05393			2.09306	1.03618			2.09306	1.07059			2.09306	1.05415			2.09306	0.963592			2.09306	2.12071			2.09306	2.04726			2.09306	2.09905			2.09306	2.50813			2.09306	1.15347			2.09306	1.35354
		2.09966	1.05483			2.09966	1.05454			2.09966	1.03678			2.09966	1.07147			2.09966	1.05415			2.09966	0.964749			2.09966	2.12596			2.09966	2.0287			2.09966	2.08565			2.09966	2.49565			2.09966	1.15391			2.09966	1.34784
		2.10627	1.0561			2.10627	1.05566			2.10627	1.03827			2.10627	1.07263			2.10627	1.05657			2.10627	0.962991			2.10627	2.12992			2.10627	2.0413			2.10627	2.09564			2.10627	2.51756			2.10627	1.15438			2.10627	1.34805
		2.11287	1.05716			2.11287	1.05668			2.11287	1.03931			2.11287	1.07374			2.11287	1.05578			2.11287	0.966248			2.11287	2.13363			2.11287	2.04126			2.11287	2.10193			2.11287	2.50386			2.11287	1.15531			2.11287	1.34809
		2.11948	1.0581			2.11948	1.05735			2.11948	1.04022			2.11948	1.07489			2.11948	1.05417			2.11948	0.967799			2.11948	2.1402			2.11948	2.04425			2.11948	2.09464			2.11948	2.51646			2.11948	1.15603			2.11948	1.34985
		2.12608	1.05929			2.12608	1.05843			2.12608	1.0411			2.12608	1.07643			2.12608	1.05397			2.12608	0.966305			2.12608	2.14376			2.12608	2.06146			2.12608	2.11268			2.12608	2.55447			2.12608	1.15642			2.12608	1.34858
		2.13269	1.0612			2.13269	1.06054			2.13269	1.04297			2.13269	1.07824			2.13269	1.05458			2.13269	0.968141			2.13269	2.14641			2.13269	2.05865			2.13269	2.11333			2.13269	2.55277			2.13269	1.15625			2.13269	1.35184
		2.1393	1.06098			2.1393	1.06023			2.1393	1.04267			2.1393	1.07817			2.1393	1.05326			2.1393	0.96932			2.1393	2.15034			2.1393	2.05501			2.1393	2.11526			2.1393	2.54267			2.1393	1.15714			2.1393	1.35101
		2.1459	1.06045			2.1459	1.05987			2.1459	1.04228			2.1459	1.07739			2.1459	1.05303			2.1459	0.967849			2.1459	2.14728			2.1459	2.05301			2.1459	2.11172			2.1459	2.53187			2.1459	1.15702			2.1459	1.35184
		2.15251	1.0601			2.15251	1.05979			2.15251	1.04165			2.15251	1.0771			2.15251	1.05231			2.15251	0.967959			2.15251	2.14757			2.15251	2.05911			2.15251	2.11744			2.15251	2.54177			2.15251	1.1574			2.15251	1.3512
		2.15912	1.05856			2.15912	1.05836			2.15912	1.04021			2.15912	1.07539			2.15912	1.05297			2.15912	0.968948			2.15912	2.14751			2.15912	2.04377			2.15912	2.10089			2.15912	2.53637			2.15912	1.15784			2.15912	1.35385
		2.16572	1.05737			2.16572	1.05708			2.16572	1.03898			2.16572	1.07432			2.16572	1.05326			2.16572	0.965294			2.16572	2.14911			2.16572	2.05706			2.16572	2.11816			2.16572	2.55362			2.16572	1.1592			2.16572	1.35381
		2.17233	1.05767			2.17233	1.0574			2.17233	1.03923			2.17233	1.07463			2.17233	1.04988			2.17233	0.967708			2.17233	2.14758			2.17233	2.05177			2.17233	2.11384			2.17233	2.55471			2.17233	1.15873			2.17233	1.3527
		2.17894	1.05808			2.17894	1.05734			2.17894	1.03969			2.17894	1.07532			2.17894	1.05096			2.17894	0.967957			2.17894	2.14785			2.17894	2.05766			2.17894	2.11731			2.17894	2.55737			2.17894	1.15782			2.17894	1.35078
		2.18555	1.05848			2.18555	1.05759			2.18555	1.04026			2.18555	1.07568			2.18555	1.05206			2.18555	0.966069			2.18555	2.14716			2.18555	2.04765			2.18555	2.11097			2.18555	2.54247			2.18555	1.15713			2.18555	1.34753
		2.19216	1.05794			2.19216	1.05706			2.19216	1.03952			2.19216	1.07532			2.19216	1.05384			2.19216	0.967746			2.19216	2.14675			2.19216	2.04651			2.19216	2.11007			2.19216	2.51034			2.19216	1.1577			2.19216	1.34392
		2.19877	1.05713			2.19877	1.05657			2.19877	1.0385			2.19877	1.07448			2.19877	1.05271			2.19877	0.966324			2.19877	2.14397			2.19877	2.05443			2.19877	2.11597			2.19877	2.54408			2.19877	1.15736			2.19877	1.34047
		2.20538	1.05717			2.20538	1.05672			2.20538	1.03834			2.20538	1.07462			2.20538	1.05574			2.20538	0.965701			2.20538	2.14034			2.20538	2.04769			2.20538	2.11713			2.20538	2.54311			2.20538	1.15799			2.20538	1.3377
		2.21199	1.05734			2.21199	1.05744			2.21199	1.0381			2.21199	1.07478			2.21199	1.05579			2.21199	0.966533			2.21199	2.13974			2.21199	2.04088			2.21199	2.1094			2.21199	2.53493			2.21199	1.1605			2.21199	1.33586
		2.2186	1.05784			2.2186	1.05779			2.2186	1.03849			2.2186	1.07548			2.2186	1.05618			2.2186	0.965106			2.2186	2.13755			2.2186	2.02631			2.2186	2.09846			2.2186	2.51772			2.2186	1.16126			2.2186	1.33482
		2.22521	1.05864			2.22521	1.0583			2.22521	1.03952			2.22521	1.07627			2.22521	1.05408			2.22521	0.965343			2.22521	2.13613			2.22521	2.03824			2.22521	2.10324			2.22521	2.53477			2.22521	1.16188			2.22521	1.33217
		2.23182	1.05948			2.23182	1.05877			2.23182	1.04045			2.23182	1.07728			2.23182	1.05448			2.23182	0.965096			2.23182	2.1331			2.23182	2.0394			2.23182	2.10748			2.23182	2.53865			2.23182	1.16303			2.23182	1.33061
		2.23843	1.0601			2.23843	1.05932			2.23843	1.04104			2.23843	1.07798			2.23843	1.05393			2.23843	0.965196			2.23843	2.13472			2.23843	2.03561			2.23843	2.10908			2.23843	2.55397			2.23843	1.16342			2.23843	1.33068
		2.24504	1.06076			2.24504	1.05965			2.24504	1.04164			2.24504	1.07893			2.24504	1.05379			2.24504	0.966846			2.24504	2.13018			2.24504	2.02179			2.24504	2.09409			2.24504	2.53254			2.24504	1.16346			2.24504	1.32785
		2.25165	1.06079			2.25165	1.05955			2.25165	1.04157			2.25165	1.07913			2.25165	1.05298			2.25165	0.965121			2.25165	2.12585			2.25165	2.02466			2.25165	2.10693			2.25165	2.55518			2.25165	1.16389			2.25165	1.32736
		2.25827	1.06101			2.25827	1.05952			2.25827	1.04197			2.25827	1.07936			2.25827	1.05272			2.25827	0.965476			2.25827	2.12138			2.25827	2.01022			2.25827	2.08418			2.25827	2.51775			2.25827	1.16341			2.25827	1.32532
		2.26488	1.06145			2.26488	1.05978			2.26488	1.04237			2.26488	1.07995			2.26488	1.05147			2.26488	0.964275			2.26488	2.11454			2.26488	2.01364			2.26488	2.08763			2.26488	2.52446			2.26488	1.16088			2.26488	1.32466
		2.27149	1.06163			2.27149	1.06015			2.27149	1.04261			2.27149	1.07995			2.27149	1.05021			2.27149	0.962462			2.27149	2.10091			2.27149	2.01614			2.27149	2.08924			2.27149	2.51539			2.27149	1.15966			2.27149	1.32056
		2.2781	1.06206			2.2781	1.06069			2.2781	1.04315			2.2781	1.08022			2.2781	1.04803			2.2781	0.962959			2.2781	2.088			2.2781	1.98291			2.2781	2.06193			2.2781	2.50678			2.2781	1.16517			2.2781	1.31674
		2.28472	1.0628			2.28472	1.06166			2.28472	1.04386			2.28472	1.08083			2.28472	1.04605			2.28472	0.961481			2.28472	2.07397			2.28472	1.96214			2.28472	2.03888			2.28472	2.46927			2.28472	1.16507			2.28472	1.31019
		2.29133	1.06365			2.29133	1.06287			2.29133	1.04456			2.29133	1.08157			2.29133	1.04389			2.29133	0.959736			2.29133	2.06062			2.29133	1.94856			2.29133	2.01889			2.29133	2.4463			2.29133	1.16454			2.29133	1.30676
		2.29795	1.06467			2.29795	1.06413			2.29795	1.0457			2.29795	1.0823			2.29795	1.04216			2.29795	0.95864			2.29795	2.05315			2.29795	1.94637			2.29795	2.01711			2.29795	2.44646			2.29795	1.16541			2.29795	1.29828
		2.30456	1.06551			2.30456	1.06502			2.30456	1.04635			2.30456	1.08328			2.30456	1.0413			2.30456	0.958005			2.30456	2.05175			2.30456	1.94598			2.30456	2.02075			2.30456	2.46437			2.30456	1.16621			2.30456	1.29315
		2.31118	1.06664			2.31118	1.06643			2.31118	1.04735			2.31118	1.08435			2.31118	1.04111			2.31118	0.957672			2.31118	2.05472			2.31118	1.94785			2.31118	2.02507			2.31118	2.46094			2.31118	1.1604			2.31118	1.29007
		2.31779	1.06704			2.31779	1.06705			2.31779	1.0477			2.31779	1.08464			2.31779	1.04265			2.31779	0.957673			2.31779	2.05757			2.31779	1.95273			2.31779	2.03157			2.31779	2.47083			2.31779	1.16174			2.31779	1.2884
		2.32441	1.06723			2.32441	1.06747			2.32441	1.0476			2.32441	1.08494			2.32441	1.04429			2.32441	0.95928			2.32441	2.06378			2.32441	1.95326			2.32441	2.03848			2.32441	2.47866			2.32441	1.16177			2.32441	1.28822
		2.33102	1.0675			2.33102	1.06752			2.33102	1.04794			2.33102	1.08529			2.33102	1.04567			2.33102	0.960703			2.33102	2.06663			2.33102	1.95454			2.33102	2.03444			2.33102	2.47038			2.33102	1.16376			2.33102	1.28935
		2.33764	1.0686			2.33764	1.06833			2.33764	1.049			2.33764	1.08663			2.33764	1.04561			2.33764	0.95865			2.33764	2.0695			2.33764	1.9696			2.33764	2.05801			2.33764	2.50011			2.33764	1.16433			2.33764	1.29137
		2.34426	1.0681			2.34426	1.06753			2.34426	1.04876			2.34426	1.08611			2.34426	1.04542			2.34426	0.961191			2.34426	2.07256			2.34426	1.95349			2.34426	2.04337			2.34426	2.4902			2.34426	1.16405			2.34426	1.2941
		2.35087	1.06858			2.35087	1.06765			2.35087	1.04963			2.35087	1.08646			2.35087	1.04609			2.35087	0.960983			2.35087	2.07801			2.35087	1.95967			2.35087	2.0503			2.35087	2.49509			2.35087	1.16297			2.35087	1.29549
		2.35749	1.06865			2.35749	1.06772			2.35749	1.04938			2.35749	1.08684			2.35749	1.04629			2.35749	0.959713			2.35749	2.07841			2.35749	1.96386			2.35749	2.06112			2.35749	2.48689			2.35749	1.1639			2.35749	1.29511
		2.36411	1.06922			2.36411	1.06861			2.36411	1.0497			2.36411	1.0874			2.36411	1.04742			2.36411	0.959921			2.36411	2.0809			2.36411	1.97902			2.36411	2.07385			2.36411	2.47046			2.36411	1.16302			2.36411	1.29577
		2.37072	1.06891			2.37072	1.0684			2.37072	1.04965			2.37072	1.08679			2.37072	1.04907			2.37072	0.959423			2.37072	2.08163			2.37072	1.9697			2.37072	2.06719			2.37072	2.48704			2.37072	1.16386			2.37072	1.29462
		2.37734	1.06947			2.37734	1.06893			2.37734	1.05002			2.37734	1.08754			2.37734	1.04919			2.37734	0.960176			2.37734	2.07834			2.37734	1.97103			2.37734	2.05876			2.37734	2.47804			2.37734	1.16493			2.37734	1.29403
		2.38396	1.06931			2.38396	1.0687			2.38396	1.04972			2.38396	1.08755			2.38396	1.04911			2.38396	0.960164			2.38396	2.0748			2.38396	1.96841			2.38396	2.05648			2.38396	2.47584			2.38396	1.16523			2.38396	1.29286
		2.39058	1.06991			2.39058	1.06888			2.39058	1.05095			2.39058	1.08788			2.39058	1.04812			2.39058	0.957475			2.39058	2.07089			2.39058	1.95109			2.39058	2.04061			2.39058	2.47093			2.39058	1.16514			2.39058	1.29165
		2.3972	1.0693			2.3972	1.06785			2.3972	1.05064			2.3972	1.08728			2.3972	1.0466			2.3972	0.957716			2.3972	2.06525			2.3972	1.96352			2.3972	2.04419			2.3972	2.48096			2.3972	1.166			2.3972	1.29096
		2.40382	1.06919			2.40382	1.06774			2.40382	1.05035			2.40382	1.08734			2.40382	1.04658			2.40382	0.958446			2.40382	2.06455			2.40382	1.96313			2.40382	2.03484			2.40382	2.4648			2.40382	1.16696			2.40382	1.29041
		2.41044	1.06916			2.41044	1.06776			2.41044	1.05054			2.41044	1.08708			2.41044	1.04699			2.41044	0.957991			2.41044	2.06667			2.41044	1.94619			2.41044	2.02278			2.41044	2.46224			2.41044	1.16749			2.41044	1.28739
		2.41706	1.0698			2.41706	1.06912			2.41706	1.05053			2.41706	1.08781			2.41706	1.04623			2.41706	0.957711			2.41706	2.06551			2.41706	1.96672			2.41706	2.04785			2.41706	2.48181			2.41706	1.16874			2.41706	1.28752
		2.42368	1.07036			2.42368	1.06994			2.42368	1.05093			2.42368	1.08835			2.42368	1.04641			2.42368	0.960552			2.42368	2.0689			2.42368	1.96399			2.42368	2.04881			2.42368	2.4816			2.42368	1.17087			2.42368	1.28719
		2.4303	1.07109			2.4303	1.07105			2.4303	1.05109			2.4303	1.08931			2.4303	1.04676			2.4303	0.960975			2.4303	2.07756			2.4303	1.95749			2.4303	2.04364			2.4303	2.46036			2.4303	1.17134			2.4303	1.28774
		2.43692	1.07057			2.43692	1.0705			2.43692	1.05058			2.43692	1.08882			2.43692	1.04475			2.43692	0.961456			2.43692	2.07538			2.43692	1.97761			2.43692	2.05486			2.43692	2.48061			2.43692	1.17188			2.43692	1.2892
		2.44354	1.07114			2.44354	1.07119			2.44354	1.05079			2.44354	1.08962			2.44354	1.04424			2.44354	0.957409			2.44354	2.07596			2.44354	1.9808			2.44354	2.07518			2.44354	2.50546			2.44354	1.17291			2.44354	1.28934
		2.45017	1.07098			2.45017	1.0703			2.45017	1.05115			2.45017	1.08949			2.45017	1.04351			2.45017	0.960695			2.45017	2.07701			2.45017	1.95712			2.45017	2.03626			2.45017	2.46906			2.45017	1.17376			2.45017	1.28948
		2.45679	1.07106			2.45679	1.07032			2.45679	1.0511			2.45679	1.08974			2.45679	1.04431			2.45679	0.961701			2.45679	2.07376			2.45679	1.96403			2.45679	2.05604			2.45679	2.48076			2.45679	1.17373			2.45679	1.28791
		2.46341	1.07147			2.46341	1.07065			2.46341	1.05161			2.46341	1.0901			2.46341	1.04461			2.46341	0.957442			2.46341	2.06614			2.46341	1.96019			2.46341	2.04782			2.46341	2.47644			2.46341	1.1747			2.46341	1.28731
		2.47003	1.07199			2.47003	1.07095			2.47003	1.05246			2.47003	1.09048			2.47003	1.04586			2.47003	0.955229			2.47003	2.0651			2.47003	1.95445			2.47003	2.03863			2.47003	2.48591			2.47003	1.17527			2.47003	1.2842
		2.47666	1.07194			2.47666	1.07052			2.47666	1.05275			2.47666	1.09038			2.47666	1.04497			2.47666	0.957799			2.47666	2.05638			2.47666	1.94734			2.47666	2.03266			2.47666	2.46591			2.47666	1.17513			2.47666	1.2815
		2.48328	1.07243			2.48328	1.07117			2.48328	1.05308			2.48328	1.09091			2.48328	1.0435			2.48328	0.95709			2.48328	2.05222			2.48328	1.94496			2.48328	2.03811			2.48328	2.46473			2.48328	1.17483			2.48328	1.27953
		2.4899	1.07209			2.4899	1.07079			2.4899	1.0532			2.4899	1.09017			2.4899	1.0418			2.4899	0.956673			2.4899	2.04639			2.4899	1.92185			2.4899	2.00665			2.4899	2.44968			2.4899	1.17434			2.4899	1.27859
		2.49653	1.07097			2.49653	1.06934			2.49653	1.05232			2.49653	1.08908			2.49653	1.0409			2.49653	0.956068			2.49653	2.04342			2.49653	1.94149			2.49653	2.02535			2.49653	2.45395			2.49653	1.17424			2.49653	1.2746
		2.50312	1.07153			2.50312	1.06996			2.50312	1.0526			2.50312	1.08984			2.50312	1.04077			2.50312	0.956898			2.50312	2.04174			2.50312	1.92531			2.50312	2.01317			2.50312	2.44594			2.50312	1.17318			2.50312	1.27512
		2.50972	1.07156			2.50972	1.07			2.50972	1.05259			2.50972	1.0899			2.50972	1.0407			2.50972	0.952863			2.50972	2.03847			2.50972	1.93317			2.50972	2.02248			2.50972	2.43512			2.50972	1.17314			2.50972	1.27666
		2.51632	1.07175			2.51632	1.07026			2.51632	1.0528			2.51632	1.09003			2.51632	1.04222			2.51632	0.95566			2.51632	2.03695			2.51632	1.9409			2.51632	2.02403			2.51632	2.45955			2.51632	1.17272			2.51632	1.27649
		2.52292	1.07262			2.52292	1.07123			2.52292	1.05312			2.52292	1.09131			2.52292	1.04091			2.52292	0.957316			2.52292	2.03816			2.52292	1.91029			2.52292	1.99344			2.52292	2.40957			2.52292	1.17322			2.52292	1.27601
		2.52951	1.07398			2.52951	1.07295			2.52951	1.05427			2.52951	1.09263			2.52951	1.03962			2.52951	0.957291			2.52951	2.03968			2.52951	1.93547			2.52951	2.01705			2.52951	2.44322			2.52951	1.17284			2.52951	1.28102
		2.53611	1.07425			2.53611	1.07296			2.53611	1.05465			2.53611	1.09298			2.53611	1.03766			2.53611	0.955331			2.53611	2.03682			2.53611	1.93624			2.53611	2.01601			2.53611	2.44647			2.53611	1.17369			2.53611	1.28099
		2.54271	1.07527			2.54271	1.07397			2.54271	1.0555			2.54271	1.09416			2.54271	1.03721			2.54271	0.955652			2.54271	2.04314			2.54271	1.93769			2.54271	2.02923			2.54271	2.45487			2.54271	1.17399			2.54271	1.28054
		2.54931	1.07602			2.54931	1.07456			2.54931	1.05641			2.54931	1.09486			2.54931	1.03616			2.54931	0.957376			2.54931	2.04478			2.54931	1.92613			2.54931	2.01324			2.54931	2.43614			2.54931	1.17494			2.54931	1.28061
		2.55591	1.07669			2.55591	1.07495			2.55591	1.05737			2.55591	1.09546			2.55591	1.03546			2.55591	0.957211			2.55591	2.047			2.55591	1.93736			2.55591	2.0215			2.55591	2.46593			2.55591	1.17658			2.55591	1.2797
		2.56251	1.07691			2.56251	1.07505			2.56251	1.05766			2.56251	1.0957			2.56251	1.0343			2.56251	0.957716			2.56251	2.05389			2.56251	1.93778			2.56251	2.02722			2.56251	2.46358			2.56251	1.17869			2.56251	1.27604
		2.56911	1.07669			2.56911	1.07339			2.56911	1.05888			2.56911	1.09517			2.56911	1.03358			2.56911	0.955104			2.56911	2.0637			2.56911	1.94626			2.56911	2.02829			2.56911	2.45766			2.56911	1.17935			2.56911	1.27502
		2.57571	1.07667			2.57571	1.07339			2.57571	1.05865			2.57571	1.09533			2.57571	1.03385			2.57571	0.957744			2.57571	2.06659			2.57571	1.97025			2.57571	2.05968			2.57571	2.50683			2.57571	1.17966			2.57571	1.27507
		2.58231	1.07712			2.58231	1.07401			2.58231	1.05841			2.58231	1.09627			2.58231	1.03394			2.58231	0.959815			2.58231	2.06935			2.58231	1.97098			2.58231	2.06003			2.58231	2.50475			2.58231	1.18149			2.58231	1.27076
		2.58891	1.07634			2.58891	1.07259			2.58891	1.05779			2.58891	1.09578			2.58891	1.03482			2.58891	0.956214			2.58891	2.07522			2.58891	1.949			2.58891	2.03428			2.58891	2.49411			2.58891	1.18041			2.58891	1.27187
		2.59551	1.0772			2.59551	1.07306			2.59551	1.05882			2.59551	1.09676			2.59551	1.03645			2.59551	0.953861			2.59551	2.07524			2.59551	1.952			2.59551	2.03729			2.59551	2.48684			2.59551	1.17975			2.59551	1.27125
		2.60212	1.07893			2.60212	1.07624			2.60212	1.05933			2.60212	1.09861			2.60212	1.03904			2.60212	0.954189			2.60212	2.06734			2.60212	1.9682			2.60212	2.06184			2.60212	2.49777			2.60212	1.18165			2.60212	1.26786
		2.60872	1.07925			2.60872	1.0765			2.60872	1.06047			2.60872	1.09821			2.60872	1.03828			2.60872	0.955831			2.60872	2.06865			2.60872	1.97397			2.60872	2.05965			2.60872	2.49596			2.60872	1.1845			2.60872	1.26539
		2.61532	1.08063			2.61532	1.07831			2.61532	1.06183			2.61532	1.09933			2.61532	1.03782			2.61532	0.953325			2.61532	2.07231			2.61532	1.93347			2.61532	2.01874			2.61532	2.46451			2.61532	1.18647			2.61532	1.26749
		2.62192	1.08124			2.62192	1.07915			2.62192	1.06239			2.62192	1.09982			2.62192	1.03817			2.62192	0.955356			2.62192	2.07063			2.62192	1.95363			2.62192	2.04703			2.62192	2.48847			2.62192	1.18944			2.62192	1.26757
		2.62853	1.08235			2.62853	1.0803			2.62853	1.06333			2.62853	1.10108			2.62853	1.037			2.62853	0.952331			2.62853	2.07282			2.62853	1.97262			2.62853	2.06081			2.62853	2.48259			2.62853	1.19176			2.62853	1.26715
		2.63513	1.08402			2.63513	1.08203			2.63513	1.06439			2.63513	1.10324			2.63513	1.03414			2.63513	0.948365			2.63513	2.0746			2.63513	1.96123			2.63513	2.04293			2.63513	2.51578			2.63513	1.19035			2.63513	1.26635
		2.64174	1.08448			2.64174	1.08299			2.64174	1.06332			2.64174	1.10476			2.64174	1.03645			2.64174	0.946642			2.64174	2.06971			2.64174	1.98347			2.64174	2.06947			2.64174	2.51478			2.64174	1.19379			2.64174	1.26311
		2.64834	1.15965			2.64834	1.08168			2.64834	0.862239			2.64834	1.37467			2.64834	3.74011			2.64834	0.94907			2.64834	1.85333			2.64834	1.94343			2.64834	2.02661			2.64834	2.47307			2.64834	1.20007			2.64834	1.20962
		2.65495	1.23584			2.65495	1.08424			2.65495	0.650372			2.65495	1.86619			2.65495	9.93684			2.65495	0.951503			2.65495	1.6385			2.65495	1.93745			2.65495	2.01515			2.65495	2.46028			2.65495	1.49292			2.65495	1.14763
		2.80035	17985.8							2.80035	0.639841			2.80035	46663.5			2.80035	11.8652							2.80035	1.42549			2.80035	1											2.80035	2.9834			2.80035	1.08913
		2.80697	68160.5							2.80697	0.639093			2.80697	119428			2.80697	11.8159							2.80697	1.22103			2.80697	1											2.80697	4.35573			2.80697	1.13515
		2.81358	91284.8			2.81358	0.990958			2.81358	0.64008			2.81358	147464			2.81358	11.7624							2.81358	0.950006			2.81358	1.02985			2.81358	1.02985							2.81358	4.31191			2.81358	1.22395
		2.8202	113407							2.8202	6942.34			2.8202	169580			2.8202	9.0173							2.8202	0.889217			2.8202	0.96706			2.8202	1.03024			2.8202	1.23214			2.8202	4.25842			2.8202	1.31202
		2.82681	135870							2.82681	10341.9			2.82681	195368			2.82681	13787.1			2.82681	0.756714			2.82681	0.721501			2.82681	0.366535							2.82681	1.52896			2.82681	3.91907			2.82681	1.22601
		2.83343	156511							2.83343	13711.9			2.83343	194213			2.83343	13785.1			2.83343	0.775764			2.83343	0.521587			2.83343	0.641437			2.83343	0.990547							2.83343	2.39			2.83343	1.03962
		2.84004	109237							2.84004	21977.7			2.84004	121448			2.84004	13785.1			2.84004	0.784582			2.84004	0.315368			2.84004	0.274918											2.84004	0.986095			2.84004	0.7547
		2.84666	86112.4							2.84666	21977.7			2.84666	93412			2.84666	13785.1			2.84666	0.786903			2.84666	0.416171			2.84666	1.6e-05											2.84666	0.997034			2.84666	0.448735
		2.85328	63989.8			2.85328	1.02668			2.85328	15036.2			2.85328	71295.3			2.85328	13785.1			2.85328	0.783414			2.85328	0.51996			2.85328	1.6e-05											2.85328	1.01616			2.85328	0.385917
		2.85989	41526.9			2.85989	1.02581			2.85989	11636.8			2.85989	45507.2			2.85989	0.83643			2.85989	0.79282			2.85989	0.731964			2.85989	1.19632			2.85989	1.1399			2.85989	1.33933			2.85989	1.03155			2.85989	0.501629
		2.86651	2901.18			2.86651	1.02419			2.86651	8266.77			2.86651	1.02263			2.86651	0.840933			2.86651	0.7905			2.86651	0.725911			2.86651	1.23106			2.86651	1.15678			2.86651	1.33631			2.86651	1.04036			2.86651	0.701878
		2.87313	1.02332			2.87313	1.01995			2.87313	1.03036			2.87313	1.01923			2.87313	0.857068			2.87313	0.80214			2.87313	0.72591			2.87313	1.24247			2.87313	1.15511			2.87313	1.35116			2.87313	1.0424			2.87313	0.895396
		2.87975	1.01688			2.87975	1.01265			2.87975	1.02447			2.87975	1.01286			2.87975	0.877374			2.87975	0.808266			2.87975	0.487298			2.87975	1.6e-05											2.87975	1.04331			2.87975	1.07181
		2.88636	1.00905			2.88636	1.00491			2.88636	1.01624			2.88636	1.00535			2.88636	0.888819			2.88636	0.806184			2.88636	0.373422			2.88636	8e-06											2.88636	1.04011			2.88636	1.06622
		2.89298	1.00207			2.89298	0.999125			2.89298	1.00921			2.89298	0.997587			2.89298	0.893498			2.89298	0.811698			2.89298	0.193698			2.89298	1.9e-05											2.89298	1.04463			2.89298	0.843419
		2.8996	0.994456			2.8996	0.992478			2.8996	1.00203			2.8996	0.988914			2.8996	0.892708			2.8996	0.818869			2.8996	0.199748			2.8996	1.8e-05											2.8996	1.05081			2.8996	0.634183
		2.90622	0.988996			2.90622	0.987612			2.90622	0.996243			2.90622	0.983346			2.90622	0.890308			2.90622	0.823194			2.90622	4203.07			2.90622	1.8e-05											2.90622	1.0548			2.90622	0.429036
		2.91284	0.984645			2.91284	0.982734			2.91284	0.992142			2.91284	0.979127			2.91284	0.882759			2.91284	0.825086			2.91284	12577.2			2.91284	7e-06											2.91284	1.04972			2.91284	0.219675
		2.91946	0.981816			2.91946	0.978862			2.91946	0.990466			2.91946	0.975963			2.91946	0.877852			2.91946	0.8193			2.91946	12577.3			2.91946	1.23074							2.91946	1.36252			2.91946	1.0429			2.91946	3.6e-06
		2.92608	0.980672			2.92608	0.9764			2.92608	0.99049			2.92608	0.974657			2.92608	0.87282			2.92608	0.813876			2.92608	12577.5			2.92608	1.25542							2.92608	1.31528			2.92608	1.03173			2.92608	0.20335
		2.9327	0.982556			2.9327	0.978041			2.9327	0.993652			2.9327	0.975545			2.9327	0.872324			2.9327	0.81391			2.9327	12577.7			2.9327	1.21893			2.9327	1.10119			2.9327	1.25523			2.9327	1.02262			2.9327	0.402742
		2.93932	0.98519			2.93932	0.981728			2.93932	0.998083			2.93932	0.975821			2.93932	0.873732			2.93932	0.817546			2.93932	8375.08			2.93932	1.1972			2.93932	1.10917			2.93932	1.23758			2.93932	1.01973			2.93932	0.594272
		2.94595	0.987227			2.94595	0.986174			2.94595	1.00128			2.94595	0.975155			2.94595	0.872601			2.94595	0.81879			2.94595	537.317			2.94595	1.21747			2.94595	1.1576			2.94595	1.32709			2.94595	1.02332			2.94595	0.777652
		2.95257	0.988151			2.95257	0.989264			2.95257	1.00219			2.95257	0.974611			2.95257	0.865352			2.95257	0.825733			2.95257	537.303			2.95257	1.22271			2.95257	1.1804			2.95257	1.38416			2.95257	1.03205			2.95257	0.94822
		2.95919	0.985845			2.95919	0.987909			2.95919	0.999029			2.95919	0.972431			2.95919	0.856163			2.95919	0.829636			2.95919	537.281			2.95919	1.19256							2.95919	1.32309			2.95919	1.04391			2.95919	0.914811
		2.96581	0.982894			2.96581	0.984498			2.96581	0.994726			2.96581	0.971028			2.96581	0.845162			2.96581	0.828527			2.96581	537.253			2.96581	1.10995			2.96581	1.07224			2.96581	1.20434			2.96581	1.05202			2.96581	0.881624
		2.97244	0.980021			2.97244	0.979832			2.97244	0.991067			2.97244	0.970095			2.97244	0.834775			2.97244	0.820951			2.97244	1034.99			2.97244	1.06138			2.97244	1.02666			2.97244	1.1142			2.97244	1.05491			2.97244	0.878144
		2.97906	0.975911			2.97906	0.973862			2.97906	0.987629			2.97906	0.966645			2.97906	0.82521			2.97906	0.825077			2.97906	498.849			2.97906	1.06942			2.97906	1.04705			2.97906	1.1072			2.97906	1.05438			2.97906	0.895308
		2.98568	0.974094			2.98568	0.971189			2.98568	0.987256			2.98568	0.9641			2.98568	0.816053			2.98568	0.828584			2.98568	498.845			2.98568	1.1007							2.98568	1.13711			2.98568	1.05058			2.98568	0.934721
		2.99231	0.979169			2.99231	0.9766			2.99231	0.993474			2.99231	0.967903			2.99231	0.810426			2.99231	0.827228			2.99231	498.849			2.99231	1.10369			2.99231	1.09678			2.99231	1.15995			2.99231	1.04173			2.99231	0.972478
		2.99893	0.988468			2.99893	0.987164			2.99893	1.00244			2.99893	0.976636			2.99893	0.806204			2.99893	0.828328			2.99893	9669.62			2.99893	1.06929			2.99893	1.07665			2.99893	1.15107			2.99893	1.02965			2.99893	1.01417
		3.00556	0.995797			3.00556	0.995788			3.00556	1.0089			3.00556	0.983876			3.00556	0.797748			3.00556	0.828779			3.00556	19810			3.00556	1.05961			3.00556	1.07587			3.00556	1.14909			3.00556	1.02701			3.00556	1.03462
		3.01218	1.00278			3.01218	1.00331			3.01218	1.01505			3.01218	0.991243			3.01218	0.787281			3.01218	0.830933			3.01218	32122.4			3.01218	1.09302							3.01218	1.17838			3.01218	1.03523			3.01218	1.04841
		3.01881	1.00686			3.01881	1.00726			3.01881	1.01866			3.01881	0.995834			3.01881	0.786416			3.01881	0.828139			3.01881	41665.9			3.01881	1.16246							3.01881	1.2884			3.01881	13780.3			3.01881	1.04555
		3.02544	1.00455			3.02544	1.00408			3.02544	1.01676			3.02544	0.993747			3.02544	0.792582			3.02544	0.827755			3.02544	41665.9			3.02544	1.17055							3.02544	1.31695			3.02544	17195.4			3.02544	1.04423
		3.03206	0.996914			3.03206	0.99569			3.03206	1.00981			3.03206	0.986012			3.03206	0.797783			3.03206	0.825753			3.03206	32495.1			3.03206	1.13946							3.03206	1.2725			3.03206	20621.5			3.03206	1.04099
		3.03869	0.991006			3.03869	0.990043			3.03869	1.00316			3.03869	0.980605			3.03869	0.808482			3.03869	0.829941			3.03869	21857			3.03869	1.12144			3.03869	1.05961			3.03869	1.23245			3.03869	24066.4			3.03869	1.04908
		3.04532	0.989569			3.04532	0.989561			3.04532	0.999304			3.04532	0.980714			3.04532	0.823034			3.04532	0.835335			3.04532	9544.6			3.04532	1.129			3.04532	1.07425			3.04532	1.29122			3.04532	37934.4			3.04532	1.05967
		3.05195	0.991049			3.05195	0.991476			3.05195	0.998159			3.05195	0.984284			3.05195	0.827521			3.05195	0.839529			3.05195	1.08859			3.05195	1.09885			3.05195	1.07535			3.05195	1.25681			3.05195	24155.2			3.05195	1.08591
		3.05857	0.993583			3.05857	0.993923			3.05857	0.999554			3.05857	0.987914			3.05857	0.823364			3.05857	0.850385			3.05857	1.07972			3.05857	1.04278			3.05857	1.06391			3.05857	1.09056			3.05857	20740			3.05857	1.11045
		3.0652	0.99497			3.0652	0.994713			3.0652	1.00176			3.0652	0.988963			3.0652	0.818012			3.0652	0.850373			3.0652	1.07343			3.0652	1.02444			3.0652	1.058			3.0652	0.982436			3.0652	17314			3.0652	1.13235
		3.07183	0.994795			3.07183	0.993442			3.07183	1.0035			3.07183	0.987794			3.07183	0.81064			3.07183	0.846476			3.07183	1.07291			3.07183	1.07766			3.07183	1.07986			3.07183	0.996663			3.07183	13869.1			3.07183	1.12084
		3.07846	0.993244			3.07846	0.991078			3.07846	1.00351			3.07846	0.985379			3.07846	0.801028			3.07846	0.83282			3.07846	0.861234			3.07846	1.1176			3.07846	1.08424			3.07846	1.07559			3.07846	1.08698			3.07846	1.0989
		3.08509	0.992564			3.08509	0.990563			3.08509	1.00338			3.08509	0.984084			3.08509	0.791128			3.08509	0.836501			3.08509	514.512			3.08509	1.12526			3.08509	1.08189			3.08509	1.13753			3.08509	1.07813			3.08509	1.06484
		3.09172	0.993332			3.09172	0.992337			3.09172	1.0028			3.09172	0.985397			3.09172	0.781202			3.09172	0.841868			3.09172	8659.24			3.09172	1.9e-05											3.09172	1.06533			3.09172	1.03671
		3.09835	0.99574			3.09835	0.995676			3.09835	1.00298			3.09835	0.989197			3.09835	0.77192			3.09835	0.846212			3.09835	15270.6			3.09835	1.22272							3.09835	1.25836			3.09835	1.05347			3.09835	1.02734
		3.10498	0.999044			3.10498	0.999327			3.10498	1.00504			3.10498	0.993389			3.10498	0.769302			3.10498	0.853472			3.10498	15270.5			3.10498	46241							3.10498	1.26723			3.10498	1.04218			3.10498	1.0361
		3.11161	1.00229			3.11161	1.00201			3.11161	1.00906			3.11161	0.996325			3.11161	0.772992			3.11161	0.851855			3.11161	34070.9			3.11161	28874							3.11161	1.33036			3.11161	1.04399			3.11161	1.03375
		3.11825	1.0019			3.11825	0.999897			3.11825	1.01051			3.11825	0.995434			3.11825	0.779082			3.11825	0.843565			3.11825	40640.4			3.11825	0.733074			3.11825	0.773115							3.11825	1.05335			3.11825	1.02302
		3.12488	0.999753			3.12488	0.995385			3.12488	1.01067			3.12488	0.992801			3.12488	0.786523			3.12488	0.845936			3.12488	39092.5			3.12488	61794.3											3.12488	1.05817			3.12488	110271
		3.13151	0.997612			3.13151	0.991198			3.13151	1.01077			3.13151	0.990022			3.13151	0.797218			3.13151	0.859027			3.13151	39575.2			3.13151	1.14205											3.13151	1.05538			3.13151	110271
		3.13814	0.996373			3.13814	0.989185			3.13814	1.01024			3.13814	0.988667			3.13814	0.805734			3.13814	0.868094			3.13814	51856.2			3.13814	1.16732							3.13814	1.0316			3.13814	1.04911			3.13814	110271
		3.14478	0.995728			3.14478	0.989228			3.14478	1.00824			3.14478	0.988787			3.14478	0.813474			3.14478	0.867589			3.14478	37323			3.14478	1.18295											3.14478	1.04287			3.14478	110271
		3.15141	0.99633			3.15141	0.990793			3.15141	1.00777			3.15141	0.989703			3.15141	0.823242			3.15141	0.861286			3.15141	30239.9			3.15141	1.18175											3.15141	1.03685			3.15141	208557
		3.15804	0.997558			3.15804	0.993043			3.15804	1.00814			3.15804	0.991018			3.15804	0.828493			3.15804	0.869665			3.15804	23643.1			3.15804	1.17278							3.15804	1.17219			3.15804	1.03272			3.15804	98287.2
		3.16468	0.999305			3.16468	0.996207			3.16468	1.00849			3.16468	0.99306			3.16468	0.826983			3.16468	0.880861			3.16468	16549			3.16468	1.14437			3.16468	1.08413			3.16468	1.231			3.16468	1.03345			3.16468	170272
		3.17131	1.00064			3.17131	0.99871			3.17131	1.00881			3.17131	0.994538			3.17131	0.822911			3.17131	0.881913			3.17131	4268.07			3.17131	1.16029			3.17131	1.11033			3.17131	1.26102			3.17131	1.03913			3.17131	170272
		3.17795	1.00192			3.17795	1.00065			3.17795	1.01037			3.17795	0.995091			3.17795	0.819009			3.17795	0.886066			3.17795	1.19901			3.17795	1.18558			3.17795	1.14225			3.17795	1.29203			3.17795	1.04697			3.17795	170272
		3.18458	1.00364			3.18458	1.00342			3.18458	1.01213			3.18458	0.996052			3.18458	0.816804			3.18458	0.884266			3.18458	1.22693			3.18458	1.24423			3.18458	1.20646			3.18458	1.35097			3.18458	1.05218			3.18458	71985.5
		3.19122	1.00571			3.19122	1.00649			3.19122	1.01401			3.19122	0.997624			3.19122	0.822825			3.19122	0.87998			3.19122	1.24657			3.19122	1.27842			3.19122	1.24233			3.19122	1.42046			3.19122	1.05207			3.19122	135849
		3.19785	1.00564			3.19785	1.00665			3.19785	1.01439			3.19785	0.996997			3.19785	0.836679			3.19785	0.880133			3.19785	1.26397			3.19785	1.2555			3.19785	1.23361			3.19785	1.42991			3.19785	1.04872			3.19785	63864.2
		3.20449	1.00451			3.20449	1.00497			3.20449	1.01375			3.20449	0.995783			3.20449	0.84783			3.20449	0.879122			3.20449	1.2715			3.20449	1.22851			3.20449	1.21684			3.20449	1.42747			3.20449	1.04862			3.20449	63864
		3.21113	1.00315			3.21113	1.00244			3.21113	1.01238			3.21113	0.99523			3.21113	0.852576			3.21113	0.879828			3.21113	1.27913			3.21113	1.24867			3.21113	1.2375			3.21113	1.42887			3.21113	1.04876			3.21113	63864
		3.21776	1.00232			3.21776	0.999931			3.21776	1.01093			3.21776	0.996103			3.21776	0.850132			3.21776	0.889551			3.21776	1.29509			3.21776	1.2705			3.21776	1.24937			3.21776	1.40858			3.21776	1.04803			3.21776	63864
		3.2244	1.00128			3.2244	0.997275			3.2244	1.00895			3.2244	0.997031			3.2244	0.843233			3.2244	0.897115			3.2244	1.31585			3.2244	1.32082			3.2244	1.29341			3.2244	1.40737			3.2244	1.05045			3.2244	0.440982
		3.23104	1.00201			3.23104	0.996609			3.23104	1.00852			3.23104	0.99977			3.23104	0.833919			3.23104	0.899086			3.23104	1.32682			3.23104	1.34883			3.23104	1.32542			3.23104	1.43249			3.23104	1.0565			3.23104	0.665923
		3.23768	1.00413			3.23768	0.998028			3.23768	1.00952			3.23768	1.00339			3.23768	0.830653			3.23768	0.896422			3.23768	1.33208			3.23768	1.3488			3.23768	1.33442			3.23768	1.43962			3.23768	1.06107			3.23768	0.889128
		3.24432	1.00669			3.24432	1.00051			3.24432	1.01115			3.24432	1.00686			3.24432	0.830931			3.24432	0.891798			3.24432	1.32599			3.24432	1.31411			3.24432	1.30696			3.24432	1.40794			3.24432	1.06018			3.24432	0.893558
		3.25096	1.00845			3.25096	1.00278			3.25096	1.01269			3.25096	1.00847			3.25096	0.83223			3.25096	0.891757			3.25096	1.31378			3.25096	1.28886			3.25096	1.29105			3.25096	1.41433			3.25096	1.06022			3.25096	0.891925
		3.2576	1.00979			3.2576	1.00523			3.2576	1.01423			3.2576	1.00887			3.2576	0.831805			3.2576	0.895019			3.2576	1.30125			3.2576	1.2715			3.2576	1.27016			3.2576	1.41435			3.2576	1.05851			3.2576	1.10646
		3.26424	1.01018			3.26424	1.00677			3.26424	1.01526			3.26424	1.0079			3.26424	0.831602			3.26424	0.901051			3.26424	1.29578			3.26424	1.26376			3.26424	1.26667			3.26424	1.43922			3.26424	1.05786			3.26424	1.09089
		3.27088	1.00951			3.27088	1.00702			3.27088	1.01533			3.27088	1.00593			3.27088	0.829982			3.27088	0.903018			3.27088	1.29607			3.27088	1.26658			3.27088	1.2723			3.27088	1.43585			3.27088	1.05395			3.27088	1.07422
		3.27752	1.00791			3.27752	1.00581			3.27752	1.01424			3.27752	1.00358			3.27752	0.831225			3.27752	0.900135			3.27752	1.30418			3.27752	1.2697			3.27752	1.27879			3.27752	1.43599			3.27752	1.05558			3.27752	1.06272
		3.28416	1.00592			3.28416	1.00302			3.28416	1.01257			3.28416	1.00184			3.28416	0.836781			3.28416	0.897528			3.28416	1424.6			3.28416	1.28511			3.28416	1.28644			3.28416	1.44957			3.28416	1.05952			3.28416	1.05976
		3.2908	1.00376			3.2908	0.999003			3.2908	1.0109			3.2908	1.00051			3.2908	0.844052			3.2908	0.898349			3.2908	4212			3.2908	1.32033			3.2908	1.29611			3.2908	1.47234			3.2908	1.06716			3.2908	1.07115
		3.29744	1.00235			3.29744	0.99598			3.29744	1.00991			3.29744	0.999819			3.29744	0.849548			3.29744	0.895461			3.29744	6893.5			3.29744	16162.2			3.29744	1.30058			3.29744	1.49489			3.29744	1.07047			3.29744	1.09316
		3.30408	1.00231			3.30408	0.995345			3.30408	1.00977			3.30408	1.00029			3.30408	0.852283			3.30408	0.896529			3.30408	9497.63			3.30408	31650.9			3.30408	1.30368			3.30408	1.52183			3.30408	1.07554			3.30408	1.11117
		3.31073	1.00346			3.31073	0.997589			3.31073	1.01038			3.31073	1.00118			3.31073	0.853225			3.31073	0.900675			3.31073	12680.5			3.31073	30448.6			3.31073	1.28415			3.31073	1.50822			3.31073	1.07922			3.31073	1.12054
		3.31737	1.00532			3.31737	1.00297			3.31737	1.01101			3.31737	1.00174			3.31737	0.8534			3.31737	0.902919			3.31737	11257.2			3.31737	29570.1			3.31737	1.25494			3.31737	1.50028			3.31737	1.08302			3.31737	1.1221
		3.32401	1.00725			3.32401	1.00961			3.32401	1.01122			3.32401	1.00202			3.32401	0.853367			3.32401	0.904955			3.32401	8469.81			3.32401	36141.5			3.32401	1.22797			3.32401	1.49619			3.32401	1.08466			3.32401	1.11333
		3.33066	1.00822			3.33066	1.01473			3.33066	1.01062			3.33066	1.00157			3.33066	0.851839			3.33066	0.904814			3.33066	5788.32			3.33066	1.24446			3.33066	1.22285			3.33066	1.50628			3.33066	1.08784			3.33066	1.08825
		3.3373	1.00764			3.3373	1.01652			3.3373	1.00893			3.3373	1.0004			3.3373	0.850491			3.3373	0.905275			3.3373	3184.21			3.3373	1.30337			3.3373	1.26922			3.3373	1.57314			3.3373	1.09085			3.3373	1.07092
		3.34395	1.00605			3.34395	1.01534			3.34395	1.00661			3.34395	0.999186			3.34395	0.846683			3.34395	0.906912			3.34395	1.35367			3.34395	1.34784			3.34395	1.31953			3.34395	1.61297			3.34395	1.09333			3.34395	1.06308
		3.35059	1.00454			3.35059	1.01231			3.35059	1.00528			3.35059	0.998545			3.35059	0.84069			3.35059	0.906665			3.35059	1.37251			3.35059	1.36871			3.35059	1.36195			3.35059	1.6256			3.35059	1.09488			3.35059	1.05499
		3.35724	1.00355			3.35724	1.0092			3.35724	1.00511			3.35724	0.998259			3.35724	0.834458			3.35724	0.904808			3.35724	1.38303			3.35724	1.34963			3.35724	1.36465			3.35724	1.6047			3.35724	1.09888			3.35724	1.04968
		3.36388	1.00391			3.36388	1.00802			3.36388	1.00589			3.36388	0.999294			3.36388	0.832625			3.36388	0.900516			3.36388	1.39867			3.36388	1.32066			3.36388	1.34156			3.36388	1.58451			3.36388	1.1006			3.36388	1.06203
		3.37053	1.00586			3.37053	1.00951			3.37053	1.00821			3.37053	1.00123			3.37053	0.83263			3.37053	0.901322			3.37053	1.41981			3.37053	1.33678			3.37053	1.3416			3.37053	1.62715			3.37053	1.09915			3.37053	1.0714
		3.37717	1.00817			3.37717	1.01176			3.37717	1.01112			3.37717	1.00302			3.37717	0.833408			3.37717	0.906331			3.37717	1.44506			3.37717	1.41406			3.37717	1.40418			3.37717	1.70906			3.37717	1.09598			3.37717	1.07355
		3.38382	1.00996			3.38382	1.01368			3.38382	1.01298			3.38382	1.00465			3.38382	0.83415			3.38382	0.906437			3.38382	1.4731			3.38382	1.48087			3.38382	1.45851			3.38382	1.73816			3.38382	1.09464			3.38382	1.08439
		3.39047	1.01146			3.39047	1.01514			3.39047	1.01427			3.39047	1.00637			3.39047	0.835294			3.39047	0.903792			3.39047	1.49922			3.39047	1.49429			3.39047	1.47106			3.39047	1.7324			3.39047	1.0951			3.39047	1.08777
		3.39712	1.01226			3.39712	1.0156			3.39712	1.01495			3.39712	1.00754			3.39712	0.835346			3.39712	0.902031			3.39712	1.50678			3.39712	1.48189			3.39712	1.46968			3.39712	1.69484			3.39712	1.09956			3.39712	1.07328
		3.40376	1.0122			3.40376	1.01492			3.40376	1.01471			3.40376	1.00804			3.40376	0.835917			3.40376	0.903805			3.40376	1.50128			3.40376	1.47282			3.40376	1.48357			3.40376	1.70768			3.40376	1.10574			3.40376	1.05816
		3.41041	1.01199			3.41041	1.01448			3.41041	1.01375			3.41041	1.00869			3.41041	0.837212			3.41041	0.907434			3.41041	1.48768			3.41041	1.44555			3.41041	1.46591			3.41041	1.69584			3.41041	1.11055			3.41041	1.0555
		3.41706	1.01169			3.41706	1.01458			3.41706	1.01272			3.41706	1.00879			3.41706	0.839789			3.41706	0.906394			3.41706	1.47837			3.41706	1.43582			3.41706	1.45515			3.41706	1.69441			3.41706	1.11309			3.41706	1.05715
		3.42371	1.01089			3.42371	1.01451			3.42371	1.01144			3.42371	1.00791			3.42371	0.843105			3.42371	0.902951			3.42371	1.4743			3.42371	1.40855			3.42371	1.42571			3.42371	1.65271			3.42371	1.1145			3.42371	1.06698
		3.43036	1.00996			3.43036	1.01373			3.43036	1.01016			3.43036	1.00721			3.43036	0.848048			3.43036	0.899882			3.43036	1.47631			3.43036	1.41903			3.43036	1.43718			3.43036	1.65735			3.43036	1.11533			3.43036	1.08291
		3.43701	1.009			3.43701	1.01226			3.43701	1.00922			3.43701	1.00656			3.43701	0.853231			3.43701	0.902434			3.43701	1.47643			3.43701	1.44571			3.43701	1.4636			3.43701	1.70738			3.43701	1.11522			3.43701	1.10258
		3.44366	1.00847			3.44366	1.01102			3.44366	1.00914			3.44366	1.00613			3.44366	0.857889			3.44366	0.903488			3.44366	1.47921			3.44366	1.45024			3.44366	1.46703			3.44366	1.74878			3.44366	1.11562			3.44366	1.11593
		3.45031	1.00812			3.45031	1.00965			3.45031	1.0097			3.45031	1.00564			3.45031	0.861303			3.45031	0.900341			3.45031	1.48277			3.45031	1.43864			3.45031	1.44858			3.45031	1.70927			3.45031	1.11587			3.45031	1.11888
		3.45696	1.0084			3.45696	1.00922			3.45696	1.01059			3.45696	1.00585			3.45696	0.862521			3.45696	0.897018			3.45696	1.49184			3.45696	1.42559			3.45696	1.43271			3.45696	1.67701			3.45696	1.11375			3.45696	1.11939
		3.46361	1.0087			3.46361	1.00966			3.46361	1.01125			3.46361	1.00572			3.46361	0.860825			3.46361	0.90107			3.46361	1.50239			3.46361	1.43383			3.46361	1.44967			3.46361	1.70017			3.46361	1.11098			3.46361	1.12035
		3.47026	1.00988			3.47026	1.0117			3.47026	1.0121			3.47026	1.00662			3.47026	0.857866			3.47026	0.904111			3.47026	1.51247			3.47026	1.48531			3.47026	1.50775			3.47026	1.77406			3.47026	1.10923			3.47026	1.12175
		3.47692	1.01123			3.47692	1.01372			3.47692	1.01301			3.47692	1.0079			3.47692	0.855023			3.47692	0.902795			3.47692	1.52383			3.47692	1.50749			3.47692	1.52025			3.47692	1.78602			3.47692	1.10873			3.47692	1.1244
		3.48357	1.01231			3.48357	1.01519			3.48357	1.01357			3.48357	1.00919			3.48357	0.852103			3.48357	0.899493			3.48357	1.53301			3.48357	1.48882			3.48357	1.49587			3.48357	1.76954			3.48357	1.10745			3.48357	1.12651
		3.49022	1.01303			3.49022	1.01586			3.49022	1.01387			3.49022	1.01033			3.49022	0.850529			3.49022	0.899685			3.49022	1.53585			3.49022	1.47723			3.49022	1.48889			3.49022	1.75181			3.49022	1.10735			3.49022	1.12606
		3.49687	1.01382			3.49687	1.0163			3.49687	1.01445			3.49687	1.01155			3.49687	0.850759			3.49687	0.902616			3.49687	1.53907			3.49687	1.47477			3.49687	1.4994			3.49687	1.75016			3.49687	1.10867			3.49687	1.12891
		3.50353	1.01363			3.50353	1.01563			3.50353	1.01467			3.50353	1.01131			3.50353	0.852406			3.50353	0.901196			3.50353	1.54945			3.50353	1.49006			3.50353	1.53263			3.50353	1.78598			3.50353	1.1105			3.50353	1.136
		3.51018	1.01298			3.51018	1.01457			3.51018	1.01458			3.51018	1.01043			3.51018	0.855329			3.51018	0.896713			3.51018	1.56684			3.51018	1.49601			3.51018	1.55688			3.51018	1.82719			3.51018	1.11174			3.51018	1.14709
		3.51684	1.01283			3.51684	1.01441			3.51684	1.01446			3.51684	1.01026			3.51684	0.858177			3.51684	0.897987			3.51684	1.5833			3.51684	1.51805			3.51684	1.56448			3.51684	1.84255			3.51684	1.11245			3.51684	1.16542
		3.52349	1.01246			3.52349	1.01432			3.52349	1.01372			3.52349	1.01004			3.52349	0.860066			3.52349	0.90235			3.52349	1.58889			3.52349	1.55011			3.52349	1.5751			3.52349	1.88466			3.52349	1.11242			3.52349	1.18247
		3.53015	1.01154			3.53015	1.01383			3.53015	1.01243			3.53015	1.00916			3.53015	0.860704			3.53015	0.902819			3.53015	1.58888			3.53015	1.56031			3.53015	1.55915			3.53015	1.88855			3.53015	1.11079			3.53015	1.19285
		3.5368	1.01031			3.5368	1.01289			3.5368	1.01097			3.5368	1.00793			3.5368	0.859506			3.5368	0.905776			3.5368	1.58218			3.5368	1.53073			3.5368	1.53234			3.5368	1.85759			3.5368	1.10951			3.5368	1.1923
		3.54346	1.00872			3.54346	1.01129			3.54346	1.00925			3.54346	1.00648			3.54346	0.856405			3.54346	0.908179			3.54346	1.55854			3.54346	1.51587			3.54346	1.5291			3.54346	1.84695			3.54346	1.10889			3.54346	1.17857
		3.55011	1.00722			3.55011	1.00939			3.55011	1.00739			3.55011	1.00557			3.55011	0.853517			3.55011	0.907075			3.55011	1.52248			3.55011	1.4995			3.55011	1.51979			3.55011	1.79576			3.55011	1.10882			3.55011	1.15804
		3.55677	1.00625			3.55677	1.00781			3.55677	1.00656			3.55677	1.0049			3.55677	0.852476			3.55677	0.904716			3.55677	1.50413			3.55677	1.44466			3.55677	1.46418			3.55677	1.70536			3.55677	1.10926			3.55677	1.14655
		3.56343	1.00641			3.56343	1.00769			3.56343	1.00666			3.56343	1.0053			3.56343	0.852032			3.56343	0.903424			3.56343	1.50596			3.56343	1.38338			3.56343	1.40262			3.56343	1.62796			3.56343	1.10831			3.56343	1.14634
		3.57008	1.00718			3.57008	1.00885			3.57008	1.00677			3.57008	1.00642			3.57008	0.852646			3.57008	0.90416			3.57008	1.51821			3.57008	1.43882			3.57008	1.45587			3.57008	1.72164			3.57008	1.10679			3.57008	1.15523
		3.57674	1.0081			3.57674	1.00995			3.57674	1.00678			3.57674	1.00803			3.57674	0.853395			3.57674	0.907322			3.57674	1.54313			3.57674	1.5286			3.57674	1.54401			3.57674	1.82789			3.57674	1.10501			3.57674	1.16817
		3.5834	1.0087			3.5834	1.01028			3.5834	1.00754			3.5834	1.00867			3.5834	0.855099			3.5834	0.904685			3.5834	1.58536			3.5834	1.55687			3.5834	1.5793			3.5834	1.87417			3.5834	1.1039			3.5834	1.17655
		3.59006	1.00899			3.59006	1.01008			3.59006	1.00848			3.59006	1.0087			3.59006	0.855403			3.59006	0.902623			3.59006	1.61877			3.59006	1.55523			3.59006	1.59191			3.59006	1.86421			3.59006	1.1046			3.59006	1.17669
		3.59672	1.00904			3.59672	1.00934			3.59672	1.00967			3.59672	1.00826			3.59672	0.854838			3.59672	0.903736			3.59672	1.63481			3.59672	1.57763			3.59672	1.62201			3.59672	1.86746			3.59672	1.10603			3.59672	1.17191
		3.60338	1.00922			3.60338	1.00825			3.60338	1.01153			3.60338	1.00778			3.60338	0.853945			3.60338	0.90285			3.60338	1.64111			3.60338	1.60041			3.60338	1.63133			3.60338	1.88068			3.60338	1.10795			3.60338	1.16286
		3.61004	1.00974			3.61004	1.00836			3.61004	1.01368			3.61004	1.00709			3.61004	0.854068			3.61004	0.899902			3.61004	1.64127			3.61004	1.60706			3.61004	1.63104			3.61004	1.89329			3.61004	1.10816			3.61004	1.15729
		3.6167	1.00976			3.6167	1.00884			3.6167	1.0145			3.6167	1.00609			3.6167	0.852989			3.6167	0.899758			3.6167	1.6277			3.6167	1.58666			3.6167	1.61255			3.6167	1.90614			3.6167	1.10828			3.6167	1.15473
		3.62336	1.00953			3.62336	1.00916			3.62336	1.01452			3.62336	1.00524			3.62336	0.851868			3.62336	0.908625			3.62336	1.60931			3.62336	1.554			3.62336	1.58229			3.62336	1.90179			3.62336	1.10613			3.62336	1.15406
		3.63002	1.00942			3.63002	1.0094			3.63002	1.01408			3.63002	1.0052			3.63002	0.851166			3.63002	0.913781			3.63002	1.59852			3.63002	1.5069			3.63002	1.54039			3.63002	1.84899			3.63002	1.1043			3.63002	1.15473
		3.63668	1.00813			3.63668	1.00858			3.63668	1.01167			3.63668	1.00459			3.63668	0.850629			3.63668	0.910549			3.63668	1.60225			3.63668	1.49652			3.63668	1.53751			3.63668	1.83127			3.63668	1.10392			3.63668	1.15928
		3.64334	1.00542			3.64334	1.00617			3.64334	1.00764			3.64334	1.00289			3.64334	0.850581			3.64334	0.905305			3.64334	1.61604			3.64334	1.5342			3.64334	1.58067			3.64334	1.88733			3.64334	1.10655			3.64334	1.16329
		3.65	1.0013			3.65	1.00203			3.65	1.00277			3.65	0.999459			3.65	0.850823			3.65	0.905251			3.65	1.63548			3.65	1.59786			3.65	1.6345			3.65	1.93819			3.65	1.11189			3.65	1.16881
		3.65667	0.99851			3.65667	0.99962			3.65667	0.999219			3.65667	0.997105			3.65667	0.850542			3.65667	0.908648			3.65667	1.65112			3.65667	1.63246			3.65667	1.65416			3.65667	1.93277			3.65667	1.11991			3.65667	1.1748
		3.66333	0.99682			3.66333	0.998736			3.66333	0.99708			3.66333	0.995272			3.66333	0.849491			3.66333	0.914438			3.66333	1.65708			3.66333	1.62113			3.66333	1.63642			3.66333	1.8969			3.66333	1.13015			3.66333	1.18444
		3.66999	0.996463			3.66999	0.999026			3.66999	0.996844			3.66999	0.994362			3.66999	0.84768			3.66999	0.917247			3.66999	1.65473			3.66999	1.59062			3.66999	1.61068			3.66999	1.8748			3.66999	1.1404			3.66999	1.19542
		3.67665	0.997473			3.67665	1.00047			3.67665	0.998146			3.67665	0.994807			3.67665	0.844646			3.67665	0.917042			3.67665	1.65307			3.67665	1.57438			3.67665	1.60648			3.67665	1.89671			3.67665	1.1478			3.67665	1.2022
		3.68332	1.00056			3.68332	1.00385			3.68332	1.00127			3.68332	0.997667			3.68332	0.840958			3.68332	0.911048			3.68332	1.65736			3.68332	1.58434			3.68332	1.62396			3.68332	1.92854			3.68332	1.14698			3.68332	1.2065
		3.68998	1.00292			3.68998	1.00624			3.68998	1.00374			3.68998	0.99991			3.68998	0.838055			3.68998	0.906419			3.68998	1.66224			3.68998	1.61456			3.68998	1.65521			3.68998	1.92661			3.68998	1.13986			3.68998	1.20864
		3.69665	1.00399			3.69665	1.00739			3.69665	1.00464			3.69665	1.00106			3.69665	0.835601			3.69665	0.906933			3.69665	1.66156			3.69665	1.6265			3.69665	1.66867			3.69665	1.93659			3.69665	1.1302			3.69665	1.20364
		3.70331	1.00476			3.70331	1.00855			3.70331	1.00496			3.70331	1.00197			3.70331	0.832389			3.70331	0.906175			3.70331	1.65923			3.70331	1.60176			3.70331	1.63935			3.70331	1.92772			3.70331	1.11935			3.70331	1.19197
		3.70998	1.00569			3.70998	1.00997			3.70998	1.00549			3.70998	1.00295			3.70998	0.829213			3.70998	0.90739			3.70998	1.65863			3.70998	1.56921			3.70998	1.60598			3.70998	1.89003			3.70998	1.11003			3.70998	1.1813
		3.71664	1.00688			3.71664	1.01142			3.71664	1.00628			3.71664	1.00433			3.71664	0.827282			3.71664	0.907838			3.71664	1.65534			3.71664	1.57551			3.71664	1.61562			3.71664	1.8986			3.71664	1.10672			3.71664	1.17574
		3.72331	1.00808			3.72331	1.01261			3.72331	1.00703			3.72331	1.00595			3.72331	0.825801			3.72331	0.90811			3.72331	1.64633			3.72331	1.60732			3.72331	1.6502			3.72331	1.94251			3.72331	1.10675			3.72331	1.17855
		3.72998	1.00931			3.72998	1.01348			3.72998	1.00806			3.72998	1.00759			3.72998	0.824046			3.72998	0.900917			3.72998	1.63993			3.72998	1.60682			3.72998	1.64684			3.72998	1.94619			3.72998	1.10588			3.72998	1.18905
		3.73664	1.01047			3.73664	1.01398			3.73664	1.00935			3.73664	1.00908			3.73664	0.823163			3.73664	0.898652			3.73664	1.6273			3.73664	1.55886			3.73664	1.59249			3.73664	1.88132			3.73664	1.10411			3.73664	1.20076
		3.74331	1.01136			3.74331	1.01416			3.74331	1.01052			3.74331	1.01019			3.74331	0.821828			3.74331	0.897786			3.74331	1.60841			3.74331	1.54815			3.74331	1.57456			3.74331	1.82216			3.74331	1.1031			3.74331	1.20751
		3.74998	1.01145			3.74998	1.01396			3.74998	1.01088			3.74998	1.01024			3.74998	0.822021			3.74998	0.89938			3.74998	1.59461			3.74998	1.53092			3.74998	1.55048			3.74998	1.78388			3.74998	1.10284			3.74998	1.21166
		3.75665	1.01087			3.75665	1.01364			3.75665	1.01035			3.75665	1.00944			3.75665	0.825044			3.75665	0.898199			3.75665	1.59517			3.75665	1.53535			3.75665	1.54641			3.75665	1.80593			3.75665	1.10305			3.75665	1.20981
		3.76331	1.01056			3.76331	1.01368			3.76331	1.00979			3.76331	1.00914			3.76331	0.831817			3.76331	0.894633			3.76331	1.60255			3.76331	1.54978			3.76331	1.56575			3.76331	1.87559			3.76331	1.10358			3.76331	1.20746
		3.76998	1.01068			3.76998	1.01411			3.76998	1.00955			3.76998	1.00938			3.76998	0.837581			3.76998	0.893096			3.76998	1.61597			3.76998	1.55904			3.76998	1.58605			3.76998	1.91943			3.76998	1.10436			3.76998	1.20404
		3.77665	1.01099			3.77665	1.01466			3.77665	1.00962			3.77665	1.00971			3.77665	0.839435			3.77665	0.893745			3.77665	1.62338			3.77665	1.56679			3.77665	1.60163			3.77665	1.94455			3.77665	1.10371			3.77665	1.20541
		3.78332	1.01131			3.78332	1.0149			3.78332	1.00994			3.78332	1.01009			3.78332	0.836413			3.78332	0.892534			3.78332	1.61836			3.78332	1.56927			3.78332	1.61208			3.78332	1.95638			3.78332	1.10045			3.78332	1.20552
		3.78999	1.01123			3.78999	1.01435			3.78999	1.01004			3.78999	1.01018			3.78999	0.829751			3.78999	0.893657			3.78999	1.61084			3.78999	1.53904			3.78999	1.59207			3.78999	1.92083			3.78999	1.09618			3.78999	1.20533
		3.79666	1.01016			3.79666	1.01287			3.79666	1.00918			3.79666	1.00919			3.79666	0.81775			3.79666	0.888564			3.79666	1.59738			3.79666	1.50047			3.79666	1.56137			3.79666	1.86485			3.79666	1.0922			3.79666	1.20076
		3.80333	1.00868			3.80333	1.01097			3.80333	1.00781			3.80333	1.0079			3.80333	0.804863			3.80333	0.888208			3.80333	1.57969			3.80333	1.50393			3.80333	1.57016			3.80333	1.87209			3.80333	1.08872			3.80333	1.19591
		3.81	1.00717			3.81	1.00891			3.81	1.00649			3.81	1.00659			3.81	0.796608			3.81	0.889164			3.81	1.56689			3.81	1.49116			3.81	1.55345			3.81	1.84695			3.81	1.08587			3.81	1.19396
		3.81667	1.00609			3.81667	1.00766			3.81667	1.00532			3.81667	1.00572			3.81667	0.791506			3.81667	0.883016			3.81667	1.56011			3.81667	1.48571			3.81667	1.53663			3.81667	1.81458			3.81667	1.08305			3.81667	1.19761
		3.82335	1.00562			3.82335	1.0074			3.82335	1.00457			3.82335	1.00536			3.82335	0.787647			3.82335	0.878724			3.82335	1.54599			3.82335	1.49032			3.82335	1.52972			3.82335	1.80475			3.82335	1.08035			3.82335	1.20531
		3.83002	1.00635			3.83002	1.00848			3.83002	1.00498			3.83002	1.00613			3.83002	0.785124			3.83002	0.882572			3.83002	1.53075			3.83002	1.48607			3.83002	1.51984			3.83002	1.79263			3.83002	1.07823			3.83002	1.20832
		3.83669	1.00725			3.83669	1.00972			3.83669	1.0058			3.83669	1.00689			3.83669	0.783661			3.83669	0.88554			3.83669	1.5182			3.83669	1.45168			3.83669	1.49414			3.83669	1.76072			3.83669	1.07708			3.83669	1.21194
		3.84336	1.00765			3.84336	1.0106			3.84336	1.00597			3.84336	1.00716			3.84336	0.782135			3.84336	0.87767			3.84336	1.51184			3.84336	1.42483			3.84336	1.47505			3.84336	1.74665			3.84336	1.07677			3.84336	1.21578
		3.85004	1.00805			3.85004	1.01146			3.85004	1.00611			3.85004	1.00749			3.85004	0.780553			3.85004	0.879346			3.85004	1.5099			3.85004	1.42951			3.85004	1.47816			3.85004	1.71896			3.85004	1.077			3.85004	1.21728
		3.85671	1.00871			3.85671	1.01208			3.85671	1.00694			3.85671	1.00801			3.85671	0.778076			3.85671	0.882198			3.85671	1.50924			3.85671	1.46484			3.85671	1.50765			3.85671	1.72486			3.85671	1.07817			3.85671	1.21531
		3.86339	1.00868			3.86339	1.01151			3.86339	1.00773			3.86339	1.00761			3.86339	0.776154			3.86339	0.882665			3.86339	1.5012			3.86339	1.48427			3.86339	1.51993			3.86339	1.72946			3.86339	1.08025			3.86339	1.2193
		3.87006	1.00809			3.87006	1.01014			3.87006	1.00848			3.87006	1.00634			3.87006	0.776212			3.87006	0.879166			3.87006	1.47849			3.87006	1.46038			3.87006	1.49049			3.87006	1.72161			3.87006	1.08321			3.87006	1.22497
		3.87673	1.0077			3.87673	1.00899			3.87673	1.00986			3.87673	1.00486			3.87673	0.775897			3.87673	0.886302			3.87673	1.45586			3.87673	1.39436			3.87673	1.43772			3.87673	1.66757			3.87673	1.0866			3.87673	1.22633
		3.88341	1.00715			3.88341	1.00772			3.88341	1.01126			3.88341	1.00301			3.88341	0.773296			3.88341	0.893273			3.88341	1.44622			3.88341	1.31633			3.88341	1.36352			3.88341	1.60756			3.88341	1.0896			3.88341	1.22401
		3.89008	1.00672			3.89008	1.00673			3.89008	1.01204			3.89008	1.00188			3.89008	0.772949			3.89008	0.896313			3.89008	1.43025			3.89008	1.35241			3.89008	1.38837			3.89008	1.62739			3.89008	1.09236			3.89008	1.22403
		3.89676	1.00605			3.89676	1.00567			3.89676	1.0126			3.89676	1.00033			3.89676	0.772791			3.89676	0.896011			3.89676	1.42324			3.89676	1.43925			3.89676	1.46091			3.89676	1.70326			3.89676	1.09532			3.89676	1.22339
[truncated: 14 more columns]

## Sheet: Sheet2
Table S2 Spectra of standard samples for comparison.
source	Brown University	Keck/NASA Relab			source	Brown University	Keck/NASA Relab		source	Brown University	Keck/NASA Relab		source	Horgan et al. (2014 Icarus)			source	Horgan et al. (2014 Icarus)			source	Brown University	Keck/NASA Relab
spectral number	CC-JFM-006-B/F1CC06B				spectral number	SA-EAC-058/CASA58			spectral number	LZ-TXH-001/LALZ01			spectral number	OPX-TEK			spectral number	OPX-TEK			spectral number	LACL14
	magnesite					saponite				serpentine				40%PYX023_60%TEK004_lt45				20%PYX023_80%TEK004_lt45				chlorite
	Wavelength(micron)	Reflectance			Wavelength(micron)	Reflectance			Wavelength(micron)	Reflectance			Wavelength(micron)	Reflectance							Wavelength(micron)	Reflectance
	0.3	0.69486			0.3	0.18223			0.3	0.11534			0.35	0.337786			0.35	0.307371			0.3	0.12912
	0.305	0.6925			0.305	0.19034			0.305	0.12442			0.351	0.340104			0.351	0.31037			0.305	0.14492
	0.31	0.69477			0.31	0.20498			0.31	0.13686			0.352	0.341914			0.352	0.311849			0.31	0.15631
	0.315	0.70398			0.315	0.22198			0.315	0.14898			0.353	0.343353			0.353	0.312189			0.315	0.16531
	0.32	0.71283			0.32	0.2411			0.32	0.15958			0.354	0.345322			0.354	0.31295			0.32	0.17316
	0.325	0.71884			0.325	0.26093			0.325	0.16921			0.355	0.348112			0.355	0.315847			0.325	0.17645
	0.33	0.72505			0.33	0.28268			0.33	0.17942			0.356	0.350441			0.356	0.318556			0.33	0.18078
	0.335	0.73201			0.335	0.30524			0.335	0.18853			0.357	0.35092			0.357	0.318797			0.335	0.18382
	0.34	0.74026			0.34	0.33032			0.34	0.19627			0.358	0.35078			0.358	0.318501			0.34	0.18639
	0.345	0.74673			0.345	0.35525			0.345	0.20466			0.359	0.352408			0.359	0.31999			0.345	0.18907
	0.35	0.75667			0.35	0.38134			0.35	0.21278			0.36	0.356428			0.36	0.323869			0.35	0.19279
	0.355	0.76269			0.355	0.40841			0.355	0.22323			0.361	0.357759			0.361	0.324846			0.355	0.19827
	0.36	0.77288			0.36	0.43376			0.36	0.2327			0.362	0.358985			0.362	0.325895			0.36	0.20432
	0.365	0.78229			0.365	0.4552			0.365	0.23832			0.363	0.360163			0.363	0.32702			0.365	0.20831
	0.37	0.79051			0.37	0.47812			0.37	0.24516			0.364	0.361346			0.364	0.328096			0.37	0.2114
	0.375	0.79776			0.375	0.50104			0.375	0.25073			0.365	0.363381			0.365	0.329916			0.375	0.21415
	0.38	0.803			0.38	0.52166			0.38	0.25492			0.366	0.365921			0.366	0.332071			0.38	0.21695
	0.385	0.80893			0.385	0.54158			0.385	0.25794			0.367	0.368935			0.367	0.334383			0.385	0.21939
	0.39	0.8154			0.39	0.56465			0.39	0.26261			0.368	0.369488			0.368	0.334832			0.39	0.22376
	0.395	0.81861			0.395	0.58725			0.395	0.26924			0.369	0.370195			0.369	0.335752			0.395	0.22755
	0.4	0.82495			0.4	0.60406			0.4	0.27243			0.37	0.37164			0.37	0.337691			0.4	0.22806
	0.405	0.82889			0.405	0.61503			0.405	0.27496			0.371	0.373901			0.371	0.340251			0.405	0.22935
	0.41	0.83501			0.41	0.62899			0.41	0.27555			0.372	0.375383			0.372	0.341667			0.41	0.23032
	0.415	0.83988			0.415	0.63915			0.415	0.27892			0.373	0.376482			0.373	0.342483			0.415	0.23478
	0.42	0.84224			0.42	0.64946			0.42	0.2822			0.374	0.378506			0.374	0.34446			0.42	0.24088
	0.425	0.84539			0.425	0.66024			0.425	0.28507			0.375	0.380011			0.375	0.345866			0.425	0.24743
	0.43	0.84772			0.43	0.67036			0.43	0.28734			0.376	0.381437			0.376	0.347119			0.43	0.25227
	0.435	0.84991			0.435	0.68328			0.435	0.28931			0.377	0.383178			0.377	0.348545			0.435	0.25326
	0.44	0.85271			0.44	0.69213			0.44	0.29158			0.378	0.384557			0.378	0.34995			0.44	0.25557
	0.445	0.85558			0.445	0.70231			0.445	0.29557			0.379	0.386538			0.379	0.351743			0.445	0.25948
	0.45	0.85645			0.45	0.70893			0.45	0.29873			0.38	0.389282			0.38	0.35399			0.45	0.26003
	0.455	0.85909			0.455	0.71621			0.455	0.30225			0.381	0.390403			0.381	0.355097			0.455	0.26084
	0.46	0.85948			0.46	0.72501			0.46	0.30568			0.382	0.392482			0.382	0.356819			0.46	0.26449
	0.465	0.86151			0.465	0.73749			0.465	0.31129			0.383	0.394849			0.383	0.358742			0.465	0.26963
	0.47	0.86462			0.47	0.75299			0.47	0.3174			0.384	0.395629			0.384	0.359742			0.47	0.27491
	0.475	0.86664			0.475	0.765			0.475	0.32406			0.385	0.397253			0.385	0.361462			0.475	0.28027
	0.48	0.86764			0.48	0.77412			0.48	0.33072			0.386	0.399007			0.386	0.36323			0.48	0.28593
	0.485	0.87038			0.485	0.78348			0.485	0.3345			0.387	0.400433			0.387	0.36459			0.485	0.29014
	0.49	0.87132			0.49	0.79099			0.49	0.33751			0.388	0.402426			0.388	0.366233			0.49	0.29092
	0.495	0.87282			0.495	0.80052			0.495	0.33924			0.389	0.404383			0.389	0.367989			0.495	0.29038
	0.5	0.87422			0.5	0.80675			0.5	0.34191			0.39	0.40622			0.39	0.369833			0.5	0.29311
	0.505	0.87584			0.505	0.81531			0.505	0.3463			0.391	0.40805			0.391	0.371562			0.505	0.29655
	0.51	0.87732			0.51	0.82272			0.51	0.34959			0.392	0.409			0.392	0.372512			0.51	0.29702
	0.515	0.87947			0.515	0.83124			0.515	0.35182			0.393	0.409755			0.393	0.373246			0.515	0.29816
	0.52	0.88191			0.52	0.83499			0.52	0.35366			0.394	0.412162			0.394	0.375247			0.52	0.29888
	0.525	0.88197			0.525	0.84244			0.525	0.3546			0.395	0.413174			0.395	0.376451			0.525	0.2971
	0.53	0.88502			0.53	0.84621			0.53	0.35806			0.396	0.414093			0.396	0.377594			0.53	0.29754
	0.535	0.88885			0.535	0.85094			0.535	0.35831			0.397	0.415709			0.397	0.379129			0.535	0.29846
	0.54	0.88946			0.54	0.85291			0.54	0.36148			0.398	0.417284			0.398	0.380296			0.54	0.29722
	0.545	0.89066			0.545	0.85819			0.545	0.36446			0.399	0.418535			0.399	0.381284			0.545	0.29756
	0.55	0.89137			0.55	0.86025			0.55	0.36757			0.4	0.419469			0.4	0.382161			0.55	0.29716
	0.555	0.88823			0.555	0.86336			0.555	0.37036			0.401	0.420727			0.401	0.383753			0.555	0.29696
	0.56	0.89005			0.56	0.8636			0.56	0.37344			0.402	0.422035			0.402	0.385091			0.56	0.29643
	0.565	0.89026			0.565	0.86745			0.565	0.37698			0.403	0.42326			0.403	0.386165			0.565	0.29578
	0.57	0.8917			0.57	0.86899			0.57	0.38036			0.404	0.424128			0.404	0.386829			0.57	0.29528
	0.575	0.89162			0.575	0.87048			0.575	0.38308			0.405	0.425533			0.405	0.388281			0.575	0.29391
	0.58	0.8926			0.58	0.87156			0.58	0.38776			0.406	0.426832			0.406	0.389638			0.58	0.2923
	0.585	0.89281			0.585	0.87387			0.585	0.39101			0.407	0.427712			0.407	0.390465			0.585	0.29103
	0.59	0.89381			0.59	0.87579			0.59	0.39213			0.408	0.429134			0.408	0.391606			0.59	0.28843
	0.595	0.89387			0.595	0.87677			0.595	0.39379			0.409	0.430241			0.409	0.392775			0.595	0.28642
	0.6	0.89451			0.6	0.8785			0.6	0.39531			0.41	0.431013			0.41	0.393902			0.6	0.28466
	0.605	0.89475			0.605	0.88175			0.605	0.39526			0.411	0.432111			0.411	0.394397			0.605	0.28231
	0.61	0.89594			0.61	0.88088			0.61	0.39582			0.412	0.433182			0.412	0.395615			0.61	0.28041
	0.615	0.89544			0.615	0.88255			0.615	0.39436			0.413	0.43424			0.413	0.397006			0.615	0.27987
	0.62	0.89555			0.62	0.88198			0.62	0.39451			0.414	0.435369			0.414	0.397682			0.62	0.27719
	0.625	0.89606			0.625	0.88371			0.625	0.39328			0.415	0.436409			0.415	0.398654			0.625	0.27564
	0.63	0.8957			0.63	0.88384			0.63	0.39306			0.416	0.437565			0.416	0.399814			0.63	0.27372
	0.635	0.89623			0.635	0.88607			0.635	0.39148			0.417	0.438986			0.417	0.401187			0.635	0.27138
	0.64	0.89657			0.64	0.88707			0.64	0.39114			0.418	0.439899			0.418	0.402222			0.64	0.26854
	0.645	0.89655			0.645	0.88878			0.645	0.38952			0.419	0.440821			0.419	0.403143			0.645	0.26641
	0.65	0.89665			0.65	0.88749			0.65	0.38822			0.42	0.441806			0.42	0.404001			0.65	0.26508
	0.655	0.89703			0.655	0.89105			0.655	0.38707			0.421	0.443123			0.421	0.405087			0.655	0.26269
	0.66	0.89806			0.66	0.89381			0.66	0.38616			0.422	0.444163			0.422	0.406036			0.66	0.26097
	0.665	0.89757			0.665	0.89635			0.665	0.38509			0.423	0.445081			0.423	0.406948			0.665	0.25826
	0.67	0.89788			0.67	0.89663			0.67	0.38324			0.424	0.44608			0.424	0.407991			0.67	0.25735
	0.675	0.89765			0.675	0.89967			0.675	0.38025			0.425	0.447356			0.425	0.409137			0.675	0.25422
	0.68	0.89939			0.68	0.90213			0.68	0.37921			0.426	0.448458			0.426	0.410136			0.68	0.25304
	0.685	0.89867			0.685	0.90215			0.685	0.37879			0.427	0.449209			0.427	0.410891			0.685	0.25183
	0.69	0.89913			0.69	0.90516			0.69	0.37902			0.428	0.450376			0.428	0.412056			0.69	0.25037
	0.695	0.89911			0.695	0.90496			0.695	0.37823			0.429	0.451553			0.429	0.413142			0.695	0.25032
	0.7	0.89948			0.7	0.90695			0.7	0.37953			0.43	0.452702			0.43	0.414123			0.7	0.24967
	0.705	0.89879			0.705	0.90941			0.705	0.37906			0.431	0.453785			0.431	0.415076			0.705	0.24951
	0.71	0.89739			0.71	0.90836			0.71	0.37762			0.432	0.454984			0.432	0.416122			0.71	0.24935
	0.715	0.89906			0.715	0.91102			0.715	0.38116			0.433	0.456171			0.433	0.417164			0.715	0.24999
	0.72	0.89994			0.72	0.91121			0.72	0.3816			0.434	0.457169			0.434	0.418067			0.72	0.2508
	0.725	0.89977			0.725	0.91319			0.725	0.38253			0.435	0.458398			0.435	0.419082			0.725	0.25105
	0.73	0.90016			0.73	0.91698			0.73	0.38354			0.436	0.459621			0.436	0.420045			0.73	0.25329
	0.735	0.89963			0.735	0.9188			0.735	0.38363			0.437	0.460776			0.437	0.420907			0.735	0.25399
	0.74	0.9004			0.74	0.91618			0.74	0.38489			0.438	0.461819			0.438	0.421944			0.74	0.25644
	0.745	0.9007			0.745	0.91479			0.745	0.38857			0.439	0.462863			0.439	0.422911			0.745	0.25821
	0.75	0.90057			0.75	0.91404			0.75	0.39066			0.44	0.463898			0.44	0.423809			0.75	0.26042
	0.755	0.90084			0.755	0.91539			0.755	0.39185			0.441	0.464914			0.441	0.424737			0.755	0.26338
	0.76	0.9			0.76	0.91934			0.76	0.39617			0.442	0.465925			0.442	0.425731			0.76	0.26635
	0.765	0.90231			0.765	0.92051			0.765	0.3989			0.443	0.466931			0.443	0.426732			0.765	0.26665
	0.77	0.90156			0.77	0.91745			0.77	0.39992			0.444	0.467931			0.444	0.427666			0.77	0.26912
	0.775	0.90246			0.775	0.91839			0.775	0.40141			0.445	0.468867			0.445	0.42853			0.775	0.27147
	0.78	0.90246			0.78	0.91876			0.78	0.40346			0.446	0.46979			0.446	0.429353			0.78	0.27481
	0.785	0.90284			0.785	0.91787			0.785	0.40411			0.447	0.470722			0.447	0.430143			0.785	0.27711
	0.79	0.90336			0.79	0.91685			0.79	0.40642			0.448	0.471721			0.448	0.431049			0.79	0.27917
	0.795	0.90246			0.795	0.91685			0.795	0.40857			0.449	0.47266			0.449	0.431837			0.795	0.28099
	0.8	0.90494			0.8	0.91318			0.8	0.40891			0.45	0.473573			0.45	0.43257			0.8	0.28255
	0.805	0.90624			0.805	0.91545			0.805	0.40861			0.451	0.474601			0.451	0.433564			0.805	0.28347
	0.81	0.90531			0.81	0.91282			0.81	0.40908			0.452	0.47558			0.452	0.434474			0.81	0.28394
	0.815	0.90661			0.815	0.9138			0.815	0.40826			0.453	0.476535			0.453	0.435346			0.815	0.28389
	0.82	0.90598			0.82	0.91462			0.82	0.40864			0.454	0.477472			0.454	0.436204			0.82	0.2849
	0.825	0.90612			0.825	0.91434			0.825	0.40868			0.455	0.478381			0.455	0.437142			0.825	0.28429
	0.83	0.90735			0.83	0.91158			0.83	0.40805			0.456	0.479275			0.456	0.438008			0.83	0.28405
	0.835	0.90607			0.835	0.91249			0.835	0.40737			0.457	0.480164			0.457	0.438761			0.835	0.283
	0.84	0.9064			0.84	0.9152			0.84	0.40687			0.458	0.481024			0.458	0.439629			0.84	0.28156
	0.845	0.90628			0.845	0.91492			0.845	0.40578			0.459	0.481925			0.459	0.440452			0.845	0.28062
	0.85	0.90526			0.85	0.9133			0.85	0.40556			0.46	0.482842			0.46	0.441244			0.85	0.27934
	0.855	0.90293			0.855	0.9137			0.855	0.40421			0.461	0.483686			0.461	0.442093			0.855	0.27863
	0.86	0.90584			0.86	0.91498			0.86	0.40269			0.462	0.484558			0.462	0.442866			0.86	0.27767
	0.865	0.90319			0.865	0.90866			0.865	0.40214			0.463	0.48543			0.463	0.443641			0.865	0.27679
	0.87	0.90431			0.87	0.90954			0.87	0.40142			0.464	0.486282			0.464	0.444506			0.87	0.27598
	0.875	0.90462			0.875	0.91149			0.875	0.40084			0.465	0.487088			0.465	0.445228			0.875	0.27556
	0.88	0.90312			0.88	0.91237			0.88	0.40009			0.466	0.487895			0.466	0.445972			0.88	0.27431
	0.885	0.90247			0.885	0.90719			0.885	0.39955			0.467	0.488714			0.467	0.446778			0.885	0.2744
	0.89	0.90268			0.89	0.91299			0.89	0.39938			0.468	0.489469			0.468	0.447493			0.89	0.2747
	0.895	0.90279			0.895	0.91398			0.895	0.39944			0.469	0.490291			0.469	0.448266			0.895	0.27468
	0.9	0.90162			0.9	0.91365			0.9	0.40058			0.47	0.491156			0.47	0.449062			0.9	0.27454
	0.905	0.90272			0.905	0.91172			0.905	0.4011			0.471	0.492039			0.471	0.449802			0.905	0.27533
	0.91	0.89996			0.91	0.90813			0.91	0.40081			0.472	0.492835			0.472	0.450512			0.91	0.27639
	0.915	0.90147			0.915	0.91252			0.915	0.40215			0.473	0.493625			0.473	0.451216			0.915	0.27767
	0.92	0.90041			0.92	0.90998			0.92	0.40262			0.474	0.494492			0.474	0.451944			0.92	0.27845
	0.925	0.90015			0.925	0.90844			0.925	0.4038			0.475	0.495282			0.475	0.452697			0.925	0.27876
	0.93	0.90049			0.93	0.90809			0.93	0.40142			0.476	0.496045			0.476	0.45339			0.93	0.28226
	0.935	0.89942			0.935	0.90638			0.935	0.40448			0.477	0.496788			0.477	0.454007			0.935	0.28328
	0.94	0.90103			0.94	0.90829			0.94	0.40591			0.478	0.497741			0.478	0.454849			0.94	0.28511
	0.945	0.89977			0.945	0.89502			0.945	0.40602			0.479	0.498583			0.479	0.45558			0.945	0.28676
	0.95	0.90035			0.95	0.88851			0.95	0.40691			0.48	0.499359			0.48	0.456251			0.95	0.28752
	0.955	0.90071			0.955	0.90055			0.955	0.4088			0.481	0.500231			0.481	0.457036			0.955	0.28899
	0.96	0.90031			0.96	0.89624			0.96	0.41081			0.482	0.501044			0.482	0.457764			0.96	0.29134
	0.965	0.90045			0.965	0.89402			0.965	0.41286			0.483	0.501828			0.483	0.458475			0.965	0.29327
	0.97	0.90087			0.97	0.89692			0.97	0.41518			0.484	0.50258			0.484	0.459182			0.97	0.29408
	0.975	0.90107			0.975	0.90033			0.975	0.417			0.485	0.50347			0.485	0.459944			0.975	0.2952
	0.98	0.89988			0.98	0.89996			0.98	0.41836			0.486	0.504334			0.486	0.460651			0.98	0.29661
	0.985	0.90093			0.985	0.90096			0.985	0.4192			0.487	0.505147			0.487	0.461286			0.985	0.29758
	0.99	0.89968			0.99	0.90009			0.99	0.42001			0.488	0.505963			0.488	0.461966			0.99	0.29873
	0.995	0.90005			0.995	0.9023			0.995	0.42053			0.489	0.506757			0.489	0.462659			0.995	0.29927
	1	0.89941			1	0.90208			1	0.42186			0.49	0.507531			0.49	0.463348			1	0.29975
	1.005	0.90124			1.005	0.90375			1.005	0.42205			0.491	0.508251			0.491	0.463961			1.005	0.30034
	1.01	0.90181			1.01	0.90416			1.01	0.42286			0.492	0.509021			0.492	0.464613			1.01	0.30051
	1.015	0.90256			1.015	0.90656			1.015	0.42285			0.493	0.509814			0.493	0.46529			1.015	0.30125
	1.02	0.90273			1.02	0.90774			1.02	0.4243			0.494	0.510625			0.494	0.466			1.02	0.30125
	1.025	0.90189			1.025	0.90633			1.025	0.42548			0.495	0.511351			0.495	0.466577			1.025	0.30171
	1.03	0.90285			1.03	0.90761			1.03	0.42645			0.496	0.512142			0.496	0.467228			1.03	0.30137
	1.035	0.90244			1.035	0.90984			1.035	0.42481			0.497	0.513004			0.497	0.467964			1.035	0.30161
	1.04	0.90264			1.04	0.90879			1.04	0.42605			0.498	0.513847			0.498	0.468625			1.04	0.30158
	1.045	0.90346			1.045	0.90969			1.045	0.42635			0.499	0.51468			0.499	0.469255			1.045	0.30158
	1.05	0.903			1.05	0.91064			1.05	0.42623			0.5	0.515499			0.5	0.469881			1.05	0.30243
	1.055	0.90279			1.055	0.91046			1.055	0.42415			0.501	0.51626			0.501	0.470532			1.055	0.30228
	1.06	0.903			1.06	0.91201			1.06	0.42772			0.502	0.516994			0.502	0.471126			1.06	0.30112
	1.065	0.90407			1.065	0.91058			1.065	0.42502			0.503	0.517651			0.503	0.471698			1.065	0.30158
	1.07	0.90473			1.07	0.91247			1.07	0.42689			0.504	0.518202			0.504	0.472277			1.07	0.3025
	1.075	0.90414			1.075	0.91211			1.075	0.42659			0.505	0.51874			0.505	0.472783			1.075	0.30223
	1.08	0.9037			1.08	0.91333			1.08	0.42662			0.506	0.519309			0.506	0.473299			1.08	0.30215
	1.085	0.90448			1.085	0.91276			1.085	0.42634			0.507	0.519918			0.507	0.473836			1.085	0.30237
	1.09	0.90486			1.09	0.9121			1.09	0.42645			0.508	0.520784			0.508	0.474478			1.09	0.30206
	1.095	0.90402			1.095	0.91388			1.095	0.42757			0.509	0.521695			0.509	0.475165			1.095	0.30309
	1.1	0.90428			1.1	0.91212			1.1	0.42773			0.51	0.522637			0.51	0.475858			1.1	0.30372
	1.105	0.9045			1.105	0.91442			1.105	0.42841			0.511	0.523647			0.511	0.476523			1.105	0.30345
	1.11	0.90554			1.11	0.91346			1.11	0.42837			0.512	0.524615			0.512	0.47723			1.11	0.30384
	1.115	0.90532			1.115	0.91206			1.115	0.43104			0.513	0.525523			0.513	0.477899			1.115	0.30406
	1.12	0.90462			1.12	0.91187			1.12	0.42998			0.514	0.526342			0.514	0.478476			1.12	0.30561
	1.125	0.90545			1.125	0.9118			1.125	0.43088			0.515	0.527063			0.515	0.479049			1.125	0.3062
	1.13	0.90515			1.13	0.91129			1.13	0.43151			0.516	0.527812			0.516	0.479635			1.13	0.30768
	1.135	0.90471			1.135	0.90581			1.135	0.43234			0.517	0.528574			0.517	0.480222			1.135	0.3075
	1.14	0.90422			1.14	0.90309			1.14	0.43427			0.518	0.529243			0.518	0.48076			1.14	0.30836
	1.145	0.90486			1.145	0.89435			1.145	0.43311			0.519	0.529914			0.519	0.481277			1.145	0.30972
	1.15	0.90359			1.15	0.88567			1.15	0.43545			0.52	0.530564			0.52	0.481773			1.15	0.31108
	1.155	0.90358			1.155	0.88211			1.155	0.43366			0.521	0.531159			0.521	0.482258			1.155	0.31231
	1.16	0.9038			1.16	0.88402			1.16	0.43568			0.522	0.531771			0.522	0.482756			1.16	0.31353
	1.165	0.90339			1.165	0.88983			1.165	0.43761			0.523	0.532374			0.523	0.483225			1.165	0.31504
	1.17	0.90308			1.17	0.89338			1.17	0.4386			0.524	0.532959			0.524	0.483647			1.17	0.31649
	1.175	0.90363			1.175	0.89557			1.175	0.43936			0.525	0.533526			0.525	0.484105			1.175	0.31797
	1.18	0.90341			1.18	0.90003			1.18	0.44109			0.526	0.534048			0.526	0.484525			1.18	0.31908
	1.185	0.90277			1.185	0.89956			1.185	0.44166			0.527	0.534531			0.527	0.484911			1.185	0.32099
	1.19	0.90289			1.19	0.90157			1.19	0.44374			0.528	0.535066			0.528	0.485354			1.19	0.32211
	1.195	0.90239			1.195	0.90128			1.195	0.44511			0.529	0.535579			0.529	0.485781			1.195	0.3237
	1.2	0.90151			1.2	0.90359			1.2	0.44451			0.53	0.53607			0.53	0.486196			1.2	0.3255
	1.205	0.90208			1.205	0.90412			1.205	0.44718			0.531	0.536532			0.531	0.486595			1.205	0.3274
	1.21	0.90213			1.21	0.90288			1.21	0.44865			0.532	0.537035			0.532	0.487011			1.21	0.32934
	1.215	0.90055			1.215	0.90706			1.215	0.4501			0.533	0.537521			0.533	0.487408			1.215	0.33125
	1.22	0.90014			1.22	0.90539			1.22	0.45169			0.534	0.537969			0.534	0.487771			1.22	0.33281
	1.225	0.90043			1.225	0.90863			1.225	0.45209			0.535	0.538417			0.535	0.488166			1.225	0.33435
	1.23	0.90035			1.23	0.90673			1.23	0.45202			0.536	0.538828			0.536	0.488522			1.23	0.33625
	1.235	0.90036			1.235	0.909			1.235	0.45334			0.537	0.539215			0.537	0.488858			1.235	0.33791
	1.24	0.90117			1.24	0.90882			1.24	0.4549			0.538	0.53959			0.538	0.489225			1.24	0.33972
	1.245	0.9011			1.245	0.90748			1.245	0.45593			0.539	0.540002			0.539	0.489594			1.245	0.34168
	1.25	0.90082			1.25	0.91006			1.25	0.45859			0.54	0.540389			0.54	0.489943			1.25	0.34302
	1.255	0.90025			1.255	0.91048			1.255	0.45989			0.541	0.540692			0.541	0.490261			1.255	0.34401
	1.26	0.90116			1.26	0.90861			1.26	0.46193			0.542	0.541052			0.542	0.4906			1.26	0.34605
	1.265	0.90068			1.265	0.91026			1.265	0.46099			0.543	0.541405			0.543	0.490926			1.265	0.34774
	1.27	0.90097			1.27	0.90615			1.27	0.46293			0.544	0.541722			0.544	0.491215			1.27	0.34968
	1.275	0.89959			1.275	0.9051			1.275	0.46454			0.545	0.542028			0.545	0.491546			1.275	0.35117
	1.28	0.8987			1.28	0.90327			1.28	0.46374			0.546	0.542352			0.546	0.491862			1.28	0.35298
	1.285	0.89927			1.285	0.90682			1.285	0.46611			0.547	0.542697			0.547	0.492173			1.285	0.35511
	1.29	0.89957			1.29	0.90737			1.29	0.46711			0.548	0.543001			0.548	0.492476			1.29	0.35626
	1.295	0.89956			1.295	0.90165			1.295	0.47			0.549	0.543376			0.549	0.492832			1.295	0.35823
	1.3	0.89857			1.3	0.90115			1.3	0.47165			0.55	0.543775			0.55	0.493205			1.3	0.36003
	1.305	0.89755			1.305	0.90108			1.305	0.47227			0.551	0.544208			0.551	0.493615			1.305	0.36207
	1.31	0.89765			1.31	0.89994			1.31	0.47229			0.552	0.544644			0.552	0.493992			1.31	0.36329
	1.315	0.8981			1.315	0.89615			1.315	0.47418			0.553	0.545072			0.553	0.494372			1.315	0.36591
	1.32	0.89708			1.32	0.88976			1.32	0.47627			0.554	0.545483			0.554	0.494763			1.32	0.36734
	1.325	0.89669			1.325	0.88444			1.325	0.47783			0.555	0.545945			0.555	0.495156			1.325	0.36908
	1.33	0.89577			1.33	0.87822			1.33	0.47834			0.556	0.546387			0.556	0.49554			1.33	0.37064
	1.335	0.89521			1.335	0.87379			1.335	0.47926			0.557	0.546817			0.557	0.49592			1.335	0.37266
	1.34	0.8941			1.34	0.86957			1.34	0.48038			0.558	0.547264			0.558	0.496321			1.34	0.37439
	1.345	0.89415			1.345	0.86413			1.345	0.48016			0.559	0.547664			0.559	0.496671			1.345	0.37656
	1.35	0.89224			1.35	0.85839			1.35	0.48177			0.56	0.548042			0.56	0.497			1.35	0.3773
	1.355	0.89018			1.355	0.85114			1.355	0.48101			0.561	0.548413			0.561	0.497332			1.355	0.37802
	1.36	0.89056			1.36	0.84564			1.36	0.47918			0.562	0.548784			0.562	0.497693			1.36	0.37962
	1.365	0.88624			1.365	0.84391			1.365	0.47931			0.563	0.549144			0.563	0.498049			1.365	0.3805
	1.37	0.88612			1.37	0.83451			1.37	0.48096			0.564	0.549481			0.564	0.498388			1.37	0.38209
	1.375	0.88408			1.375	0.82135			1.375	0.48189			0.565	0.549831			0.565	0.498732			1.375	0.38345
	1.38	0.8833			1.38	0.79654			1.38	0.46147			0.566	0.550166			0.566	0.499064			1.38	0.38471
	1.385	0.87172			1.385	0.72393			1.385	0.43234			0.567	0.550487			0.567	0.499383			1.385	0.37901
	1.39	0.871			1.39	0.57251			1.39	0.42773			0.568	0.550793			0.568	0.499683			1.39	0.35827
	1.395	0.86732			1.395	0.64072			1.395	0.42564			0.569	0.551099			0.569	0.5			1.395	0.36623
	1.4	0.86468			1.4	0.68355			1.4	0.446			0.57	0.551392			0.57	0.50031			1.4	0.37885
	1.405	0.85778			1.405	0.65921			1.405	0.45869			0.571	0.551658			0.571	0.500587			1.405	0.38347
	1.41	0.85113			1.41	0.63899			1.41	0.46846			0.572	0.551916			0.572	0.500861			1.41	0.3842
	1.415	0.8516			1.415	0.63331			1.415	0.47563			0.573	0.552167			0.573	0.501128			1.415	0.38646
	1.42	0.84725			1.42	0.64145			1.42	0.48065			0.574	0.552412			0.574	0.501386			1.42	0.3892
	1.425	0.84493			1.425	0.65742			1.425	0.48276			0.575	0.552662			0.575	0.501609			1.425	0.39016
	1.43	0.8425			1.43	0.67272			1.43	0.48655			0.576	0.552891			0.576	0.501847			1.43	0.39075
	1.435	0.83994			1.435	0.68674			1.435	0.48856			0.577	0.553106			0.577	0.502096			1.435	0.39095
	1.44	0.83838			1.44	0.69871			1.44	0.49096			0.578	0.553323			0.578	0.502343			1.44	0.39306
	1.445	0.83499			1.445	0.70709			1.445	0.49344			0.579	0.553537			0.579	0.502565			1.445	0.3939
	1.45	0.83314			1.45	0.71335			1.45	0.49538			0.58	0.553747			0.58	0.502769			1.45	0.39589
	1.455	0.83108			1.455	0.71603			1.455	0.4969			0.581	0.55395			0.581	0.502953			1.455	0.39939
	1.46	0.82988			1.46	0.7146			1.46	0.49809			0.582	0.554121			0.582	0.503134			1.46	0.40064
	1.465	0.82777			1.465	0.71625			1.465	0.4995			0.583	0.554295			0.583	0.503326			1.465	0.40263
	1.47	0.82743			1.47	0.7243			1.47	0.50015			0.584	0.554483			0.584	0.503535			1.47	0.40503
	1.475	0.82543			1.475	0.73582			1.475	0.49987			0.585	0.55466			0.585	0.503732			1.475	0.4059
	1.48	0.82423			1.48	0.74927			1.48	0.50277			0.586	0.554834			0.586	0.50391			1.48	0.40803
	1.485	0.82338			1.485	0.76011			1.485	0.50462			0.587	0.555002			0.587	0.50408			1.485	0.40961
	1.49	0.82173			1.49	0.76767			1.49	0.50484			0.588	0.555156			0.588	0.504267			1.49	0.41004
	1.495	0.82097			1.495	0.77566			1.495	0.50653			0.589	0.555309			0.589	0.504426			1.495	0.41222
	1.5	0.82054			1.5	0.78298			1.5	0.5074			0.59	0.555457			0.59	0.504573			1.5	0.41306
	1.505	0.81877			1.505	0.78781			1.505	0.5083			0.591	0.555594			0.591	0.504714			1.505	0.41289
	1.51	0.81842			1.51	0.79403			1.51	0.50905			0.592	0.555727			0.592	0.504852			1.51	0.41392
	1.515	0.81767			1.515	0.79926			1.515	0.51091			0.593	0.555867			0.593	0.504994			1.515	0.41575
	1.52	0.81786			1.52	0.80283			1.52	0.51099			0.594	0.556017			0.594	0.505142			1.52	0.41664
	1.525	0.81753			1.525	0.80812			1.525	0.51191			0.595	0.556156			0.595	0.505284			1.525	0.41729
	1.53	0.81761			1.53	0.81232			1.53	0.51218			0.596	0.556307			0.596	0.50542			1.53	0.41816
	1.535	0.81705			1.535	0.81559			1.535	0.5129			0.597	0.556458			0.597	0.505552			1.535	0.41931
	1.54	0.81741			1.54	0.82093			1.54	0.51334			0.598	0.556617			0.598	0.50572			1.54	0.42004
	1.545	0.81724			1.545	0.82461			1.545	0.51474			0.599	0.556747			0.599	0.505854			1.545	0.42176
	1.55	0.81804			1.55	0.82833			1.55	0.51521			0.6	0.556872			0.6	0.505983			1.55	0.42289
	1.555	0.8199			1.555	0.82972			1.555	0.51578			0.601	0.556991			0.601	0.50611			1.555	0.42424
	1.56	0.81977			1.56	0.83385			1.56	0.51642			0.602	0.557076			0.602	0.506199			1.56	0.42558
	1.565	0.82018			1.565	0.83743			1.565	0.51823			0.603	0.557165			0.603	0.506295			1.565	0.42596
	1.57	0.82095			1.57	0.84045			1.57	0.5187			0.604	0.55727			0.604	0.506409			1.57	0.42828
	1.575	0.8227			1.575	0.84103			1.575	0.51965			0.605	0.557346			0.605	0.506471			1.575	0.42845
	1.58	0.8232			1.58	0.84208			1.58	0.51946			0.606	0.557366			0.606	0.506506			1.58	0.43029
	1.585	0.8233			1.585	0.84576			1.585	0.52112			0.607	0.557388			0.607	0.506552			1.585	0.43231
	1.59	0.82368			1.59	0.84733			1.59	0.52007			0.608	0.557544			0.608	0.506701			1.59	0.43332
	1.595	0.82404			1.595	0.85005			1.595	0.52101			0.609	0.557826			0.609	0.507014			1.595	0.43415
	1.6	0.82405			1.6	0.85067			1.6	0.5224			0.61	0.558099			0.61	0.50733			1.6	0.43653
	1.605	0.82516			1.605	0.8538			1.605	0.52169			0.611	0.558292			0.611	0.507572			1.605	0.43712
	1.61	0.82506			1.61	0.85166			1.61	0.5234			0.612	0.558342			0.612	0.507603			1.61	0.4385
	1.615	0.82537			1.615	0.8541			1.615	0.52451			0.613	0.558282			0.613	0.507506			1.615	0.43936
	1.62	0.82626			1.62	0.85548			1.62	0.52379			0.614	0.558122			0.614	0.507298			1.62	0.44046
	1.625	0.82555			1.625	0.85731			1.625	0.52432			0.615	0.557911			0.615	0.50706			1.625	0.44144
	1.63	0.82563			1.63	0.85582			1.63	0.52489			0.616	0.557808			0.616	0.506941			1.63	0.44304
	1.635	0.82558			1.635	0.85967			1.635	0.52538			0.617	0.557796			0.617	0.50693			1.635	0.44388
	1.64	0.8231			1.64	0.8599			1.64	0.52639			0.618	0.557901			0.618	0.50708			1.64	0.44554
	1.645	0.82351			1.645	0.8606			1.645	0.52688			0.619	0.557959			0.619	0.507149			1.645	0.44665
	1.65	0.8229			1.65	0.86332			1.65	0.52774			0.62	0.557976			0.62	0.507159			1.65	0.4475
	1.655	0.82391			1.655	0.8607			1.655	0.52733			0.621	0.557941			0.621	0.507106			1.655	0.44914
	1.66	0.82072			1.66	0.86024			1.66	0.52776			0.622	0.557916			0.622	0.507045			1.66	0.45
	1.665	0.82149			1.665	0.86032			1.665	0.5288			0.623	0.557942			0.623	0.507048			1.665	0.45137
	1.67	0.82155			1.67	0.86095			1.67	0.52891			0.624	0.558009			0.624	0.507104			1.67	0.45189
	1.675	0.81978			1.675	0.85945			1.675	0.52903			0.625	0.557958			0.625	0.507051			1.675	0.4528
	1.68	0.81959			1.68	0.85927			1.68	0.53011			0.626	0.558073			0.626	0.507136			1.68	0.45394
	1.685	0.819			1.685	0.85805			1.685	0.53066			0.627	0.558201			0.627	0.507224			1.685	0.45528
	1.69	0.81731			1.69	0.85914			1.69	0.53017			0.628	0.558117			0.628	0.507114			1.69	0.45598
	1.695	0.8164			1.695	0.85741			1.695	0.53117			0.629	0.558119			0.629	0.507126			1.695	0.45694
	1.7	0.81665			1.7	0.8559			1.7	0.53222			0.63	0.558132			0.63	0.507161			1.7	0.46022
	1.705	0.81658			1.705	0.85474			1.705	0.53099			0.631	0.558136			0.631	0.507192			1.705	0.45945
	1.71	0.81617			1.71	0.85219			1.71	0.53112			0.632	0.558064			0.632	0.507141			1.71	0.46023
	1.715	0.81517			1.715	0.84958			1.715	0.53142			0.633	0.558003			0.633	0.507082			1.715	0.46033
	1.72	0.81446			1.72	0.84742			1.72	0.5312			0.634	0.557953			0.634	0.507023			1.72	0.46057
	1.725	0.81417			1.725	0.84382			1.725	0.53178			0.635	0.557918			0.635	0.506998			1.725	0.46167
	1.73	0.81348			1.73	0.84164			1.73	0.5322			0.636	0.557939			0.636	0.507033			1.73	0.46222
	1.735	0.81323			1.735	0.83763			1.735	0.53294			0.637	0.55802			0.637	0.507122			1.735	0.46305
	1.74	0.81284			1.74	0.83325			1.74	0.53134			0.638	0.55819			0.638	0.507283			1.74	0.46395
	1.745	0.81343			1.745	0.82955			1.745	0.53189			0.639	0.558149			0.639	0.507246			1.745	0.46449
	1.75	0.81343			1.75	0.82674			1.75	0.53175			0.64	0.558102			0.64	0.507198			1.75	0.46497
	1.755	0.81304			1.755	0.82212			1.755	0.53078			0.641	0.558106			0.641	0.507192			1.755	0.46525
	1.76	0.81207			1.76	0.81847			1.76	0.5311			0.642	0.558017			0.642	0.507095			1.76	0.46606
	1.765	0.81162			1.765	0.81442			1.765	0.5307			0.643	0.557843			0.643	0.506902			1.765	0.46529
	1.77	0.81146			1.77	0.81189			1.77	0.5302			0.644	0.557635			0.644	0.506665			1.77	0.46658
	1.775	0.80984			1.775	0.80724			1.775	0.53031			0.645	0.557653			0.645	0.50666			1.775	0.46719
	1.78	0.80904			1.78	0.80457			1.78	0.52933			0.646	0.557693			0.646	0.506683			1.78	0.467
	1.785	0.80788			1.785	0.80162			1.785	0.52952			0.647	0.557783			0.647	0.506764			1.785	0.46764
	1.79	0.80706			1.79	0.79851			1.79	0.53058			0.648	0.557981			0.648	0.506967			1.79	0.4687
	1.795	0.80604			1.795	0.7957			1.795	0.53063			0.649	0.557993			0.649	0.506976			1.795	0.46948
	1.8	0.80476			1.8	0.79235			1.8	0.53084			0.65	0.557974			0.65	0.506946			1.8	0.46982
	1.805	0.80383			1.805	0.7919			1.805	0.53114			0.651	0.557957			0.651	0.506908			1.805	0.46946
	1.81	0.80252			1.81	0.78826			1.81	0.53052			0.652	0.557915			0.652	0.506828			1.81	0.4705
	1.815	0.80024			1.815	0.78617			1.815	0.53083			0.653	0.557904			0.653	0.506794			1.815	0.47138
	1.82	0.8			1.82	0.78404			1.82	0.53068			0.654	0.557904			0.654	0.506779			1.82	0.47127
	1.825	0.79844			1.825	0.78455			1.825	0.52988			0.655	0.557891			0.655	0.50673			1.825	0.47032
	1.83	0.79674			1.83	0.77911			1.83	0.53163			0.656	0.55785			0.656	0.506677			1.83	0.47101
	1.835	0.79576			1.835	0.77439			1.835	0.5318			0.657	0.557799			0.657	0.506622			1.835	0.47168
	1.84	0.79412			1.84	0.774			1.84	0.5316			0.658	0.557748			0.658	0.506562			1.84	0.47058
	1.845	0.7899			1.845	0.76996			1.845	0.52957			0.659	0.557651			0.659	0.506469			1.845	0.46994
	1.85	0.78694			1.85	0.76356			1.85	0.52863			0.66	0.557573			0.66	0.50639			1.85	0.47059
	1.855	0.78613			1.855	0.75485			1.855	0.52834			0.661	0.557518			0.661	0.506322			1.855	0.46913
	1.86	0.78789			1.86	0.74391			1.86	0.52717			0.662	0.557443			0.662	0.506238			1.86	0.46949
	1.865	0.78983			1.865	0.72525			1.865	0.5271			0.663	0.557382			0.663	0.506156			1.865	0.46978
	1.87	0.79072			1.87	0.69679			1.87	0.53039			0.664	0.557327			0.664	0.506072			1.87	0.47262
	1.875	0.78586			1.875	0.67436			1.875	0.52373			0.665	0.557253			0.665	0.505977			1.875	0.46791
	1.88	0.77801			1.88	0.63197			1.88	0.5192			0.666	0.557202			0.666	0.505906			1.88	0.467
	1.885	0.76964			1.885	0.57074			1.885	0.51733			0.667	0.557154			0.667	0.505834			1.885	0.46874
	1.89	0.7616			1.89	0.50019			1.89	0.5144			0.668	0.557101			0.668	0.505746			1.89	0.47002
	1.895	0.75249			1.895	0.42687			1.895	0.50795			0.669	0.557042			0.669	0.505675			1.895	0.47015
	1.9	0.74275			1.9	0.37179			1.9	0.50288			0.67	0.55698			0.67	0.505592			1.9	0.47279
	1.905	0.73053			1.905	0.34727			1.905	0.49661			0.671	0.556913			0.671	0.50549			1.905	0.47034
	1.91	0.71952			1.91	0.35246			1.91	0.48817			0.672	0.556866			0.672	0.505378			1.91	0.46929
	1.915	0.70918			1.915	0.37158			1.915	0.48767			0.673	0.556837			0.673	0.505295			1.915	0.47023
	1.92	0.69929			1.92	0.39657			1.92	0.48528			0.674	0.556815			0.674	0.505223			1.92	0.47137
	1.925	0.69023			1.925	0.4261			1.925	0.48512			0.675	0.55677			0.675	0.505117			1.925	0.4695
	1.93	0.68488			1.93	0.44784			1.93	0.48624			0.676	0.556725			0.676	0.505039			1.93	0.47032
	1.935	0.68056			1.935	0.4636			1.935	0.48662			0.677	0.556687			0.677	0.504971			1.935	0.47022
	1.94	0.67771			1.94	0.47505			1.94	0.48792			0.678	0.556665			0.678	0.504901			1.94	0.46992
	1.945	0.67423			1.945	0.48455			1.945	0.4876			0.679	0.55661			0.679	0.504803			1.945	0.46959
	1.95	0.67112			1.95	0.49161			1.95	0.48763			0.68	0.556554			0.68	0.504706			1.95	0.46842
	1.955	0.66877			1.955	0.49676			1.955	0.48755			0.681	0.556498			0.681	0.504613			1.955	0.4675
	1.96	0.66648			1.96	0.50488			1.96	0.48819			0.682	0.556418			0.682	0.5045			1.96	0.46735
	1.965	0.66404			1.965	0.5127			1.965	0.48725			0.683	0.556337			0.683	0.504393			1.965	0.46758
	1.97	0.6621			1.97	0.52254			1.97	0.48678			0.684	0.556256			0.684	0.504293			1.97	0.46671
	1.975	0.66061			1.975	0.53259			1.975	0.48634			0.685	0.556176			0.685	0.5042			1.975	0.46612
	1.98	0.65873			1.98	0.54358			1.98	0.48608			0.686	0.55608			0.686	0.504066			1.98	0.46451
	1.985	0.65907			1.985	0.5554			1.985	0.48602			0.687	0.555988			0.687	0.503933			1.985	0.46458
	1.99	0.65896			1.99	0.56575			1.99	0.48734			0.688	0.555896			0.688	0.503813			1.99	0.46482
	1.995	0.65936			1.995	0.5776			1.995	0.48901			0.689	0.555745			0.689	0.503665			1.995	0.46486
	2	0.65943			2	0.59008			2	0.49075			0.69	0.555607			0.69	0.503513			2	0.46528
	2.005	0.65955			2.005	0.60219			2.005	0.49152			0.691	0.555486			0.691	0.503362			2.005	0.46583
	2.01	0.66038			2.01	0.61193			2.01	0.49355			0.692	0.555346			0.692	0.503226			2.01	0.46771
	2.015	0.65983			2.015	0.62142			2.015	0.49504			0.693	0.555205			0.693	0.503063			2.015	0.46908
	2.02	0.66004			2.02	0.63043			2.02	0.4965			0.694	0.555068			0.694	0.502895			2.02	0.47127
	2.025	0.6608			2.025	0.63954			2.025	0.49697			0.695	0.554915			0.695	0.502734			2.025	0.47271
	2.03	0.66055			2.03	0.64612			2.03	0.49852			0.696	0.554793			0.696	0.502574			2.03	0.47434
	2.035	0.66129			2.035	0.65423			2.035	0.49991			0.697	0.554673			0.697	0.502418			2.035	0.47737
	2.04	0.66292			2.04	0.65968			2.04	0.50082			0.698	0.554534			0.698	0.502261			2.04	0.47891
	2.045	0.66315			2.045	0.66432			2.045	0.50182			0.699	0.554431			0.699	0.502108			2.045	0.48031
	2.05	0.66413			2.05	0.66935			2.05	0.50415			0.7	0.554318			0.7	0.501953			2.05	0.48217
	2.055	0.66512			2.055	0.67238			2.055	0.50619			0.701	0.554194			0.701	0.501793			2.055	0.48384
	2.06	0.66658			2.06	0.67488			2.06	0.50779			0.702	0.55408			0.702	0.501611			2.06	0.48507
	2.065	0.66766			2.065	0.67769			2.065	0.50755			0.703	0.553956			0.703	0.501441			2.065	0.48618
	2.07	0.66953			2.07	0.68113			2.07	0.50754			0.704	0.553836			0.704	0.501282			2.07	0.48598
	2.075	0.67058			2.075	0.68301			2.075	0.50646			0.705	0.553713			0.705	0.501112			2.075	0.48772
	2.08	0.67225			2.08	0.68344			2.08	0.50757			0.706	0.553561			0.706	0.500913			2.08	0.48852
	2.085	0.6744			2.085	0.68252			2.085	0.50595			0.707	0.553414			0.707	0.500716			2.085	0.48872
	2.09	0.67692			2.09	0.68244			2.09	0.50227			0.708	0.553284			0.708	0.500528			2.09	0.48914
	2.095	0.67889			2.095	0.68393			2.095	0.49997			0.709	0.553156			0.709	0.500329			2.095	0.48903
	2.1	0.67991			2.1	0.68704			2.1	0.49867			0.71	0.553025			0.71	0.500148			2.1	0.48791
	2.105	0.68208			2.105	0.68567			2.105	0.49721			0.711	0.55289			0.711	0.499984			2.105	0.48689
	2.11	0.68418			2.11	0.6896			2.11	0.49682			0.712	0.552738			0.712	0.499793			2.11	0.48625
	2.115	0.68578			2.115	0.68935			2.115	0.49596			0.713	0.552581			0.713	0.499598			2.115	0.48661
	2.12	0.68852			2.12	0.69135			2.12	0.49576			0.714	0.552414			0.714	0.499396			2.12	0.48699
	2.125	0.69022			2.125	0.69098			2.125	0.49649			0.715	0.552251			0.715	0.4992			2.125	0.48711
	2.13	0.69203			2.13	0.69228			2.13	0.49472			0.716	0.552074			0.716	0.49899			2.13	0.48784
	2.135	0.6946			2.135	0.69469			2.135	0.49456			0.717	0.551894			0.717	0.498789			2.135	0.48773
	2.14	0.69753			2.14	0.69791			2.14	0.49492			0.718	0.551716			0.718	0.498609			2.14	0.48837
	2.145	0.70026			2.145	0.69866			2.145	0.49674			0.719	0.551534			0.719	0.498386			2.145	0.48856
	2.15	0.70365			2.15	0.69865			2.15	0.5			0.72	0.551344			0.72	0.498158			2.15	0.48858
	2.155	0.70684			2.155	0.70048			2.155	0.50164			0.721	0.551149			0.721	0.49793			2.155	0.48872
	2.16	0.70832			2.16	0.69943			2.16	0.50338			0.722	0.550974			0.722	0.497711			2.16	0.4881
	2.165	0.70924			2.165	0.69933			2.165	0.50264			0.723	0.550784			0.723	0.497483			2.165	0.48763
	2.17	0.70997			2.17	0.6982			2.17	0.50265			0.724	0.550576			0.724	0.497246			2.17	0.48721
	2.175	0.71005			2.175	0.69783			2.175	0.50452			0.725	0.550333			0.725	0.496994			2.175	0.48718
	2.18	0.71016			2.18	0.70067			2.18	0.50239			0.726	0.550102			0.726	0.496749			2.18	0.48652
	2.185	0.70971			2.185	0.70221			2.185	0.50266			0.727	0.549867			0.727	0.496497			2.185	0.48505
	2.19	0.70829			2.19	0.70175			2.19	0.50252			0.728	0.549622			0.728	0.496233			2.19	0.48533
	2.195	0.70627			2.195	0.70144			2.195	0.50147			0.729	0.549403			0.729	0.495976			2.195	0.48388
	2.2	0.70324			2.2	0.70159			2.2	0.50013			0.73	0.54917			0.73	0.495727			2.2	0.48131
	2.205	0.70033			2.205	0.70018			2.205	0.50089			0.731	0.548922			0.731	0.495484			2.205	0.47991
	2.21	0.6956			2.21	0.70053			2.21	0.49785			0.732	0.548664			0.732	0.495246			2.21	0.47849
	2.215	0.69172			2.215	0.70067			2.215	0.49529			0.733	0.548387			0.733	0.494985			2.215	0.47581
	2.22	0.68554			2.22	0.69854			2.22	0.49411			0.734	0.548115			0.734	0.494715			2.22	0.47227
	2.225	0.67926			2.225	0.69494			2.225	0.4906			0.735	0.547877			0.735	0.494448			2.225	0.46681
	2.23	0.67147			2.23	0.69233			2.23	0.48546			0.736	0.547587			0.736	0.494179			2.23	0.4598
	2.2317	0.67058			2.235	0.68838			2.235	0.4764			0.737	0.547297			0.737	0.493907			2.235	0.44936
	2.2326	0.66936			2.24	0.68707			2.24	0.46787			0.738	0.547019			0.738	0.493629			2.24	0.43704
	2.2336	0.66742			2.245	0.68613			2.245	0.45996			0.739	0.546733			0.739	0.493351			2.245	0.42871
	2.2345	0.66483			2.25	0.6853			2.25	0.45678			0.74	0.546431			0.74	0.493069			2.25	0.42475
	2.2355	0.66394			2.255	0.68125			2.255	0.45261			0.741	0.546122			0.741	0.492787			2.255	0.42471
	2.2365	0.66182			2.26	0.67704			2.26	0.45308			0.742	0.545812			0.742	0.492495			2.26	0.42678
	2.2374	0.66061			2.265	0.66712			2.265	0.44667			0.743	0.545477			0.743	0.492163			2.265	0.42737
	2.2384	0.65877			2.27	0.65647			2.27	0.43496			0.744	0.545146			0.744	0.491834			2.27	0.42739
	2.2394	0.65696			2.275	0.64037			2.275	0.42958			0.745	0.544829			0.745	0.491534			2.275	0.42666
	2.2403	0.65544			2.28	0.61406			2.28	0.42682			0.746	0.544521			0.746	0.491247			2.28	0.42329
	2.2413	0.65389			2.285	0.57339			2.285	0.42309			0.747	0.544183			0.747	0.490944			2.285	0.41466
	2.2423	0.65154			2.29	0.53167			2.29	0.41727			0.748	0.543804			0.748	0.490618			2.29	0.4025
	2.2432	0.64942			2.295	0.51496			2.295	0.40985			0.749	0.543439			0.749	0.490304			2.295	0.39237
	2.2442	0.64732			2.3	0.52047			2.3	0.40524			0.75	0.543047			0.75	0.489963			2.3	0.38748
	2.2452	0.64612			2.305	0.50779			2.305	0.39795			0.751	0.542645			0.751	0.489613			2.305	0.38645
	2.2462	0.64426			2.31	0.4606			2.31	0.38729			0.752	0.542224			0.752	0.489258			2.31	0.38462
	2.2471	0.64203			2.315	0.43188			2.315	0.37537			0.753	0.54182			0.753	0.488918			2.315	0.37892
	2.2481	0.63965			2.32	0.44015			2.32	0.36119			0.754	0.54141			0.754	0.488569			2.32	0.37107
	2.2491	0.63764			2.325	0.47847			2.325	0.35226			0.755	0.540985			0.755	0.4882			2.325	0.3667
	2.2501	0.63606			2.33	0.52404			2.33	0.35			0.756	0.540527			0.756	0.487849			2.33	0.36445
	2.251	0.63493			2.335	0.55367			2.335	0.35076			0.757	0.540053			0.757	0.487485			2.335	0.36522
	2.252	0.63311			2.34	0.56775			2.34	0.35627			0.758	0.539566			0.758	0.487101			2.34	0.36869
	2.253	0.63186			2.345	0.575			2.345	0.37188			0.759	0.539094			0.759	0.486705			2.345	0.3738
	2.254	0.63023			2.35	0.57273			2.35	0.39023			0.76	0.538632			0.76	0.486317			2.35	0.37999
	2.255	0.62931			2.355	0.56783			2.355	0.40296			0.761	0.538172			0.761	0.485934			2.355	0.38599
	2.2559	0.62752			2.36	0.56046			2.36	0.40998			0.762	0.537678			0.762	0.485532			2.36	0.39256
	2.2569	0.62583			2.365	0.55339			2.365	0.41242			0.763	0.53717			0.763	0.485134			2.365	0.3995
	2.2579	0.62432			2.37	0.53896			2.37	0.40957			0.764	0.53665			0.764	0.484733			2.37	0.4061
	2.2589	0.623			2.375	0.51829			2.375	0.40414			0.765	0.53612			0.765	0.484324			2.375	0.4114
	2.2599	0.62155			2.38	0.49827			2.38	0.39988			0.766	0.5356			0.766	0.48391			2.38	0.41352
	2.2609	0.62025			2.385	0.47997			2.385	0.39809			0.767	0.535069			0.767	0.48349			2.385	0.41274
	2.2618	0.61882			2.39	0.46994			2.39	0.39596			0.768	0.534525			0.768	0.483063			2.39	0.41277
	2.2628	0.6173			2.395	0.46986			2.395	0.39424			0.769	0.533942			0.769	0.482605			2.395	0.41369
	2.2638	0.61556			2.4	0.4796			2.4	0.39189			0.77	0.53334			0.77	0.482141			2.4	0.41651
	2.2648	0.61513			2.405	0.49462			2.405	0.39307			0.771	0.532731			0.771	0.48168			2.405	0.42173
	2.2658	0.61473			2.41	0.49942			2.41	0.39126			0.772	0.532151			0.772	0.481243			2.41	0.427
	2.2668	0.61472			2.415	0.49567			2.415	0.38998			0.773	0.531523			0.773	0.480784			2.415	0.43021
	2.2678	0.61301			2.42	0.48528			2.42	0.38704			0.774	0.530875			0.774	0.480307			2.42	0.43077
	2.2688	0.61176			2.425	0.47534			2.425	0.38371			0.775	0.530218			0.775	0.47981			2.425	0.42723
	2.2698	0.61151			2.43	0.46765			2.43	0.3815			0.776	0.529597			0.776	0.479348			2.43	0.42432
	2.2708	0.61052			2.435	0.45901			2.435	0.37579			0.777	0.528953			0.777	0.478876			2.435	0.42149
	2.2718	0.60874			2.44	0.45756			2.44	0.37457			0.778	0.528285			0.778	0.478393			2.44	0.41932
	2.2727	0.60816			2.445	0.45044			2.445	0.37628			0.779	0.527602			0.779	0.477901			2.445	0.41736
	2.2737	0.60777			2.45	0.44351			2.45	0.37918			0.78	0.526908			0.78	0.477395			2.45	0.41489
	2.2747	0.60757			2.455	0.43646			2.455	0.3819			0.781	0.526193			0.781	0.476873			2.455	0.41
	2.2757	0.607			2.46	0.42605			2.46	0.3833			0.782	0.52542			0.782	0.476322			2.46	0.40622
	2.2767	0.60555			2.465	0.42141			2.465	0.38223			0.783	0.524676			0.783	0.475796			2.465	0.40259
	2.2777	0.60425			2.47	0.41663			2.47	0.37868			0.784	0.523949			0.784	0.475279			2.47	0.4007
	2.2787	0.60445			2.475	0.41708			2.475	0.37363			0.785	0.523239			0.785	0.474769			2.475	0.39923
	2.2797	0.60346			2.48	0.41409			2.48	0.36765			0.786	0.522453			0.786	0.47421			2.48	0.39985
	2.2807	0.60213			2.485	0.40769			2.485	0.36343			0.787	0.521669			0.787	0.473659			2.485	0.4009
	2.2817	0.60016			2.49	0.40185			2.49	0.35997			0.788	0.520893			0.788	0.473122			2.49	0.4012
	2.2828	0.5993			2.495	0.39736			2.495	0.35682			0.789	0.520083			0.789	0.472567			2.495	0.40129
	2.2838	0.59865			2.5	0.39413			2.5	0.34973			0.79	0.51928			0.79	0.472019			2.5	0.40092
	2.2848	0.59827			2.505	0.38978			2.502	0.34845			0.791	0.518483			0.791	0.47148			2.502	0.40095
	2.2858	0.59758			2.51	0.38582			2.5032	0.3471			0.792	0.517681			0.792	0.470946			2.5032	0.40122
	2.2868	0.59736			2.515	0.37963			2.5044	0.34525			0.793	0.516832			0.793	0.470354			2.5044	0.40095
	2.2878	0.59654			2.52	0.37759			2.5056	0.34405			0.794	0.515984			0.794	0.469766			2.5056	0.40074
	2.2888	0.59477			2.525	0.37357			2.5068	0.3434			0.795	0.515163			0.795	0.469218			2.5068	0.40069
	2.2898	0.59342			2.53	0.36896			2.508	0.34301			0.796	0.514288			0.796	0.468647			2.508	0.40098
	2.2908	0.59284			2.535	0.36726			2.5093	0.34243			0.797	0.513411			0.797	0.468061			2.5093	0.40121
	2.2918	0.59171			2.54	0.36813			2.5105	0.34218			0.798	0.512538			0.798	0.467462			2.5105	0.40113
	2.2929	0.59097			2.545	0.36191			2.5117	0.34216			0.799	0.511657			0.799	0.466851			2.5117	0.4011
	2.2939	0.58966			2.55	0.3609			2.5129	0.34259			0.8	0.510764			0.8	0.466231			2.5129	0.40086
	2.2949	0.58866			2.555	0.36204			2.5141	0.34316			0.801	0.509841			0.801	0.465593			2.5141	0.40096
	2.2959	0.58771			2.56	0.34503			2.5153	0.34379			0.802	0.50888			0.802	0.464946			2.5153	0.40116
	2.2969	0.58722			2.565	0.35321			2.5166	0.34425			0.803	0.507923			0.803	0.464334			2.5166	0.40119
	2.2979	0.58606			2.57	0.34838			2.5178	0.34492			0.804	0.506959			0.804	0.463705			2.5178	0.40111
	2.299	0.58525			2.575	0.34329			2.519	0.34596			0.805	0.505985			0.805	0.463037			2.519	0.40114
	2.3	0.58503			2.58	0.34587			2.5202	0.34724			0.806	0.504989			0.806	0.462373			2.5202	0.40133
	2.301	0.5842			2.585	0.33683			2.5215	0.34809			0.807	0.503973			0.807	0.461711			2.5215	0.40124
	2.302	0.58297			2.59	0.34589			2.5227	0.3489			0.808	0.502937			0.808	0.46105			2.5227	0.40121
	2.303	0.58263			2.595	0.32917			2.5239	0.35			0.809	0.501917			0.809	0.4604			2.5239	0.40119
	2.3041	0.58194			2.6	0.34378			2.5252	0.35121			0.81	0.500884			0.81	0.459741			2.5252	0.40098
	2.3051	0.58122							2.5264	0.35196			0.811	0.499845			0.811	0.459077			2.5264	0.40091
	2.3061	0.58108							2.5276	0.3526			0.812	0.498808			0.812	0.458406			2.5276	0.40117
	2.3071	0.58188							2.5288	0.35343			0.813	0.49776			0.813	0.45773			2.5288	0.40148
	2.3082	0.58134							2.5301	0.35464			0.814	0.496709			0.814	0.457052			2.5301	0.40159
	2.3092	0.58047							2.5313	0.35504			0.815	0.49567			0.815	0.456384			2.5313	0.40152
	2.3102	0.58043							2.5326	0.35528			0.816	0.4946			0.816	0.45565			2.5326	0.40149
	2.3113	0.58186							2.5338	0.35527			0.817	0.493515			0.817	0.454919			2.5338	0.40152
	2.3123	0.58262							2.535	0.35568			0.818	0.492426			0.818	0.454199			2.535	0.40156
	2.3133	0.58365							2.5363	0.35556			0.819	0.491373			0.819	0.453499			2.5363	0.40162
	2.3143	0.58397							2.5375	0.35554			0.82	0.49029			0.82	0.452788			2.5375	0.40189
	2.3154	0.58463							2.5388	0.3555			0.821	0.489189			0.821	0.452067			2.5388	0.40178
	2.3164	0.58514							2.54	0.35545			0.822	0.488084			0.822	0.451338			2.54	0.4017
	2.3174	0.58584							2.5412	0.35517			0.823	0.486971			0.823	0.45059			2.5412	0.40164
	2.3185	0.58691							2.5425	0.35503			0.824	0.485858			0.824	0.449838			2.5425	0.40181
	2.3195	0.5889							2.5437	0.35511			0.825	0.484747			0.825	0.449087			2.5437	0.40176
	2.3206	0.59003							2.545	0.35531			0.826	0.483661			0.826	0.448392			2.545	0.40193
	2.3216	0.5919							2.5462	0.35539			0.827	0.482547			0.827	0.447679			2.5462	0.40204
	2.3226	0.59345							2.5475	0.35527			0.828	0.481413			0.828	0.446951			2.5475	0.40177
	2.3237	0.59571							2.5487	0.35489			0.829	0.4803			0.829	0.446246			2.5487	0.40134
	2.3247	0.59773							2.55	0.35461			0.83	0.479184			0.83	0.445516			2.55	0.4012
	2.3258	0.59916							2.5512	0.3543			0.831	0.478064			0.831	0.444765			2.5512	0.40089
	2.3268	0.60063							2.5525	0.35361			0.832	0.476937			0.832	0.443997			2.5525	0.40092
	2.3279	0.60229							2.5538	0.35296			0.833	0.475842			0.833	0.443276			2.5538	0.40077
	2.3289	0.60446							2.555	0.35263			0.834	0.474742			0.834	0.442545			2.555	0.40075
	2.3299	0.60699							2.5563	0.35201			0.835	0.473641			0.835	0.4418			2.5563	0.40076
	2.331	0.60869							2.5575	0.35143			0.836	0.472576			0.836	0.441062			2.5575	0.40057
	2.332	0.61111							2.5588	0.35096			0.837	0.471492			0.837	0.44034			2.5588	0.40013
	2.3331	0.61319							2.5601	0.35052			0.838	0.470393			0.838	0.439626			2.5601	0.39957
	2.3341	0.61567							2.5613	0.3505			0.839	0.469286			0.839	0.438883			2.5613	0.39952
	2.3352	0.61738							2.5626	0.35081			0.84	0.46818			0.84	0.438158			2.5626	0.39995
	2.3362	0.61947							2.5639	0.35133			0.841	0.467068			0.841	0.437432			2.5639	0.40003
	2.3373	0.6215							2.5651	0.35191			0.842	0.465951			0.842	0.436688			2.5651	0.4001
	2.3384	0.62395							2.5664	0.3524			0.843	0.464872			0.843	0.435977			2.5664	0.39994
	2.3394	0.62542							2.5677	0.35326			0.844	0.463811			0.844	0.435262			2.5677	0.39977
	2.3405	0.62591							2.5689	0.35413			0.845	0.462764			0.845	0.43453			2.5689	0.39997
	2.3415	0.62786							2.5702	0.3549			0.846	0.461682			0.846	0.433801			2.5702	0.39998
	2.3426	0.63039							2.5715	0.35534			0.847	0.460611			0.847	0.433098			2.5715	0.39993
	2.3436	0.63094							2.5728	0.35588			0.848	0.459545			0.848	0.432408			2.5728	0.40008
	2.3447	0.6325							2.574	0.35666			0.849	0.458474			0.849	0.431683			2.574	0.40014
	2.3458	0.63344							2.5753	0.35749			0.85	0.457437			0.85	0.430979			2.5753	0.40065
	2.3468	0.63446							2.5766	0.35827			0.851	0.456419			0.851	0.430291			2.5766	0.40096
	2.3479	0.63495							2.5779	0.3589			0.852	0.455425			0.852	0.429627			2.5779	0.40091
	2.349	0.63513							2.5792	0.35937			0.853	0.454416			0.853	0.428945			2.5792	0.40079
	2.35	0.63459							2.5805	0.35975			0.854	0.453401			0.854	0.428257			2.5805	0.40136
	2.3511	0.63482							2.5817	0.36011			0.855	0.452386			0.855	0.427564			2.5817	0.40176
	2.3521	0.63421							2.583	0.36051			0.856	0.451386			0.856	0.426867			2.583	0.40214
	2.3532	0.63428							2.5843	0.36085			0.857	0.450397			0.857	0.42617			2.5843	0.40267
	2.3543	0.63408							2.5856	0.36137			0.858	0.449418			0.858	0.425477			2.5856	0.40307
	2.3554	0.63383							2.5869	0.36237			0.859	0.448458			0.859	0.424833			2.5869	0.40356
	2.3564	0.63323							2.5882	0.36317			0.86	0.447504			0.86	0.424187			2.5882	0.40408
	2.3575	0.63296							2.5895	0.36362			0.861	0.446546			0.861	0.423529			2.5895	0.40452
	2.3586	0.63293							2.5908	0.36444			0.862	0.445591			0.862	0.422856			2.5908	0.40484
	2.3596	0.63246							2.5921	0.36513			0.863	0.444641			0.863	0.42222			2.5921	0.40522
	2.3607	0.63087							2.5934	0.3655			0.864	0.443693			0.864	0.421593			2.5934	0.40582
	2.3618	0.6299							2.5947	0.36612			0.865	0.442751			0.865	0.420975			2.5947	0.40627
	2.3629	0.62854							2.596	0.36696			0.866	0.441839			0.866	0.42035			2.596	0.40652
	2.3639	0.62675							2.5973	0.36745			0.867	0.440942			0.867	0.419732			2.5973	0.40672
	2.365	0.62544							2.5986	0.36775			0.868	0.440057			0.868	0.419115			2.5986	0.40714
	2.3661	0.62482							2.5999	0.36784			0.869	0.439195			0.869	0.418493			2.5999	0.40752
	2.3672	0.62425							2.6012	0.36788			0.87	0.438368			0.87	0.417876			2.6012	0.40811
	2.3683	0.62302							2.6025	0.36788			0.871	0.437538			0.871	0.417259			2.6025	0.40863
	2.3693	0.62164							2.6038	0.36785			0.872	0.436679			0.872	0.41664			2.6038	0.40905
	2.3704	0.62061							2.6051	0.36787			0.873	0.435846			0.873	0.41602			2.6051	0.40941
	2.3715	0.61996							2.6064	0.36804			0.874	0.43503			0.874	0.415399			2.6064	0.40998
	2.3726	0.6198							2.6077	0.36825			0.875	0.434229			0.875	0.414782			2.6077	0.41039
	2.3737	0.61895							2.609	0.3686			0.876	0.433456			0.876	0.41424			2.609	0.41076
	2.3748	0.61726							2.6103	0.3685			0.877	0.432653			0.877	0.413674			2.6103	0.41129
	2.3759	0.61603							2.6117	0.36871			0.878	0.431848			0.878	0.413103			2.6117	0.412
	2.377	0.61548							2.613	0.36868			0.879	0.431114			0.879	0.412573			2.613	0.41242
	2.378	0.61422							2.6143	0.3688			0.88	0.430356			0.88	0.412035			2.6143	0.41299
	2.3791	0.61303							2.6156	0.36888			0.881	0.429617			0.881	0.411493			2.6156	0.41337
	2.3802	0.61114							2.6169	0.36876			0.882	0.428935			0.882	0.410958			2.6169	0.4135
	2.3813	0.61029							2.6183	0.3691			0.883	0.42827			0.883	0.410437			2.6183	0.41351
	2.3824	0.60958							2.6196	0.36961			0.884	0.427608			0.884	0.409928			2.6196	0.41417
	2.3835	0.60829							2.6209	0.36945			0.885	0.426949			0.885	0.409434			2.6209	0.41457
	2.3846	0.60596							2.6222	0.36942			0.886	0.426335			0.886	0.408987			2.6222	0.41467
	2.3857	0.60404							2.6236	0.36934			0.887	0.425713			0.887	0.408541			2.6236	0.41517
	2.3868	0.60257							2.6249	0.36949			0.888	0.42509			0.888	0.408092			2.6249	0.41561
	2.3879	0.60243							2.6262	0.36927			0.889	0.424491			0.889	0.407632			2.6262	0.41561
	2.389	0.60147							2.6275	0.36896			0.89	0.423923			0.89	0.407214			2.6275	0.41533
	2.3901	0.60022							2.6289	0.36848			0.891	0.423362			0.891	0.406783			2.6289	0.41536
	2.3912	0.59856							2.6302	0.36815			0.892	0.422797			0.892	0.406307			2.6302	0.41578
	2.3923	0.59741							2.6315	0.36758			0.893	0.422261			0.893	0.405907			2.6315	0.41592
	2.3934	0.59631							2.6329	0.36726			0.894	0.421759			0.894	0.405518			2.6329	0.41598
	2.3945	0.59435							2.6342	0.36647			0.895	0.421285			0.895	0.405136			2.6342	0.41609
	2.3956	0.59235							2.6356	0.36571			0.896	0.420775			0.896	0.404761			2.6356	0.41582
	2.3967	0.59125							2.6369	0.3649			0.897	0.420319			0.897	0.404386			2.6369	0.4158
	2.3978	0.58886							2.6382	0.36384			0.898	0.419892			0.898	0.404008			2.6382	0.41569
	2.399	0.58767							2.6396	0.36231			0.899	0.41946			0.899	0.403614			2.6396	0.41536
	2.4001	0.58685							2.6409	0.36095			0.9	0.419061			0.9	0.403241			2.6409	0.41512
	2.4012	0.58532							2.6423	0.35954			0.901	0.418682			0.901	0.402883			2.6423	0.41479
	2.4023	0.58367							2.6436	0.35782			0.902	0.418337			0.902	0.402554			2.6436	0.41451
	2.4034	0.58307							2.645	0.35557			0.903	0.417977			0.903	0.402221			2.645	0.41415
	2.4045	0.5818							2.6463	0.35321			0.904	0.417621			0.904	0.40189			2.6463	0.41433
	2.4056	0.58005							2.6477	0.35052			0.905	0.417276			0.905	0.401564			2.6477	0.41408
	2.4067	0.57848							2.649	0.3479			0.906	0.416988			0.906	0.401267			2.649	0.41363
	2.4079	0.57708							2.6504	0.345			0.907	0.416708			0.907	0.400986			2.6504	0.413
	2.409	0.57531							2.6517	0.34246			0.908	0.416435			0.908	0.400705			2.6517	0.41272
	2.4101	0.57346							2.6531	0.33976			0.909	0.416182			0.909	0.400403			2.6531	0.41247
	2.4112	0.57131							2.6544	0.33762			0.91	0.415966			0.91	0.400128			2.6544	0.41203
	2.4123	0.56973							2.6558	0.33575			0.911	0.415746			0.911	0.399864			2.6558	0.41166
	2.4135	0.56878							2.6572	0.33432			0.912	0.415501			0.912	0.39961			2.6572	0.41145
	2.4146	0.56753							2.6585	0.33271			0.913	0.415317			0.913	0.399361			2.6585	0.41093
	2.4157	0.56562							2.6599	0.33104			0.914	0.415128			0.914	0.399142			2.6599	0.41045
	2.4168	0.56353							2.6613	0.32891			0.915	0.414944			0.915	0.398947			2.6613	0.41006
	2.418	0.56162							2.6626	0.32645			0.916	0.414841			0.916	0.398742			2.6626	0.40965
	2.4191	0.56013							2.664	0.32374			0.917	0.414768			0.917	0.398573			2.664	0.40916
	2.4202	0.55847							2.6654	0.32122			0.918	0.414713			0.918	0.398423			2.6654	0.40832
	2.4214	0.55677							2.6667	0.31783			0.919	0.41467			0.919	0.39828			2.6667	0.40726
	2.4225	0.55441							2.6681	0.31399			0.92	0.414585			0.92	0.398067			2.6681	0.40654
	2.4236	0.55171							2.6695	0.30933			0.921	0.414519			0.921	0.397884			2.6695	0.40565
	2.4248	0.54958							2.6709	0.30424			0.922	0.414484			0.922	0.39776			2.6709	0.40452
	2.4259	0.54863							2.6722	0.29716			0.923	0.414496			0.923	0.397637			2.6722	0.40296
	2.427	0.54645							2.6736	0.28946			0.924	0.414497			0.924	0.397513			2.6736	0.40148
	2.4282	0.54437							2.675	0.28028			0.925	0.414498			0.925	0.397394			2.675	0.39944
	2.4293	0.54271							2.6764	0.26965			0.926	0.414563			0.926	0.397314			2.6764	0.39768
	2.4304	0.54041							2.6778	0.2568			0.927	0.41463			0.927	0.397237			2.6778	0.39536
	2.4316	0.5378							2.6791	0.2427			0.928	0.414702			0.928	0.397161			2.6791	0.39276
	2.4327	0.53547							2.6805	0.22735			0.929	0.414793			0.929	0.397092			2.6805	0.3905
	2.4339	0.53298							2.6819	0.21205			0.93	0.414861			0.93	0.396983			2.6819	0.38801
	2.435	0.53051							2.6833	0.19757			0.931	0.414953			0.931	0.396891			2.6833	0.3853
	2.4362	0.52825							2.6847	0.18312			0.932	0.415086			0.932	0.396835			2.6847	0.38203
	2.4373	0.52662							2.6861	0.16864			0.933	0.415258			0.933	0.396823			2.6861	0.37885
	2.4384	0.52443							2.6875	0.15499			0.934	0.415418			0.934	0.396814			2.6875	0.37585
	2.4396	0.52198							2.6889	0.14156			0.935	0.415576			0.935	0.396799			2.6889	0.37245
	2.4407	0.51904							2.6903	0.12885			0.936	0.415808			0.936	0.396785			2.6903	0.36877
	2.4419	0.51664							2.6917	0.11612			0.937	0.416034			0.937	0.396787			2.6917	0.36452
	2.443	0.51398							2.6931	0.10422			0.938	0.416255			0.938	0.39679			2.6931	0.36027
	2.4442	0.5119							2.6945	0.09234			0.939	0.416473			0.939	0.396777			2.6945	0.35575
	2.4453	0.50995							2.6959	0.08063			0.94	0.416743			0.94	0.396815			2.6959	0.35085
	2.4465	0.50879							2.6973	0.06879			0.941	0.417035			0.941	0.396855			2.6973	0.34502
	2.4477	0.50671							2.6987	0.0568			0.942	0.417344			0.942	0.396889			2.6987	0.33905
	2.4488	0.5043							2.7001	0.04532			0.943	0.417641			0.943	0.396933			2.7001	0.33279
	2.45	0.50245							2.7015	0.03685			0.944	0.417997			0.944	0.397011			2.7015	0.3259
	2.4511	0.50115							2.7029	0.03181			0.945	0.418385			0.945	0.397108			2.7029	0.31746
	2.4523	0.49871							2.7043	0.0288			0.946	0.418706			0.946	0.397177			2.7043	0.30662
	2.4534	0.49663							2.7057	0.02602			0.947	0.419086			0.947	0.397237			2.7057	0.29105
	2.4546	0.49474							2.7071	0.02371			0.948	0.419481			0.948	0.397313			2.7071	0.26912
	2.4558	0.49337							2.7085	0.02162			0.949	0.419857			0.949	0.397433			2.7085	0.24214
	2.4569	0.49207							2.71	0.02006			0.95	0.420249			0.95	0.397516			2.71	0.21385
	2.4581	0.49078							2.7114	0.01891			0.951	0.420668			0.951	0.397625			2.7114	0.18813
	2.4593	0.48917							2.7128	0.01841			0.952	0.421102			0.952	0.397753			2.7128	0.16761
	2.4604	0.48768							2.7142	0.01859			0.953	0.421609			0.953	0.397877			2.7142	0.15306
	2.4616	0.48667							2.7156	0.01919			0.954	0.422087			0.954	0.398034			2.7156	0.14385
	2.4628	0.48645							2.7171	0.01994			0.955	0.422564			0.955	0.398218			2.7171	0.1382
	2.4639	0.48497							2.7185	0.02081			0.956	0.423081			0.956	0.39838			2.7185	0.13462
	2.4651	0.48381							2.7199	0.02183			0.957	0.423525			0.957	0.398535			2.7199	0.13216
	2.4663	0.48279							2.7213	0.02316			0.958	0.423986			0.958	0.398683			2.7213	0.13078
	2.4675	0.48197							2.7228	0.02429			0.959	0.424548			0.959	0.398836			2.7228	0.12997
	2.4686	0.48053							2.7242	0.02519			0.96	0.425063			0.96	0.398989			2.7242	0.12968
	2.4698	0.4793							2.7256	0.02629			0.961	0.425571			0.961	0.399135			2.7256	0.12967
	2.471	0.47753							2.7271	0.02745			0.962	0.426086			0.962	0.399282			2.7271	0.12963
	2.4722	0.47722							2.7285	0.02818			0.963	0.426704			0.963	0.39952			2.7285	0.12922
	2.4733	0.47691							2.7299	0.02891			0.964	0.427287			0.964	0.399734			2.7299	0.12858
	2.4745	0.47564							2.7314	0.02958			0.965	0.427845			0.965	0.399928			2.7314	0.12766
	2.4757	0.47451							2.7328	0.03027			0.966	0.428387			0.966	0.400109			2.7328	0.12644
	2.4769	0.47308							2.7342	0.03098			0.967	0.429003			0.967	0.400346			2.7342	0.12493
	2.4781	0.47205							2.7357	0.03168			0.968	0.4296			0.968	0.400568			2.7357	0.12342
	2.4793	0.47185							2.7371	0.03214			0.969	0.430101			0.969	0.400713			2.7371	0.12205
	2.4804	0.47134							2.7386	0.03264			0.97	0.430743			0.97	0.400921			2.7386	0.12048
	2.4816	0.47022							2.74	0.03334			0.971	0.4314			0.971	0.401168			2.74	0.11872
	2.4828	0.46915							2.7415	0.03397			0.972	0.432057			0.972	0.401451			2.7415	0.11704
	2.484	0.46824							2.7429	0.0348			0.973	0.432599			0.973	0.401629			2.7429	0.1153
	2.4852	0.46728							2.7444	0.03581			0.974	0.433182			0.974	0.401813			2.7444	0.11369
	2.4864	0.46601							2.7458	0.03665			0.975	0.433785			0.975	0.401993			2.7458	0.11189
	2.4876	0.46443							2.7473	0.03759			0.976	0.434358			0.976	0.402137			2.7473	0.1099
	2.4888	0.46358							2.7487	0.03877			0.977	0.434998			0.977	0.402342			2.7487	0.10814
	2.49	0.46284							2.7502	0.04011			0.978	0.435658			0.978	0.402575			2.7502	0.10629
	2.4912	0.46154							2.7517	0.04138			0.979	0.436308			0.979	0.402818			2.7517	0.10445
	2.4924	0.45974							2.7531	0.04274			0.98	0.436866			0.98	0.402954			2.7531	0.10264
	2.4936	0.45896							2.7546	0.04402			0.981	0.437469			0.981	0.403148			2.7546	0.10093
	2.4948	0.45878							2.7561	0.04513			0.982	0.438121			0.982	0.403408			2.7561	0.09943
	2.496	0.45826							2.7575	0.0461			0.983	0.438692			0.983	0.40365			2.7575	0.09781
	2.4972	0.45721							2.759	0.04722			0.984	0.439291			0.984	0.403855			2.759	0.09636
	2.4984	0.45606							2.7605	0.04823			0.985	0.439913			0.985	0.404054			2.7605	0.09494
	2.4996	0.45511							2.7619	0.04911			0.986	0.440529			0.986	0.404286			2.7619	0.09366
	2.5008	0.4552							2.7634	0.05004			0.987	0.441201			0.987	0.404541			2.7634	0.09217
	2.502	0.4549							2.7649	0.05095			0.988	0.441849			0.988	0.404771			2.7649	0.0906
	2.5032	0.45401							2.7663	0.05164			0.989	0.442411			0.989	0.404937			2.7663	0.08919
	2.5044	0.45352							2.7678	0.05217			0.99	0.443057			0.99	0.405148			2.7678	0.08773
	2.5056	0.45443							2.7693	0.05275			0.991	0.443665			0.991	0.405364			2.7693	0.08607
	2.5068	0.45485							2.7708	0.05342			0.992	0.444229			0.992	0.405577			2.7708	0.08433
	2.508	0.45529							2.7723	0.05386			0.993	0.444844			0.993	0.405794			2.7723	0.08271
	2.5093	0.45616							2.7737	0.05439			0.994	0.445454			0.994	0.406065			2.7737	0.0811
	2.5105	0.45747							2.7752	0.05495			0.995	0.446041			0.995	0.406334			2.7752	0.07951
	2.5117	0.45893							2.7767	0.05537			0.996	0.446572			0.996	0.406516			2.7767	0.07795
	2.5129	0.46024							2.7782	0.05564			0.997	0.447161			0.997	0.406705			2.7782	0.07622
	2.5141	0.46166							2.7797	0.05601			0.998	0.447769			0.998	0.406914			2.7797	0.07469
	2.5153	0.46403							2.7812	0.05654			0.999	0.448365			0.999	0.407136			2.7812	0.0734
	2.5166	0.4663							2.7827	0.05708			1	0.44894			1	0.407317			2.7827	0.07208
	2.5178	0.46889							2.7842	0.0575			1.001	0.44894			1.001	0.407317			2.7842	0.07079
	2.519	0.47143							2.7857	0.05787			1.002	0.449443			1.002	0.407482			2.7857	0.06973
	2.5202	0.47443							2.7872	0.05858			1.003	0.449948			1.003	0.407652			2.7872	0.06909
	2.5215	0.47738							2.7887	0.05936			1.004	0.450449			1.004	0.40779			2.7887	0.06833
	2.5227	0.48108							2.7902	0.05987			1.005	0.450926			1.005	0.407901			2.7902	0.06755
	2.5239	0.48492							2.7917	0.0602			1.006	0.45138			1.006	0.408018			2.7917	0.06701
	2.5252	0.48846							2.7932	0.06055			1.007	0.451857			1.007	0.408147			2.7932	0.06641
	2.5264	0.49216							2.7947	0.06098			1.008	0.45234			1.008	0.408239			2.7947	0.06602
	2.5276	0.49641							2.7962	0.06153			1.009	0.452817			1.009	0.408305			2.7962	0.0657
	2.5288	0.5002							2.7977	0.0621			1.01	0.453307			1.01	0.408403			2.7977	0.06548
	2.5301	0.50467							2.7992	0.06259			1.011	0.453792			1.011	0.408503			2.7992	0.06517
	2.5313	0.50931							2.8007	0.06301			1.012	0.454222			1.012	0.408582			2.8007	0.06511
	2.5326	0.51477							2.8022	0.06342			1.013	0.454641			1.013	0.408684			2.8022	0.06521
	2.5338	0.51879							2.8038	0.06395			1.014	0.455075			1.014	0.408789			2.8038	0.06522
	2.535	0.52258							2.8053	0.06443			1.015	0.455502			1.015	0.408873			2.8053	0.06509
	2.5363	0.52709							2.8068	0.06485			1.016	0.45588			1.016	0.408941			2.8068	0.06502
	2.5375	0.53296							2.8083	0.06538			1.017	0.456244			1.017	0.409008			2.8083	0.06522
	2.5388	0.53638							2.8098	0.0659			1.018	0.45662			1.018	0.409051			2.8098	0.06554
	2.54	0.53965							2.8114	0.06661			1.019	0.457008			1.019	0.409092			2.8114	0.06597
	2.5412	0.54336							2.8129	0.06748			1.02	0.457403			1.02	0.409181			2.8129	0.06622
	2.5425	0.54733							2.8144	0.06808			1.021	0.457802			1.021	0.409301			2.8144	0.06636
	2.5437	0.55049							2.8159	0.06858			1.022	0.458181			1.022	0.409416			2.8159	0.0668
	2.545	0.55277							2.8175	0.06931			1.023	0.458546			1.023	0.409485			2.8175	0.06723
	2.5462	0.55473							2.819	0.07011			1.024	0.458882			1.024	0.40954			2.819	0.06775
	2.5475	0.55687							2.8205	0.07067			1.025	0.459158			1.025	0.409568			2.8205	0.06833
	2.5487	0.55858							2.8221	0.0712			1.026	0.459448			1.026	0.409587			2.8221	0.06879
	2.55	0.5598							2.8236	0.07189			1.027	0.459795			1.027	0.409642			2.8236	0.06946
	2.5512	0.56087							2.8251	0.07283			1.028	0.460162			1.028	0.409703			2.8251	0.07013
	2.5525	0.56219							2.8267	0.07375			1.029	0.460508			1.029	0.409771			2.8267	0.07064
	2.5538	0.56319							2.8282	0.07438			1.03	0.460815			1.03	0.409843			2.8282	0.07127
	2.555	0.56401							2.8298	0.07501			1.031	0.461098			1.031	0.409914			2.8298	0.07196
	2.5563	0.56396							2.8313	0.07568			1.032	0.461394			1.032	0.409975			2.8313	0.07274
	2.5575	0.56472							2.8329	0.07625			1.033	0.461698			1.033	0.410007			2.8329	0.0734
	2.5588	0.56547							2.8344	0.07676			1.034	0.461987			1.034	0.410039			2.8344	0.07401
	2.5601	0.56658							2.836	0.07747			1.035	0.462267			1.035	0.410066			2.836	0.07455
	2.5613	0.56808							2.8375	0.07818			1.036	0.462556			1.036	0.410062			2.8375	0.07505
	2.5626	0.56949							2.8391	0.07876			1.037	0.462841			1.037	0.410081			2.8391	0.07553
	2.5639	0.56944							2.8406	0.07934			1.038	0.463085			1.038	0.410146			2.8406	0.07628
	2.5651	0.56987							2.8422	0.08002			1.039	0.463311			1.039	0.410195			2.8422	0.07702
	2.5664	0.56981							2.8437	0.08058			1.04	0.463547			1.04	0.41025			2.8437	0.07749
	2.5677	0.56924							2.8453	0.08125			1.041	0.463799			1.041	0.41032			2.8453	0.07791
	2.5689	0.56934							2.8469	0.08193			1.042	0.464063			1.042	0.410347			2.8469	0.07852
	2.5702	0.57079							2.8484	0.0825			1.043	0.464294			1.043	0.410361			2.8484	0.07895
	2.5715	0.57128							2.85	0.08292			1.044	0.464483			1.044	0.410385			2.85	0.07946
	2.5728	0.57023							2.8516	0.08325			1.045	0.464682			1.045	0.410411			2.8516	0.07997
	2.574	0.57115							2.8531	0.08391			1.046	0.464913			1.046	0.410399			2.8531	0.08032
	2.5753	0.57168							2.8547	0.08463			1.047	0.465149			1.047	0.410392			2.8547	0.08058
	2.5766	0.5706							2.8563	0.08498			1.048	0.465376			1.048	0.41041			2.8563	0.08075
	2.5779	0.57151							2.8578	0.08544			1.049	0.465587			1.049	0.410441			2.8578	0.08074
	2.5792	0.57057							2.8594	0.08603			1.05	0.465786			1.05	0.410458			2.8594	0.08088
	2.5805	0.56982							2.861	0.08663			1.051	0.465991			1.051	0.410459			2.861	0.08106
	2.5817	0.57008							2.8626	0.08715			1.052	0.466181			1.052	0.410484			2.8626	0.08113
	2.583	0.56965							2.8642	0.08766			1.053	0.466341			1.053	0.410527			2.8642	0.08137
	2.5843	0.57009							2.8657	0.08815			1.054	0.466501			1.054	0.410569			2.8657	0.08158
	2.5856	0.5714							2.8673	0.08871			1.055	0.466666			1.055	0.410602			2.8673	0.08147
	2.5869	0.56905							2.8689	0.08931			1.056	0.466823			1.056	0.41063			2.8689	0.08123
	2.5882	0.56998							2.8705	0.08984			1.057	0.466973			1.057	0.410643			2.8705	0.08112
	2.5895	0.56928							2.8721	0.09033			1.058	0.467119			1.058	0.410654			2.8721	0.081
	2.5908	0.56869							2.8737	0.09073			1.059	0.46723			1.059	0.410652			2.8737	0.0807
	2.5921	0.56802							2.8753	0.09103			1.06	0.467343			1.06	0.410652			2.8753	0.08039
	2.5934	0.56827							2.8769	0.09165			1.061	0.467537			1.061	0.410641			2.8769	0.08021
	2.5947	0.5694							2.8785	0.09218			1.062	0.467744			1.062	0.410631			2.8785	0.07986
	2.596	0.57203							2.8801	0.09254			1.063	0.467919			1.063	0.410654			2.8801	0.07944
	2.5973	0.56829							2.8817	0.09295			1.064	0.468079			1.064	0.410685			2.8817	0.07909
	2.5986	0.56503							2.8833	0.09341			1.065	0.468219			1.065	0.410707			2.8833	0.07866
	2.5999	0.56409							2.8849	0.09387			1.066	0.468349			1.066	0.410723			2.8849	0.0783
	2.6012	0.56407							2.8865	0.09424			1.067	0.468488			1.067	0.410742			2.8865	0.07776
	2.6025	0.56429							2.8881	0.09464			1.068	0.468641			1.068	0.410764			2.8881	0.07713
	2.6038	0.56404							2.8897	0.09517			1.069	0.468784			1.069	0.41077			2.8897	0.07661
	2.6051	0.56361							2.8913	0.09564			1.07	0.468934			1.07	0.410764			2.8913	0.07615
	2.6064	0.5643							2.8929	0.09606			1.071	0.469086			1.071	0.410765			2.8929	0.07569
	2.6077	0.56212							2.8945	0.09665			1.072	0.469227			1.072	0.410786			2.8945	0.075
	2.609	0.5603							2.8962	0.09707			1.073	0.469363			1.073	0.410806			2.8962	0.07471
	2.6103	0.5598							2.8978	0.09739			1.074	0.469456			1.074	0.410781			2.8978	0.07456
	2.6117	0.55972							2.8994	0.09785			1.075	0.46955			1.075	0.410758			2.8994	0.07415
	2.613	0.55835							2.901	0.09843			1.076	0.46964			1.076	0.410749			2.901	0.07377
	2.6143	0.55816							2.9027	0.09878			1.077	0.469732			1.077	0.410748			2.9027	0.07343
	2.6156	0.5574							2.9043	0.09907			1.078	0.469807			1.078	0.410717			2.9043	0.07305
	2.6169	0.55773							2.9059	0.09938			1.079	0.469872			1.079	0.410669			2.9059	0.07264
	2.6183	0.55833							2.9075	0.09975			1.08	0.469966			1.08	0.410647			2.9075	0.0725
	2.6196	0.55534							2.9092	0.10031			1.081	0.470087			1.081	0.410651			2.9092	0.07246
	2.6209	0.55499							2.9108	0.10091			1.082	0.470192			1.082	0.410649			2.9108	0.07242
	2.6222	0.55516							2.9124	0.10123			1.083	0.47028			1.083	0.410641			2.9124	0.07235
	2.6236	0.55196							2.9141	0.10145			1.084	0.470367			1.084	0.410639			2.9141	0.0722
	2.6249	0.5513							2.9157	0.10191			1.085	0.470457			1.085	0.410652			2.9157	0.0721
	2.6262	0.55047							2.9174	0.10237			1.086	0.470545			1.086	0.410664			2.9174	0.07208
	2.6275	0.55112							2.919	0.10277			1.087	0.47062			1.087	0.410671			2.919	0.07219
	2.6289	0.54867							2.9206	0.10304			1.088	0.470694			1.088	0.410678			2.9206	0.0723
	2.6302	0.54733							2.9223	0.10342			1.089	0.470775			1.089	0.410683			2.9223	0.07251
	2.6315	0.54874							2.9239	0.10386			1.09	0.470855			1.09	0.410687			2.9239	0.07268
	2.6329	0.54624							2.9256	0.10438			1.091	0.47093			1.091	0.410702			2.9256	0.0728
	2.6342	0.54386							2.9272	0.10497			1.092	0.471003			1.092	0.410718			2.9272	0.07303
	2.6356	0.54333							2.9289	0.10537			1.093	0.47106			1.093	0.410713			2.9289	0.07338
	2.6369	0.54094							2.9305	0.10587			1.094	0.471109			1.094	0.4107			2.9305	0.07394
	2.6382	0.54011							2.9322	0.10628			1.095	0.471181			1.095	0.410687			2.9322	0.07434
	2.6396	0.53817							2.9339	0.1068			1.096	0.471267			1.096	0.410672			2.9339	0.07468
	2.6409	0.53687							2.9355	0.10743			1.097	0.471356			1.097	0.410652			2.9355	0.07503
	2.6423	0.53562							2.9372	0.10792			1.098	0.471443			1.098	0.410619			2.9372	0.07543
	2.6436	0.53421							2.9389	0.10833			1.099	0.471525			1.099	0.410601			2.9389	0.07611
	2.645	0.53195							2.9405	0.10874			1.1	0.471584			1.1	0.410608			2.9405	0.07674
	2.6463	0.53137							2.9422	0.10917			1.101	0.47166			1.101	0.410621			2.9422	0.07733
	2.6477	0.52976							2.9439	0.1096			1.102	0.471753			1.102	0.410602			2.9439	0.07787
	2.649	0.52733							2.9455	0.11005			1.103	0.471851			1.103	0.410589			2.9455	0.0784
	2.6504	0.52513							2.9472	0.11055			1.104	0.471925			1.104	0.410603			2.9472	0.07884
	2.6517	0.52329							2.9489	0.111			1.105	0.472004			1.105	0.410621			2.9489	0.07921
	2.6531	0.5214							2.9506	0.11149			1.106	0.472057			1.106	0.410652			2.9506	0.07989
	2.6544	0.51963							2.9522	0.11232			1.107	0.472108			1.107	0.410687			2.9522	0.08059
	2.6558	0.51716							2.9539	0.11286			1.108	0.472187			1.108	0.410707			2.9539	0.08123
	2.6572	0.51618							2.9556	0.1133			1.109	0.472268			1.109	0.410713			2.9556	0.0818
	2.6585	0.51364							2.9573	0.11397			1.11	0.472349			1.11	0.410744			2.9573	0.08247
	2.6599	0.51307							2.959	0.11446			1.111	0.472436			1.111	0.410795			2.959	0.08327
	2.6613	0.51126							2.9607	0.11488			1.112	0.472506			1.112	0.41083			2.9607	0.08401
	2.6626	0.50883							2.9624	0.11529			1.113	0.47256			1.113	0.410851			2.9624	0.08463
	2.664	0.50629							2.9641	0.1158			1.114	0.472608			1.114	0.410861			2.9641	0.08517
	2.6654	0.50586							2.9658	0.11648			1.115	0.472641			1.115	0.410853			2.9658	0.08585
	2.6667	0.50477							2.9674	0.117			1.116	0.472678			1.116	0.410848			2.9674	0.08665
	2.6681	0.50205							2.9691	0.11747			1.117	0.472728			1.117	0.410852			2.9691	0.0875
	2.6695	0.49786							2.9709	0.11802			1.118	0.472783			1.118	0.410859			2.9709	0.08821
	2.6709	0.49659							2.9726	0.11868			1.119	0.472831			1.119	0.410856			2.9726	0.08891
	2.6722	0.49545							2.9743	0.11939			1.12	0.472878			1.12	0.410853			2.9743	0.08971
	2.6736	0.48993							2.976	0.12			1.121	0.472949			1.121	0.410858			2.976	0.0905
	2.675	0.48777							2.9777	0.12036			1.122	0.473025			1.122	0.410869			2.9777	0.09145
	2.6764	0.48591							2.9794	0.12072			1.123	0.473114			1.123	0.41089			2.9794	0.09219
	2.6778	0.48461							2.9811	0.12128			1.124	0.473205			1.124	0.410908			2.9811	0.0928
	2.6791	0.48063							2.9828	0.12181			1.125	0.473283			1.125	0.410931			2.9828	0.09354
	2.6805	0.47672							2.9845	0.12237			1.126	0.473355			1.126	0.410967			2.9845	0.09453
	2.6819	0.47256							2.9863	0.12296			1.127	0.473426			1.127	0.411022			2.9863	0.09564
	2.6833	0.46858							2.988	0.12361			1.128	0.473494			1.128	0.411079			2.988	0.0966
	2.6847	0.46558							2.9897	0.12422			1.129	0.473543			1.129	0.411121			2.9897	0.09758
	2.6861	0.46092							2.9914	0.12475			1.13	0.473559			1.13	0.411152			2.9914	0.09875
	2.6875	0.45694							2.9931	0.12524			1.131	0.473584			1.131	0.411183			2.9931	0.0998
	2.6889	0.45231							2.9949	0.12573			1.132	0.473627			1.132	0.411192			2.9949	0.10078
	2.6903	0.44729							2.9966	0.12625			1.133	0.473675			1.133	0.411207			2.9966	0.10191
	2.6917	0.44214							2.9983	0.1268			1.134	0.47373			1.134	0.411259			2.9983	0.10305
	2.6931	0.43742							3.0001	0.12735			1.135	0.473776			1.135	0.411304			3.0001	0.10427
	2.6945	0.43306							3.0018	0.12798			1.136	0.473806			1.136	0.411332			3.0018	0.10546
	2.6959	0.42673							3.0036	0.12851			1.137	0.473837			1.137	0.411361			3.0036	0.10668
	2.6973	0.41926							3.0053	0.1291			1.138	0.473937			1.138	0.411407			3.0053	0.10793
	2.6987	0.41191							3.007	0.12974			1.139	0.474041			1.139	0.411445			3.007	0.10927
	2.7001	0.40376							3.0088	0.13036			1.14	0.474121			1.14	0.411482			3.0088	0.11054
	2.7015	0.39676							3.0105	0.13089			1.141	0.474197			1.141	0.411524			3.0105	0.11172
	2.7029	0.39049							3.0123	0.13123			1.142	0.474241			1.142	0.411557			3.0123	0.11312
	2.7043	0.38443							3.014	0.13171			1.143	0.474268			1.143	0.411597			3.014	0.11451
	2.7057	0.37864							3.0158	0.13238			1.144	0.47433			1.144	0.411659			3.0158	0.11581
	2.7071	0.37334							3.0175	0.133			1.145	0.474424			1.145	0.41173			3.0175	0.11718
	2.7085	0.3678							3.0193	0.13343			1.146	0.474508			1.146	0.411793			3.0193	0.11848
	2.71	0.36396							3.0211	0.1339			1.147	0.47459			1.147	0.411865			3.0211	0.11978
	2.7114	0.3601							3.0228	0.13437			1.148	0.474664			1.148	0.411939			3.0228	0.12117
	2.7128	0.35627							3.0246	0.13479			1.149	0.474729			1.149	0.411996			3.0246	0.12248
	2.7142	0.35143							3.0263	0.13536			1.15	0.4748			1.15	0.412051			3.0263	0.12363
	2.7156	0.34847							3.0281	0.13597			1.151	0.474889			1.151	0.412123			3.0281	0.12506
	2.7171	0.34635							3.0299	0.13654			1.152	0.474975			1.152	0.412196			3.0299	0.12664
	2.7185	0.34509							3.0317	0.13709			1.153	0.475075			1.153	0.412267			3.0317	0.1281
	2.7199	0.3432							3.0334	0.1376			1.154	0.475177			1.154	0.412338			3.0334	0.12933
	2.7213	0.34281							3.0352	0.13795			1.155	0.475279			1.155	0.412412			3.0352	0.13061
	2.7228	0.34037							3.037	0.13841			1.156	0.475377			1.156	0.412487			3.037	0.13207
	2.7242	0.33631							3.0388	0.13898			1.157	0.475491			1.157	0.412589			3.0388	0.13336
	2.7256	0.33408							3.0405	0.13944			1.158	0.475606			1.158	0.412704			3.0405	0.13484
	2.7271	0.32979							3.0423	0.13993			1.159	0.475703			1.159	0.41279			3.0423	0.13629
	2.7285	0.32446							3.0441	0.14047			1.16	0.475798			1.16	0.412855			3.0441	0.13764
	2.7299	0.31981							3.0459	0.141			1.161	0.475906			1.161	0.412923			3.0459	0.13903
	2.7314	0.3152							3.0477	0.14148			1.162	0.476018			1.162	0.412995			3.0477	0.14041
	2.7328	0.31039							3.0495	0.14202			1.163	0.476126			1.163	0.413083			3.0495	0.14179
	2.7342	0.30536							3.0513	0.14253			1.164	0.476228			1.164	0.413194			3.0513	0.14323
	2.7357	0.30081							3.0531	0.14297			1.165	0.476337			1.165	0.413295			3.0531	0.1447
	2.7371	0.29504							3.0549	0.14351			1.166	0.476468			1.166	0.413382			3.0549	0.14628
	2.7386	0.28871							3.0567	0.14383			1.167	0.476594			1.167	0.413464			3.0567	0.14763
	2.74	0.28367							3.0585	0.14422			1.168	0.476707			1.168	0.413531			3.0585	0.14888
	2.7415	0.2787							3.0603	0.14473			1.169	0.476819			1.169	0.413596			3.0603	0.1505
	2.7429	0.27257							3.0621	0.1453			1.17	0.476921			1.17	0.413686			3.0621	0.1521
	2.7444	0.26534							3.0639	0.14594			1.171	0.47702			1.171	0.413783			3.0639	0.15374
	2.7458	0.25842							3.0657	0.14647			1.172	0.477144			1.172	0.413878			3.0657	0.15536
	2.7473	0.25213							3.0675	0.14682			1.173	0.47728			1.173	0.413973			3.0675	0.15681
	2.7487	0.24635							3.0694	0.14717			1.174	0.477436			1.174	0.4141			3.0694	0.15826
	2.7502	0.24172							3.0712	0.14762			1.175	0.477589			1.175	0.41423			3.0712	0.15993
	2.7517	0.23622							3.073	0.14797			1.176	0.477737			1.176	0.414362			3.073	0.1617
	2.7531	0.23159							3.0748	0.14848			1.177	0.477889			1.177	0.414499			3.0748	0.16327
	2.7546	0.22772							3.0766	0.14901			1.178	0.478054			1.178	0.414635			3.0766	0.16484
	2.7561	0.2251							3.0785	0.14933			1.179	0.478232			1.179	0.414758			3.0785	0.16653
	2.7575	0.22209							3.0803	0.14954			1.18	0.4784			1.18	0.414872			3.0803	0.16813
	2.759	0.21805							3.0821	0.15004			1.181	0.47856			1.181	0.415			3.0821	0.16971
	2.7605	0.21487							3.084	0.15047			1.182	0.478716			1.182	0.415127			3.084	0.17143
	2.7619	0.21199							3.0858	0.15077			1.183	0.478853			1.183	0.415237			3.0858	0.17319
	2.7634	0.20929							3.0876	0.15113			1.184	0.478987			1.184	0.41534			3.0876	0.17473
	2.7649	0.20696							3.0895	0.15157			1.185	0.479129			1.185	0.415439			3.0895	0.17631
	2.7663	0.20429							3.0913	0.15201			1.186	0.479272			1.186	0.415542			3.0913	0.17792
	2.7678	0.20187							3.0932	0.15217			1.187	0.479408			1.187	0.415655			3.0932	0.17948
	2.7693	0.1991							3.095	0.15257			1.188	0.479539			1.188	0.41577			3.095	0.18123
	2.7708	0.19678							3.0969	0.15302			1.189	0.479657			1.189	0.415896			3.0969	0.18295
	2.7723	0.19425							3.0987	0.15332			1.19	0.479777			1.19	0.416026			3.0987	0.18462
	2.7737	0.19103							3.1006	0.1538			1.191	0.479914			1.191	0.416158			3.1006	0.18621
	2.7752	0.18829							3.1024	0.15428			1.192	0.480044			1.192	0.416293			3.1024	0.18786
	2.7767	0.18576							3.1043	0.15473			1.193	0.480165			1.193	0.416429			3.1043	0.1896
	2.7782	0.18298							3.1061	0.15515			1.194	0.480289			1.194	0.416558			3.1061	0.19116
	2.7797	0.18009							3.108	0.15548			1.195	0.480419			1.195	0.416682			3.108	0.19276
	2.7812	0.17753							3.1099	0.15585			1.196	0.480546			1.196	0.416803			3.1099	0.19442
	2.7827	0.17511							3.1117	0.15628			1.197	0.480666			1.197	0.416925			3.1117	0.19592
	2.7842	0.17202							3.1136	0.1567			1.198	0.480807			1.198	0.417058			3.1136	0.1974
	2.7857	0.16897							3.1155	0.15709			1.199	0.48096			1.199	0.417199			3.1155	0.19889
	2.7872	0.1668							3.1173	0.1575			1.2	0.481119			1.2	0.417341			3.1173	0.2004
	2.7887	0.16479							3.1192	0.15793			1.201	0.481269			1.201	0.417472			3.1192	0.20194
	2.7902	0.16164							3.1211	0.1583			1.202	0.481411			1.202	0.417611			3.1211	0.20345
	2.7917	0.15904							3.123	0.1586			1.203	0.481548			1.203	0.417746			3.123	0.20498
	2.7932	0.15668							3.1249	0.15903			1.204	0.481687			1.204	0.417862			3.1249	0.20654
	2.7947	0.15441							3.1267	0.15953			1.205	0.481828			1.205	0.417976			3.1267	0.20803
	2.7962	0.15218							3.1286	0.15991			1.206	0.481982			1.206	0.418115			3.1286	0.20943
	2.7977	0.14997							3.1305	0.16037			1.207	0.482138			1.207	0.41826			3.1305	0.21087
	2.7992	0.14743							3.1324	0.16077			1.208	0.482279			1.208	0.418406			3.1324	0.21223
	2.8007	0.14484							3.1343	0.16106			1.209	0.482406			1.209	0.418541			3.1343	0.21361
	2.8022	0.14227							3.1362	0.16144			1.21	0.482558			1.21	0.418679			3.1362	0.21513
	2.8038	0.13983							3.1381	0.16192			1.211	0.482729			1.211	0.418832			3.1381	0.21659
	2.8053	0.13732							3.14	0.16244			1.212	0.48288			1.212	0.418979			3.14	0.21798
	2.8068	0.13466							3.1419	0.16294			1.213	0.483029			1.213	0.419112			3.1419	0.21944
	2.8083	0.13162							3.1438	0.16342			1.214	0.483199			1.214	0.419248			3.1438	0.22084
	2.8098	0.12918							3.1457	0.16396			1.215	0.48337			1.215	0.419393			3.1457	0.22222
	2.8114	0.12686							3.1476	0.16444			1.216	0.483531			1.216	0.419533			3.1476	0.22366
	2.8129	0.12444							3.1495	0.16492			1.217	0.483668			1.217	0.419661			3.1495	0.2251
	2.8144	0.12211							3.1514	0.16533			1.218	0.483819			1.218	0.419802			3.1514	0.22659
	2.8159	0.12052							3.1534	0.1658			1.219	0.483983			1.219	0.419942			3.1534	0.2281
	2.8175	0.11871							3.1553	0.1663			1.22	0.484147			1.22	0.420076			3.1553	0.22951
	2.819	0.11724							3.1572	0.16678			1.221	0.484332			1.221	0.420215			3.1572	0.23089
	2.8205	0.11658							3.1591	0.16742			1.222	0.484519			1.222	0.420355			3.1591	0.23232
	2.8221	0.11581							3.1611	0.16793			1.223	0.484718			1.223	0.420511			3.1611	0.23383
	2.8236	0.11518							3.163	0.16832			1.224	0.484919			1.224	0.420669			3.163	0.23538
	2.8251	0.1146							3.1649	0.16872			1.225	0.485105			1.225	0.420821			3.1649	0.23689
	2.8267	0.1141							3.1669	0.16914			1.226	0.48527			1.226	0.420967			3.1669	0.23835
	2.8282	0.11369							3.1688	0.16955			1.227	0.48543			1.227	0.421115			3.1688	0.23988
	2.8298	0.11296							3.1707	0.17001			1.228	0.485598			1.228	0.421256			3.1707	0.24123
	2.8313	0.11205							3.1727	0.17039			1.229	0.485763			1.229	0.421408			3.1727	0.24252
	2.8329	0.11162							3.1746	0.1708			1.23	0.485912			1.23	0.421576			3.1746	0.244
	2.8344	0.1114							3.1766	0.17127			1.231	0.486053			1.231	0.421747			3.1766	0.24554
	2.836	0.11023							3.1785	0.17169			1.232	0.486199			1.232	0.421922			3.1785	0.24703
	2.8375	0.10886							3.1805	0.17216			1.233	0.486364			1.233	0.422092			3.1805	0.24844
	2.8391	0.10748							3.1824	0.17249			1.234	0.486543			1.234	0.422261			3.1824	0.24984
	2.8406	0.10627							3.1844	0.17289			1.235	0.486724			1.235	0.422436			3.1844	0.25117
	2.8422	0.10563							3.1863	0.17332			1.236	0.486905			1.236	0.422612			3.1863	0.25257
	2.8437	0.10511							3.1883	0.17374			1.237	0.487074			1.237	0.422779			3.1883	0.25409
	2.8453	0.1041							3.1902	0.17427			1.238	0.487247			1.238	0.422938			3.1902	0.25551
	2.8469	0.10335							3.1922	0.17465			1.239	0.487414			1.239	0.423094			3.1922	0.25697
	2.8484	0.10226							3.1942	0.17498			1.24	0.487559			1.24	0.42324			3.1942	0.25829
	2.85	0.10069							3.1961	0.17546			1.241	0.48771			1.241	0.423393			3.1961	0.25945
	2.8516	0.09982							3.1981	0.17592			1.242	0.487871			1.242	0.423562			3.1981	0.26072
	2.8531	0.09895							3.2001	0.17618			1.243	0.48803			1.243	0.423738			3.2001	0.26217
	2.8547	0.09788							3.2021	0.17648			1.244	0.488204			1.244	0.423924			3.2021	0.2635
	2.8563	0.09646							3.204	0.17672			1.245	0.488377			1.245	0.424097			3.204	0.26476
	2.8578	0.09533							3.206	0.17691			1.246	0.488524			1.246	0.424229			3.206	0.26581
	2.8594	0.09446							3.208	0.17727			1.247	0.488676			1.247	0.424363			3.208	0.267
	2.861	0.09347							3.21	0.1776			1.248	0.488828			1.248	0.424511			3.21	0.26826
	2.8626	0.09242							3.212	0.17783			1.249	0.488978			1.249	0.424667			3.212	0.26944
	2.8642	0.09134							3.214	0.17818			1.25	0.489128			1.25	0.424842			3.214	0.27074
	2.8657	0.09035							3.216	0.17837			1.251	0.489233			1.251	0.424979			3.216	0.27192
	2.8673	0.08972							3.218	0.17832			1.252	0.489364			1.252	0.425115			3.218	0.27292
	2.8689	0.08842							3.22	0.17846			1.253	0.48949			1.253	0.425249			3.22	0.27405
	2.8705	0.08685							3.222	0.17876			1.254	0.489609			1.254	0.425383			3.222	0.27538
	2.8721	0.08602							3.224	0.17883			1.255	0.489745			1.255	0.425511			3.224	0.27643
	2.8737	0.08503							3.226	0.17894			1.256	0.489874			1.256	0.425635			3.226	0.27734
	2.8753	0.08381							3.228	0.17906			1.257	0.489984			1.257	0.425749			3.228	0.27829
	2.8769	0.08308							3.23	0.17921			1.258	0.490107			1.258	0.425862			3.23	0.27932
	2.8785	0.08218							3.232	0.17944			1.259	0.490241			1.259	0.425967			3.232	0.28023
	2.8801	0.08096							3.234	0.17955			1.26	0.490382			1.26	0.426075			3.234	0.28113
	2.8817	0.08009							3.236	0.17958			1.261	0.490536			1.261	0.426193			3.236	0.28213
	2.8833	0.07925							3.2381	0.17985			1.262	0.490674			1.262	0.426307			3.2381	0.28301
	2.8849	0.07808							3.2401	0.18031			1.263	0.490787			1.263	0.426412			3.2401	0.28379
	2.8865	0.07704							3.2421	0.18054			1.264	0.490893			1.264	0.426513			3.2421	0.28453
	2.8881	0.07632							3.2441	0.18059			1.265	0.491003			1.265	0.426637			3.2441	0.28521
	2.8897	0.07543							3.2462	0.1808			1.266	0.491103			1.266	0.426773			3.2462	0.28602
	2.8913	0.07459							3.2482	0.18112			1.267	0.491206			1.267	0.426903			3.2482	0.28669
	2.8929	0.07397							3.2502	0.18144			1.268	0.49132			1.268	0.427031			3.2502	0.28738
	2.8945	0.07276							3.2523	0.18179			1.269	0.491448			1.269	0.427158			3.2523	0.28831
	2.8962	0.072							3.2543	0.18221			1.27	0.491576			1.27	0.427278			3.2543	0.28914
	2.8978	0.07154							3.2564	0.1825			1.271	0.491686			1.271	0.427383			3.2564	0.28973
	2.8994	0.07053							3.2584	0.18282			1.272	0.491792			1.272	0.427485			3.2584	0.29037
	2.901	0.06972							3.2605	0.18305			1.273	0.491907			1.273	0.427594			3.2605	0.29095
	2.9027	0.06894							3.2625	0.18331			1.274	0.492036			1.274	0.427724			3.2625	0.29167
	2.9043	0.06779							3.2646	0.18361			1.275	0.492158			1.275	0.42786			3.2646	0.29225
	2.9059	0.06684							3.2666	0.18384			1.276	0.492279			1.276	0.427998			3.2666	0.29281
	2.9075	0.06603							3.2687	0.18424			1.277	0.4924			1.277	0.428138			3.2687	0.29357
	2.9092	0.06516							3.2707	0.18457			1.278	0.492518			1.278	0.428283			3.2707	0.29422
	2.9108	0.06438							3.2728	0.18484			1.279	0.492636			1.279	0.428425			3.2728	0.29478
	2.9124	0.06362							3.2749	0.18524			1.28	0.492761			1.28	0.428574			3.2749	0.29547
	2.9141	0.06298							3.277	0.1856			1.281	0.492883			1.281	0.428727			3.277	0.29609
	2.9157	0.06248							3.279	0.18584			1.282	0.49301			1.282	0.428874			3.279	0.29673
	2.9174	0.0618							3.2811	0.1861			1.283	0.493147			1.283	0.429009			3.2811	0.29744
	2.919	0.06116							3.2832	0.18644			1.284	0.493284			1.284	0.429132			3.2832	0.29827
	2.9206	0.06025							3.2853	0.18681			1.285	0.493413			1.285	0.429257			3.2853	0.29903
	2.9223	0.05935							3.2873	0.18702			1.286	0.493534			1.286	0.429385			3.2873	0.29972
	2.9239	0.05871							3.2894	0.18732			1.287	0.493664			1.287	0.429515			3.2894	0.30045
	2.9256	0.05817							3.2915	0.18774			1.288	0.493798			1.288	0.429644			3.2915	0.30139
	2.9272	0.0576							3.2936	0.18823			1.289	0.493935			1.289	0.429777			3.2936	0.30238
	2.9289	0.05671							3.2957	0.18854			1.29	0.494079			1.29	0.429914			3.2957	0.30323
	2.9305	0.05611							3.2978	0.1888			1.291	0.494227			1.291	0.430063			3.2978	0.30407
	2.9322	0.05587							3.2999	0.18922			1.292	0.494379			1.292	0.430214			3.2999	0.30487
	2.9339	0.05537							3.302	0.18959			1.293	0.494512			1.293	0.430349			3.302	0.30566
	2.9355	0.05481							3.3041	0.19009			1.294	0.494638			1.294	0.430482			3.3041	0.30657
	2.9372	0.05422							3.3062	0.19059			1.295	0.494779			1.295	0.430627			3.3062	0.30743
	2.9389	0.05342							3.3083	0.19095			1.296	0.494918			1.296	0.430774			3.3083	0.30801
	2.9405	0.05273							3.3104	0.19125			1.297	0.495077			1.297	0.43093			3.3104	0.30868
	2.9422	0.0523							3.3125	0.1916			1.298	0.495244			1.298	0.431087			3.3125	0.30926
	2.9439	0.05184							3.3147	0.19205			1.299	0.495403			1.299	0.431252			3.3147	0.30991
	2.9455	0.05127							3.3168	0.19245			1.3	0.495536			1.3	0.431407			3.3168	0.31043
	2.9472	0.05073							3.3189	0.1928			1.301	0.495702			1.301	0.431601			3.3189	0.31089
	2.9489	0.05033							3.321	0.19323			1.302	0.495863			1.302	0.431791			3.321	0.31154
	2.9506	0.05002							3.3232	0.19369			1.303	0.496024			1.303	0.431976			3.3232	0.31216
	2.9522	0.04978							3.3253	0.19425			1.304	0.496196			1.304	0.432165			3.3253	0.31284
	2.9539	0.0494							3.3274	0.19455			1.305	0.496381			1.305	0.432362			3.3274	0.31342
	2.9556	0.04921							3.3296	0.19492			1.306	0.496564			1.306	0.43255			3.3296	0.31398
	2.9573	0.04883							3.3317	0.19529			1.307	0.496748			1.307	0.432731			3.3317	0.31454
	2.959	0.04838							3.3338	0.19559			1.308	0.49693			1.308	0.432912			3.3338	0.31512
	2.9607	0.0479							3.336	0.19589			1.309	0.497102			1.309	0.433101			3.336	0.31574
	2.9624	0.04765							3.3381	0.19629			1.31	0.497272			1.31	0.433292			3.3381	0.31627
	2.9641	0.04751							3.3403	0.19675			1.311	0.497455			1.311	0.433493			3.3403	0.31688
	2.9658	0.04743							3.3424	0.19696			1.312	0.497628			1.312	0.433686			3.3424	0.3174
	2.9674	0.04734							3.3446	0.19727			1.313	0.497789			1.313	0.433848			3.3446	0.31806
	2.9691	0.04707							3.3468	0.1976			1.314	0.497957			1.314	0.434009			3.3468	0.31894
	2.9709	0.04714							3.3489	0.19776			1.315	0.498094			1.315	0.434186			3.3489	0.31979
	2.9726	0.04709							3.3511	0.19811			1.316	0.498233			1.316	0.434359			3.3511	0.32058
	2.9743	0.04694							3.3533	0.19854			1.317	0.498391			1.317	0.434533			3.3533	0.32121
	2.976	0.0467							3.3554	0.19885			1.318	0.498554			1.318	0.434706			3.3554	0.32189
	2.9777	0.04646							3.3576	0.19919			1.319	0.498721			1.319	0.43489			3.3576	0.32257
	2.9794	0.04681							3.3598	0.19952			1.32	0.498886			1.32	0.435095			3.3598	0.32322
	2.9811	0.04708							3.362	0.19984			1.321	0.499061			1.321	0.435292			3.362	0.32394
	2.9828	0.04718							3.3641	0.20009			1.322	0.499233			1.322	0.435479			3.3641	0.32456
	2.9845	0.04748							3.3663	0.20035			1.323	0.499396			1.323	0.435651			3.3663	0.32527
	2.9863	0.04748							3.3685	0.20064			1.324	0.499553			1.324	0.435803			3.3685	0.32605
	2.988	0.04755							3.3707	0.20092			1.325	0.499718			1.325	0.435963			3.3707	0.32662
	2.9897	0.04777							3.3729	0.20123			1.326	0.499895			1.326	0.436134			3.3729	0.32721
	2.9914	0.04803							3.3751	0.20162			1.327	0.500083			1.327	0.436313			3.3751	0.32784
	2.9931	0.04814							3.3773	0.20193			1.328	0.500264			1.328	0.436495			3.3773	0.32839
	2.9949	0.04814							3.3795	0.20219			1.329	0.500434			1.329	0.43668			3.3795	0.329
	2.9966	0.04852							3.3817	0.20247			1.33	0.500596			1.33	0.436863			3.3817	0.32978
	2.9983	0.049							3.3839	0.20286			1.331	0.500747			1.331	0.437036			3.3839	0.33034
	3.0001	0.04914							3.3861	0.2031			1.332	0.500891			1.332	0.437203			3.3861	0.33096
	3.0018	0.04944							3.3883	0.20329			1.333	0.501047			1.333	0.43737			3.3883	0.33164
	3.0036	0.04997							3.3905	0.20362			1.334	0.501211			1.334	0.437528			3.3905	0.33237
	3.0053	0.05033							3.3928	0.20393			1.335	0.501375			1.335	0.437686			3.3928	0.33296
	3.007	0.05041							3.395	0.20415			1.336	0.501518			1.336	0.437852			3.395	0.33355
	3.0088	0.05048							3.3972	0.20437			1.337	0.501657			1.337	0.438023			3.3972	0.33413
	3.0105	0.0509							3.3994	0.20457			1.338	0.501802			1.338	0.438201			3.3994	0.33472
	3.0123	0.05126							3.4017	0.20483			1.339	0.501944			1.339	0.438377			3.4017	0.33528
	3.014	0.05142							3.4039	0.20509			1.34	0.50209			1.34	0.438545			3.4039	0.33575
	3.0158	0.05156							3.4061	0.20529			1.341	0.502225			1.341	0.438713			3.4061	0.33618
	3.0175	0.05173							3.4084	0.20558			1.342	0.502357			1.342	0.438875			3.4084	0.33657
	3.0193	0.05207							3.4106	0.20592			1.343	0.502512			1.343	0.439024			3.4106	0.33715
	3.0211	0.05257							3.4129	0.20622			1.344	0.502667			1.344	0.439166			3.4129	0.33756
	3.0228	0.05289							3.4151	0.20659			1.345	0.502809			1.345	0.43932			3.4151	0.33802
	3.0246	0.0529							3.4174	0.20706			1.346	0.502942			1.346	0.439474			3.4174	0.33866
	3.0263	0.05297							3.4196	0.2075			1.347	0.503069			1.347	0.439638			3.4196	0.3394
	3.0281	0.05328							3.4219	0.20805			1.348	0.503216			1.348	0.439829			3.4219	0.34019
	3.0299	0.05361							3.4241	0.20863			1.349	0.503383			1.349	0.440014			3.4241	0.34102
	3.0317	0.05392							3.4264	0.20904			1.35	0.503563			1.35	0.440193			3.4264	0.34178
	3.0334	0.05401							3.4287	0.20932			1.351	0.503737			1.351	0.44038			3.4287	0.34244
	3.0352	0.05408							3.4309	0.20972			1.352	0.503899			1.352	0.440565			3.4309	0.34329
	3.037	0.0545							3.4332	0.21002			1.353	0.504055			1.353	0.440744			3.4332	0.34402
	3.0388	0.05491							3.4355	0.21046			1.354	0.504206			1.354	0.440925			3.4355	0.34467
	3.0405	0.05515							3.4378	0.211			1.355	0.504356			1.355	0.44111			3.4378	0.3454
	3.0423	0.05509							3.44	0.21132			1.356	0.504509			1.356	0.441288			3.44	0.34602
	3.0441	0.0549							3.4423	0.21159			1.357	0.50466			1.357	0.44146			3.4423	0.34664
	3.0459	0.05496							3.4446	0.21191			1.358	0.504816			1.358	0.441639			3.4446	0.34738
	3.0477	0.05518							3.4469	0.2123			1.359	0.504973			1.359	0.441815			3.4469	0.34797
	3.0495	0.05528							3.4492	0.21274			1.36	0.505133			1.36	0.441992			3.4492	0.3485
	3.0513	0.05535							3.4515	0.2131			1.361	0.505316			1.361	0.442198			3.4515	0.34911
	3.0531	0.05539							3.4538	0.21336			1.362	0.505511			1.362	0.442398			3.4538	0.34967
	3.0549	0.05532							3.4561	0.21357			1.363	0.505714			1.363	0.442576			3.4561	0.35024
	3.0567	0.05555							3.4584	0.21399			1.364	0.50591			1.364	0.442754			3.4584	0.35076
	3.0585	0.05558							3.4607	0.21434			1.365	0.506084			1.365	0.442934			3.4607	0.35121
	3.0603	0.05564							3.463	0.21468			1.366	0.506271			1.366	0.443126			3.463	0.35175
	3.0621	0.05563							3.4653	0.21508			1.367	0.506446			1.367	0.443305			3.4653	0.35235
	3.0639	0.05548							3.4676	0.21537			1.368	0.506606			1.368	0.443491			3.4676	0.35283
	3.0657	0.05536							3.47	0.21563			1.369	0.506754			1.369	0.443677			3.47	0.35326
	3.0675	0.05554							3.4723	0.21581			1.37	0.506892			1.37	0.443867			3.4723	0.35369
	3.0694	0.05583							3.4746	0.21599			1.371	0.507024			1.371	0.444055			3.4746	0.35408
	3.0712	0.05563							3.477	0.21628			1.372	0.507155			1.372	0.444234			3.477	0.3545
	3.073	0.05537							3.4793	0.21648			1.373	0.507263			1.373	0.444383			3.4793	0.3548
	3.0748	0.05543							3.4816	0.2166			1.374	0.507359			1.374	0.444527			3.4816	0.35509
	3.0766	0.05548							3.484	0.21695			1.375	0.507432			1.375	0.444667			3.484	0.35553
	3.0785	0.05556							3.4863	0.21727			1.376	0.50747			1.376	0.444786			3.4863	0.35609
	3.0803	0.05566							3.4887	0.21754			1.377	0.507454			1.377	0.444868			3.4887	0.35664
	3.0821	0.05568							3.491	0.21793			1.378	0.507368			1.378	0.444913			3.491	0.35711
	3.084	0.0557							3.4934	0.21827			1.379	0.507241			1.379	0.444953			3.4934	0.35755
	3.0858	0.05578							3.4957	0.21852			1.38	0.507092			1.38	0.444986			3.4957	0.35808
	3.0876	0.05568							3.4981	0.21885			1.381	0.506948			1.381	0.445015			3.4981	0.35866
	3.0895	0.05568							3.5004	0.21932			1.382	0.506844			1.382	0.44508			3.5004	0.35933
	3.0913	0.05593							3.5028	0.21973			1.383	0.506775			1.383	0.445182			3.5028	0.36014
	3.0932	0.05593							3.5052	0.22022			1.384	0.506735			1.384	0.445307			3.5052	0.36087
	3.095	0.05593							3.5075	0.22075			1.385	0.506719			1.385	0.445446			3.5075	0.36161
	3.0969	0.0559							3.5099	0.22112			1.386	0.506694			1.386	0.445568			3.5099	0.36249
	3.0987	0.05588							3.5123	0.22145			1.387	0.506661			1.387	0.445673			3.5123	0.36325
	3.1006	0.05579							3.5147	0.22184			1.388	0.50655			1.388	0.445725			3.5147	0.36381
	3.1024	0.05594							3.5171	0.22207			1.389	0.506416			1.389	0.445763			3.5171	0.36443
	3.1043	0.05607							3.5194	0.22228			1.39	0.506311			1.39	0.445812			3.5194	0.36524
	3.1061	0.05621							3.5218	0.22266			1.391	0.506234			1.391	0.445873			3.5218	0.36584
	3.108	0.05645							3.5242	0.22299			1.392	0.506337			1.392	0.446016			3.5242	0.36651
	3.1099	0.05641							3.5266	0.22336			1.393	0.506593			1.393	0.446229			3.5266	0.36736
	3.1117	0.05627							3.529	0.22385			1.394	0.506965			1.394	0.446497			3.529	0.36819
	3.1136	0.05631							3.5314	0.22423			1.395	0.507446			1.395	0.446803			3.5314	0.36886
	3.1155	0.05653							3.5338	0.22465			1.396	0.507922			1.396	0.447102			3.5338	0.36954
	3.1173	0.05668							3.5362	0.22523			1.397	0.508356			1.397	0.447388			3.5362	0.37022
	3.1192	0.05688							3.5387	0.22588			1.398	0.508756			1.398	0.447669			3.5387	0.37088
	3.1211	0.05696							3.5411	0.2264			1.399	0.509102			1.399	0.447939			3.5411	0.37153
	3.123	0.05699							3.5435	0.22677			1.4	0.50943			1.4	0.448211			3.5435	0.37219
	3.1249	0.05713							3.5459	0.22719			1.401	0.509735			1.401	0.448476			3.5459	0.37281
	3.1267	0.05708							3.5483	0.22758			1.402	0.510032			1.402	0.448735			3.5483	0.3734
	3.1286	0.05718							3.5508	0.22795			1.403	0.510306			1.403	0.448972			3.5508	0.3739
	3.1305	0.0573							3.5532	0.22842			1.404	0.510574			1.404	0.449188			3.5532	0.37447
	3.1324	0.05755							3.5556	0.22888			1.405	0.510839			1.405	0.449383			3.5556	0.37514
	3.1343	0.05798							3.5581	0.22934			1.406	0.511094			1.406	0.449565			3.5581	0.37567
	3.1362	0.05848							3.5605	0.22971			1.407	0.511351			1.407	0.449742			3.5605	0.37615
	3.1381	0.0587							3.563	0.23012			1.408	0.511591			1.408	0.449917			3.563	0.3767
	3.14	0.05868							3.5654	0.23046			1.409	0.511796			1.409	0.450088			3.5654	0.37726
	3.1419	0.05873							3.5679	0.2308			1.41	0.511987			1.41	0.450264			3.5679	0.3776
	3.1438	0.05902							3.5703	0.23105			1.411	0.512165			1.411	0.450441			3.5703	0.37802
	3.1457	0.05941							3.5728	0.2313			1.412	0.512338			1.412	0.450621			3.5728	0.37846
	3.1476	0.05954							3.5753	0.23154			1.413	0.512513			1.413	0.450803			3.5753	0.37876
	3.1495	0.05959							3.5777	0.23167			1.414	0.512684			1.414	0.45099			3.5777	0.3791
	3.1514	0.05981							3.5802	0.23182			1.415	0.512856			1.415	0.451192			3.5802	0.37956
	3.1534	0.06016							3.5827	0.23208			1.416	0.513041			1.416	0.451406			3.5827	0.38007
	3.1553	0.06057							3.5852	0.23221			1.417	0.513229			1.417	0.451618			3.5852	0.38057
	3.1572	0.06085							3.5876	0.23228			1.418	0.513411			1.418	0.451815			3.5876	0.38103
	3.1591	0.06096							3.5901	0.23247			1.419	0.513593			1.419	0.452005			3.5901	0.38176
	3.1611	0.06118							3.5926	0.23274			1.42	0.513767			1.42	0.452187			3.5926	0.38242
	3.163	0.06134							3.5951	0.23298			1.421	0.513929			1.421	0.452359			3.5951	0.38302
	3.1649	0.06144							3.5976	0.2333			1.422	0.514086			1.422	0.452528			3.5976	0.38361
	3.1669	0.0616							3.6001	0.23363			1.423	0.514241			1.423	0.452701			3.6001	0.38415
	3.1688	0.06178							3.6026	0.23385			1.424	0.514403			1.424	0.45288			3.6026	0.38459
	3.1707	0.0621							3.6051	0.23406			1.425	0.514574			1.425	0.453065			3.6051	0.38515
	3.1727	0.06234							3.6076	0.23435			1.426	0.514745			1.426	0.453247			3.6076	0.38579
	3.1746	0.06232							3.6101	0.23471			1.427	0.514907			1.427	0.453415			3.6101	0.38636
	3.1766	0.06231							3.6126	0.23502			1.428	0.515062			1.428	0.453575			3.6126	0.38687
	3.1785	0.06239							3.6152	0.23534			1.429	0.515191			1.429	0.453725			3.6152	0.38736
	3.1805	0.06254							3.6177	0.23573			1.43	0.515319			1.43	0.453882			3.6177	0.38781
	3.1824	0.06287							3.6202	0.23605			1.431	0.515454			1.431	0.454035			3.6202	0.38818
	3.1844	0.06305							3.6227	0.23647			1.432	0.515572			1.432	0.454186			3.6227	0.3886
	3.1863	0.06314							3.6253	0.237			1.433	0.515695			1.433	0.454341			3.6253	0.38913
	3.1883	0.0632							3.6278	0.23756			1.434	0.51583			1.434	0.45449			3.6278	0.38959
	3.1902	0.0633							3.6303	0.23811			1.435	0.515976			1.435	0.45465			3.6303	0.38991
	3.1922	0.06348							3.6329	0.23874			1.436	0.51613			1.436	0.45483			3.6329	0.39032
	3.1942	0.06358							3.6354	0.23945			1.437	0.516283			1.437	0.455008			3.6354	0.3907
	3.1961	0.06374							3.638	0.2401			1.438	0.516427			1.438	0.455175			3.638	0.39111
	3.1981	0.06403							3.6405	0.24064			1.439	0.516562			1.439	0.455336			3.6405	0.39144
	3.2001	0.06448							3.6431	0.24112			1.44	0.516685			1.44	0.455486			3.6431	0.39187
	3.2021	0.06432							3.6457	0.24146			1.441	0.516804			1.441	0.455635			3.6457	0.39216
	3.204	0.06441							3.6482	0.24185			1.442	0.51691			1.442	0.455778			3.6482	0.3924
	3.206	0.06495							3.6508	0.24232			1.443	0.517013			1.443	0.455924			3.6508	0.39271
	3.208	0.06515							3.6534	0.24267			1.444	0.517126			1.444	0.456077			3.6534	0.39302
	3.21	0.0655							3.6559	0.24301			1.445	0.517245			1.445	0.456233			3.6559	0.39341
	3.212	0.06588							3.6585	0.24339			1.446	0.517371			1.446	0.4564			3.6585	0.39376
	3.214	0.06609							3.6611	0.24377			1.447	0.517507			1.447	0.456574			3.6611	0.39401
	3.216	0.06628							3.6637	0.24406			1.448	0.517632			1.448	0.456728			3.6637	0.39425
	3.218	0.06663							3.6663	0.24432			1.449	0.517748			1.449	0.456871			3.6663	0.39459
	3.22	0.06699							3.6689	0.24462			1.45	0.517853			1.45	0.457014			3.6689	0.39487
	3.222	0.06736							3.6715	0.24494			1.451	0.517915			1.451	0.457128			3.6715	0.39506
	3.224	0.06779							3.6741	0.24518			1.452	0.517973			1.452	0.457242			3.6741	0.39533
	3.226	0.06834							3.6767	0.24539			1.453	0.518027			1.453	0.457349			3.6767	0.39563
	3.228	0.06881							3.6793	0.24561			1.454	0.518082			1.454	0.457448			3.6793	0.39574
	3.23	0.06898							3.6819	0.24583			1.455	0.518128			1.455	0.45754			3.6819	0.39586
	3.232	0.06912							3.6845	0.24601			1.456	0.518183			1.456	0.457651			3.6845	0.39608
	3.234	0.06951							3.6872	0.24617			1.457	0.518251			1.457	0.457773			3.6872	0.39623
	3.236	0.07008							3.6898	0.24637			1.458	0.518311			1.458	0.457893			3.6898	0.39636
	3.2381	0.07037							3.6924	0.24653			1.459	0.518368			1.459	0.458015			3.6924	0.39668
	3.2401	0.07043							3.695	0.24668			1.46	0.518436			1.46	0.458137			3.695	0.39704
	3.2421	0.07061							3.6977	0.24685			1.461	0.51849			1.461	0.458247			3.6977	0.39732
	3.2441	0.07097							3.7003	0.24728			1.462	0.51853			1.462	0.458348			3.7003	0.39758
	3.2462	0.07107							3.703	0.24781			1.463	0.51858			1.463	0.458451			3.703	0.39779
	3.2482	0.071							3.7056	0.24834			1.464	0.518623			1.464	0.458541			3.7056	0.39797
	3.2502	0.07083							3.7083	0.24874			1.465	0.518649			1.465	0.458625			3.7083	0.39812
	3.2523	0.07039							3.7109	0.24904			1.466	0.518659			1.466	0.458709			3.7109	0.39832
	3.2543	0.06946							3.7136	0.2492			1.467	0.518663			1.467	0.458793			3.7136	0.39851
	3.2564	0.06814							3.7162	0.24936			1.468	0.518675			1.468	0.458882			3.7162	0.39864
	3.2584	0.06608							3.7189	0.24957			1.469	0.518698			1.469	0.458972			3.7189	0.39883
	3.2605	0.06336							3.7216	0.24972			1.47	0.518737			1.47	0.459069			3.7216	0.39906
	3.2625	0.0602							3.7242	0.24992			1.471	0.518787			1.471	0.459164			3.7242	0.39921
	3.2646	0.05707							3.7269	0.25013			1.472	0.518839			1.472	0.459245			3.7269	0.39953
	3.2666	0.05421							3.7296	0.25029			1.473	0.518895			1.473	0.459317			3.7296	0.39982
	3.2687	0.05174							3.7323	0.25065			1.474	0.518949			1.474	0.459388			3.7323	0.40001
	3.2707	0.05026							3.735	0.25126			1.475	0.518993			1.475	0.459453			3.735	0.40021
	3.2728	0.04936							3.7377	0.2518			1.476	0.519025			1.476	0.459514			3.7377	0.40044
	3.2749	0.04859							3.7404	0.25215			1.477	0.519043			1.477	0.459579			3.7404	0.40062
	3.277	0.04818							3.7431	0.25263			1.478	0.51906			1.478	0.459649			3.7431	0.40088
	3.279	0.04793							3.7458	0.25316			1.479	0.519084			1.479	0.45972			3.7458	0.4011
	3.2811	0.04788							3.7485	0.25374			1.48	0.519106			1.48	0.459782			3.7485	0.4013
	3.2832	0.04829							3.7512	0.25437			1.481	0.519135			1.481	0.459849			3.7512	0.40149
	3.2853	0.0491							3.7539	0.25496			1.482	0.519172			1.482	0.459918			3.7539	0.40178
	3.2873	0.04992							3.7566	0.25547			1.483	0.519228			1.483	0.459986			3.7566	0.40194
	3.2894	0.05056							3.7593	0.2559			1.484	0.519289			1.484	0.460055			3.7593	0.40201
	3.2915	0.05109							3.7621	0.25619			1.485	0.519346			1.485	0.460123			3.7621	0.4022
	3.2936	0.0516							3.7648	0.2566			1.486	0.519393			1.486	0.460185			3.7648	0.40244
	3.2957	0.05208							3.7675	0.25706			1.487	0.519439			1.487	0.460253			3.7675	0.40268
	3.2978	0.05275							3.7703	0.25746			1.488	0.519478			1.488	0.460318			3.7703	0.40282
	3.2999	0.05341							3.773	0.25788			1.489	0.519495			1.489	0.460371			3.773	0.40297
	3.302	0.05387							3.7758	0.25829			1.49	0.519506			1.49	0.46043			3.7758	0.40314
	3.3041	0.05423							3.7785	0.25862			1.491	0.519509			1.491	0.460496			3.7785	0.40324
	3.3062	0.05439							3.7813	0.25897			1.492	0.519503			1.492	0.460556			3.7813	0.40339
	3.3083	0.05429							3.784	0.25935			1.493	0.519476			1.493	0.460603			3.784	0.40352
	3.3104	0.0544							3.7868	0.25965			1.494	0.519453			1.494	0.46066			3.7868	0.40364
	3.3125	0.05468							3.7896	0.25995			1.495	0.519437			1.495	0.460716			3.7896	0.40381
	3.3147	0.05489							3.7923	0.26036			1.496	0.519425			1.496	0.460757			3.7923	0.40399
	3.3168	0.05497							3.7951	0.26072			1.497	0.519435			1.497	0.460803			3.7951	0.40416
	3.3189	0.05527							3.7979	0.2611			1.498	0.519449			1.498	0.460852			3.7979	0.40429
	3.321	0.05538							3.8007	0.26146			1.499	0.519459			1.499	0.460906			3.8007	0.40437
	3.3232	0.05557							3.8035	0.26181			1.5	0.519471			1.5	0.460969			3.8035	0.40446
	3.3253	0.05593							3.8063	0.26212			1.501	0.519464			1.501	0.461017			3.8063	0.40467
	3.3274	0.05642							3.8091	0.26249			1.502	0.519452			1.502	0.461053			3.8091	0.405
	3.3296	0.05669							3.8119	0.26283			1.503	0.519423			1.503	0.461063			3.8119	0.40515
	3.3317	0.057							3.8147	0.26323			1.504	0.519387			1.504	0.461072			3.8147	0.40535
	3.3338	0.05744							3.8175	0.26357			1.505	0.519354			1.505	0.461089			3.8175	0.40559
	3.336	0.05812							3.8203	0.26394			1.506	0.519325			1.506	0.461108			3.8203	0.40585
	3.3381	0.0586							3.8231	0.26441			1.507	0.519286			1.507	0.461118			3.8231	0.40602
	3.3403	0.059							3.8259	0.26475			1.508	0.519251			1.508	0.461127			3.8259	0.40623
	3.3424	0.05959							3.8288	0.26501			1.509	0.519221			1.509	0.46115			3.8288	0.40645
	3.3446	0.0602							3.8316	0.26535			1.51	0.519194			1.51	0.461186			3.8316	0.40671
	3.3468	0.06069							3.8344	0.2657			1.511	0.519162			1.511	0.461242			3.8344	0.40685
	3.3489	0.06106							3.8373	0.26607			1.512	0.519127			1.512	0.46132			3.8373	0.40713
	3.3511	0.0612							3.8401	0.26639			1.513	0.519085			1.513	0.461389			3.8401	0.40748
	3.3533	0.06137							3.8429	0.2667			1.514	0.519035			1.514	0.461462			3.8429	0.40776
	3.3554	0.06182							3.8458	0.26702			1.515	0.518982			1.515	0.46154			3.8458	0.4079
	3.3576	0.06196							3.8487	0.26738			1.516	0.518921			1.516	0.4616			3.8487	0.4081
	3.3598	0.06188							3.8515	0.26771			1.517	0.51886			1.517	0.461661			3.8515	0.40828
	3.362	0.06212							3.8544	0.2681			1.518	0.518799			1.518	0.461711			3.8544	0.40853
	3.3641	0.06233							3.8572	0.26845			1.519	0.518736			1.519	0.461738			3.8572	0.40872
	3.3663	0.06242							3.8601	0.26882			1.52	0.518678			1.52	0.461748			3.8601	0.40886
	3.3685	0.06237							3.863	0.26915			1.521	0.518638			1.521	0.461761			3.863	0.40898
	3.3707	0.0623							3.8659	0.26947			1.522	0.518612			1.522	0.46178			3.8659	0.40924
	3.3729	0.06249							3.8688	0.26973			1.523	0.518591			1.523	0.461803			3.8688	0.4094
	3.3751	0.06286							3.8716	0.27005			1.524	0.518581			1.524	0.461829			3.8716	0.40953
	3.3773	0.06301							3.8745	0.27036			1.525	0.51857			1.525	0.461859			3.8745	0.40972
	3.3795	0.06294							3.8774	0.27067			1.526	0.518551			1.526	0.46189			3.8774	0.40994
	3.3817	0.06271							3.8803	0.27102			1.527	0.518516			1.527	0.461909			3.8803	0.41009
	3.3839	0.06261							3.8832	0.27141			1.528	0.518462			1.528	0.461916			3.8832	0.41021
	3.3861	0.06247							3.8862	0.27176			1.529	0.518406			1.529	0.461919			3.8862	0.41029
	3.3883	0.06236							3.8891	0.27205			1.53	0.518339			1.53	0.461926			3.8891	0.41042
	3.3905	0.06205							3.892	0.27232			1.531	0.518273			1.531	0.461936			3.892	0.41049
	3.3928	0.06181							3.8949	0.27262			1.532	0.518215			1.532	0.461941			3.8949	0.41057
	3.395	0.06134							3.8978	0.2729			1.533	0.518151			1.533	0.461942			3.8978	0.41071
	3.3972	0.06072							3.9008	0.27314			1.534	0.518086			1.534	0.461938			3.9008	0.41076
	3.3994	0.05995							3.9037	0.27337			1.535	0.518031			1.535	0.46194			3.9037	0.41082
	3.4017	0.05887							3.9067	0.27377			1.536	0.517975			1.536	0.46194			3.9067	0.41101
	3.4039	0.05764							3.9096	0.27409			1.537	0.517925			1.537	0.461944			3.9096	0.41115
	3.4061	0.05634							3.9126	0.27434			1.538	0.517881			1.538	0.461959			3.9126	0.41118
	3.4084	0.05486							3.9155	0.27461			1.539	0.517832			1.539	0.461971			3.9155	0.41116
	3.4106	0.05334							3.9185	0.2749			1.54	0.517783			1.54	0.46197			3.9185	0.41112
	3.4129	0.05166							3.9214	0.27522			1.541	0.517742			1.541	0.461969			3.9214	0.41108
	3.4151	0.05017							3.9244	0.27545			1.542	0.517684			1.542	0.461961			3.9244	0.41113
	3.4174	0.04897							3.9274	0.27557			1.543	0.517618			1.543	0.461954			3.9274	0.41118
	3.4196	0.04797							3.9304	0.27586			1.544	0.517543			1.544	0.461953			3.9304	0.41116
	3.4219	0.04704							3.9333	0.27608			1.545	0.517474			1.545	0.461961			3.9333	0.41114
	3.4241	0.04657							3.9363	0.27629			1.546	0.517407			1.546	0.461981			3.9363	0.41111
	3.4264	0.0466							3.9393	0.2765			1.547	0.517333			1.547	0.462006			3.9393	0.41122
	3.4287	0.04682							3.9423	0.27674			1.548	0.517245			1.548	0.462017			3.9423	0.41122
	3.4309	0.04717							3.9453	0.27693			1.549	0.517156			1.549	0.462025			3.9453	0.41127
	3.4332	0.04754							3.9483	0.27713			1.55	0.517062			1.55	0.462016			3.9483	0.41131
	3.4355	0.04803							3.9513	0.27738			1.551	0.516974			1.551	0.462001			3.9513	0.41129
	3.4378	0.04874							3.9543	0.27756			1.552	0.516906			1.552	0.461994			3.9543	0.41133
	3.44	0.04942							3.9574	0.27768			1.553	0.516841			1.553	0.461979			3.9574	0.41136
	3.4423	0.05034							3.9604	0.2779			1.554	0.516776			1.554	0.461954			3.9604	0.41138
	3.4446	0.05123							3.9634	0.27812			1.555	0.516711			1.555	0.461941			3.9634	0.41142
	3.4469	0.05216							3.9664	0.27837			1.556	0.516638			1.556	0.461944			3.9664	0.41145
	3.4492	0.05331							3.9695	0.27857			1.557	0.516573			1.557	0.46195			3.9695	0.41148
	3.4515	0.05458							3.9725	0.27873			1.558	0.516496			1.558	0.461939			3.9725	0.4115
	3.4538	0.05596							3.9756	0.27891			1.559	0.516412			1.559	0.461925			3.9756	0.4115
	3.4561	0.05745							3.9786	0.27912			1.56	0.516333			1.56	0.46191			3.9786	0.41145
	3.4584	0.05903							3.9817	0.27936			1.561	0.516252			1.561	0.461893			3.9817	0.4114
	3.4607	0.06044							3.9847	0.27953			1.562	0.516176			1.562	0.461885			3.9847	0.41155
	3.463	0.06197							3.9878	0.27964			1.563	0.516094			1.563	0.461867			3.9878	0.41151
	3.4653	0.06379							3.9909	0.27985			1.564	0.516018			1.564	0.461857			3.9909	0.4115
	3.4676	0.06549							3.9939	0.28006			1.565	0.515947			1.565	0.461859			3.9939	0.41155
	3.47	0.06726							3.997	0.28024			1.566	0.515857			1.566	0.461858			3.997	0.41158
	3.4723	0.06906							4.0001	0.28043			1.567	0.515765			1.567	0.461857			4.0001	0.4116
	3.4746	0.07101							4.0032	0.28065			1.568	0.515678			1.568	0.461862			4.0032	0.41161
	3.477	0.07309							4.0063	0.28077			1.569	0.515578			1.569	0.461864			4.0063	0.41156
	3.4793	0.07544							4.0094	0.28096			1.57	0.515468			1.57	0.461862			4.0094	0.41154
	3.4816	0.07808							4.0125	0.28106			1.571	0.515356			1.571	0.46185			4.0125	0.41155
	3.484	0.08133							4.0156	0.28113			1.572	0.515254			1.572	0.46183			4.0156	0.41163
	3.4863	0.08521							4.0187	0.28121			1.573	0.515157			1.573	0.461807			4.0187	0.4116
	3.4887	0.08999							4.0218	0.28137			1.574	0.515052			1.574	0.461769			4.0218	0.41157
	3.491	0.09536							4.0249	0.28151			1.575	0.514951			1.575	0.461728			4.0249	0.41155
	3.4934	0.10142							4.0281	0.28166			1.576	0.514849			1.576	0.46169			4.0281	0.41152
	3.4957	0.10822							4.0312	0.28174			1.577	0.514743			1.577	0.461657			4.0312	0.41149
	3.4981	0.11538							4.0343	0.28188			1.578	0.514652			1.578	0.461632			4.0343	0.41153
	3.5004	0.1228							4.0375	0.28205			1.579	0.514569			1.579	0.461617			4.0375	0.41147
	3.5028	0.13008							4.0406	0.28218			1.58	0.514461			1.58	0.461606			4.0406	0.41152
	3.5052	0.13673							4.0438	0.28229			1.581	0.514342			1.581	0.461596			4.0438	0.41148
	3.5075	0.14278							4.0469	0.28235			1.582	0.514199			1.582	0.461589			4.0469	0.41138
	3.5099	0.14819							4.0501	0.2824			1.583	0.514063			1.583	0.461589			4.0501	0.41137
	3.5123	0.15308							4.0533	0.28253			1.584	0.513956			1.584	0.461578			4.0533	0.41132
	3.5147	0.1574							4.0564	0.28259			1.585	0.513856			1.585	0.461555			4.0564	0.41124
	3.5171	0.16143							4.0596	0.28264			1.586	0.513764			1.586	0.461511			4.0596	0.41115
	3.5194	0.16483							4.0628	0.2827			1.587	0.513673			1.587	0.461454			4.0628	0.41112
	3.5218	0.1675							4.066	0.28283			1.588	0.513575			1.588	0.46139			4.066	0.41107
	3.5242	0.16946							4.0692	0.28289			1.589	0.513473			1.589	0.461315			4.0692	0.41097
	3.5266	0.17071							4.0724	0.28291			1.59	0.51336			1.59	0.461246			4.0724	0.41086
	3.529	0.17119							4.0756	0.28299			1.591	0.513245			1.591	0.461192			4.0756	0.41078
	3.5314	0.17205							4.0788	0.28304			1.592	0.513137			1.592	0.46114			4.0788	0.41071
	3.5338	0.17425							4.082	0.28301			1.593	0.513035			1.593	0.4611			4.082	0.4106
	3.5362	0.17733							4.0852	0.28309			1.594	0.512923			1.594	0.461055			4.0852	0.41048
	3.5387	0.18067							4.0884	0.28306			1.595	0.51281			1.595	0.461012			4.0884	0.41031
	3.5411	0.18406							4.0917	0.28304			1.596	0.512682			1.596	0.460953			4.0917	0.41017
	3.5435	0.18742							4.0949	0.28308			1.597	0.51255			1.597	0.460886			4.0949	0.41014
	3.5459	0.1904							4.0981	0.28311			1.598	0.512417			1.598	0.460825			4.0981	0.41006
	3.5483	0.19293							4.1014	0.28311			1.599	0.512286			1.599	0.460763			4.1014	0.40992
	3.5508	0.19541							4.1046	0.28316			1.6	0.512159			1.6	0.460714			4.1046	0.40979
	3.5532	0.19757							4.1079	0.28321			1.601	0.512041			1.601	0.460681			4.1079	0.40963
	3.5556	0.1995							4.1111	0.2832			1.602	0.511922			1.602	0.460651			4.1111	0.40954
	3.5581	0.2014							4.1144	0.28315			1.603	0.511804			1.603	0.460635			4.1144	0.40945
	3.5605	0.20323							4.1177	0.28317			1.604	0.511672			1.604	0.460613			4.1177	0.40931
	3.563	0.2051							4.1209	0.28318			1.605	0.511543			1.605	0.460597			4.1209	0.40918
	3.5654	0.20663							4.1242	0.28321			1.606	0.511407			1.606	0.46056			4.1242	0.40911
	3.5679	0.20817							4.1275	0.28319			1.607	0.511257			1.607	0.460505			4.1275	0.40897
	3.5703	0.20961							4.1308	0.28314			1.608	0.511119			1.608	0.460462			4.1308	0.40881
	3.5728	0.2109							4.1341	0.28311			1.609	0.510987			1.609	0.460413			4.1341	0.40865
	3.5753	0.21206							4.1374	0.28308			1.61	0.510861			1.61	0.460371			4.1374	0.4085
	3.5777	0.21348							4.1407	0.28298			1.611	0.51074			1.611	0.460335			4.1407	0.4083
	3.5802	0.21495							4.144	0.28309			1.612	0.510613			1.612	0.460294			4.144	0.40825
	3.5827	0.21614							4.1473	0.28314			1.613	0.510477			1.613	0.460246			4.1473	0.40819
	3.5852	0.21718							4.1506	0.28305			1.614	0.510338			1.614	0.460204			4.1506	0.40805
	3.5876	0.21843							4.154	0.28302			1.615	0.510203			1.615	0.460179			4.154	0.40788
	3.5901	0.21977							4.1573	0.28306			1.616	0.510073			1.616	0.460159			4.1573	0.4078
	3.5926	0.22102							4.1606	0.28304			1.617	0.509937			1.617	0.460135			4.1606	0.40766
	3.5951	0.222							4.164	0.28302			1.618	0.5098			1.618	0.4601			4.164	0.4075
	3.5976	0.22299							4.1673	0.28299			1.619	0.509679			1.619	0.460055			4.1673	0.40733
	3.6001	0.22431							4.1707	0.28304			1.62	0.509539			1.62	0.459993			4.1707	0.40713
	3.6026	0.22547							4.174	0.28303			1.621	0.509382			1.621	0.459938			4.174	0.40697
	3.6051	0.22634							4.1774	0.28291			1.622	0.50922			1.622	0.459883			4.1774	0.40683
	3.6076	0.22736							4.1808	0.28286			1.623	0.509066			1.623	0.45982			4.1808	0.40673
	3.6101	0.22846							4.1841	0.28285			1.624	0.508925			1.624	0.459764			4.1841	0.40664
	3.6126	0.22958							4.1875	0.28285			1.625	0.508793			1.625	0.459726			4.1875	0.4064
	3.6152	0.23085							4.1909	0.28282			1.626	0.508651			1.626	0.459675			4.1909	0.40626
	3.6177	0.23202							4.1943	0.28281			1.627	0.508506			1.627	0.459613			4.1943	0.40617
	3.6202	0.23287							4.1977	0.28281			1.628	0.508365			1.628	0.459556			4.1977	0.40607
	3.6227	0.23391							4.2011	0.28282			1.629	0.508231			1.629	0.459499			4.2011	0.40596
	3.6253	0.23508							4.2045	0.2828			1.63	0.508095			1.63	0.459443			4.2045	0.40592
	3.6278	0.23626							4.2079	0.28283			1.631	0.507969			1.631	0.459408			4.2079	0.40575
	3.6303	0.23714							4.2113	0.28302			1.632	0.507825			1.632	0.459367			4.2113	0.40575
	3.6329	0.23796							4.2147	0.28316			1.633	0.507662			1.633	0.459325			4.2147	0.40584
	3.6354	0.2389							4.2182	0.28327			1.634	0.507493			1.634	0.459274			4.2182	0.40591
	3.638	0.23995							4.2216	0.28333			1.635	0.507326			1.635	0.459209			4.2216	0.40587
	3.6405	0.24093							4.225	0.28343			1.636	0.507163			1.636	0.45914			4.225	0.40584
	3.6431	0.2418							4.2285	0.28353			1.637	0.507002			1.637	0.459059			4.2285	0.40585
	3.6457	0.24263							4.2319	0.28357			1.638	0.506839			1.638	0.458967			4.2319	0.4058
	3.6482	0.24347							4.2354	0.28359			1.639	0.506687			1.639	0.458883			4.2354	0.40566
	3.6508	0.24426							4.2389	0.28369			1.64	0.506537			1.64	0.458808			4.2389	0.4055
	3.6534	0.24509							4.2423	0.28356			1.641	0.506382			1.641	0.458734			4.2423	0.40528
	3.6559	0.24587							4.2458	0.28342			1.642	0.506231			1.642	0.458674			4.2458	0.40496
	3.6585	0.24657							4.2493	0.28326			1.643	0.506065			1.643	0.458617			4.2493	0.40437
	3.6611	0.2473							4.2528	0.28304			1.644	0.505905			1.644	0.458557			4.2528	0.40382
	3.6637	0.24796							4.2563	0.28267			1.645	0.505744			1.645	0.458494			4.2563	0.40335
	3.6663	0.24844							4.2598	0.28243			1.646	0.505585			1.646	0.458431			4.2598	0.40313
	3.6689	0.24886							4.2633	0.2825			1.647	0.505433			1.647	0.458351			4.2633	0.4032
	3.6715	0.24926							4.2668	0.2827			1.648	0.50529			1.648	0.458283			4.2668	0.40328
	3.6741	0.24953							4.2703	0.28287			1.649	0.50514			1.649	0.458225			4.2703	0.40325
	3.6767	0.24961							4.2738	0.28302			1.65	0.505008			1.65	0.458155			4.2738	0.40311
	3.6793	0.24975							4.2773	0.28305			1.651	0.504888			1.651	0.458078			4.2773	0.40295
	3.6819	0.24991							4.2809	0.28305			1.652	0.504759			1.652	0.45801			4.2809	0.40276
	3.6845	0.25023							4.2844	0.28297			1.653	0.504636			1.653	0.457949			4.2844	0.40258
	3.6872	0.25032							4.288	0.2829			1.654	0.504509			1.654	0.457895			4.288	0.40241
	3.6898	0.25013							4.2915	0.28282			1.655	0.504371			1.655	0.457837			4.2915	0.40214
	3.6924	0.24984							4.2951	0.28278			1.656	0.50424			1.656	0.457774			4.2951	0.40192
	3.695	0.24939							4.2986	0.28265			1.657	0.504105			1.657	0.457702			4.2986	0.40166
	3.6977	0.2486							4.3022	0.28257			1.658	0.503976			1.658	0.457623			4.3022	0.4013
	3.7003	0.24758							4.3058	0.28254			1.659	0.503853			1.659	0.457538			4.3058	0.40106
	3.703	0.2464							4.3093	0.28252			1.66	0.503721			1.66	0.457449			4.3093	0.40092
	3.7056	0.24492							4.3129	0.28244			1.661	0.503582			1.661	0.457369			4.3129	0.40057
	3.7083	0.24267							4.3165	0.2824			1.662	0.503424			1.662	0.457299			4.3165	0.40016
	3.7109	0.23947							4.3201	0.28232			1.663	0.503258			1.663	0.457232			4.3201	0.39988
	3.7136	0.23557							4.3237	0.28228			1.664	0.503084			1.664	0.457154			4.3237	0.3997
	3.7162	0.23083							4.3273	0.28219			1.665	0.502893			1.665	0.457069			4.3273	0.39942
	3.7189	0.22483							4.3309	0.28215			1.666	0.502717			1.666	0.456983			4.3309	0.39914
	3.7216	0.21782							4.3346	0.28215			1.667	0.502546			1.667	0.456889			4.3346	0.39885
	3.7242	0.21							4.3382	0.28222			1.668	0.502386			1.668	0.456826			4.3382	0.39862
	3.7269	0.20157							4.3418	0.2822			1.669	0.50223			1.669	0.456775			4.3418	0.39832
	3.7296	0.19261							4.3455	0.28219			1.67	0.5021			1.67	0.456735			4.3455	0.39809
	3.7323	0.18384							4.3491	0.28212			1.671	0.501976			1.671	0.456696			4.3491	0.39787
	3.735	0.17557							4.3528	0.28214			1.672	0.501842			1.672	0.456642			4.3528	0.39768
	3.7377	0.16781							4.3564	0.28215			1.673	0.501729			1.673	0.456589			4.3564	0.39745
	3.7404	0.16026							4.3601	0.28214			1.674	0.501642			1.674	0.456537			4.3601	0.39719
	3.7431	0.15312							4.3638	0.28214			1.675	0.501548			1.675	0.456482			4.3638	0.39701
	3.7458	0.1467							4.3674	0.28222			1.676	0.501456			1.676	0.45643			4.3674	0.39681
	3.7485	0.14067							4.3711	0.2822			1.677	0.50136			1.677	0.456377			4.3711	0.39652
	3.7512	0.1348							4.3748	0.28211			1.678	0.501234			1.678	0.456327			4.3748	0.39628
	3.7539	0.12909							4.3785	0.28212			1.679	0.501097			1.679	0.456282			4.3785	0.39599
	3.7566	0.12376							4.3822	0.28215			1.68	0.500962			1.68	0.456239			4.3822	0.39576
	3.7593	0.1187							4.3859	0.28207			1.681	0.500824			1.681	0.45619			4.3859	0.39549
	3.7621	0.11396							4.3896	0.28209			1.682	0.500722			1.682	0.456153			4.3896	0.39531
	3.7648	0.10927							4.3933	0.28216			1.683	0.500628			1.683	0.456122			4.3933	0.39501
	3.7675	0.10466							4.3971	0.28221			1.684	0.500527			1.684	0.456085			4.3971	0.39476
	3.7703	0.10051							4.4008	0.28215			1.685	0.500437			1.685	0.456049			4.4008	0.39454
	3.773	0.09668							4.4045	0.28212			1.686	0.50033			1.686	0.456			4.4045	0.39426
	3.7758	0.09294							4.4083	0.28215			1.687	0.500209			1.687	0.455945			4.4083	0.394
	3.7785	0.08942							4.412	0.28218			1.688	0.500076			1.688	0.455879			4.412	0.39371
	3.7813	0.08617							4.4158	0.28216			1.689	0.499944			1.689	0.455808			4.4158	0.39344
	3.784	0.08351							4.4196	0.28224			1.69	0.499799			1.69	0.45574			4.4196	0.39316
	3.7868	0.08135							4.4233	0.28226			1.691	0.499641			1.691	0.455672			4.4233	0.39284
	3.7896	0.07944							4.4271	0.28222			1.692	0.499482			1.692	0.455602			4.4271	0.39263
	3.7923	0.07788							4.4309	0.28215			1.693	0.499326			1.693	0.45553			4.4309	0.39229
	3.7951	0.07685							4.4347	0.28213			1.694	0.499185			1.694	0.455475			4.4347	0.39196
	3.7979	0.07594							4.4385	0.28215			1.695	0.49906			1.695	0.455434			4.4385	0.39165
	3.8007	0.07511							4.4423	0.28215			1.696	0.498948			1.696	0.455408			4.4423	0.39128
	3.8035	0.07439							4.4461	0.28214			1.697	0.498835			1.697	0.455379			4.4461	0.39092
	3.8063	0.07397							4.4499	0.28223			1.698	0.498717			1.698	0.455316			4.4499	0.39063
	3.8091	0.07368							4.4537	0.28215			1.699	0.498587			1.699	0.455238			4.4537	0.39034
	3.8119	0.07323							4.4576	0.28211			1.7	0.498445			1.7	0.455168			4.4576	0.39
	3.8147	0.07278							4.4614	0.2821			1.701	0.498331			1.701	0.455129			4.4614	0.3896
	3.8175	0.07231							4.4652	0.28206			1.702	0.498218			1.702	0.455104			4.4652	0.38922
	3.8203	0.07185							4.4691	0.28198			1.703	0.498112			1.703	0.455089			4.4691	0.38885
	3.8231	0.07133							4.4729	0.28196			1.704	0.49801			1.704	0.455095			4.4729	0.38845
	3.8259	0.07066							4.4768	0.2819			1.705	0.497915			1.705	0.455113			4.4768	0.38806
	3.8288	0.07002							4.4807	0.28187			1.706	0.497832			1.706	0.455139			4.4807	0.38762
	3.8316	0.06929							4.4845	0.28179			1.707	0.497748			1.707	0.455165			4.4845	0.38713
	3.8344	0.06846							4.4884	0.28171			1.708	0.497664			1.708	0.455194			4.4884	0.3867
	3.8373	0.06773							4.4923	0.28157			1.709	0.497576			1.709	0.455215			4.4923	0.38627
	3.8401	0.06701							4.4962	0.2815			1.71	0.497489			1.71	0.455214			4.4962	0.38584
	3.8429	0.06624							4.5001	0.28142			1.711	0.497399			1.711	0.4552			4.5001	0.38534
	3.8458	0.06549							4.504	0.28132			1.712	0.497335			1.712	0.455176			4.504	0.38486
	3.8487	0.06462							4.5079	0.28124			1.713	0.497273			1.713	0.455154			4.5079	0.38445
	3.8515	0.06386							4.5119	0.28112			1.714	0.497215			1.714	0.455145			4.5119	0.38398
	3.8544	0.06322							4.5158	0.28091			1.715	0.497162			1.715	0.455136			4.5158	0.3834
	3.8572	0.06267							4.5197	0.28083			1.716	0.497121			1.716	0.455121			4.5197	0.38289
	3.8601	0.0622							4.5237	0.2807			1.717	0.497078			1.717	0.455111			4.5237	0.3823
	3.863	0.06187							4.5276	0.28048			1.718	0.497007			1.718	0.455076			4.5276	0.38172
	3.8659	0.06134							4.5316	0.28019			1.719	0.496938			1.719	0.455041			4.5316	0.38112
	3.8688	0.06067							4.5356	0.27997			1.72	0.496868			1.72	0.455035			4.5356	0.38049
	3.8716	0.05976							4.5395	0.27978			1.721	0.496785			1.721	0.455025			4.5395	0.37987
	3.8745	0.05853							4.5435	0.2796			1.722	0.496718			1.722	0.455016			4.5435	0.37923
	3.8774	0.05696							4.5475	0.27937			1.723	0.496644			1.723	0.455			4.5475	0.37859
	3.8803	0.05525							4.5515	0.27914			1.724	0.496542			1.724	0.454981			4.5515	0.37793
	3.8832	0.05336							4.5555	0.2789			1.725	0.496429			1.725	0.454964			4.5555	0.37715
	3.8862	0.05138							4.5595	0.27869			1.726	0.496283			1.726	0.45493			4.5595	0.37626
	3.8891	0.04944							4.5635	0.27845			1.727	0.496147			1.727	0.454897			4.5635	0.37528
	3.892	0.04751							4.5675	0.27819			1.728	0.496022			1.728	0.454854			4.5675	0.37429
	3.8949	0.04564							4.5715	0.27788			1.729	0.495911			1.729	0.45482			4.5715	0.37325
	3.8978	0.0441							4.5756	0.27761			1.73	0.495808			1.73	0.454776			4.5756	0.37221
	3.9008	0.04288							4.5796	0.27739			1.731	0.495719			1.731	0.454733			4.5796	0.37098
	3.9037	0.04184							4.5837	0.27721			1.732	0.495647			1.732	0.454675			4.5837	0.36967
	3.9067	0.04084							4.5877	0.27691			1.733	0.495553			1.733	0.454614			4.5877	0.36831
	3.9096	0.03998							4.5918	0.27666			1.734	0.495439			1.734	0.454561			4.5918	0.36688
	3.9126	0.03934							4.5959	0.27637			1.735	0.495335			1.735	0.45451			4.5959	0.36547
	3.9155	0.03884							4.5999	0.27613			1.736	0.495237			1.736	0.454462			4.5999	0.36418
	3.9185	0.03836							4.604	0.2759			1.737	0.495141			1.737	0.454431			4.604	0.36286
	3.9214	0.03794							4.6081	0.27559			1.738	0.49504			1.738	0.454414			4.6081	0.36154
	3.9244	0.03753							4.6122	0.2753			1.739	0.49494			1.739	0.454388			4.6122	0.36026
	3.9274	0.03721							4.6163	0.27507			1.74	0.494857			1.74	0.454368			4.6163	0.35911
	3.9304	0.03691							4.6204	0.27479			1.741	0.494767			1.741	0.454364			4.6204	0.35803
	3.9333	0.03667							4.6246	0.27451			1.742	0.494671			1.742	0.454364			4.6246	0.35709
	3.9363	0.03659							4.6287	0.27425			1.743	0.494587			1.743	0.454364			4.6287	0.3562
	3.9393	0.03645							4.6328	0.27395			1.744	0.494523			1.744	0.454376			4.6328	0.35535
	3.9423	0.03617							4.637	0.27365			1.745	0.49446			1.745	0.454375			4.637	0.35449
	3.9453	0.03615							4.6411	0.27341			1.746	0.494398			1.746	0.454366			4.6411	0.3536
	3.9483	0.03615							4.6453	0.2731			1.747	0.494328			1.747	0.454355			4.6453	0.35267
	3.9513	0.03617							4.6494	0.2728			1.748	0.494249			1.748	0.454351			4.6494	0.35173
	3.9543	0.03624							4.6536	0.27252			1.749	0.49416			1.749	0.454311			4.6536	0.35066
	3.9574	0.03675							4.6578	0.27228			1.75	0.49407			1.75	0.454251			4.6578	0.3496
	3.9604	0.03761							4.662	0.27194			1.751	0.493962			1.751	0.4542			4.662	0.34836
	3.9634	0.03879							4.6662	0.27156			1.752	0.493849			1.752	0.454155			4.6662	0.34709
	3.9664	0.04051							4.6704	0.27115			1.753	0.493751			1.753	0.454124			4.6704	0.34583
	3.9695	0.04291							4.6746	0.27087			1.754	0.493664			1.754	0.454112			4.6746	0.34447
	3.9725	0.04624							4.6788	0.27055			1.755	0.49359			1.755	0.454104			4.6788	0.34304
	3.9756	0.05036							4.683	0.2702			1.756	0.493516			1.756	0.454087			4.683	0.34163
	3.9786	0.05547							4.6873	0.26977			1.757	0.493487			1.757	0.454079			4.6873	0.34025
	3.9817	0.06174							4.6915	0.2694			1.758	0.493473			1.758	0.454077			4.6915	0.33886
	3.9847	0.06891							4.6958	0.26899			1.759	0.493463			1.759	0.454081			4.6958	0.33737
	3.9878	0.07687							4.7	0.26858			1.76	0.493452			1.76	0.454085			4.7	0.33591
	3.9909	0.08529							4.7043	0.2681			1.761	0.493413			1.761	0.454093			4.7043	0.33439
	3.9939	0.09427							4.7086	0.26768			1.762	0.493365			1.762	0.454097			4.7086	0.33299
	3.997	0.1039							4.7129	0.26724			1.763	0.493278			1.763	0.45408			4.7129	0.33155
	4.0001	0.11414							4.7171	0.26678			1.764	0.493188			1.764	0.454062			4.7171	0.33011
	4.0032	0.12461							4.7214	0.26621			1.765	0.493109			1.765	0.454035			4.7214	0.3287
	4.0063	0.13539							4.7257	0.2656			1.766	0.493028			1.766	0.454012			4.7257	0.32736
	4.0094	0.14646							4.7301	0.26491			1.767	0.492945			1.767	0.453996			4.7301	0.32595
	4.0125	0.15753							4.7344	0.26434			1.768	0.492863			1.768	0.45397			4.7344	0.32458
	4.0156	0.16863							4.7387	0.26377			1.769	0.492787			1.769	0.453928			4.7387	0.32317
	4.0187	0.17944							4.743	0.26311			1.77	0.492714			1.77	0.45389			4.743	0.32181
	4.0218	0.18981							4.7474	0.26237			1.771	0.492624			1.771	0.453844			4.7474	0.3205
	4.0249	0.19979							4.7517	0.26165			1.772	0.49254			1.772	0.453813			4.7517	0.3192
	4.0281	0.20915							4.7561	0.26091			1.773	0.492508			1.773	0.453823			4.7561	0.31791
	4.0312	0.21787							4.7605	0.26012			1.774	0.492481			1.774	0.453841			4.7605	0.31673
	4.0343	0.22614							4.7648	0.25927			1.775	0.492441			1.775	0.453871			4.7648	0.31557
	4.0375	0.23402							4.7692	0.25849			1.776	0.492414			1.776	0.45389			4.7692	0.31444
	4.0406	0.24137							4.7736	0.25761			1.777	0.492406			1.777	0.453884			4.7736	0.31334
	4.0438	0.24798							4.778	0.25668			1.778	0.49239			1.778	0.453885			4.778	0.31232
	4.0469	0.25418							4.7824	0.25576			1.779	0.492348			1.779	0.453894			4.7824	0.31134
	4.0501	0.26007							4.7868	0.25487			1.78	0.492322			1.78	0.4539			4.7868	0.31036
	4.0533	0.26543							4.7913	0.25389			1.781	0.492323			1.781	0.453904			4.7913	0.30937
	4.0564	0.27026							4.7957	0.25297			1.782	0.492327			1.782	0.453919			4.7957	0.30849
	4.0596	0.27468							4.8001	0.25204			1.783	0.492323			1.783	0.453918			4.8001	0.30755
	4.0628	0.2789							4.8046	0.25113			1.784	0.492306			1.784	0.453928			4.8046	0.3066
	4.066	0.28286							4.809	0.25021			1.785	0.492266			1.785	0.45395			4.809	0.30559
	4.0692	0.28651							4.8135	0.24944			1.786	0.492229			1.786	0.453975			4.8135	0.30463
	4.0724	0.28989							4.818	0.24878			1.787	0.49219			1.787	0.453987			4.818	0.30363
	4.0756	0.29276							4.8225	0.24823			1.788	0.492127			1.788	0.453974			4.8225	0.30264
	4.0788	0.29525							4.8269	0.24777			1.789	0.492044			1.789	0.453948			4.8269	0.3016
	4.082	0.29759							4.8314	0.24754			1.79	0.491982			1.79	0.453947			4.8314	0.30057
	4.0852	0.29981							4.8359	0.24741			1.791	0.491911			1.791	0.453948			4.8359	0.29948
	4.0884	0.30176							4.8405	0.24741			1.792	0.491867			1.792	0.453957			4.8405	0.29837
	4.0917	0.30361							4.845	0.24746			1.793	0.491833			1.793	0.453956			4.845	0.29728
	4.0949	0.30534							4.8495	0.24757			1.794	0.491788			1.794	0.453938			4.8495	0.29615
	4.0981	0.30697							4.8541	0.24763			1.795	0.49174			1.795	0.453916			4.8541	0.29498
	4.1014	0.30835							4.8586	0.24771			1.796	0.491682			1.796	0.453882			4.8586	0.29386
	4.1046	0.30954							4.8632	0.24775			1.797	0.491619			1.797	0.453845			4.8632	0.29272
	4.1079	0.31058							4.8677	0.24777			1.798	0.49157			1.798	0.45384			4.8677	0.29156
	4.1111	0.31138							4.8723	0.2477			1.799	0.49152			1.799	0.453835			4.8723	0.29039
	4.1144	0.31216							4.8769	0.24748			1.8	0.49149			1.8	0.453838			4.8769	0.28916
	4.1177	0.31287							4.8815	0.2472			1.801	0.491473			1.801	0.45386			4.8815	0.28794
	4.1209	0.31371							4.8861	0.24687			1.802	0.491417			1.802	0.453871			4.8861	0.28672
	4.1242	0.3146							4.8907	0.24639			1.803	0.491351			1.803	0.453883			4.8907	0.28549
	4.1275	0.31542							4.8953	0.24587			1.804	0.491251			1.804	0.453887			4.8953	0.28424
	4.1308	0.31628							4.8999	0.24525			1.805	0.491161			1.805	0.453893			4.8999	0.28296
	4.1341	0.31706							4.9046	0.24456			1.806	0.49108			1.806	0.453905			4.9046	0.28165
	4.1374	0.31785							4.9092	0.24376			1.807	0.491			1.807	0.453917			4.9092	0.28033
	4.1407	0.31852							4.9139	0.24298			1.808	0.490945			1.808	0.453913			4.9139	0.27906
	4.144	0.31922							4.9185	0.24219			1.809	0.490894			1.809	0.453902			4.9185	0.27778
	4.1473	0.3201							4.9232	0.24138			1.81	0.490861			1.81	0.453904			4.9232	0.27645
	4.1506	0.32109							4.9279	0.24056			1.811	0.49082			1.811	0.453879			4.9279	0.27511
	4.154	0.32198							4.9326	0.23984			1.812	0.490753			1.812	0.453816			4.9326	0.27381
	4.1573	0.32277							4.9373	0.23915			1.813	0.490686			1.813	0.453769			4.9373	0.27247
	4.1606	0.32346							4.942	0.23848			1.814	0.490605			1.814	0.453713			4.942	0.27118
	4.164	0.3241							4.9467	0.23785			1.815	0.490548			1.815	0.453665			4.9467	0.26994
	4.1673	0.32461							4.9514	0.23738			1.816	0.490533			1.816	0.453632			4.9514	0.26877
	4.1707	0.32521							4.9562	0.23688			1.817	0.490506			1.817	0.453597			4.9562	0.26755
	4.174	0.32589							4.9609	0.23638			1.818	0.490482			1.818	0.453564			4.9609	0.26646
	4.1774	0.32641							4.9656	0.23582			1.819	0.490442			1.819	0.453551			4.9656	0.2654
	4.1808	0.32661							4.9704	0.23527			1.82	0.490359			1.82	0.45354			4.9704	0.26439
	4.1841	0.32703							4.9752	0.23462			1.821	0.49032			1.821	0.453544			4.9752	0.26348
	4.1875	0.32742							4.98	0.23395			1.822	0.490316			1.822	0.453563			4.98	0.26271
	4.1909	0.32763							4.9847	0.2332			1.823	0.49028			1.823	0.453559			4.9847	0.26196
	4.1943	0.32776							4.9895	0.23248			1.824	0.490221			1.824	0.453546			4.9895	0.2613
	4.1977	0.32782							4.9943	0.23168			1.825	0.490156			1.825	0.453517			4.9943	0.26073
	4.2011	0.32783							4.9992	0.23094			1.826	0.49009			1.826	0.453478			4.9992	0.26026
	4.2045	0.32783							5.004	0.23022			1.827	0.490051			1.827	0.453471			5.004	0.25977
	4.2079	0.32786							5.0088	0.22957			1.828	0.49002			1.828	0.453468			5.0088	0.25943
	4.2113	0.32813							5.0137	0.22899			1.829	0.490026			1.829	0.453479			5.0137	0.25917
	4.2147	0.32843							5.0185	0.22849			1.83	0.490045			1.83	0.453505			5.0185	0.25896
	4.2182	0.32867							5.0234	0.22802			1.831	0.490045			1.831	0.453505			5.0234	0.25885
	4.2216	0.32876							5.0283	0.22767			1.832	0.490043			1.832	0.453574			5.0283	0.25875
	4.225	0.32884							5.0331	0.2274			1.833	0.490044			1.833	0.453582			5.0331	0.25862
	4.2285	0.32863							5.038	0.22723			1.834	0.490037			1.834	0.453582			5.038	0.25857
	4.2319	0.32817							5.0429	0.22706			1.835	0.490001			1.835	0.453608			5.0429	0.25853
	4.2354	0.32754							5.0478	0.22695			1.836	0.489984			1.836	0.453643			5.0478	0.25855
	4.2389	0.3269							5.0528	0.22686			1.837	0.489995			1.837	0.453698			5.0528	0.25859
	4.2423	0.32598							5.0577	0.22682			1.838	0.490026			1.838	0.453763			5.0577	0.25868
	4.2458	0.32511							5.0626	0.22679			1.839	0.490074			1.839	0.453832			5.0626	0.25869
	4.2493	0.32416							5.0676	0.22681			1.84	0.490171			1.84	0.453869			5.0676	0.25867
	4.2528	0.32315							5.0725	0.2268			1.841	0.49028			1.841	0.453914			5.0725	0.25871
	4.2563	0.32217							5.0775	0.2268			1.842	0.490364			1.842	0.453933			5.0775	0.2588
	4.2598	0.32125							5.0825	0.2268			1.843	0.490439			1.843	0.453947			5.0825	0.2588
	4.2633	0.32058							5.0875	0.22684			1.844	0.490502			1.844	0.454009			5.0875	0.25875
	4.2668	0.32025							5.0925	0.22682			1.845	0.490587			1.845	0.454124			5.0925	0.25874
	4.2703	0.32001							5.0975	0.22685			1.846	0.490671			1.846	0.454265			5.0975	0.25881
	4.2738	0.31984							5.1025	0.2268			1.847	0.490727			1.847	0.454386			5.1025	0.25884
	4.2773	0.31965							5.1075	0.22676			1.848	0.490794			1.848	0.454497			5.1075	0.25884
	4.2809	0.31954							5.1126	0.22665			1.849	0.490846			1.849	0.454565			5.1126	0.25879
	4.2844	0.31936							5.1176	0.22663			1.85	0.49088			1.85	0.454634			5.1176	0.25882
	4.288	0.31906							5.1227	0.22653			1.851	0.490858			1.851	0.454697			5.1227	0.2588
	4.2915	0.31854							5.1277	0.22643			1.852	0.490847			1.852	0.454766			5.1277	0.25877
	4.2951	0.31802							5.1328	0.22626			1.853	0.490898			1.853	0.454809			5.1328	0.25867
	4.2986	0.31753							5.1379	0.22612			1.854	0.490951			1.854	0.45484			5.1379	0.2586
	4.3022	0.31705							5.143	0.22603			1.855	0.490983			1.855	0.454874			5.143	0.25853
	4.3058	0.31639							5.1481	0.22601			1.856	0.491007			1.856	0.454922			5.1481	0.25846
	4.3093	0.31568							5.1532	0.22591			1.857	0.491029			1.857	0.454973			5.1532	0.25834
	4.3129	0.31504							5.1583	0.22583			1.858	0.491054			1.858	0.45504			5.1583	0.25824
	4.3165	0.31447							5.1635	0.22578			1.859	0.49109			1.859	0.45511			5.1635	0.25808
	4.3201	0.31395							5.1686	0.22579			1.86	0.491132			1.86	0.455153			5.1686	0.25794
	4.3237	0.31371							5.1738	0.22571			1.861	0.491165			1.861	0.455188			5.1738	0.25779
	4.3273	0.3135							5.179	0.2256			1.862	0.491219			1.862	0.455197			5.179	0.25765
	4.3309	0.31367							5.1841	0.22548			1.863	0.49128			1.863	0.455206			5.1841	0.25745
	4.3346	0.31398							5.1893	0.22541			1.864	0.491346			1.864	0.455205			5.1893	0.25729
	4.3382	0.31413							5.1945	0.22522			1.865	0.491413			1.865	0.455202			5.1945	0.25708
	4.3418	0.31382							5.1997	0.22501			1.866	0.491436			1.866	0.455192			5.1997	0.25686
	4.3455	0.31338							5.205	0.22477			1.867	0.491421			1.867	0.455177			5.205	0.2566
	4.3491	0.31249							5.2102	0.2245			1.868	0.49139			1.868	0.455192			5.2102	0.25631
	4.3528	0.31124							5.2154	0.22419			1.869	0.49134			1.869	0.455266			5.2154	0.25603
	4.3564	0.30985							5.2207	0.22381			1.87	0.491316			1.87	0.455349			5.2207	0.25573
	4.3601	0.30848							5.2259	0.22335			1.871	0.49141			1.871	0.455454			5.2259	0.25548
	4.3638	0.30688							5.2312	0.2229			1.872	0.491497			1.872	0.455554			5.2312	0.25523
	4.3674	0.30538							5.2365	0.22236			1.873	0.491578			1.873	0.455603			5.2365	0.25486
	4.3711	0.30394							5.2418	0.22187			1.874	0.491656			1.874	0.455651			5.2418	0.25447
	4.3748	0.30262							5.2471	0.22129			1.875	0.491698			1.875	0.455711			5.2471	0.25414
	4.3785	0.30126							5.2524	0.2207			1.876	0.491715			1.876	0.455758			5.2524	0.25382
	4.3822	0.29978							5.2577	0.22007			1.877	0.491714			1.877	0.455785			5.2577	0.25341
	4.3859	0.29834							5.2631	0.21944			1.878	0.491696			1.878	0.4558			5.2631	0.25298
	4.3896	0.29711							5.2684	0.21877			1.879	0.491675			1.879	0.455821			5.2684	0.25256
	4.3933	0.29582							5.2738	0.21809			1.88	0.491636			1.88	0.455841			5.2738	0.25218
	4.3971	0.29456							5.2792	0.21737			1.881	0.491596			1.881	0.455857			5.2792	0.25172
	4.4008	0.29346							5.2845	0.21669			1.882	0.491568			1.882	0.455846			5.2845	0.25128
	4.4045	0.29263							5.2899	0.21598			1.883	0.491535			1.883	0.45583			5.2899	0.25088
	4.4083	0.29183							5.2953	0.21528			1.884	0.491535			1.884	0.45582			5.2953	0.2505
	4.412	0.29113							5.3008	0.2144			1.885	0.491536			1.885	0.4558			5.3008	0.25006
	4.4158	0.29058							5.3062	0.2136			1.886	0.491518			1.886	0.455788			5.3062	0.24966
	4.4196	0.29023							5.3116	0.2128			1.887	0.49148			1.887	0.455778			5.3116	0.24928
	4.4233	0.28996							5.3171	0.21202			1.888	0.491447			1.888	0.455766			5.3171	0.24889
	4.4271	0.28966							5.3225	0.21114			1.889	0.491428			1.889	0.455757			5.3225	0.24845
	4.4309	0.28945							5.328	0.21025			1.89	0.491421			1.89	0.455761			5.328	0.248
	4.4347	0.28928							5.3335	0.20935			1.891	0.491474			1.891	0.455832			5.3335	0.24754
	4.4385	0.28906							5.339	0.20849			1.892	0.491532			1.892	0.455907			5.339	0.24713
	4.4423	0.28888							5.3445	0.20758			1.893	0.491508			1.893	0.455894			5.3445	0.24664
	4.4461	0.28858							5.35	0.20671			1.894	0.491486			1.894	0.455881			5.35	0.24614
	4.4499	0.28822							5.3555	0.20576			1.895	0.491515			1.895	0.455906			5.3555	0.24557
	4.4537	0.28791							5.361	0.20478			1.896	0.491559			1.896	0.455945			5.361	0.24497
	4.4576	0.28752							5.3666	0.20384			1.897	0.491599			1.897	0.455988			5.3666	0.24436
	4.4614	0.28699							5.3722	0.20287			1.898	0.491638			1.898	0.456037			5.3722	0.24371
	4.4652	0.28653							5.3777	0.20192			1.899	0.491684			1.899	0.456093			5.3777	0.24308
	4.4691	0.2859							5.3833	0.20104			1.9	0.49173			1.9	0.45615			5.3833	0.24244
	4.4729	0.28527							5.3889	0.20012			1.901	0.491766			1.901	0.456196			5.3889	0.24177
	4.4768	0.28464							5.3945	0.1993			1.902	0.491811			1.902	0.45623			5.3945	0.24104
	4.4807	0.28396							5.4001	0.19856			1.903	0.491849			1.903	0.456259			5.4001	0.24026
	4.4845	0.28303							5.4058	0.19786			1.904	0.491898			1.904	0.456339			5.4058	0.23951
	4.4884	0.28189							5.4114	0.19725			1.905	0.491942			1.905	0.456419			5.4114	0.23871
	4.4923	0.28053							5.4171	0.19676			1.906	0.492032			1.906	0.45653			5.4171	0.23789
	4.4962	0.27914							5.4227	0.1963			1.907	0.492135			1.907	0.456649			5.4227	0.23713
	4.5001	0.2776							5.4284	0.19575			1.908	0.492236			1.908	0.456726			5.4284	0.23622
	4.504	0.27593							5.4341	0.19514			1.909	0.492336			1.909	0.45676			5.4341	0.23525
	4.5079	0.27391							5.4398	0.19483			1.91	0.492439			1.91	0.456799			5.4398	0.23442
	4.5119	0.27167							5.4455	0.19448			1.911	0.492539			1.911	0.456852			5.4455	0.23352
	4.5158	0.26934							5.4512	0.19411			1.912	0.492635			1.912	0.456902			5.4512	0.23266
	4.5197	0.26687							5.457	0.19362			1.913	0.492688			1.913	0.45692			5.457	0.23183
	4.5237	0.2639							5.4627	0.1932			1.914	0.492736			1.914	0.456934			5.4627	0.23105
	4.5276	0.26087							5.4685	0.19275			1.915	0.492805			1.915	0.456988			5.4685	0.23026
	4.5316	0.25775							5.4743	0.19221			1.916	0.492873			1.916	0.457044			5.4743	0.22944
	4.5356	0.25423							5.4801	0.19179			1.917	0.492938			1.917	0.457044			5.4801	0.22879
	4.5395	0.25056							5.4859	0.19129			1.918	0.492993			1.918	0.457015			5.4859	0.22812
	4.5435	0.24687							5.4917	0.19069			1.919	0.493021			1.919	0.457009			5.4917	0.22743
	4.5475	0.24314							5.4975	0.19024			1.92	0.493024			1.92	0.457022			5.4975	0.22686
	4.5515	0.23976							5.5033	0.18972			1.921	0.493039			1.921	0.457036			5.5033	0.22631
	4.5555	0.23667							5.5092	0.18921			1.922	0.49309			1.922	0.457071			5.5092	0.22581
	4.5595	0.23383							5.515	0.18858			1.923	0.493143			1.923	0.457101			5.515	0.2253
	4.5635	0.23109							5.5209	0.18803			1.924	0.493271			1.924	0.457143			5.5209	0.22488
	4.5675	0.22882							5.5268	0.18742			1.925	0.493399			1.925	0.457184			5.5268	0.2245
	4.5715	0.22715							5.5327	0.1868			1.926	0.493503			1.926	0.457281			5.5327	0.2241
	4.5756	0.22577							5.5386	0.18612			1.927	0.493607			1.927	0.457389			5.5386	0.2237
	4.5796	0.22474							5.5445	0.18551			1.928	0.49371			1.928	0.457477			5.5445	0.22337
	4.5837	0.22418							5.5505	0.18489			1.929	0.493812			1.929	0.457553			5.5505	0.22305
	4.5877	0.22407							5.5564	0.18432			1.93	0.493903			1.93	0.457603			5.5564	0.22275
	4.5918	0.22447							5.5624	0.1836			1.931	0.494004			1.931	0.457636			5.5624	0.22243
	4.5959	0.22531							5.5684	0.18297			1.932	0.494111			1.932	0.457691			5.5684	0.22214
	4.5999	0.22677							5.5743	0.18239			1.933	0.494227			1.933	0.457804			5.5743	0.22195
	4.604	0.22878							5.5803	0.1819			1.934	0.494342			1.934	0.457915			5.5803	0.22178
	4.6081	0.23148							5.5864	0.18123			1.935	0.494465			1.935	0.457971			5.5864	0.22142
	4.6122	0.23488							5.5924	0.18064			1.936	0.494588			1.936	0.458027			5.5924	0.22113
	4.6163	0.23893							5.5984	0.18018			1.937	0.494717			1.937	0.458091			5.5984	0.22091
	4.6204	0.24359							5.6045	0.17978			1.938	0.494852			1.938	0.458161			5.6045	0.22073
	4.6246	0.24897							5.6105	0.1793			1.939	0.494992			1.939	0.458273			5.6105	0.22048
	4.6287	0.25497							5.6166	0.17882			1.94	0.495147			1.94	0.458407			5.6166	0.22032
	4.6328	0.26122							5.6227	0.1783			1.941	0.495281			1.941	0.458516			5.6227	0.2201
	4.637	0.2675							5.6288	0.17782			1.942	0.495396			1.942	0.458615			5.6288	0.21992
	4.6411	0.27405							5.6349	0.1774			1.943	0.495531			1.943	0.45873			5.6349	0.21981
	4.6453	0.28065							5.6411	0.17707			1.944	0.495706			1.944	0.458873			5.6411	0.21975
	4.6494	0.28695							5.6472	0.17657			1.945	0.495881			1.945	0.459015			5.6472	0.21955
	4.6536	0.29282							5.6534	0.17593			1.946	0.496032			1.946	0.459072			5.6534	0.21928
	4.6578	0.29844							5.6595	0.17549			1.947	0.496187			1.947	0.459133			5.6595	0.21918
	4.662	0.30363							5.6657	0.17496			1.948	0.496358			1.948	0.459246			5.6657	0.21897
	4.6662	0.30833							5.6719	0.17448			1.949	0.496535			1.949	0.45937			5.6719	0.21881
	4.6704	0.31254							5.6781	0.17406			1.95	0.496726			1.95	0.459476			5.6781	0.21866
	4.6746	0.31636							5.6844	0.17338			1.951	0.496991			1.951	0.459645			5.6844	0.21831
	4.6788	0.31969							5.6906	0.17283			1.952	0.497238			1.952	0.459801			5.6906	0.21799
	4.683	0.32284							5.6969	0.17231			1.953	0.497475			1.953	0.459938			5.6969	0.21766
	4.6873	0.32577							5.7031	0.17166			1.954	0.497679			1.954	0.460078			5.7031	0.2173
	4.6915	0.32844							5.7094	0.17121			1.955	0.497804			1.955	0.460222			5.7094	0.21705
	4.6958	0.33081							5.7157	0.17068			1.956	0.497931			1.956	0.460362			5.7157	0.2166
	4.7	0.33309							5.722	0.16992			1.957	0.498087			1.957	0.460486			5.722	0.21601
	4.7043	0.33527							5.7283	0.16935			1.958	0.498238			1.958	0.460606			5.7283	0.2155
	4.7086	0.33714							5.7347	0.16875			1.959	0.498415			1.959	0.460774			5.7347	0.21491
	4.7129	0.33881							5.741	0.16816			1.96	0.498599			1.96	0.460952			5.741	0.21432
	4.7171	0.34034							5.7474	0.16753			1.961	0.498803			1.961	0.461118			5.7474	0.21366
	4.7214	0.34169							5.7538	0.16692			1.962	0.499009			1.962	0.461267			5.7538	0.2129
	4.7257	0.34309							5.7601	0.16611			1.963	0.499234			1.963	0.46141			5.7601	0.212
	4.7301	0.34417							5.7666	0.16576			1.964	0.499469			1.964	0.461558			5.7666	0.2114
	4.7344	0.34529							5.773	0.16498			1.965	0.499722			1.965	0.461732			5.773	0.2103
	4.7387	0.34647							5.7794	0.16392			1.966	0.500011			1.966	0.461937			5.7794	0.20907
	4.743	0.34751							5.7859	0.16337			1.967	0.500301			1.967	0.462144			5.7859	0.20824
	4.7474	0.34822							5.7923	0.16274			1.968	0.500572			1.968	0.462389			5.7923	0.20728
	4.7517	0.34899							5.7988	0.16206			1.969	0.500831			1.969	0.462628			5.7988	0.20623
	4.7561	0.34968							5.8053	0.16141			1.97	0.501021			1.97	0.462773			5.8053	0.20527
	4.7605	0.3503							5.8118	0.16068			1.971	0.50121			1.971	0.46291			5.8118	0.20432
	4.7648	0.35099							5.8183	0.16016			1.972	0.501471			1.972	0.463071			5.8183	0.20347
	4.7692	0.3517							5.8249	0.15963			1.973	0.501736			1.973	0.463236			5.8249	0.20261
	4.7736	0.35214							5.8314	0.15868			1.974	0.501927			1.974	0.463384			5.8314	0.20154
	4.778	0.35264							5.838	0.15781			1.975	0.50208			1.975	0.463518			5.838	0.2006
	4.7824	0.35311							5.8446	0.15718			1.976	0.502263			1.976	0.463657			5.8446	0.19991
	4.7868	0.35344							5.8512	0.15648			1.977	0.502457			1.977	0.463804			5.8512	0.19921
	4.7913	0.35379							5.8578	0.1558			1.978	0.502654			1.978	0.463969			5.8578	0.19849
	4.7957	0.35418							5.8644	0.15501			1.979	0.502848			1.979	0.46415			5.8644	0.19776
	4.8001	0.35452							5.871	0.15414			1.98	0.503036			1.98	0.46432			5.871	0.19704
	4.8046	0.35486							5.8777	0.15331			1.981	0.503237			1.981	0.464437			5.8777	0.19653
	4.809	0.35506							5.8844	0.15272			1.982	0.50344			1.982	0.464554			5.8844	0.19611
	4.8135	0.35528							5.8911	0.1513			1.983	0.503634			1.983	0.464749			5.8911	0.19521
	4.818	0.35539							5.8978	0.15046			1.984	0.503809			1.984	0.464946			5.8978	0.19479
	4.8225	0.35567							5.9045	0.14929			1.985	0.504079			1.985	0.465162			5.9045	0.1942
	4.8269	0.35584							5.9112	0.14791			1.986	0.504407			1.986	0.465403			5.9112	0.19363
	4.8314	0.35594							5.918	0.14702			1.987	0.504688			1.987	0.465638			5.918	0.19345
	4.8359	0.35595							5.9247	0.14591			1.988	0.504925			1.988	0.465851			5.9247	0.1931
	4.8405	0.3561							5.9315	0.14482			1.989	0.505175			1.989	0.466047			5.9315	0.19289
	4.845	0.35614							5.9383	0.14397			1.99	0.505429			1.99	0.466228			5.9383	0.19289
	4.8495	0.3562							5.9451	0.14247			1.991	0.505683			1.991	0.466414			5.9451	0.19249
	4.8541	0.35627							5.9519	0.14102			1.992	0.50593			1.992	0.466579			5.9519	0.19222
	4.8586	0.3563							5.9588	0.13997			1.993	0.506176			1.993	0.466745			5.9588	0.19223
	4.8632	0.35621							5.9656	0.13882			1.994	0.506385			1.994	0.466914			5.9656	0.19219
	4.8677	0.35621							5.9725	0.13771			1.995	0.506589			1.995	0.467084			5.9725	0.19223
	4.8723	0.35618							5.9794	0.1363			1.996	0.506846			1.996	0.46727			5.9794	0.19202
	4.8769	0.35617							5.9863	0.13513			1.997	0.507112			1.997	0.467457			5.9863	0.19198
	4.8815	0.35603							5.9932	0.13401			1.998	0.507364			1.998	0.46762			5.9932	0.19194
	4.8861	0.35586							6.0002	0.13255			1.999	0.507618			1.999	0.467771			6.0002	0.19172
	4.8907	0.35583							6.0071	0.13135			2	0.507873			2	0.467907			6.0071	0.19165
	4.8953	0.35582							6.0141	0.13037			2.001	0.508073			2.001	0.467989			6.0141	0.19167
	4.8999	0.35566							6.0211	0.1292			2.002	0.508274			2.002	0.468058			6.0211	0.19146
	4.9046	0.35543							6.0281	0.12791			2.003	0.508488			2.003	0.468143			6.0281	0.19121
	4.9092	0.35515							6.0351	0.12679			2.004	0.508676			2.004	0.468221			6.0351	0.19104
	4.9139	0.35503							6.0421	0.12572			2.005	0.508815			2.005	0.468324			6.0421	0.19093
	4.9185	0.35475							6.0492	0.12496			2.006	0.508952			2.006	0.468434			6.0492	0.19101
	4.9232	0.35455							6.0562	0.12357			2.007	0.509147			2.007	0.468584			6.0562	0.19053
	4.9279	0.35423							6.0633	0.12185			2.008	0.509356			2.008	0.468731			6.0633	0.18988
	4.9326	0.35385							6.0704	0.12111			2.009	0.509616			2.009	0.468868			6.0704	0.18991
	4.9373	0.35345							6.0775	0.12029			2.01	0.509884			2.01	0.469017			6.0775	0.18971
	4.942	0.35313							6.0847	0.11919			2.011	0.510145			2.011	0.469168			6.0847	0.18926
	4.9467	0.35266							6.0918	0.1183			2.012	0.510383			2.012	0.469309			6.0918	0.18894
	4.9514	0.35207							6.099	0.11763			2.013	0.510561			2.013	0.469426			6.099	0.18875
	4.9562	0.35151							6.1062	0.11704			2.014	0.510679			2.014	0.469499			6.1062	0.18846
	4.9609	0.35099							6.1134	0.11661			2.015	0.510836			2.015	0.469585			6.1134	0.18827
	4.9656	0.3502							6.1206	0.11599			2.016	0.511097			2.016	0.469736			6.1206	0.18789
	4.9704	0.34938							6.1278	0.11527			2.017	0.511335			2.017	0.469883			6.1278	0.18738
	4.9752	0.34851							6.1351	0.11498			2.018	0.511539			2.018	0.47006			6.1351	0.18715
	4.98	0.34748							6.1423	0.11472			2.019	0.511741			2.019	0.470233			6.1423	0.18697
	4.9847	0.34639							6.1496	0.11449			2.02	0.51193			2.02	0.47036			6.1496	0.18668
	4.9895	0.34523							6.1569	0.11436			2.021	0.51211			2.021	0.470475			6.1569	0.18642
	4.9943	0.34368							6.1643	0.11435			2.022	0.51223			2.022	0.470563			6.1643	0.18616
	4.9992	0.34186							6.1716	0.11424			2.023	0.512343			2.023	0.470648			6.1716	0.18579
	5.004	0.33973							6.1789	0.11432			2.024	0.512492			2.024	0.470791			6.1789	0.18558
	5.0088	0.33733							6.1863	0.11458			2.025	0.512661			2.025	0.470961			6.1863	0.18557
	5.0137	0.33452							6.1937	0.11448			2.026	0.512819			2.026	0.471077			6.1937	0.18524
	5.0185	0.33127							6.2011	0.11426			2.027	0.512981			2.027	0.471138			6.2011	0.1849
	5.0234	0.32726							6.2085	0.11434			2.028	0.51314			2.028	0.47121			6.2085	0.18486
	5.0283	0.32234							6.216	0.1143			2.029	0.513277			2.029	0.471329			6.216	0.18471
	5.0331	0.31666							6.2235	0.11419			2.03	0.513412			2.03	0.471458			6.2235	0.18456
	5.038	0.31011							6.2309	0.11397			2.031	0.513592			2.031	0.47162			6.2309	0.18441
	5.0429	0.30261							6.2384	0.1137			2.032	0.513782			2.032	0.471778			6.2384	0.1843
	5.0478	0.29451							6.2459	0.1134			2.033	0.514003			2.033	0.471925			6.2459	0.18417
	5.0528	0.28639							6.2535	0.1132			2.034	0.514229			2.034	0.47208			6.2535	0.18407
	5.0577	0.27935							6.261	0.11295			2.035	0.514415			2.035	0.472173			6.261	0.18393
	5.0626	0.275							6.2686	0.11277			2.036	0.514599			2.036	0.472247			6.2686	0.18378
	5.0676	0.27431							6.2762	0.11266			2.037	0.514795			2.037	0.472352			6.2762	0.1837
	5.0725	0.27722							6.2838	0.11259			2.038	0.515001			2.038	0.472471			6.2838	0.18365
	5.0775	0.28246							6.2914	0.11256			2.039	0.515216			2.039	0.4726			6.2914	0.18359
	5.0825	0.2884							6.2991	0.11265			2.04	0.515449			2.04	0.472768			6.2991	0.18359
	5.0875	0.29368							6.3067	0.11283			2.041	0.5157			2.041	0.472949			6.3067	0.18357
	5.0925	0.29749							6.3144	0.11314			2.042	0.515941			2.042	0.473103			6.3144	0.1836
	5.0975	0.29984							6.3221	0.11347			2.043	0.516176			2.043	0.47325			6.3221	0.18372
	5.1025	0.30096							6.3298	0.11388			2.044	0.516413			2.044	0.473387			6.3298	0.18396
	5.1075	0.30128							6.3376	0.1144			2.045	0.516657			2.045	0.473521			6.3376	0.18438
	5.1126	0.30084							6.3453	0.11515			2.046	0.516883			2.046	0.473628			6.3453	0.18499
	5.1176	0.2999							6.3531	0.11567			2.047	0.51709			2.047	0.473725			6.3531	0.18546
	5.1227	0.29856							6.3609	0.11615			2.048	0.517259			2.048	0.473811			6.3609	0.18606
	5.1277	0.29692							6.3687	0.11703			2.049	0.517443			2.049	0.473903			6.3687	0.18704
	5.1328	0.29501							6.3765	0.1178			2.05	0.517701			2.05	0.474052			6.3765	0.188
	5.1379	0.29277							6.3844	0.11838			2.051	0.517926			2.051	0.474183			6.3844	0.1889
	5.143	0.29045							6.3923	0.11903			2.052	0.518122			2.052	0.474321			6.3923	0.18991
	5.1481	0.28794							6.4002	0.11967			2.053	0.51832			2.053	0.474485			6.4002	0.19093
	5.1532	0.28495							6.4081	0.12045			2.054	0.518506			2.054	0.474615			6.4081	0.19209
	5.1583	0.28134							6.416	0.12137			2.055	0.518688			2.055	0.474716			6.416	0.19338
	5.1635	0.27753							6.424	0.1216			2.056	0.518887			2.056	0.474819			6.424	0.19408
	5.1686	0.27336							6.4319	0.12189			2.057	0.519096			2.057	0.474931			6.4319	0.19497
	5.1738	0.26893							6.4399	0.12254			2.058	0.519301			2.058	0.475049			6.4399	0.19617
	5.179	0.26423							6.4479	0.123			2.059	0.519505			2.059	0.475126			6.4479	0.19724
	5.1841	0.25925							6.456	0.12359			2.06	0.519712			2.06	0.475196			6.456	0.1984
	5.1893	0.25397							6.464	0.12408			2.061	0.51986			2.061	0.475259			6.464	0.19949
	5.1945	0.24853							6.4721	0.12461			2.062	0.519991			2.062	0.475331			6.4721	0.20059
	5.1997	0.243							6.4802	0.12515			2.063	0.520109			2.063	0.475398			6.4802	0.20171
	5.205	0.23741							6.4883	0.12568			2.064	0.520249			2.064	0.475472			6.4883	0.20283
	5.2102	0.23153							6.4964	0.1263			2.065	0.520396			2.065	0.475547			6.4964	0.20389
	5.2154	0.22583							6.5046	0.12655			2.066	0.520524			2.066	0.475602			6.5046	0.20469
	5.2207	0.21977							6.5127	0.12682			2.067	0.520628			2.067	0.475691			6.5127	0.2055
	5.2259	0.2139							6.5209	0.12768			2.068	0.520707			2.068	0.475837			6.5209	0.20659
	5.2312	0.20824							6.5291	0.12828			2.069	0.520804			2.069	0.475977			6.5291	0.20749
	5.2365	0.20268							6.5374	0.12872			2.07	0.520884			2.07	0.47604			6.5374	0.20828
	5.2418	0.19752							6.5456	0.12943			2.071	0.520968			2.071	0.476114			6.5456	0.20906
	5.2471	0.19292							6.5539	0.13009			2.072	0.521154			2.072	0.476245			6.5539	0.20976
	5.2524	0.18912							6.5622	0.13062			2.073	0.521346			2.073	0.476366			6.5622	0.21037
	5.2577	0.18609							6.5705	0.13119			2.074	0.521487			2.074	0.476433			6.5705	0.21101
	5.2631	0.18374							6.5789	0.13183			2.075	0.52162			2.075	0.476493			6.5789	0.21151
	5.2684	0.18211							6.5872	0.1321			2.076	0.521813			2.076	0.476566			6.5872	0.21172
	5.2738	0.18058							6.5956	0.1326			2.077	0.522029			2.077	0.476651			6.5956	0.21218
	5.2792	0.1792							6.604	0.13295			2.078	0.522197			2.078	0.476764			6.604	0.21248
	5.2845	0.17768							6.6124	0.13324			2.079	0.522364			2.079	0.47689			6.6124	0.21273
	5.2899	0.17599							6.6209	0.13353			2.08	0.522591			2.08	0.477034			6.6209	0.21295
	5.2953	0.17407							6.6293	0.13375			2.081	0.522852			2.081	0.477184			6.6293	0.21316
	5.3008	0.17156							6.6378	0.13412			2.082	0.523098			2.082	0.477322			6.6378	0.21347
	5.3062	0.16838							6.6463	0.13404			2.083	0.523346			2.083	0.477469			6.6463	0.21338
	5.3116	0.1647							6.6549	0.13362			2.084	0.523597			2.084	0.477607			6.6549	0.21313
	5.3171	0.16047							6.6634	0.13368			2.085	0.523838			2.085	0.477701			6.6634	0.21331
	5.3225	0.15593							6.672	0.13376			2.086	0.524051			2.086	0.477785			6.672	0.21343
	5.328	0.15079							6.6806	0.1337			2.087	0.52416			2.087	0.477894			6.6806	0.21342
	5.3335	0.14554							6.6892	0.13346			2.088	0.52428			2.088	0.478019			6.6892	0.21335
	5.339	0.13994							6.6978	0.13306			2.089	0.524463			2.089	0.478151			6.6978	0.21318
	5.3445	0.13411							6.7065	0.13296			2.09	0.524672			2.09	0.47829			6.7065	0.21323
	5.35	0.12783							6.7152	0.13283			2.091	0.524887			2.091	0.478436			6.7152	0.21319
	5.3555	0.12101							6.7239	0.13241			2.092	0.525089			2.092	0.478583			6.7239	0.21304
	5.361	0.11359							6.7326	0.13202			2.093	0.525234			2.093	0.47873			6.7326	0.21295
	5.3666	0.10659							6.7414	0.13167			2.094	0.525385			2.094	0.478861			6.7414	0.21282
	5.3722	0.09944							6.7502	0.13138			2.095	0.525611			2.095	0.478987			6.7502	0.21273
	5.3777	0.09223							6.759	0.131			2.096	0.525833			2.096	0.479105			6.759	0.21261
	5.3833	0.08466							6.7678	0.13053			2.097	0.526023			2.097	0.47922			6.7678	0.21252
	5.3889	0.07729							6.7766	0.13012			2.098	0.526227			2.098	0.47933			6.7766	0.21245
	5.3945	0.07004							6.7855	0.12968			2.099	0.526422			2.099	0.479457			6.7855	0.21241
	5.4001	0.06329							6.7944	0.12929			2.1	0.526538			2.1	0.479615			6.7944	0.21239
	5.4058	0.05688							6.8033	0.12858			2.101	0.526683			2.101	0.479794			6.8033	0.21213
	5.4114	0.05124							6.8123	0.12807			2.102	0.526803			2.102	0.479923			6.8123	0.21196
	5.4171	0.04621							6.8212	0.12783			2.103	0.526921			2.103	0.480056			6.8212	0.21196
	5.4227	0.04229							6.8302	0.12752			2.104	0.527066			2.104	0.480194			6.8302	0.2119
	5.4284	0.0386							6.8392	0.12702			2.105	0.527227			2.105	0.480331			6.8392	0.2116
	5.4341	0.03558							6.8483	0.12667			2.106	0.527416			2.106	0.480439			6.8483	0.21135
	5.4398	0.03331							6.8573	0.12658			2.107	0.527622			2.107	0.480555			6.8573	0.21133
	5.4455	0.03169							6.8664	0.12648			2.108	0.527887			2.108	0.480741			6.8664	0.21125
	5.4512	0.03026							6.8755	0.12583			2.109	0.52815			2.109	0.480944			6.8755	0.2107
	5.457	0.02932							6.8846	0.12534			2.11	0.528429			2.11	0.481175			6.8846	0.21027
	5.4627	0.02866							6.8938	0.12524			2.111	0.52871			2.111	0.481415			6.8938	0.2101
	5.4685	0.02839							6.903	0.12491			2.112	0.528982			2.112	0.481644			6.903	0.20983
	5.4743	0.0279							6.9122	0.12447			2.113	0.529265			2.113	0.481821			6.9122	0.20953
	5.4801	0.02763							6.9214	0.12386			2.114	0.529536			2.114	0.481995			6.9214	0.20904
	5.4859	0.0275							6.9307	0.12332			2.115	0.52979			2.115	0.48221			6.9307	0.2086
	5.4917	0.02762							6.9399	0.12273			2.116	0.530079			2.116	0.482431			6.9399	0.20816
	5.4975	0.0279							6.9492	0.12215			2.117	0.530359			2.117	0.482632			6.9492	0.20764
	5.5033	0.02855							6.9586	0.12169			2.118	0.530629			2.118	0.48284			6.9586	0.20723
	5.5092	0.0292							6.9679	0.12108			2.119	0.530922			2.119	0.48307			6.9679	0.20672
	5.515	0.03022							6.9773	0.12023			2.12	0.531227			2.12	0.483306			6.9773	0.20595
	5.5209	0.03125							6.9867	0.11979			2.121	0.531545			2.121	0.483535			6.9867	0.20542
	5.5268	0.03267							6.9961	0.11938			2.122	0.53185			2.122	0.483753			6.9961	0.20483
	5.5327	0.03435							7.0056	0.11893			2.123	0.532111			2.123	0.483971			7.0056	0.20419
	5.5386	0.03638							7.0151	0.11851			2.124	0.532378			2.124	0.484203			7.0151	0.20355
	5.5445	0.03836							7.0246	0.11816			2.125	0.532624			2.125	0.484381			7.0246	0.20303
	5.5505	0.04053							7.0341	0.11775			2.126	0.532846			2.126	0.484539			7.0341	0.20248
	5.5564	0.04275							7.0437	0.11751			2.127	0.533044			2.127	0.484729			7.0437	0.2021
	5.5624	0.04496							7.0532	0.11718			2.128	0.533258			2.128	0.484921			7.0532	0.20156
	5.5684	0.04708							7.0629	0.11657			2.129	0.533515			2.129	0.485051			7.0629	0.20083
	5.5743	0.04939							7.0725	0.11626			2.13	0.533794			2.13	0.485154			7.0725	0.20035
	5.5803	0.05164							7.0822	0.11594			2.131	0.534058			2.131	0.485254			7.0822	0.19988
	5.5864	0.05397							7.0918	0.11562			2.132	0.534297			2.132	0.485369			7.0918	0.19928
	5.5924	0.05591							7.1016	0.11532			2.133	0.534527			2.133	0.485495			7.1016	0.19871
	5.5984	0.0578							7.1113	0.115			2.134	0.534769			2.134	0.485628			7.1113	0.19818
	5.6045	0.05951							7.1211	0.11467			2.135	0.535004			2.135	0.485744			7.1211	0.19762
	5.6105	0.06119							7.1309	0.11434			2.136	0.535186			2.136	0.485818			7.1309	0.19694
	5.6166	0.06256							7.1407	0.11404			2.137	0.535368			2.137	0.485907			7.1407	0.19627
	5.6227	0.0638							7.1505	0.11381			2.138	0.535575			2.138	0.486019			7.1505	0.1956
	5.6288	0.06478							7.1604	0.11345			2.139	0.535801			2.139	0.48614			7.1604	0.19481
	5.6349	0.06586							7.1703	0.11314			2.14	0.536016			2.14	0.486285			7.1703	0.19412
	5.6411	0.06683							7.1802	0.11279			2.141	0.536241			2.141	0.486459			7.1802	0.19339
	5.6472	0.06795							7.1902	0.11242			2.142	0.536404			2.142	0.486607			7.1902	0.19264
	5.6534	0.06864							7.2002	0.11218			2.143	0.536536			2.143	0.486733			7.2002	0.19196
	5.6595	0.06952							7.2102	0.11193			2.144	0.536731			2.144	0.486847			7.2102	0.19128
	5.6657	0.07038							7.2202	0.1114			2.145	0.53698			2.145	0.48698			7.2202	0.19052
	5.6719	0.07133							7.2303	0.11088			2.146	0.537183			2.146	0.487137			7.2303	0.18974
	5.6781	0.07242							7.2404	0.11054			2.147	0.537345			2.147	0.487287			7.2404	0.18895
	5.6844	0.07343							7.2505	0.11017			2.148	0.537513			2.148	0.487401			7.2505	0.18814
	5.6906	0.07421							7.2607	0.10971			2.149	0.537712			2.149	0.487498			7.2607	0.18736
	5.6969	0.07524							7.2709	0.10916			2.15	0.537944			2.15	0.487648			7.2709	0.18662
	5.7031	0.07583							7.2811	0.10855			2.151	0.538158			2.151	0.487879			7.2811	0.18592
	5.7094	0.07655							7.2913	0.10775			2.152	0.538381			2.152	0.4881			7.2913	0.18515
	5.7157	0.07718							7.3016	0.1069			2.153	0.538639			2.153	0.488223			7.3016	0.1844
	5.722	0.0775							7.3119	0.10602			2.154	0.538871			2.154	0.488343			7.3119	0.18369
	5.7283	0.07767							7.3222	0.10507			2.155	0.538993			2.155	0.488407			7.3222	0.1829
	5.7347	0.07775							7.3326	0.1043			2.156	0.539113			2.156	0.48847			7.3326	0.18213
	5.741	0.07752							7.343	0.10368			2.157	0.539268			2.157	0.48859			7.343	0.18144
	5.7474	0.07719							7.3534	0.10299			2.158	0.539421			2.158	0.488715			7.3534	0.18071
	5.7538	0.07668							7.3638	0.10229			2.159	0.539522			2.159	0.48875			7.3638	0.17998
	5.7601	0.0761							7.3743	0.10164			2.16	0.539597			2.16	0.488755			7.3743	0.17928
	5.7666	0.07592							7.3848	0.10094			2.161	0.539595			2.161	0.488816			7.3848	0.17862
	5.773	0.07551							7.3953	0.10014			2.162	0.539588			2.162	0.488912			7.3953	0.17785
	5.7794	0.07468							7.4059	0.09927			2.163	0.539646			2.163	0.489004			7.4059	0.17705
	5.7859	0.07487							7.4165	0.09833			2.164	0.539724			2.164	0.489102			7.4165	0.17623
	5.7923	0.07513							7.4271	0.09732			2.165	0.539823			2.165	0.489195			7.4271	0.17547
	5.7988	0.07547							7.4378	0.09629			2.166	0.539956			2.166	0.489273			7.4378	0.1748
	5.8053	0.07577							7.4485	0.09531			2.167	0.540088			2.167	0.48936			7.4485	0.17425
	5.8118	0.07609							7.4592	0.09471			2.168	0.540239			2.168	0.489481			7.4592	0.17376
	5.8183	0.07636							7.4699	0.09452			2.169	0.540397			2.169	0.489618			7.4699	0.17319
	5.8249	0.07677							7.4807	0.09433			2.17	0.540555			2.17	0.489748			7.4807	0.17257
	5.8314	0.07659							7.4915	0.09406			2.171	0.540717			2.171	0.489886			7.4915	0.17202
	5.838	0.07627							7.5024	0.09372			2.172	0.540839			2.172	0.490066			7.5024	0.17146
	5.8446	0.07578							7.5132	0.09333			2.173	0.540955			2.173	0.490238			7.5132	0.17085
	5.8512	0.07543							7.5241	0.09295			2.174	0.541085			2.174	0.490378			7.5241	0.17023
	5.8578	0.07487							7.5351	0.09252			2.175	0.541205			2.175	0.490503			7.5351	0.16963
	5.8644	0.07457							7.546	0.09204			2.176	0.541307			2.176	0.490622			7.546	0.16902
	5.871	0.07431							7.557	0.09152			2.177	0.541413			2.177	0.490742			7.557	0.16838
	5.8777	0.07436							7.5681	0.091			2.178	0.541589			2.178	0.490855			7.5681	0.16776
	5.8844	0.07504							7.5791	0.09049			2.179	0.541778			2.179	0.490965			7.5791	0.16716
	5.8911	0.07564							7.5902	0.08999			2.18	0.541947			2.18	0.491106			7.5902	0.16654
	5.8978	0.07633							7.6014	0.08945			2.181	0.542095			2.181	0.491245			7.6014	0.16589
	5.9045	0.0776							7.6125	0.0889			2.182	0.542262			2.182	0.491342			7.6125	0.16516
	5.9112	0.07842							7.6237	0.08833			2.183	0.542436			2.183	0.491428			7.6237	0.16441
	5.918	0.07982							7.635	0.08782			2.184	0.54261			2.184	0.491509			7.635	0.1636
	5.9247	0.08128							7.6462	0.08724			2.185	0.542782			2.185	0.491557			7.6462	0.1628
	5.9315	0.0832							7.6575	0.08666			2.186	0.542972			2.186	0.49168			7.6575	0.16204
	5.9383	0.08538							7.6688	0.08607			2.187	0.543141			2.187	0.49187			7.6688	0.16129
	5.9451	0.08814							7.6802	0.08548			2.188	0.543305			2.188	0.492034			7.6802	0.16049
	5.9519	0.08983							7.6916	0.08486			2.189	0.543496			2.189	0.492195			7.6916	0.15968
	5.9588	0.09222							7.703	0.08426			2.19	0.543662			2.19	0.492361			7.703	0.15888
	5.9656	0.09456							7.7145	0.08365			2.191	0.543817			2.191	0.492523			7.7145	0.15815
	5.9725	0.09745							7.726	0.08305			2.192	0.544006			2.192	0.492691			7.726	0.15736
	5.9794	0.10023							7.7375	0.08243			2.193	0.544235			2.193	0.492809			7.7375	0.1565
	5.9863	0.10322							7.7491	0.08181			2.194	0.544453			2.194	0.492899			7.7491	0.15568
	5.9932	0.10665							7.7607	0.08114			2.195	0.544587			2.195	0.492914			7.7607	0.15487
	6.0002	0.11066							7.7723	0.08047			2.196	0.544696			2.196	0.49293			7.7723	0.154
	6.0071	0.11403							7.784	0.07979			2.197	0.544827			2.197	0.49297			7.784	0.15315
	6.0141	0.11789							7.7957	0.07906			2.198	0.544973			2.198	0.493002			7.7957	0.15227
	6.0211	0.12175							7.8074	0.07829			2.199	0.545165			2.199	0.493095			7.8074	0.1514
	6.0281	0.12524							7.8192	0.07753			2.2	0.545354			2.2	0.493218			7.8192	0.15052
	6.0351	0.12853							7.831	0.0767			2.201	0.54558			2.201	0.493425			7.831	0.14964
	6.0421	0.13244							7.8429	0.07587			2.202	0.545804			2.202	0.493625			7.8429	0.1488
	6.0492	0.13669							7.8548	0.07499			2.203	0.545973			2.203	0.493825			7.8548	0.14791
	6.0562	0.14263							7.8667	0.07416			2.204	0.546131			2.204	0.494014			7.8667	0.147
	6.0633	0.14724							7.8786	0.07331			2.205	0.546291			2.205	0.494133			7.8786	0.14616
	6.0704	0.15255							7.8906	0.07249			2.206	0.546463			2.206	0.494262			7.8906	0.14538
	6.0775	0.15885							7.9026	0.07166			2.207	0.546622			2.207	0.494428			7.9026	0.14458
	6.0847	0.16489							7.9147	0.07079			2.208	0.54678			2.208	0.494622			7.9147	0.14365
	6.0918	0.16989							7.9268	0.0699			2.209	0.546929			2.209	0.494792			7.9268	0.14265
	6.099	0.17554							7.939	0.069			2.21	0.547071			2.21	0.494918			7.939	0.14163
	6.1062	0.18082							7.9511	0.06805			2.211	0.547238			2.211	0.495083			7.9511	0.1406
	6.1134	0.18613							7.9633	0.06712			2.212	0.547447			2.212	0.495298			7.9633	0.13958
	6.1206	0.1906							7.9756	0.06616			2.213	0.547614			2.213	0.495464			7.9756	0.13845
	6.1278	0.19298							7.9879	0.06516			2.214	0.54772			2.214	0.495568			7.9879	0.13723
	6.1351	0.1951							8.0002	0.06414			2.215	0.54782			2.215	0.495646			8.0002	0.13604
	6.1423	0.1979							8.0126	0.06317			2.216	0.547926			2.216	0.495724			8.0126	0.13487
	6.1496	0.20102							8.025	0.06219			2.217	0.54804			2.217	0.495829			8.025	0.13361
	6.1569	0.20495							8.0374	0.06115			2.218	0.548158			2.218	0.495975			8.0374	0.13233
	6.1643	0.21043							8.0499	0.0601			2.219	0.548271			2.219	0.496098			8.0499	0.13103
	6.1716	0.21759							8.0624	0.05911			2.22	0.548482			2.22	0.496158			8.0624	0.12972
	6.1789	0.22603							8.075	0.05807			2.221	0.548692			2.221	0.496202			8.075	0.12841
	6.1863	0.23714							8.0876	0.05707			2.222	0.548779			2.222	0.496283			8.0876	0.12703
	6.1937	0.25101							8.1002	0.05606			2.223	0.548836			2.223	0.496374			8.1002	0.12555
	6.2011	0.26416							8.1129	0.05505			2.224	0.548959			2.224	0.496489			8.1129	0.12403
	6.2085	0.27723							8.1256	0.05406			2.225	0.54909			2.225	0.496592			8.1256	0.12248
	6.216	0.29146							8.1384	0.05307			2.226	0.549158			2.226	0.496693			8.1384	0.12086
	6.2235	0.30593							8.1512	0.05203			2.227	0.549193			2.227	0.496775			8.1512	0.11915
	6.2309	0.32139							8.164	0.05101			2.228	0.54931			2.228	0.496916			8.164	0.11741
	6.2384	0.33809							8.1769	0.04998			2.229	0.549467			2.229	0.497096			8.1769	0.1156
	6.2459	0.35625							8.1898	0.04903			2.23	0.549604			2.23	0.497268			8.1898	0.11371
	6.2535	0.37448							8.2027	0.04802			2.231	0.549728			2.231	0.497434			8.2027	0.1118
	6.261	0.39143							8.2157	0.047			2.232	0.549837			2.232	0.497557			8.2157	0.10988
	6.2686	0.40607							8.2288	0.04596			2.233	0.54992			2.233	0.497641			8.2288	0.10795
	6.2762	0.41559							8.2419	0.04499			2.234	0.550011			2.234	0.497726			8.2419	0.10603
	6.2838	0.41514							8.255	0.04405			2.235	0.550146			2.235	0.497848			8.255	0.10411
	6.2914	0.40228							8.2682	0.0432			2.236	0.550284			2.236	0.497972			8.2682	0.10224
	6.2991	0.38422							8.2814	0.0423			2.237	0.550417			2.237	0.498029			8.2814	0.10033
	6.3067	0.36819							8.2946	0.04147			2.238	0.550529			2.238	0.49808			8.2946	0.09838
	6.3144	0.35578							8.3079	0.04071			2.239	0.550586			2.239	0.498173			8.3079	0.09639
	6.3221	0.34539							8.3212	0.03992			2.24	0.550653			2.24	0.498271			8.3212	0.0944
	6.3298	0.33661							8.3346	0.03909			2.241	0.550715			2.241	0.498395			8.3346	0.09241
	6.3376	0.32893							8.348	0.03834			2.242	0.550772			2.242	0.49853			8.348	0.09044
	6.3453	0.32329							8.3615	0.03759			2.243	0.550905			2.243	0.498672			8.3615	0.08849
	6.3531	0.31623							8.375	0.0369			2.244	0.551046			2.244	0.498803			8.375	0.08655
	6.3609	0.30881							8.3886	0.03618			2.245	0.551129			2.245	0.498895			8.3886	0.08455
	6.3687	0.30385							8.4022	0.0355			2.246	0.551197			2.246	0.49898			8.4022	0.08257
	6.3765	0.299							8.4158	0.03482			2.247	0.551344			2.247	0.499083			8.4158	0.08065
	6.3844	0.2928							8.4295	0.03416			2.248	0.551518			2.248	0.499206			8.4295	0.07884
	6.3923	0.28781							8.4432	0.03354			2.249	0.551661			2.249	0.499379			8.4432	0.07701
	6.4002	0.28281							8.457	0.03294			2.25	0.551803			2.25	0.499568			8.457	0.07524
	6.4081	0.2786							8.4708	0.03231			2.251	0.551937			2.251	0.499664			8.4708	0.07344
	6.416	0.27604							8.4847	0.03175			2.252	0.552086			2.252	0.49973			8.4847	0.07171
	6.424	0.27038							8.4986	0.03116			2.253	0.552264			2.253	0.499858			8.4986	0.07007
	6.4319	0.26405							8.5125	0.03057			2.254	0.552434			2.254	0.500021			8.5125	0.06853
	6.4399	0.26002							8.5265	0.02994			2.255	0.552541			2.255	0.500101			8.5265	0.06696
	6.4479	0.2552							8.5406	0.02937			2.256	0.552641			2.256	0.500144			8.5406	0.06546
	6.456	0.25113							8.5547	0.02879			2.257	0.552654			2.257	0.500185			8.5547	0.064
	6.464	0.24669							8.5688	0.02824			2.258	0.552602			2.258	0.500235			8.5688	0.06266
	6.4721	0.24301							8.583	0.02768			2.259	0.552601			2.259	0.50033			8.583	0.0614
	6.4802	0.2396							8.5972	0.02722			2.26	0.55266			2.26	0.500458			8.5972	0.06022
	6.4883	0.23636							8.6115	0.02675			2.261	0.552687			2.261	0.500518			8.6115	0.05907
	6.4964	0.23375							8.6258	0.02638			2.262	0.552648			2.262	0.500489			8.6258	0.058
	6.5046	0.22982							8.6402	0.02603			2.263	0.552605			2.263	0.500475			8.6402	0.05708
	6.5127	0.2255							8.6546	0.0257			2.264	0.552572			2.264	0.500513			8.6546	0.05628
	6.5209	0.22319							8.6691	0.02541			2.265	0.552584			2.265	0.500588			8.6691	0.05559
	6.5291	0.22051							8.6836	0.02516			2.266	0.552651			2.266	0.500697			8.6836	0.05506
	6.5374	0.21736							8.6982	0.02497			2.267	0.552718			2.267	0.500801			8.6982	0.0547
	6.5456	0.21488							8.7128	0.02492			2.268	0.552815			2.268	0.50088			8.7128	0.05449
	6.5539	0.21235							8.7275	0.02487			2.269	0.552904			2.269	0.500956			8.7275	0.05441
	6.5622	0.20954							8.7422	0.02489			2.27	0.552987			2.27	0.501105			8.7422	0.05463
	6.5705	0.20715							8.757	0.02498			2.271	0.553071			2.271	0.501244			8.757	0.05503
	6.5789	0.20496							8.7718	0.02526			2.272	0.553191			2.272	0.501309			8.7718	0.05564
	6.5872	0.20178							8.7867	0.02564			2.273	0.553301			2.273	0.501354			8.7867	0.05647
	6.5956	0.19955							8.8016	0.02622			2.274	0.553364			2.274	0.501348			8.8016	0.05762
	6.604	0.19718							8.8166	0.02699			2.275	0.553418			2.275	0.501353			8.8166	0.05897
	6.6124	0.19461							8.8316	0.02802			2.276	0.5535			2.276	0.501496			8.8316	0.0606
	6.6209	0.19283							8.8466	0.02922			2.277	0.553586			2.277	0.501645			8.8466	0.0625
	6.6293	0.19099							8.8618	0.03062			2.278	0.553534			2.278	0.501674			8.8618	0.0647
	6.6378	0.19015							8.8769	0.0323			2.279	0.553454			2.279	0.501686			8.8769	0.06705
	6.6463	0.18847							8.8922	0.03426			2.28	0.55337			2.28	0.50174			8.8922	0.06963
	6.6549	0.18564							8.9074	0.03639			2.281	0.553291			2.281	0.501814			8.9074	0.07235
	6.6634	0.18386							8.9228	0.03875			2.282	0.553262			2.282	0.501782			8.9228	0.07525
	6.672	0.18282							8.9382	0.04127			2.283	0.553233			2.283	0.501723			8.9382	0.07838
	6.6806	0.18184							8.9536	0.04392			2.284	0.55318			2.284	0.5017			8.9536	0.08165
	6.6892	0.18079							8.9691	0.04661			2.285	0.553149			2.285	0.501691			8.9691	0.08501
	6.6978	0.17908							8.9846	0.04927			2.286	0.553046			2.286	0.501632			8.9846	0.08861
	6.7065	0.17796							9.0002	0.05166			2.287	0.552894			2.287	0.501546			9.0002	0.09238
	6.7152	0.1772							9.0159	0.05368			2.288	0.552731			2.288	0.501472			9.0159	0.09623
	6.7239	0.17612							9.0316	0.05518			2.289	0.552567			2.289	0.501412			9.0316	0.10015
	6.7326	0.17468							9.0474	0.05593			2.29	0.552442			2.29	0.501317			9.0474	0.10416
	6.7414	0.17341							9.0632	0.05591			2.291	0.552324			2.291	0.501193			9.0632	0.10814
	6.7502	0.17227							9.079	0.05526			2.292	0.552295			2.292	0.501191			9.079	0.11206
	6.759	0.17141							9.095	0.05407			2.293	0.552346			2.293	0.5013			9.095	0.1158
	6.7678	0.17047							9.111	0.05266			2.294	0.552374			2.294	0.501408			9.111	0.11931
	6.7766	0.1699							9.127	0.05134			2.295	0.552395			2.295	0.501501			9.127	0.12242
	6.7855	0.1691							9.1431	0.05017			2.296	0.552413			2.296	0.501621			9.1431	0.12495
	6.7944	0.16864							9.1593	0.04907			2.297	0.55243			2.297	0.501789			9.1593	0.12688
	6.8033	0.16766							9.1755	0.04813			2.298	0.552474			2.298	0.501919			9.1755	0.12824
	6.8123	0.16658							9.1917	0.04737			2.299	0.552539			2.299	0.501973			9.1917	0.12919
	6.8212	0.16595							9.2081	0.04678			2.3	0.552573			2.3	0.502028			9.2081	0.13012
	6.8302	0.16569							9.2244	0.04636			2.301	0.552546			2.301	0.50209			9.2244	0.13141
	6.8392	0.16512							9.2409	0.04613			2.302	0.552487			2.302	0.502136			9.2409	0.13329
	6.8483	0.16449							9.2574	0.0461			2.303	0.552371			2.303	0.502151			9.2574	0.1357
	6.8573	0.1645							9.2739	0.04624			2.304	0.55226			2.304	0.502179			9.2739	0.13843
	6.8664	0.1649							9.2906	0.04642			2.305	0.552183			2.305	0.502241			9.2906	0.14117
	6.8755	0.1645							9.3072	0.04675			2.306	0.552093			2.306	0.502279			9.3072	0.14345
	6.8846	0.16383							9.324	0.04718			2.307	0.55192			2.307	0.502243			9.324	0.1449
	6.8938	0.16366							9.3408	0.04774			2.308	0.551734			2.308	0.502214			9.3408	0.14544
	6.903	0.16374							9.3576	0.04836			2.309	0.551492			2.309	0.50225			9.3576	0.14495
	6.9122	0.16399							9.3746	0.04908			2.31	0.55127			2.31	0.502287			9.3746	0.14358
	6.9214	0.16403							9.3915	0.04991			2.311	0.551154			2.311	0.502309			9.3915	0.14162
	6.9307	0.16414							9.4086	0.05083			2.312	0.551018			2.312	0.502319			9.4086	0.13943
	6.9399	0.16452							9.4257	0.0517			2.313	0.550886			2.313	0.502249			9.4257	0.13741
	6.9492	0.16478							9.4429	0.05268			2.314	0.550776			2.314	0.502177			9.4429	0.13576
	6.9586	0.16533							9.4601	0.05366			2.315	0.550821			2.315	0.502196			9.4601	0.13477
	6.9679	0.16624							9.4774	0.05453			2.316	0.550876			2.316	0.50222			9.4774	0.13457
	6.9773	0.16641							9.4948	0.05531			2.317	0.550991			2.317	0.502166			9.4948	0.1352
	6.9867	0.1665							9.5122	0.05601			2.318	0.5511			2.318	0.502096			9.5122	0.13669
	6.9961	0.1667							9.5297	0.05652			2.319	0.551262			2.319	0.502176			9.5297	0.13888
	7.0056	0.16615							9.5472	0.05681			2.32	0.551437			2.32	0.502272			9.5472	0.14173
	7.0151	0.16406							9.5648	0.0568			2.321	0.551598			2.321	0.502481			9.5648	0.14511
	7.0246	0.15946							9.5825	0.05659			2.322	0.551755			2.322	0.502716			9.5825	0.14874
	7.0341	0.15164							9.6003	0.05608			2.323	0.552001			2.323	0.502875			9.6003	0.15261
	7.0437	0.14343							9.6181	0.05538			2.324	0.552286			2.324	0.503036			9.6181	0.1567
	7.0532	0.13666							9.6359	0.05446			2.325	0.552586			2.325	0.503203			9.6359	0.1609
	7.0629	0.13157							9.6539	0.05345			2.326	0.552883			2.326	0.503367			9.6539	0.16533
	7.0725	0.12847							9.6719	0.05248			2.327	0.553172			2.327	0.503572			9.6719	0.1698
	7.0822	0.12525							9.69	0.0516			2.328	0.55347			2.328	0.503784			9.69	0.17387
	7.0918	0.12198							9.7081	0.05072			2.329	0.553773			2.329	0.503956			9.7081	0.177
	7.1016	0.11873							9.7263	0.04996			2.33	0.554054			2.33	0.504123			9.7263	0.17872
	7.1113	0.11589							9.7446	0.04934			2.331	0.554345			2.331	0.504277			9.7446	0.17904
	7.1211	0.11332							9.763	0.04879			2.332	0.554671			2.332	0.504392			9.763	0.17816
	7.1309	0.11096							9.7814	0.04816			2.333	0.555048			2.333	0.504489			9.7814	0.17631
	7.1407	0.1088							9.7999	0.04757			2.334	0.55544			2.334	0.504602			9.7999	0.17368
	7.1505	0.10715							9.8184	0.04697			2.335	0.555876			2.335	0.504768			9.8184	0.17039
	7.1604	0.10545							9.8371	0.04643			2.336	0.556338			2.336	0.504974			9.8371	0.16651
	7.1703	0.10414							9.8558	0.04589			2.337	0.556707			2.337	0.505178			9.8558	0.16224
	7.1802	0.10287							9.8745	0.04539			2.338	0.557024			2.338	0.505384			9.8745	0.15772
	7.1902	0.10163							9.8934	0.04492			2.339	0.557345			2.339	0.505555			9.8934	0.15304
	7.2002	0.10073							9.9123	0.04454			2.34	0.557674			2.34	0.505686			9.9123	0.14836
	7.2102	0.10014							9.9313	0.04418			2.341	0.557979			2.341	0.505859			9.9313	0.14372
	7.2202	0.09938							9.9504	0.04387			2.342	0.558247			2.342	0.506097			9.9504	0.13918
	7.2303	0.09885							9.9695	0.04353			2.343	0.558532			2.343	0.506352			9.9695	0.13478
	7.2404	0.09843							9.9887	0.04329			2.344	0.558869			2.344	0.506619			9.9887	0.13059
[truncated: 516 more rows]

## Sheet: Sheet3
Table S3 Spectra of the bland features used for spectral denominator.
	northern rim				northern rim				western rim				southern rim				southern rim				eastern rim				eastern rim				eastern rim				eastern rim
CRISM cube number	frt00012acc			CRISM cube number	frt00012acc				frt0000a0b7				frt00017d66				frt00017d66				hrl00010d87				frt0001253f				frt0001253f				frt0000ab54
pixel amount of ROI (Region of interest)	619			pixel amount of ROI (Region of interest)	72			pixel amount of ROI (Region of interest)	98			pixel amount of ROI (Region of interest)	235			pixel amount of ROI (Region of interest)	78			pixel amount of ROI (Region of interest)	262			pixel amount of ROI (Region of interest)	118			pixel amount of ROI (Region of interest)	217			pixel amount of ROI (Region of interest)	326
	wavelength	reflectance			wavelength	reflectance			wavelength	reflectance			wavelength	reflectance			wavelength	reflectance			wavelength	reflectance			wavelength	reflectance			wavelength	reflectance			wavelength	reflectance
	0.43613	0.049106			0.43613	0.04954			0.43613	0.05519			0.43613	0.055018			0.43613	0.053597			0.43613	0.064145			0.43613	0.051336			0.43613	0.053201			0.43613	0.047544
	0.44263	0.050044			0.44263	0.050763			0.44263	0.055188			0.44263	0.055513			0.44263	0.05378			0.44263	0.065671			0.44263	0.052451			0.44263	0.054242			0.44263	0.046978
	0.44914	0.052396			0.44914	0.053017			0.44914	0.057106			0.44914	0.056725			0.44914	0.054727			0.44914	0.068992			0.44914	0.054734			0.44914	0.05691			0.44914	0.048621
	0.45564	0.055724			0.45564	0.056778			0.45564	0.059573			0.45564	0.059505			0.45564	0.057991			0.45564	0.073569			0.45564	0.058492			0.45564	0.060446			0.45564	0.050668
	0.46215	0.057136			0.46215	0.057839			0.46215	0.060789			0.46215	0.060171			0.46215	0.058574			0.46215	0.075154			0.46215	0.059789			0.46215	0.062203			0.46215	0.05066
	0.46865	0.060233			0.46865	0.061255			0.46865	0.063182			0.46865	0.062385			0.46865	0.060917			0.46865	0.079646			0.46865	0.062983			0.46865	0.065169			0.46865	0.052831
	0.47516	0.062925			0.47516	0.063526			0.47516	0.065643			0.47516	0.064203			0.47516	0.062554			0.47516	0.082556			0.47516	0.065399			0.47516	0.068281			0.47516	0.054402
	0.48167	0.066629			0.48167	0.066996			0.48167	0.068324			0.48167	0.066625			0.48167	0.064987			0.48167	0.087151			0.48167	0.069109			0.48167	0.072325			0.48167	0.056589
	0.48817	0.068399			0.48817	0.069214			0.48817	0.06972			0.48817	0.067675			0.48817	0.066415			0.48817	0.08985			0.48817	0.071395			0.48817	0.074203			0.48817	0.057501
	0.49468	0.072755			0.49468	0.072863			0.49468	0.074377			0.49468	0.070249			0.49468	0.068578			0.49468	0.094925			0.49468	0.075326			0.49468	0.079107			0.49468	0.060032
	0.50119	0.075534			0.50119	0.076156			0.50119	0.076127			0.50119	0.0722			0.50119	0.07092			0.50119	0.099017			0.50119	0.078499			0.50119	0.081899			0.50119	0.061678
	0.5077	0.078835			0.5077	0.078767			0.5077	0.079609			0.5077	0.074713			0.5077	0.073039			0.5077	0.102587			0.5077	0.081514			0.5077	0.085678			0.5077	0.063548
	0.51421	0.081915			0.51421	0.081825			0.51421	0.081395			0.51421	0.076463			0.51421	0.074568			0.51421	0.106555			0.51421	0.084817			0.51421	0.089145			0.51421	0.064529
	0.52072	0.085493			0.52072	0.086007			0.52072	0.084557			0.52072	0.079244			0.52072	0.077889			0.52072	0.11164			0.52072	0.088832			0.52072	0.092996			0.52072	0.066935
	0.52723	0.088105			0.52723	0.087989			0.52723	0.087491			0.52723	0.080673			0.52723	0.079476			0.52723	0.113849			0.52723	0.091097			0.52723	0.095995			0.52723	0.06845
	0.53374	0.094104			0.53374	0.093988			0.53374	0.092722			0.53374	0.084804			0.53374	0.083546			0.53374	0.121639			0.53374	0.096927			0.53374	0.102533			0.53374	0.072409
	0.54025	0.097132			0.54025	0.097329			0.54025	0.094981			0.54025	0.087083			0.54025	0.085677			0.54025	0.126111			0.54025	0.100532			0.54025	0.10575			0.54025	0.074233
	0.54676	0.100796			0.54676	0.10074			0.54676	0.098631			0.54676	0.088739			0.54676	0.087398			0.54676	0.130189			0.54676	0.104285			0.54676	0.110033			0.54676	0.076075
	0.55327	0.106129			0.55327	0.106057			0.55327	0.1032			0.55327	0.093215			0.55327	0.091849			0.55327	0.13737			0.55327	0.109916			0.55327	0.115881			0.55327	0.079616
	0.55978	0.113166			0.55978	0.113043			0.55978	0.108974			0.55978	0.098791			0.55978	0.096949			0.55978	0.146543			0.55978	0.117043			0.55978	0.123586			0.55978	0.084006
	0.56629	0.123272			0.56629	0.123405			0.56629	0.113459			0.56629	0.106012			0.56629	0.104407			0.56629	0.157787			0.56629	0.126588			0.56629	0.133652			0.56629	0.088058
	0.57281	0.130276			0.57281	0.130657			0.57281	0.119044			0.57281	0.111109			0.57281	0.10953			0.57281	0.166679			0.57281	0.133823			0.57281	0.141171			0.57281	0.09344
	0.57932	0.13589			0.57932	0.136239			0.57932	0.124297			0.57932	0.115063			0.57932	0.113077			0.57932	0.175246			0.57932	0.139739			0.57932	0.14783			0.57932	0.096939
	0.58583	0.144352			0.58583	0.144672			0.58583	0.130307			0.58583	0.121353			0.58583	0.119226			0.58583	0.183571			0.58583	0.148655			0.58583	0.157367			0.58583	0.101974
	0.59235	0.148009			0.59235	0.148601			0.59235	0.134325			0.59235	0.123888			0.59235	0.122069			0.59235	0.192179			0.59235	0.152812			0.59235	0.161542			0.59235	0.105021
	0.59886	0.153604			0.59886	0.15422			0.59886	0.137305			0.59886	0.126536			0.59886	0.124063			0.59886	0.196204			0.59886	0.157516			0.59886	0.167049			0.59886	0.107855
	0.60538	0.154938			0.60538	0.155503			0.60538	0.13933			0.60538	0.12807			0.60538	0.125672			0.60538	0.199209			0.60538	0.159547			0.60538	0.169423			0.60538	0.109248
	0.61189	0.162142			0.61189	0.163137			0.61189	0.14428			0.61189	0.132911			0.61189	0.130059			0.61189	0.205898			0.61189	0.167425			0.61189	0.177675			0.61189	0.113922
	0.61841	0.16399			0.61841	0.165072			0.61841	0.147003			0.61841	0.134245			0.61841	0.131629			0.61841	0.209205			0.61841	0.169154			0.61841	0.179307			0.61841	0.115413
	0.62492	0.168007			0.62492	0.168988			0.62492	0.153892			0.62492	0.141752			0.62492	0.139275			0.62492	0.214271			0.62492	0.172996			0.62492	0.183883			0.62492	0.118911
	0.63144	0.169627			0.63144	0.17141			0.63144	0.15336			0.63144	0.140519			0.63144	0.13713			0.63144	0.212075			0.63144	0.173653			0.63144	0.184185			0.63144	0.11945
	0.70968	0.185867			0.70968	0.187131			0.70968	0.164397			0.70968	0.150427			0.70968	0.146817			0.70968	0.230701			0.70968	0.189298			0.70968	0.202686			0.70968	0.12973
	0.7162	0.185676			0.7162	0.187062			0.7162	0.165455			0.7162	0.150862			0.7162	0.147383			0.7162	0.230234			0.7162	0.188948			0.7162	0.202546			0.7162	0.130077
	0.72272	0.189392			0.72272	0.189993			0.72272	0.167727			0.72272	0.15183			0.72272	0.148432			0.72272	0.233767			0.72272	0.191724			0.72272	0.205892			0.72272	0.132278
	0.72925	0.190908			0.72925	0.191792			0.72925	0.168161			0.72925	0.154055			0.72925	0.15043			0.72925	0.236137			0.72925	0.193154			0.72925	0.207474			0.72925	0.133085
	0.73577	0.187271			0.73577	0.188216			0.73577	0.166029			0.73577	0.150995			0.73577	0.147933			0.73577	0.23163			0.73577	0.189824			0.73577	0.203937			0.73577	0.131038
	0.7423	0.185394			0.7423	0.18655			0.7423	0.164836			0.7423	0.149769			0.7423	0.147139			0.7423	0.229297			0.7423	0.188466			0.7423	0.201795			0.7423	0.130104
	0.74882	0.184735			0.74882	0.185844			0.74882	0.165086			0.74882	0.149501			0.74882	0.145787			0.74882	0.228038			0.74882	0.187734			0.74882	0.201287			0.74882	0.129876
	0.75535	0.185271			0.75535	0.186454			0.75535	0.165998			0.75535	0.149797			0.75535	0.146669			0.75535	0.228312			0.75535	0.187865			0.75535	0.201742			0.75535	0.130517
	0.76187	0.186456			0.76187	0.186944			0.76187	0.16614			0.76187	0.150075			0.76187	0.146206			0.76187	0.22938			0.76187	0.188452			0.76187	0.202198			0.76187	0.130887
	0.7684	0.186141			0.7684	0.186597			0.7684	0.165476			0.7684	0.148926			0.7684	0.14619			0.7684	0.228323			0.7684	0.187726			0.7684	0.201598			0.7684	0.130035
	0.77492	0.187406			0.77492	0.187832			0.77492	0.166451			0.77492	0.150293			0.77492	0.146781			0.77492	0.230055			0.77492	0.18905			0.77492	0.202954			0.77492	0.131071
	0.78145	0.185458			0.78145	0.18618			0.78145	0.164908			0.78145	0.148457			0.78145	0.144983			0.78145	0.228093			0.78145	0.187251			0.78145	0.200306			0.78145	0.130029
	0.78798	0.185042			0.78798	0.185417			0.78798	0.164862			0.78798	0.147781			0.78798	0.144621			0.78798	0.227347			0.78798	0.186727			0.78798	0.199786			0.78798	0.129816
	0.79451	0.183419			0.79451	0.183694			0.79451	0.163226			0.79451	0.146559			0.79451	0.143031			0.79451	0.225807			0.79451	0.185205			0.79451	0.197914			0.79451	0.128986
	0.80104	0.182897			0.80104	0.182869			0.80104	0.163339			0.80104	0.145374			0.80104	0.141599			0.80104	0.224647			0.80104	0.184561			0.80104	0.197228			0.80104	0.128636
	0.80756	0.182059			0.80756	0.182491			0.80756	0.163207			0.80756	0.144411			0.80756	0.141079			0.80756	0.224083			0.80756	0.184292			0.80756	0.196196			0.80756	0.127758
	0.81409	0.182991			0.81409	0.182908			0.81409	0.164014			0.81409	0.14445			0.81409	0.140516			0.81409	0.224639			0.81409	0.184065			0.81409	0.196597			0.81409	0.128385
	0.82062	0.183349			0.82062	0.182938			0.82062	0.163501			0.82062	0.144069			0.82062	0.140542			0.82062	0.224985			0.82062	0.184497			0.82062	0.196651			0.82062	0.12776
	0.82715	0.182019			0.82715	0.181544			0.82715	0.162768			0.82715	0.142417			0.82715	0.138838			0.82715	0.223065			0.82715	0.183111			0.82715	0.19502			0.82715	0.126808
	0.83368	0.181771			0.83368	0.18145			0.83368	0.162471			0.83368	0.141816			0.83368	0.138296			0.83368	0.22307			0.83368	0.183196			0.83368	0.194554			0.83368	0.126437
	0.84022	0.181448			0.84022	0.180868			0.84022	0.162407			0.84022	0.141111			0.84022	0.137184			0.84022	0.222743			0.84022	0.182375			0.84022	0.193847			0.84022	0.12649
	0.84675	0.180286			0.84675	0.179339			0.84675	0.160634			0.84675	0.139578			0.84675	0.135967			0.84675	0.221064			0.84675	0.18104			0.84675	0.192423			0.84675	0.124936
	0.85328	0.179179			0.85328	0.178443			0.85328	0.158867			0.85328	0.138101			0.85328	0.134189			0.85328	0.220278			0.85328	0.180696			0.85328	0.191052			0.85328	0.123715
	0.85981	0.176571			0.85981	0.176433			0.85981	0.159707			0.85981	0.135964			0.85981	0.132047			0.85981	0.217097			0.85981	0.178196			0.85981	0.188057			0.85981	0.123083
	0.86634	0.179791			0.86634	0.178077			0.86634	0.160453			0.86634	0.137071			0.86634	0.133735			0.86634	0.219378			0.86634	0.18024			0.86634	0.191449			0.86634	0.123832
	0.87288	0.177284			0.87288	0.175876			0.87288	0.158606			0.87288	0.134753			0.87288	0.131337			0.87288	0.217479			0.87288	0.17814			0.87288	0.188466			0.87288	0.122098
	0.87941	0.174827			0.87941	0.173206			0.87941	0.156114			0.87941	0.133476			0.87941	0.129884			0.87941	0.214151			0.87941	0.175902			0.87941	0.186102			0.87941	0.120223
	0.88595	0.174313			0.88595	0.173082			0.88595	0.15625			0.88595	0.132506			0.88595	0.128603			0.88595	0.214225			0.88595	0.176224			0.88595	0.185053			0.88595	0.120006
	0.89248	0.1755			0.89248	0.174129			0.89248	0.157943			0.89248	0.133142			0.89248	0.129717			0.89248	0.215159			0.89248	0.176766			0.89248	0.186287			0.89248	0.120789
	0.89902	0.173541			0.89902	0.171474			0.89902	0.155256			0.89902	0.131388			0.89902	0.127457			0.89902	0.212555			0.89902	0.174445			0.89902	0.184115			0.89902	0.119135
	0.90555	0.171368			0.90555	0.170202			0.90555	0.154046			0.90555	0.129977			0.90555	0.126347			0.90555	0.210436			0.90555	0.173044			0.90555	0.181837			0.90555	0.118064
	0.91209	0.170304			0.91209	0.168896			0.91209	0.153734			0.91209	0.12928			0.91209	0.125359			0.91209	0.208872			0.91209	0.172208			0.91209	0.180694			0.91209	0.117212
	0.91862	0.171437			0.91862	0.169706			0.91862	0.154144			0.91862	0.129972			0.91862	0.126329			0.91862	0.210588			0.91862	0.173161			0.91862	0.181735			0.91862	0.117903
	0.92516	0.169552			0.92516	0.168356			0.92516	0.152578			0.92516	0.128818			0.92516	0.124902			0.92516	0.208985			0.92516	0.172145			0.92516	0.1797			0.92516	0.11651
	0.9317	0.167807			0.9317	0.166172			0.9317	0.15168			0.9317	0.127677			0.9317	0.123408			0.9317	0.206162			0.9317	0.169921			0.9317	0.178166			0.9317	0.115677
	0.93824	0.166799			0.93824	0.165935			0.93824	0.151554			0.93824	0.127782			0.93824	0.123951			0.93824	0.205369			0.93824	0.169959			0.93824	0.17708			0.93824	0.115108
	0.94477	0.16692			0.94477	0.165819			0.94477	0.152177			0.94477	0.127803			0.94477	0.124203			0.94477	0.205726			0.94477	0.169859			0.94477	0.177072			0.94477	0.115067
	0.95131	0.16781			0.95131	0.166013			0.95131	0.152499			0.95131	0.12868			0.95131	0.124961			0.95131	0.206167			0.95131	0.17005			0.95131	0.178007			0.95131	0.11602
	0.95785	0.166626			0.95785	0.165336			0.95785	0.151506			0.95785	0.128008			0.95785	0.124093			0.95785	0.205805			0.95785	0.169834			0.95785	0.176739			0.95785	0.114844
	0.96439	0.166644			0.96439	0.165207			0.96439	0.151938			0.96439	0.127958			0.96439	0.124075			0.96439	0.205531			0.96439	0.169703			0.96439	0.177128			0.96439	0.115576
	0.97093	0.164636			0.97093	0.163587			0.97093	0.15014			0.97093	0.127233			0.97093	0.122861			0.97093	0.204191			0.97093	0.167941			0.97093	0.1751			0.97093	0.1147
	0.97747	0.164085			0.97747	0.16297			0.97747	0.149351			0.97747	0.126887			0.97747	0.123196			0.97747	0.203487			0.97747	0.167107			0.97747	0.174536			0.97747	0.114099
	0.98401	0.160816			0.98401	0.160364			0.98401	0.146776			0.98401	0.124995			0.98401	0.121611			0.98401	0.199239			0.98401	0.163875			0.98401	0.171564			0.98401	0.112168
	0.99055	0.160753			0.99055	0.160165			0.99055	0.146234			0.99055	0.125745			0.99055	0.12258			0.99055	0.19964			0.99055	0.164265			0.99055	0.171497			0.99055	0.112984
	0.9971	0.16147			0.9971	0.160649			0.9971	0.148067			0.9971	0.126849			0.9971	0.123227			0.9971	0.200033			0.9971	0.164409			0.9971	0.172532			0.9971	0.114167
	1.00364	0.160904			1.00364	0.160392			1.00364	0.147229			1.00364	0.12824			1.00364	0.125002			1.00364	0.201386			1.00364	0.164952			1.00364	0.173178			1.00364	0.114466
	1.01018	0.158753			1.01018	0.159241			1.01018	0.147331			1.01018	0.128464			1.01018	0.125713			1.01018	0.200286			1.01018	0.163709			1.01018	0.170623			1.01018	0.114461
	1.0472	0.161567			1.0472	0.16049			1.0472	0.142126			1.0472	0.128178			1.0472	0.125462			1.0472	0.195578			1.0472	0.163769			1.0472	0.174262			1.0472	0.11104
	1.05375	0.160972			1.05375	0.160689			1.05375	0.142868			1.05375	0.129515			1.05375	0.125856			1.05375	0.19631			1.05375	0.163727			1.05375	0.173951			1.05375	0.111801
	1.0603	0.16023			1.0603	0.160103			1.0603	0.142666			1.0603	0.126894			1.0603	0.124886			1.0603	0.194757			1.0603	0.16241			1.0603	0.173496			1.0603	0.111447
	1.06685	0.160202			1.06685	0.159881			1.06685	0.143195			1.06685	0.128717			1.06685	0.125375			1.06685	0.194985			1.06685	0.16217			1.06685	0.173504			1.06685	0.111816
	1.07341	0.159813			1.07341	0.159463			1.07341	0.14399			1.07341	0.128636			1.07341	0.126953			1.07341	0.1955			1.07341	0.161865			1.07341	0.172996			1.07341	0.112771
	1.07996	0.15887			1.07996	0.158692			1.07996	0.143105			1.07996	0.127585			1.07996	0.125992			1.07996	0.195154			1.07996	0.161143			1.07996	0.172314			1.07996	0.112661
	1.08651	0.159563			1.08651	0.159108			1.08651	0.143308			1.08651	0.128635			1.08651	0.12788			1.08651	0.195677			1.08651	0.161539			1.08651	0.173303			1.08651	0.113128
	1.09307	0.159551			1.09307	0.159532			1.09307	0.143721			1.09307	0.130082			1.09307	0.128013			1.09307	0.195761			1.09307	0.160051			1.09307	0.172012			1.09307	0.113705
	1.09962	0.160949			1.09962	0.161011			1.09962	0.144254			1.09962	0.130854			1.09962	0.128835			1.09962	0.197244			1.09962	0.162861			1.09962	0.175277			1.09962	0.114099
	1.10617	0.16133			1.10617	0.161928			1.10617	0.145072			1.10617	0.131428			1.10617	0.129338			1.10617	0.19814			1.10617	0.165975			1.10617	0.175084			1.10617	0.114929
	1.11273	0.161177			1.11273	0.161811			1.11273	0.145332			1.11273	0.13257			1.11273	0.129543			1.11273	0.198374			1.11273	0.16409			1.11273	0.175569			1.11273	0.115459
	1.11928	0.161166			1.11928	0.16256			1.11928	0.145829			1.11928	0.136985			1.11928	0.130744			1.11928	0.199585			1.11928	0.169165			1.11928	0.175499			1.11928	0.116233
	1.12584	0.161564			1.12584	0.162654			1.12584	0.145814			1.12584	0.134108			1.12584	0.131264			1.12584	0.199047			1.12584	0.16468			1.12584	0.17644			1.12584	0.116631
	1.13239	0.161855			1.13239	0.162826			1.13239	0.145937			1.13239	0.134742			1.13239	0.131831			1.13239	0.198753			1.13239	0.16417			1.13239	0.176621			1.13239	0.116685
	1.13895	0.161422			1.13895	0.162398			1.13895	0.145278			1.13895	0.133567			1.13895	0.131326			1.13895	0.197663			1.13895	0.163263			1.13895	0.17642			1.13895	0.116181
	1.14551	0.16151			1.14551	0.162619			1.14551	0.145131			1.14551	0.134704			1.14551	0.13068			1.14551	0.198614			1.14551	0.163493			1.14551	0.176812			1.14551	0.116356
	1.15206	0.161951			1.15206	0.163154			1.15206	0.145626			1.15206	0.133986			1.15206	0.132625			1.15206	0.198951			1.15206	0.164208			1.15206	0.177209			1.15206	0.116528
	1.15862	0.161728			1.15862	0.162566			1.15862	0.145529			1.15862	0.134568			1.15862	0.131973			1.15862	0.19868			1.15862	0.163332			1.15862	0.177686			1.15862	0.11658
	1.16518	0.161536			1.16518	0.162573			1.16518	0.145422			1.16518	0.134072			1.16518	0.131286			1.16518	0.198174			1.16518	0.163419			1.16518	0.177277			1.16518	0.116545
	1.17173	0.161511			1.17173	0.161257			1.17173	0.145484			1.17173	0.13464			1.17173	0.131691			1.17173	0.198214			1.17173	0.163267			1.17173	0.177985			1.17173	0.116719
	1.17829	0.158897			1.17829	0.160863			1.17829	0.145299			1.17829	0.133031			1.17829	0.132925			1.17829	0.19714			1.17829	0.165222			1.17829	0.173967			1.17829	0.116828
	1.18485	0.15897			1.18485	0.170108			1.18485	0.146135			1.18485	0.13437			1.18485	0.133038			1.18485	0.198			1.18485	0.166302			1.18485	0.176802			1.18485	0.117799
	1.19141	0.163357			1.19141	0.175245			1.19141	0.146902			1.19141	0.135097			1.19141	0.131632			1.19141	0.198671			1.19141	0.155909			1.19141	0.178236			1.19141	0.118135
	1.19797	0.158655			1.19797	0.162851			1.19797	0.146201			1.19797	0.134523			1.19797	0.132367			1.19797	0.196508			1.19797	0.162207			1.19797	0.17406			1.19797	0.117101
	1.20453	0.158458			1.20453	0.162094			1.20453	0.14552			1.20453	0.133734			1.20453	0.131119			1.20453	0.195908			1.20453	0.160243			1.20453	0.173902			1.20453	0.116968
	1.21109	0.159014			1.21109	0.160096			1.21109	0.145471			1.21109	0.133869			1.21109	0.131474			1.21109	0.196807			1.21109	0.160743			1.21109	0.17432			1.21109	0.116975
	1.21765	0.158191			1.21765	0.159207			1.21765	0.145524			1.21765	0.133275			1.21765	0.132085			1.21765	0.195666			1.21765	0.159961			1.21765	0.173484			1.21765	0.117259
	1.22421	0.158017			1.22421	0.159477			1.22421	0.145288			1.22421	0.134355			1.22421	0.131435			1.22421	0.194879			1.22421	0.159774			1.22421	0.1738			1.22421	0.11726
	1.23077	0.159348			1.23077	0.158992			1.23077	0.146623			1.23077	0.134744			1.23077	0.133496			1.23077	0.19612			1.23077	0.161026			1.23077	0.17553			1.23077	0.118423
	1.23733	0.159533			1.23733	0.160873			1.23733	0.14611			1.23733	0.134905			1.23733	0.132866			1.23733	0.1966			1.23733	0.161554			1.23733	0.1755			1.23733	0.118187
	1.24389	0.159904			1.24389	0.160986			1.24389	0.146243			1.24389	0.135702			1.24389	0.133056			1.24389	0.196942			1.24389	0.159115			1.24389	0.175612			1.24389	0.118034
	1.25045	0.160311			1.25045	0.161639			1.25045	0.146749			1.25045	0.135696			1.25045	0.134252			1.25045	0.197017			1.25045	0.162128			1.25045	0.176328			1.25045	0.118466
	1.25701	0.159874			1.25701	0.161092			1.25701	0.145629			1.25701	0.135389			1.25701	0.134302			1.25701	0.197087			1.25701	0.161521			1.25701	0.176158			1.25701	0.118097
	1.26357	0.160365			1.26357	0.161726			1.26357	0.146583			1.26357	0.137885			1.26357	0.134448			1.26357	0.197335			1.26357	0.162042			1.26357	0.176386			1.26357	0.12018
	1.27014	0.161818			1.27014	0.163173			1.27014	0.148302			1.27014	0.138733			1.27014	0.135849			1.27014	0.198083			1.27014	0.163461			1.27014	0.178224			1.27014	0.121723
	1.2767	0.161744			1.2767	0.162906			1.2767	0.147285			1.2767	0.137653			1.2767	0.135285			1.2767	0.198743			1.2767	0.163069			1.2767	0.178178			1.2767	0.120112
	1.28326	0.161529			1.28326	0.162938			1.28326	0.146556			1.28326	0.135995			1.28326	0.133873			1.28326	0.197646			1.28326	0.162824			1.28326	0.1778			1.28326	0.118922
	1.28983	0.161989			1.28983	0.163254			1.28983	0.146921			1.28983	0.13719			1.28983	0.134992			1.28983	0.198465			1.28983	0.163091			1.28983	0.178505			1.28983	0.119255
	1.29639	0.162186			1.29639	0.163632			1.29639	0.147429			1.29639	0.137746			1.29639	0.135173			1.29639	0.198976			1.29639	0.16322			1.29639	0.179198			1.29639	0.119749
	1.30295	0.162344			1.30295	0.163794			1.30295	0.147371			1.30295	0.137542			1.30295	0.135277			1.30295	0.198665			1.30295	0.16336			1.30295	0.179425			1.30295	0.120056
	1.30952	0.161581			1.30952	0.16287			1.30952	0.146788			1.30952	0.137559			1.30952	0.13479			1.30952	0.198472			1.30952	0.162242			1.30952	0.178204			1.30952	0.119452
	1.31608	0.16138			1.31608	0.162596			1.31608	0.14695			1.31608	0.138193			1.31608	0.135951			1.31608	0.198626			1.31608	0.161916			1.31608	0.177976			1.31608	0.120096
	1.32265	0.162733			1.32265	0.163902			1.32265	0.148413			1.32265	0.139285			1.32265	0.13672			1.32265	0.200121			1.32265	0.163399			1.32265	0.179298			1.32265	0.121452
	1.32921	0.162694			1.32921	0.163782			1.32921	0.147725			1.32921	0.138517			1.32921	0.135048			1.32921	0.199145			1.32921	0.163032			1.32921	0.179415			1.32921	0.120585
	1.33578	0.163117			1.33578	0.164247			1.33578	0.147624			1.33578	0.138868			1.33578	0.135317			1.33578	0.199558			1.33578	0.163646			1.33578	0.179367			1.33578	0.120479
	1.34234	0.163243			1.34234	0.164258			1.34234	0.148527			1.34234	0.139192			1.34234	0.136731			1.34234	0.199539			1.34234	0.163793			1.34234	0.179961			1.34234	0.121375
	1.34891	0.16366			1.34891	0.164897			1.34891	0.148986			1.34891	0.140907			1.34891	0.137322			1.34891	0.200878			1.34891	0.164299			1.34891	0.180379			1.34891	0.122722
	1.35548	0.164081			1.35548	0.165117			1.35548	0.150942			1.35548	0.142768			1.35548	0.139369			1.35548	0.201552			1.35548	0.164454			1.35548	0.180825			1.35548	0.124171
	1.36205	0.164141			1.36205	0.165287			1.36205	0.15161			1.36205	0.14381			1.36205	0.139752			1.36205	0.201066			1.36205	0.164154			1.36205	0.180754			1.36205	0.124602
	1.36861	0.163234			1.36861	0.164387			1.36861	0.150557			1.36861	0.142699			1.36861	0.139157			1.36861	0.199528			1.36861	0.163576			1.36861	0.179824			1.36861	0.124027
	1.37518	0.163625			1.37518	0.164956			1.37518	0.150878			1.37518	0.143486			1.37518	0.141145			1.37518	0.200468			1.37518	0.164016			1.37518	0.180125			1.37518	0.125015
	1.38175	0.163567			1.38175	0.16473			1.38175	0.152256			1.38175	0.144675			1.38175	0.140767			1.38175	0.201099			1.38175	0.16401			1.38175	0.180005			1.38175	0.125891
	1.38832	0.162733			1.38832	0.163338			1.38832	0.150434			1.38832	0.141963			1.38832	0.140571			1.38832	0.199568			1.38832	0.163543			1.38832	0.179621			1.38832	0.124774
	1.39489	0.164067			1.39489	0.164672			1.39489	0.150833			1.39489	0.142958			1.39489	0.140419			1.39489	0.200341			1.39489	0.163897			1.39489	0.180149			1.39489	0.124971
	1.40145	0.16402			1.40145	0.164788			1.40145	0.151413			1.40145	0.143623			1.40145	0.139504			1.40145	0.200973			1.40145	0.163982			1.40145	0.180389			1.40145	0.125811
	1.40802	0.16348			1.40802	0.165264			1.40802	0.152246			1.40802	0.144745			1.40802	0.139863			1.40802	0.200931			1.40802	0.164211			1.40802	0.179989			1.40802	0.126659
	1.41459	0.164375			1.41459	0.165741			1.41459	0.151555			1.41459	0.144377			1.41459	0.140129			1.41459	0.201355			1.41459	0.16486			1.41459	0.18097			1.41459	0.125891
	1.42116	0.164744			1.42116	0.166118			1.42116	0.151783			1.42116	0.144385			1.42116	0.139582			1.42116	0.201476			1.42116	0.165649			1.42116	0.181227			1.42116	0.12632
	1.42773	0.163883			1.42773	0.165308			1.42773	0.151394			1.42773	0.143369			1.42773	0.140069			1.42773	0.200645			1.42773	0.164176			1.42773	0.179994			1.42773	0.125761
	1.43431	0.163028			1.43431	0.164746			1.43431	0.151039			1.43431	0.143193			1.43431	0.139362			1.43431	0.199823			1.43431	0.163662			1.43431	0.178757			1.43431	0.125544
	1.44088	0.160141			1.44088	0.160989			1.44088	0.151086			1.44088	0.144815			1.44088	0.140167			1.44088	0.197374			1.44088	0.160457			1.44088	0.1759			1.44088	0.126457
	1.44745	0.161688			1.44745	0.162785			1.44745	0.151793			1.44745	0.145307			1.44745	0.144473			1.44745	0.197892			1.44745	0.162294			1.44745	0.177054			1.44745	0.127194
	1.45402	0.163038			1.45402	0.164575			1.45402	0.150876			1.45402	0.143587			1.45402	0.139053			1.45402	0.198902			1.45402	0.163789			1.45402	0.178721			1.45402	0.126384
	1.46059	0.16415			1.46059	0.165671			1.46059	0.150931			1.46059	0.142977			1.46059	0.138131			1.46059	0.200046			1.46059	0.164571			1.46059	0.180081			1.46059	0.125939
	1.46716	0.164277			1.46716	0.165881			1.46716	0.151224			1.46716	0.143564			1.46716	0.139424			1.46716	0.199993			1.46716	0.164838			1.46716	0.180165			1.46716	0.126552
	1.47374	0.164555			1.47374	0.165259			1.47374	0.150078			1.47374	0.142642			1.47374	0.137432			1.47374	0.200159			1.47374	0.164602			1.47374	0.180379			1.47374	0.125854
	1.48031	0.164725			1.48031	0.164982			1.48031	0.150093			1.48031	0.14216			1.48031	0.138518			1.48031	0.199974			1.48031	0.164512			1.48031	0.180467			1.48031	0.126003
	1.48688	0.163966			1.48688	0.166924			1.48688	0.148337			1.48688	0.141288			1.48688	0.136465			1.48688	0.198796			1.48688	0.163312			1.48688	0.180229			1.48688	0.124734
	1.49346	0.164845			1.49346	0.166117			1.49346	0.149795			1.49346	0.142524			1.49346	0.139735			1.49346	0.199853			1.49346	0.16532			1.49346	0.180248			1.49346	0.125851
	1.50003	0.163636			1.50003	0.165752			1.50003	0.149291			1.50003	0.141821			1.50003	0.137082			1.50003	0.198453			1.50003	0.164042			1.50003	0.179306			1.50003	0.12569
	1.50661	0.163547			1.50661	0.16518			1.50661	0.14754			1.50661	0.140582			1.50661	0.135858			1.50661	0.198199			1.50661	0.163989			1.50661	0.178846			1.50661	0.124398
	1.51318	0.16483			1.51318	0.166561			1.51318	0.148974			1.51318	0.141666			1.51318	0.136748			1.51318	0.199319			1.51318	0.165509			1.51318	0.180952			1.51318	0.125708
	1.51976	0.164622			1.51976	0.166302			1.51976	0.148933			1.51976	0.140633			1.51976	0.137244			1.51976	0.199307			1.51976	0.164942			1.51976	0.181924			1.51976	0.125775
	1.52633	0.164062			1.52633	0.165702			1.52633	0.149221			1.52633	0.142116			1.52633	0.135987			1.52633	0.199005			1.52633	0.164381			1.52633	0.179679			1.52633	0.125947
	1.53291	0.16362			1.53291	0.164955			1.53291	0.148897			1.53291	0.141604			1.53291	0.136509			1.53291	0.198351			1.53291	0.163566			1.53291	0.179412			1.53291	0.125767
	1.53948	0.163936			1.53948	0.165454			1.53948	0.148601			1.53948	0.141116			1.53948	0.135653			1.53948	0.197908			1.53948	0.164298			1.53948	0.179661			1.53948	0.125579
	1.54606	0.165242			1.54606	0.166637			1.54606	0.149819			1.54606	0.142868			1.54606	0.136943			1.54606	0.199448			1.54606	0.165196			1.54606	0.180614			1.54606	0.126627
	1.55264	0.164924			1.55264	0.166769			1.55264	0.149513			1.55264	0.142016			1.55264	0.136975			1.55264	0.1991			1.55264	0.165512			1.55264	0.180191			1.55264	0.126375
	1.55921	0.165055			1.55921	0.166229			1.55921	0.14887			1.55921	0.141745			1.55921	0.135102			1.55921	0.198679			1.55921	0.165256			1.55921	0.179628			1.55921	0.126533
	1.56579	0.163285			1.56579	0.16529			1.56579	0.149753			1.56579	0.142364			1.56579	0.137844			1.56579	0.198762			1.56579	0.163715			1.56579	0.177823			1.56579	0.127173
	1.57237	0.16146			1.57237	0.162957			1.57237	0.148825			1.57237	0.141428			1.57237	0.136526			1.57237	0.196139			1.57237	0.161812			1.57237	0.175618			1.57237	0.12657
	1.57895	0.162514			1.57895	0.164161			1.57895	0.148155			1.57895	0.141469			1.57895	0.135298			1.57895	0.19694			1.57895	0.16273			1.57895	0.176585			1.57895	0.126578
	1.58552	0.163626			1.58552	0.165091			1.58552	0.149082			1.58552	0.142162			1.58552	0.136342			1.58552	0.19775			1.58552	0.16386			1.58552	0.177471			1.58552	0.126827
	1.5921	0.162918			1.5921	0.164241			1.5921	0.147633			1.5921	0.14095			1.5921	0.134118			1.5921	0.196721			1.5921	0.162991			1.5921	0.176964			1.5921	0.125795
	1.59868	0.162548			1.59868	0.163806			1.59868	0.147822			1.59868	0.141905			1.59868	0.135844			1.59868	0.196052			1.59868	0.162889			1.59868	0.17667			1.59868	0.126056
	1.60526	0.16181			1.60526	0.163595			1.60526	0.147711			1.60526	0.140821			1.60526	0.127226			1.60526	0.195393			1.60526	0.162149			1.60526	0.175627			1.60526	0.125714
	1.61184	0.161218			1.61184	0.162362			1.61184	0.148078			1.61184	0.141267			1.61184	0.131749			1.61184	0.194983			1.61184	0.160931			1.61184	0.174999			1.61184	0.12653
	1.61842	0.161482			1.61842	0.162772			1.61842	0.1485			1.61842	0.141402			1.61842	0.134819			1.61842	0.195971			1.61842	0.161436			1.61842	0.17508			1.61842	0.12649
	1.625	0.16319			1.625	0.164082			1.625	0.147977			1.625	0.141632			1.625	0.13334			1.625	0.196252			1.625	0.163117			1.625	0.176992			1.625	0.125743
	1.63158	0.163936			1.63158	0.165602			1.63158	0.149378			1.63158	0.141644			1.63158	0.135531			1.63158	0.196504			1.63158	0.164582			1.63158	0.177711			1.63158	0.126779
	1.63816	0.163502			1.63816	0.164514			1.63816	0.147804			1.63816	0.140694			1.63816	0.135179			1.63816	0.196845			1.63816	0.163076			1.63816	0.177044			1.63816	0.125239
	1.64474	0.164613			1.64474	0.164537			1.64474	0.148446			1.64474	0.142029			1.64474	0.134776			1.64474	0.197364			1.64474	0.16363			1.64474	0.177836			1.64474	0.125867
	1.65133	0.164463			1.65133	0.164			1.65133	0.149112			1.65133	0.142547			1.65133	0.132895			1.65133	0.196577			1.65133	0.161384			1.65133	0.178278			1.65133	0.125225
	1.65791	0.16338			1.65791	0.163444			1.65791	0.144748			1.65791	0.13897			1.65791	0.132062			1.65791	0.197529			1.65791	0.162214			1.65791	0.177739			1.65791	0.124928
	1.66449	0.161974			1.66449	0.163994			1.66449	0.144185			1.66449	0.139009			1.66449	0.131558			1.66449	0.196604			1.66449	0.163268			1.66449	0.176971			1.66449	0.125665
	1.67107	0.163607			1.67107	0.164065			1.67107	0.146441			1.67107	0.139987			1.67107	0.132101			1.67107	0.196789			1.67107	0.163266			1.67107	0.177654			1.67107	0.126354
	1.67766	0.163771			1.67766	0.163802			1.67766	0.147352			1.67766	0.138165			1.67766	0.131614			1.67766	0.19557			1.67766	0.162392			1.67766	0.176852			1.67766	0.125691
	1.68424	0.162978			1.68424	0.16282			1.68424	0.146276			1.68424	0.137391			1.68424	0.131385			1.68424	0.195037			1.68424	0.162352			1.68424	0.176986			1.68424	0.125216
	1.69082	0.163299			1.69082	0.163948			1.69082	0.145579			1.69082	0.138116			1.69082	0.131728			1.69082	0.195235			1.69082	0.162229			1.69082	0.176485			1.69082	0.124999
	1.69741	0.163349			1.69741	0.163622			1.69741	0.14612			1.69741	0.137086			1.69741	0.131408			1.69741	0.195077			1.69741	0.160945			1.69741	0.175762			1.69741	0.124901
	1.70399	0.163599			1.70399	0.16353			1.70399	0.14684			1.70399	0.137483			1.70399	0.131922			1.70399	0.195265			1.70399	0.162249			1.70399	0.176782			1.70399	0.125342
	1.71058	0.163447			1.71058	0.163364			1.71058	0.146318			1.71058	0.137013			1.71058	0.131745			1.71058	0.194384			1.71058	0.161843			1.71058	0.176013			1.71058	0.124871
	1.71716	0.163323			1.71716	0.16326			1.71716	0.146104			1.71716	0.136625			1.71716	0.131397			1.71716	0.194787			1.71716	0.162044			1.71716	0.176361			1.71716	0.124458
	1.72375	0.163472			1.72375	0.163433			1.72375	0.145975			1.72375	0.13677			1.72375	0.131612			1.72375	0.194461			1.72375	0.162631			1.72375	0.176933			1.72375	0.126267
	1.73033	0.162868			1.73033	0.163105			1.73033	0.146074			1.73033	0.136592			1.73033	0.13063			1.73033	0.1941			1.73033	0.162082			1.73033	0.175782			1.73033	0.124612
	1.73692	0.162779			1.73692	0.162812			1.73692	0.145529			1.73692	0.136183			1.73692	0.130061			1.73692	0.193465			1.73692	0.161766			1.73692	0.175519			1.73692	0.124615
	1.74351	0.162934			1.74351	0.162929			1.74351	0.145505			1.74351	0.136123			1.74351	0.129612			1.74351	0.19384			1.74351	0.162303			1.74351	0.175891			1.74351	0.124744
	1.75009	0.162696			1.75009	0.162836			1.75009	0.145392			1.75009	0.13594			1.75009	0.129894			1.75009	0.193693			1.75009	0.163167			1.75009	0.177244			1.75009	0.124444
	1.75668	0.162563			1.75668	0.162724			1.75668	0.145224			1.75668	0.135431			1.75668	0.129512			1.75668	0.193378			1.75668	0.160841			1.75668	0.173884			1.75668	0.124722
	1.76327	0.160163			1.76327	0.161604			1.76327	0.145195			1.76327	0.134882			1.76327	0.127858			1.76327	0.192441			1.76327	0.157503			1.76327	0.171562			1.76327	0.12443
	1.76985	0.162196			1.76985	0.162556			1.76985	0.145263			1.76985	0.135381			1.76985	0.128808			1.76985	0.192888			1.76985	0.160251			1.76985	0.174			1.76985	0.124433
	1.77644	0.160014			1.77644	0.160391			1.77644	0.144937			1.77644	0.134878			1.77644	0.129262			1.77644	0.19177			1.77644	0.159346			1.77644	0.172834			1.77644	0.124366
	1.78303	0.161873			1.78303	0.161891			1.78303	0.144941			1.78303	0.135699			1.78303	0.128914			1.78303	0.192015			1.78303	0.161294			1.78303	0.174357			1.78303	0.124323
	1.78962	0.16166			1.78962	0.161746			1.78962	0.144806			1.78962	0.135712			1.78962	0.129729			1.78962	0.192248			1.78962	0.160879			1.78962	0.174032			1.78962	0.124347
	1.79621	0.16188			1.79621	0.16178			1.79621	0.144968			1.79621	0.135271			1.79621	0.129373			1.79621	0.192234			1.79621	0.161336			1.79621	0.174048			1.79621	0.124468
	1.8028	0.161785			1.8028	0.161672			1.8028	0.145049			1.8028	0.135505			1.8028	0.129517			1.8028	0.192066			1.8028	0.160972			1.8028	0.173963			1.8028	0.124612
	1.80939	0.161584			1.80939	0.161491			1.80939	0.145064			1.80939	0.136375			1.80939	0.129539			1.80939	0.191703			1.80939	0.161012			1.80939	0.173542			1.80939	0.124714
	1.81598	0.161304			1.81598	0.161346			1.81598	0.145226			1.81598	0.13591			1.81598	0.129813			1.81598	0.191963			1.81598	0.160713			1.81598	0.173356			1.81598	0.125031
	1.82257	0.16113			1.82257	0.161193			1.82257	0.145556			1.82257	0.136095			1.82257	0.130012			1.82257	0.191506			1.82257	0.160553			1.82257	0.173255			1.82257	0.125183
	1.82916	0.16127			1.82916	0.161155			1.82916	0.145284			1.82916	0.136227			1.82916	0.129821			1.82916	0.191577			1.82916	0.160749			1.82916	0.173136			1.82916	0.125337
	1.83575	0.161154			1.83575	0.16123			1.83575	0.145613			1.83575	0.136459			1.83575	0.128792			1.83575	0.191424			1.83575	0.161057			1.83575	0.173409			1.83575	0.125455
	1.84234	0.161044			1.84234	0.161106			1.84234	0.14581			1.84234	0.136181			1.84234	0.129864			1.84234	0.191131			1.84234	0.160848			1.84234	0.173234			1.84234	0.125401
	1.84893	0.161109			1.84893	0.16091			1.84893	0.145604			1.84893	0.136477			1.84893	0.129204			1.84893	0.190721			1.84893	0.16087			1.84893	0.172839			1.84893	0.125523
	1.85552	0.160856			1.85552	0.161013			1.85552	0.145266			1.85552	0.13492			1.85552	0.129415			1.85552	0.19091			1.85552	0.160637			1.85552	0.172742			1.85552	0.125243
	1.86212	0.161118			1.86212	0.160732			1.86212	0.145332			1.86212	0.137574			1.86212	0.129048			1.86212	0.190941			1.86212	0.160275			1.86212	0.172732			1.86212	0.125368
	1.86871	0.161012			1.86871	0.161305			1.86871	0.146347			1.86871	0.138008			1.86871	0.130978			1.86871	0.191169			1.86871	0.160567			1.86871	0.17286			1.86871	0.126135
	1.8753	0.160853			1.8753	0.160775			1.8753	0.146028			1.8753	0.137114			1.8753	0.131252			1.8753	0.190685			1.8753	0.160501			1.8753	0.172615			1.8753	0.126399
	1.8819	0.160477			1.8819	0.160436			1.8819	0.145162			1.8819	0.136021			1.8819	0.130375			1.8819	0.189637			1.8819	0.160227			1.8819	0.17203			1.8819	0.125464
	1.88849	0.160281			1.88849	0.159948			1.88849	0.144962			1.88849	0.137194			1.88849	0.129558			1.88849	0.190333			1.88849	0.159944			1.88849	0.171347			1.88849	0.125641
	1.89508	0.159795			1.89508	0.159298			1.89508	0.145276			1.89508	0.13632			1.89508	0.129302			1.89508	0.189191			1.89508	0.15977			1.89508	0.17126			1.89508	0.125275
	1.90168	0.158832			1.90168	0.160285			1.90168	0.145368			1.90168	0.136347			1.90168	0.12976			1.90168	0.189688			1.90168	0.159642			1.90168	0.171125			1.90168	0.12569
	1.90827	0.159639			1.90827	0.159268			1.90827	0.145614			1.90827	0.136885			1.90827	0.129847			1.90827	0.189653			1.90827	0.159528			1.90827	0.171302			1.90827	0.125797
	1.91487	0.159765			1.91487	0.15914			1.91487	0.145652			1.91487	0.135967			1.91487	0.129001			1.91487	0.190154			1.91487	0.159501			1.91487	0.171285			1.91487	0.125854
	1.92146	0.159824			1.92146	0.159079			1.92146	0.145671			1.92146	0.136658			1.92146	0.129282			1.92146	0.190042			1.92146	0.159903			1.92146	0.171268			1.92146	0.125764
	1.92806	0.159768			1.92806	0.159082			1.92806	0.145599			1.92806	0.136372			1.92806	0.126916			1.92806	0.189508			1.92806	0.159956			1.92806	0.171205			1.92806	0.125735
	1.93465	0.159221			1.93465	0.158131			1.93465	0.145752			1.93465	0.137132			1.93465	0.129357			1.93465	0.189346			1.93465	0.15889			1.93465	0.170227			1.93465	0.12643
	1.94125	0.158541			1.94125	0.157326			1.94125	0.14806			1.94125	0.140403			1.94125	0.135012			1.94125	0.189895			1.94125	0.157565			1.94125	0.168586			1.94125	0.129064
	1.94785	0.158046			1.94785	0.157225			1.94785	0.149665			1.94785	0.143785			1.94785	0.137589			1.94785	0.189057			1.94785	0.157905			1.94785	0.168751			1.94785	0.132141
	1.95444	0.158932			1.95444	0.158815			1.95444	0.148005			1.95444	0.139412			1.95444	0.134174			1.95444	0.187946			1.95444	0.159792			1.95444	0.169742			1.95444	0.130827
	1.96104	0.159316			1.96104	0.159196			1.96104	0.143957			1.96104	0.133385			1.96104	0.127933			1.96104	0.18654			1.96104	0.160042			1.96104	0.170151			1.96104	0.125983
	1.96764	0.157953			1.96764	0.158266			1.96764	0.144903			1.96764	0.137284			1.96764	0.12861			1.96764	0.186278			1.96764	0.15917			1.96764	0.169182			1.96764	0.126652
	1.97424	0.158047			1.97424	0.157834			1.97424	0.145696			1.97424	0.138272			1.97424	0.129858			1.97424	0.186925			1.97424	0.159223			1.97424	0.168959			1.97424	0.128729
	1.98084	0.157953			1.98084	0.157744			1.98084	0.145129			1.98084	0.137157			1.98084	0.130171			1.98084	0.18669			1.98084	0.158911			1.98084	0.168612			1.98084	0.127092
	1.98743	0.157746			1.98743	0.157147			1.98743	0.145219			1.98743	0.136993			1.98743	0.132665			1.98743	0.187624			1.98743	0.158347			1.98743	0.168426			1.98743	0.127187
	1.99403	0.157159			1.99403	0.156298			1.99403	0.147465			1.99403	0.141851			1.99403	0.136448			1.99403	0.190108			1.99403	0.15727			1.99403	0.167867			1.99403	0.130111
	2.00063	0.157202			2.00063	0.156309			2.00063	0.150421			2.00063	0.143842			2.00063	0.141925			2.00063	0.190449			2.00063	0.157641			2.00063	0.167603			2.00063	0.133629
	2.00723	0.15796			2.00723	0.158082			2.00723	0.145426			2.00723	0.136069			2.00723	0.129898			2.00723	0.186385			2.00723	0.159842			2.00723	0.168302			2.00723	0.127407
	2.01383	0.155636			2.01383	0.156088			2.01383	0.146475			2.01383	0.140932			2.01383	0.137005			2.01383	0.183344			2.01383	0.158315			2.01383	0.166123			2.01383	0.131724
	2.02043	0.154261			2.02043	0.15463			2.02043	0.149586			2.02043	0.148088			2.02043	0.13878			2.02043	0.181926			2.02043	0.156256			2.02043	0.164296			2.02043	0.13617
	2.02703	0.154411			2.02703	0.154779			2.02703	0.148594			2.02703	0.144927			2.02703	0.135811			2.02703	0.182963			2.02703	0.15588			2.02703	0.163857			2.02703	0.134371
	2.03363	0.155879			2.03363	0.155751			2.03363	0.146741			2.03363	0.141308			2.03363	0.133158			2.03363	0.184748			2.03363	0.15659			2.03363	0.165646			2.03363	0.130981
	2.04024	0.156539			2.04024	0.156445			2.04024	0.145115			2.04024	0.138694			2.04024	0.131867			2.04024	0.185361			2.04024	0.157101			2.04024	0.166847			2.04024	0.128382
	2.04684	0.157096			2.04684	0.156865			2.04684	0.145278			2.04684	0.138753			2.04684	0.129394			2.04684	0.185928			2.04684	0.157624			2.04684	0.167647			2.04684	0.128596
	2.05344	0.157693			2.05344	0.157897			2.05344	0.143629			2.05344	0.135278			2.05344	0.128087			2.05344	0.185208			2.05344	0.158911			2.05344	0.168601			2.05344	0.127263
	2.06004	0.157868			2.06004	0.158087			2.06004	0.141646			2.06004	0.134553			2.06004	0.126614			2.06004	0.184767			2.06004	0.158487			2.06004	0.168989			2.06004	0.125185
	2.06664	0.156732			2.06664	0.15687			2.06664	0.143354			2.06664	0.137346			2.06664	0.130106			2.06664	0.184744			2.06664	0.157767			2.06664	0.16702			2.06664	0.127991
	2.07325	0.156016			2.07325	0.156777			2.07325	0.145261			2.07325	0.140042			2.07325	0.132536			2.07325	0.184048			2.07325	0.1572			2.07325	0.166834			2.07325	0.130299
	2.07985	0.155858			2.07985	0.156675			2.07985	0.144828			2.07985	0.139399			2.07985	0.132659			2.07985	0.184784			2.07985	0.157154			2.07985	0.166776			2.07985	0.129907
	2.08645	0.155429			2.08645	0.156057			2.08645	0.144684			2.08645	0.139297			2.08645	0.131431			2.08645	0.185074			2.08645	0.156755			2.08645	0.166658			2.08645	0.129377
	2.09306	0.155262			2.09306	0.155544			2.09306	0.144324			2.09306	0.139277			2.09306	0.131864			2.09306	0.184774			2.09306	0.155753			2.09306	0.166127			2.09306	0.128144
	2.09966	0.155324			2.09966	0.15591			2.09966	0.143599			2.09966	0.138589			2.09966	0.12986			2.09966	0.184637			2.09966	0.156287			2.09966	0.166212			2.09966	0.127299
	2.10627	0.15581			2.10627	0.156175			2.10627	0.142666			2.10627	0.136466			2.10627	0.128619			2.10627	0.184854			2.10627	0.156398			2.10627	0.166988			2.10627	0.126298
	2.11287	0.155561			2.11287	0.155786			2.11287	0.141929			2.11287	0.136051			2.11287	0.127035			2.11287	0.184298			2.11287	0.156022			2.11287	0.166934			2.11287	0.125356
	2.11948	0.155566			2.11948	0.155796			2.11948	0.141656			2.11948	0.13525			2.11948	0.128936			2.11948	0.184434			2.11948	0.156033			2.11948	0.167181			2.11948	0.124894
	2.12608	0.155962			2.12608	0.156083			2.12608	0.141182			2.12608	0.134444			2.12608	0.127757			2.12608	0.184663			2.12608	0.155797			2.12608	0.167463			2.12608	0.124877
	2.13269	0.155305			2.13269	0.155941			2.13269	0.140832			2.13269	0.135344			2.13269	0.127938			2.13269	0.18489			2.13269	0.155834			2.13269	0.16728			2.13269	0.124501
	2.1393	0.156182			2.1393	0.156189			2.1393	0.140863			2.1393	0.134969			2.1393	0.126859			2.1393	0.184924			2.1393	0.156252			2.1393	0.168085			2.1393	0.123942
	2.1459	0.155844			2.1459	0.15657			2.1459	0.14052			2.1459	0.135184			2.1459	0.128206			2.1459	0.184938			2.1459	0.155952			2.1459	0.167901			2.1459	0.12432
	2.15251	0.156109			2.15251	0.156463			2.15251	0.140508			2.15251	0.133977			2.15251	0.12785			2.15251	0.185094			2.15251	0.156114			2.15251	0.168349			2.15251	0.124097
	2.15912	0.155863			2.15912	0.156548			2.15912	0.140479			2.15912	0.135044			2.15912	0.129118			2.15912	0.184899			2.15912	0.156057			2.15912	0.168068			2.15912	0.124077
	2.16572	0.155735			2.16572	0.15627			2.16572	0.140784			2.16572	0.135615			2.16572	0.128411			2.16572	0.184428			2.16572	0.155694			2.16572	0.167815			2.16572	0.124494
	2.17233	0.155739			2.17233	0.156147			2.17233	0.140334			2.17233	0.135256			2.17233	0.128319			2.17233	0.184675			2.17233	0.155423			2.17233	0.16781			2.17233	0.124558
	2.17894	0.155726			2.17894	0.156016			2.17894	0.140291			2.17894	0.13505			2.17894	0.128516			2.17894	0.184337			2.17894	0.155543			2.17894	0.167588			2.17894	0.124013
	2.18555	0.155515			2.18555	0.156143			2.18555	0.140253			2.18555	0.135281			2.18555	0.129857			2.18555	0.184621			2.18555	0.155719			2.18555	0.167947			2.18555	0.124204
	2.19216	0.155599			2.19216	0.155835			2.19216	0.140101			2.19216	0.13468			2.19216	0.128749			2.19216	0.184587			2.19216	0.155563			2.19216	0.167964			2.19216	0.124228
	2.19877	0.155469			2.19877	0.156167			2.19877	0.140225			2.19877	0.135301			2.19877	0.129423			2.19877	0.185206			2.19877	0.155316			2.19877	0.167847			2.19877	0.124092
	2.20538	0.155475			2.20538	0.156117			2.20538	0.14018			2.20538	0.13524			2.20538	0.128776			2.20538	0.184517			2.20538	0.153881			2.20538	0.166618			2.20538	0.124577
	2.21199	0.155617			2.21199	0.155915			2.21199	0.139979			2.21199	0.134007			2.21199	0.130576			2.21199	0.184731			2.21199	0.155224			2.21199	0.167789			2.21199	0.124508
	2.2186	0.155559			2.2186	0.156052			2.2186	0.140097			2.2186	0.135289			2.2186	0.13146			2.2186	0.18463			2.2186	0.155095			2.2186	0.16776			2.2186	0.124853
	2.22521	0.155509			2.22521	0.156007			2.22521	0.139894			2.22521	0.135108			2.22521	0.129174			2.22521	0.184439			2.22521	0.155152			2.22521	0.168176			2.22521	0.124413
	2.23182	0.155238			2.23182	0.156121			2.23182	0.139897			2.23182	0.135436			2.23182	0.128868			2.23182	0.184026			2.23182	0.155051			2.23182	0.167956			2.23182	0.124278
	2.23843	0.155118			2.23843	0.155682			2.23843	0.139679			2.23843	0.134957			2.23843	0.128905			2.23843	0.183915			2.23843	0.154974			2.23843	0.167829			2.23843	0.124329
	2.24504	0.155603			2.24504	0.156149			2.24504	0.139735			2.24504	0.136347			2.24504	0.128844			2.24504	0.184316			2.24504	0.155014			2.24504	0.168258			2.24504	0.124593
	2.25165	0.155567			2.25165	0.156062			2.25165	0.139678			2.25165	0.135777			2.25165	0.13314			2.25165	0.184048			2.25165	0.154974			2.25165	0.168143			2.25165	0.124713
	2.25827	0.15527			2.25827	0.155934			2.25827	0.139426			2.25827	0.135602			2.25827	0.131742			2.25827	0.183797			2.25827	0.154627			2.25827	0.168264			2.25827	0.124475
	2.26488	0.154853			2.26488	0.155686			2.26488	0.139008			2.26488	0.135432			2.26488	0.130155			2.26488	0.183525			2.26488	0.154228			2.26488	0.168001			2.26488	0.124512
	2.27149	0.155476			2.27149	0.156077			2.27149	0.139572			2.27149	0.13639			2.27149	0.132321			2.27149	0.183976			2.27149	0.154366			2.27149	0.168666			2.27149	0.124806
	2.2781	0.155439			2.2781	0.15607			2.2781	0.139417			2.2781	0.135634			2.2781	0.13066			2.2781	0.184162			2.2781	0.154927			2.2781	0.168759			2.2781	0.124967
	2.28472	0.155735			2.28472	0.156169			2.28472	0.139489			2.28472	0.13541			2.28472	0.130033			2.28472	0.184307			2.28472	0.154816			2.28472	0.169059			2.28472	0.125348
	2.29133	0.155806			2.29133	0.156229			2.29133	0.139744			2.29133	0.137096			2.29133	0.130531			2.29133	0.184282			2.29133	0.154977			2.29133	0.169326			2.29133	0.125423
	2.29795	0.155909			2.29795	0.156436			2.29795	0.139625			2.29795	0.136321			2.29795	0.13157			2.29795	0.184484			2.29795	0.155108			2.29795	0.169352			2.29795	0.125205
	2.30456	0.155716			2.30456	0.156331			2.30456	0.13973			2.30456	0.13556			2.30456	0.132606			2.30456	0.184373			2.30456	0.154653			2.30456	0.169397			2.30456	0.125388
	2.31118	0.155507			2.31118	0.156179			2.31118	0.139694			2.31118	0.136265			2.31118	0.133905			2.31118	0.184426			2.31118	0.154329			2.31118	0.169251			2.31118	0.125806
	2.31779	0.155245			2.31779	0.155864			2.31779	0.139521			2.31779	0.136453			2.31779	0.131715			2.31779	0.183979			2.31779	0.15424			2.31779	0.169051			2.31779	0.125729
	2.32441	0.155223			2.32441	0.15637			2.32441	0.139121			2.32441	0.135957			2.32441	0.131668			2.32441	0.18405			2.32441	0.154383			2.32441	0.169189			2.32441	0.125292
	2.33102	0.155196			2.33102	0.156402			2.33102	0.138921			2.33102	0.136606			2.33102	0.13005			2.33102	0.183823			2.33102	0.154346			2.33102	0.169231			2.33102	0.125214
	2.33764	0.155441			2.33764	0.156761			2.33764	0.139085			2.33764	0.135565			2.33764	0.130893			2.33764	0.184064			2.33764	0.154558			2.33764	0.169614			2.33764	0.125394
	2.34426	0.155116			2.34426	0.156252			2.34426	0.138979			2.34426	0.136225			2.34426	0.131513			2.34426	0.184242			2.34426	0.154241			2.34426	0.169621			2.34426	0.126046
	2.35087	0.155775			2.35087	0.156813			2.35087	0.139163			2.35087	0.13739			2.35087	0.131701			2.35087	0.184053			2.35087	0.154499			2.35087	0.170176			2.35087	0.125669
	2.35749	0.155586			2.35749	0.157032			2.35749	0.139114			2.35749	0.137918			2.35749	0.1307			2.35749	0.184348			2.35749	0.154689			2.35749	0.170248			2.35749	0.126436
	2.36411	0.155621			2.36411	0.157153			2.36411	0.139263			2.36411	0.137511			2.36411	0.131879			2.36411	0.184348			2.36411	0.15462			2.36411	0.170213			2.36411	0.126033
	2.37072	0.156107			2.37072	0.157215			2.37072	0.139575			2.37072	0.140218			2.37072	0.133399			2.37072	0.184448			2.37072	0.154636			2.37072	0.171026			2.37072	0.126117
	2.37734	0.155497			2.37734	0.157101			2.37734	0.139348			2.37734	0.139219			2.37734	0.132761			2.37734	0.184548			2.37734	0.154483			2.37734	0.17055			2.37734	0.127166
	2.38396	0.155001			2.38396	0.156368			2.38396	0.138797			2.38396	0.138432			2.38396	0.132955			2.38396	0.18421			2.38396	0.153655			2.38396	0.169862			2.38396	0.12611
	2.39058	0.155115			2.39058	0.156492			2.39058	0.13901			2.39058	0.138025			2.39058	0.13217			2.39058	0.183733			2.39058	0.153885			2.39058	0.170433			2.39058	0.126506
	2.3972	0.155356			2.3972	0.156909			2.3972	0.139269			2.3972	0.138449			2.3972	0.133587			2.3972	0.184504			2.3972	0.154232			2.3972	0.170574			2.3972	0.126707
	2.40382	0.155723			2.40382	0.157145			2.40382	0.139666			2.40382	0.138917			2.40382	0.133819			2.40382	0.184848			2.40382	0.154322			2.40382	0.170869			2.40382	0.127397
	2.41044	0.156189			2.41044	0.157724			2.41044	0.1401			2.41044	0.139501			2.41044	0.134742			2.41044	0.18621			2.41044	0.154834			2.41044	0.171558			2.41044	0.127775
	2.41706	0.156436			2.41706	0.158145			2.41706	0.140303			2.41706	0.14036			2.41706	0.135077			2.41706	0.185676			2.41706	0.155088			2.41706	0.171819			2.41706	0.127768
	2.42368	0.156323			2.42368	0.157962			2.42368	0.13966			2.42368	0.140206			2.42368	0.135227			2.42368	0.185671			2.42368	0.154934			2.42368	0.171885			2.42368	0.128319
	2.4303	0.156585			2.4303	0.158024			2.4303	0.139724			2.4303	0.140688			2.4303	0.134702			2.4303	0.186111			2.4303	0.155077			2.4303	0.172198			2.4303	0.128013
	2.43692	0.156491			2.43692	0.158195			2.43692	0.139829			2.43692	0.140923			2.43692	0.136794			2.43692	0.185776			2.43692	0.154939			2.43692	0.17216			2.43692	0.128408
	2.44354	0.156878			2.44354	0.158375			2.44354	0.140555			2.44354	0.141432			2.44354	0.135677			2.44354	0.185961			2.44354	0.155188			2.44354	0.172379			2.44354	0.128926
	2.45017	0.156678			2.45017	0.158613			2.45017	0.140089			2.45017	0.141399			2.45017	0.136167			2.45017	0.185969			2.45017	0.155165			2.45017	0.172605			2.45017	0.128614
	2.45679	0.156803			2.45679	0.158688			2.45679	0.139425			2.45679	0.141958			2.45679	0.13632			2.45679	0.186083			2.45679	0.155253			2.45679	0.173046			2.45679	0.128845
	2.46341	0.15699			2.46341	0.158531			2.46341	0.140107			2.46341	0.140886			2.46341	0.1367			2.46341	0.18623			2.46341	0.155364			2.46341	0.173331			2.46341	0.128968
	2.47003	0.156698			2.47003	0.158596			2.47003	0.140321			2.47003	0.141838			2.47003	0.138497			2.47003	0.18584			2.47003	0.154881			2.47003	0.173279			2.47003	0.129098
	2.47666	0.156029			2.47666	0.157893			2.47666	0.139615			2.47666	0.141357			2.47666	0.137294			2.47666	0.185405			2.47666	0.153376			2.47666	0.172225			2.47666	0.128532
	2.48328	0.156053			2.48328	0.157676			2.48328	0.139441			2.48328	0.142864			2.48328	0.136215			2.48328	0.1851			2.48328	0.153856			2.48328	0.172953			2.48328	0.129401
	2.4899	0.156084			2.4899	0.157892			2.4899	0.140088			2.4899	0.142496			2.4899	0.137596			2.4899	0.185816			2.4899	0.153585			2.4899	0.172929			2.4899	0.129863
	2.49653	0.15693			2.49653	0.158746			2.49653	0.140237			2.49653	0.143092			2.49653	0.138021			2.49653	0.186191			2.49653	0.154843			2.49653	0.173858			2.49653	0.129919
	2.50312	0.156651			2.50312	0.15857			2.50312	0.140032			2.50312	0.143212			2.50312	0.138197			2.50312	0.185738			2.50312	0.154736			2.50312	0.173677			2.50312	0.13004
	2.50972	0.156586			2.50972	0.158497			2.50972	0.140674			2.50972	0.143399			2.50972	0.13808			2.50972	0.185961			2.50972	0.154325			2.50972	0.17384			2.50972	0.130404
	2.51632	0.156258			2.51632	0.158409			2.51632	0.140144			2.51632	0.143722			2.51632	0.140253			2.51632	0.185758			2.51632	0.15452			2.51632	0.173372			2.51632	0.130373
	2.52292	0.155858			2.52292	0.157759			2.52292	0.139558			2.52292	0.14499			2.52292	0.138653			2.52292	0.185562			2.52292	0.153522			2.52292	0.173041			2.52292	0.130628
	2.52951	0.155391			2.52951	0.157396			2.52951	0.139998			2.52951	0.144992			2.52951	0.138495			2.52951	0.185102			2.52951	0.153306			2.52951	0.172811			2.52951	0.130861
	2.53611	0.15519			2.53611	0.157432			2.53611	0.140197			2.53611	0.144634			2.53611	0.139564			2.53611	0.185024			2.53611	0.152824			2.53611	0.172296			2.53611	0.131457
	2.54271	0.154847			2.54271	0.157026			2.54271	0.140173			2.54271	0.145951			2.54271	0.135343			2.54271	0.184949			2.54271	0.152533			2.54271	0.172303			2.54271	0.131166
	2.54931	0.154611			2.54931	0.156785			2.54931	0.139817			2.54931	0.14538			2.54931	0.138544			2.54931	0.184333			2.54931	0.151991			2.54931	0.171819			2.54931	0.131217
	2.55591	0.154797			2.55591	0.156906			2.55591	0.139301			2.55591	0.145223			2.55591	0.140291			2.55591	0.184435			2.55591	0.151611			2.55591	0.172065			2.55591	0.131265
	2.56251	0.154805			2.56251	0.157426			2.56251	0.140136			2.56251	0.146372			2.56251	0.141817			2.56251	0.184645			2.56251	0.151872			2.56251	0.172212			2.56251	0.132143
	2.56911	0.154333			2.56911	0.156369			2.56911	0.140227			2.56911	0.146787			2.56911	0.141165			2.56911	0.184637			2.56911	0.151445			2.56911	0.172119			2.56911	0.132355
	2.57571	0.154676			2.57571	0.156899			2.57571	0.140117			2.57571	0.146868			2.57571	0.142753			2.57571	0.185068			2.57571	0.150877			2.57571	0.172261			2.57571	0.132451
	2.58231	0.154595			2.58231	0.156739			2.58231	0.14048			2.58231	0.148695			2.58231	0.14286			2.58231	0.184924			2.58231	0.151257			2.58231	0.172444			2.58231	0.133301
	2.58891	0.153954			2.58891	0.156505			2.58891	0.141384			2.58891	0.150246			2.58891	0.145779			2.58891	0.1849			2.58891	0.151281			2.58891	0.171857			2.58891	0.134217
	2.59551	0.153434			2.59551	0.155944			2.59551	0.14281			2.59551	0.150871			2.59551	0.144886			2.59551	0.184228			2.59551	0.150219			2.59551	0.171352			2.59551	0.135606
	2.60212	0.152511			2.60212	0.155173			2.60212	0.141717			2.60212	0.150277			2.60212	0.143867			2.60212	0.184046			2.60212	0.149876			2.60212	0.170393			2.60212	0.135453
	2.60872	0.153111			2.60872	0.155245			2.60872	0.142028			2.60872	0.150303			2.60872	0.146467			2.60872	0.1845			2.60872	0.150022			2.60872	0.171126			2.60872	0.135946
	2.61532	0.152879			2.61532	0.154803			2.61532	0.142881			2.61532	0.151436			2.61532	0.14607			2.61532	0.183976			2.61532	0.14917			2.61532	0.17097			2.61532	0.136983
	2.62192	0.153262			2.62192	0.1561			2.62192	0.142943			2.62192	0.151761			2.62192	0.146889			2.62192	0.184775			2.62192	0.1506			2.62192	0.171413			2.62192	0.136814
	2.62853	0.15296			2.62853	0.155173			2.62853	0.142008			2.62853	0.152401			2.62853	0.144311			2.62853	0.184667			2.62853	0.150163			2.62853	0.171248			2.62853	0.136413
	2.63513	0.151774			2.63513	0.154367			2.63513	0.141363			2.63513	0.150135			2.63513	0.144126			2.63513	0.184309			2.63513	0.149537			2.63513	0.170267			2.63513	0.134388
	2.64174	0.150986			2.64174	0.152683			2.64174	0.1399			2.64174	0.147046			2.64174	0.141877			2.64174	0.182199			2.64174	0.148306			2.64174	0.169535			2.64174	0.132772
	2.64834	0.147507			2.64834	0.149498			2.64834	0.138626			2.64834	0.145572			2.64834	0.141663			2.64834	0.18157			2.64834	0.146613			2.64834	0.165655			2.64834	0.132475
	2.65495	0.140184			2.65495	0.143978			2.65495	0.13906			2.65495	0.146826			2.65495	0.141973			2.65495	0.177363			2.65495	0.140709			2.65495	0.15821			2.65495	0.134128
	2.80035	0.051831			2.80035	0.045415			2.80035	65535			2.80035	65535			2.80035	65535			2.80035	4502.47			2.80035	53839.5			2.80035	0.055561			2.80035	62720.6
	2.80697	0.054922			2.80697	0.057163			2.80697	28755.2			2.80697	65535			2.80697	65535			2.80697	2001.14			2.80697	20567.9			2.80697	0.056507			2.80697	46638.4
	2.81358	0.057903			2.81358	0.060995			2.81358	0.113059			2.81358	61073			2.81358	65535			2.81358	3001.67			2.81358	3226.39			2.81358	0.058982			2.81358	16283.3
	2.8202	0.059285			2.8202	0.062987			2.8202	0.095266			2.8202	30118.3			2.8202	63014.4			2.8202	0.066481			2.8202	2419.8			2.8202	0.061497			2.8202	804.19
	2.82681	0.059816			2.82681	0.063824			2.82681	0.086883			2.82681	6693.01			2.82681	52932.1			2.82681	0.064811			2.82681	0.050828			2.82681	0.061952			2.82681	0.075325
	2.83343	0.060419			2.83343	0.063828			2.83343	0.080027			2.83343	557.818			2.83343	19324.5			2.83343	0.063264			2.83343	0.050235			2.83343	0.062125			2.83343	0.070586
	2.84004	0.060493			2.84004	0.063496			2.84004	0.076808			2.84004	0.0685			2.84004	0.049716			2.84004	0.063391			2.84004	0.051835			2.84004	0.062391			2.84004	0.066583
	2.84666	0.061116			2.84666	0.063867			2.84666	0.07439			2.84666	557.812			2.84666	0.050488			2.84666	0.064811			2.84666	0.052764			2.84666	0.063623			2.84666	0.063723
	2.85328	0.061824			2.85328	0.063468			2.85328	0.073288			2.85328	0.067599			2.85328	0.055578			2.85328	0.065612			2.85328	0.053704			2.85328	0.064504			2.85328	0.06162
	2.85989	0.062495			2.85989	0.063495			2.85989	0.071906			2.85989	0.067232			2.85989	0.05923			2.85989	0.065804			2.85989	0.054387			2.85989	0.065357			2.85989	0.061262
	2.86651	0.063267			2.86651	0.063303			2.86651	0.071526			2.86651	0.066991			2.86651	0.059407			2.86651	0.06616			2.86651	0.054967			2.86651	0.066325			2.86651	0.060198
	2.87313	0.064204			2.87313	0.063414			2.87313	0.069688			2.87313	0.068951			2.87313	0.054893			2.87313	0.066031			2.87313	0.055776			2.87313	0.067081			2.87313	0.059383
	2.87975	0.06488			2.87975	0.063976			2.87975	0.068603			2.87975	0.066698			2.87975	0.051795			2.87975	0.066415			2.87975	0.056812			2.87975	0.068023			2.87975	0.058789
	2.88636	0.06573			2.88636	0.064798			2.88636	0.068252			2.88636	0.067083			2.88636	0.051998			2.88636	0.06692			2.88636	0.057244			2.88636	0.068881			2.88636	0.058139
	2.89298	0.066134			2.89298	0.065321			2.89298	0.067398			2.89298	0.065696			2.89298	0.051313			2.89298	0.066938			2.89298	0.058197			2.89298	0.069274			2.89298	0.057645
	2.8996	0.066369			2.8996	0.065444			2.8996	0.066101			2.8996	0.067077			2.8996	0.053914			2.8996	0.067195			2.8996	0.058905			2.8996	0.069471			2.8996	0.056633
	2.90622	0.066489			2.90622	0.065464			2.90622	0.064839			2.90622	0.063337			2.90622	0.05555			2.90622	0.067574			2.90622	0.058447			2.90622	0.070177			2.90622	0.055498
	2.91284	0.066896			2.91284	0.065275			2.91284	0.063922			2.91284	0.061562			2.91284	0.055963			2.91284	0.06811			2.91284	0.058589			2.91284	0.070723			2.91284	0.054674
	2.91946	0.067626			2.91946	0.065591			2.91946	0.063957			2.91946	0.060843			2.91946	0.053556			2.91946	0.068476			2.91946	0.05922			2.91946	0.071188			2.91946	0.053867
	2.92608	0.068314			2.92608	0.066073			2.92608	0.063841			2.92608	0.059503			2.92608	0.053669			2.92608	0.068398			2.92608	0.060356			2.92608	0.071543			2.92608	0.053627
	2.9327	0.068845			2.9327	0.06624			2.9327	0.063387			2.9327	0.05882			2.9327	0.052492			2.9327	0.067978			2.9327	0.06112			2.9327	0.071639			2.9327	0.053234
	2.93932	0.069327			2.93932	0.066835			2.93932	0.062878			2.93932	0.061328			2.93932	0.053204			2.93932	0.068219			2.93932	0.061527			2.93932	0.072069			2.93932	0.052929
	2.94595	0.069667			2.94595	0.067506			2.94595	0.062743			2.94595	0.06112			2.94595	0.055997			2.94595	0.068578			2.94595	0.06177			2.94595	0.072165			2.94595	0.052634
	2.95257	0.070098			2.95257	0.068158			2.95257	0.062286			2.95257	0.060535			2.95257	0.055678			2.95257	0.069272			2.95257	0.062122			2.95257	0.072723			2.95257	0.052392
	2.95919	0.070767			2.95919	0.069013			2.95919	0.061821			2.95919	0.059437			2.95919	0.054783			2.95919	0.069871			2.95919	0.063116			2.95919	0.073659			2.95919	0.05226
	2.96581	0.071453			2.96581	0.06998			2.96581	0.061887			2.96581	0.06025			2.96581	0.051974			2.96581	0.070384			2.96581	0.064427			2.96581	0.074512			2.96581	0.05286
	2.97244	0.072103			2.97244	0.070914			2.97244	0.062416			2.97244	0.058031			2.97244	0.049695			2.97244	0.070815			2.97244	0.065216			2.97244	0.075481			2.97244	0.053364
	2.97906	0.072542			2.97906	0.071711			2.97906	0.062107			2.97906	0.058313			2.97906	0.048883			2.97906	0.070885			2.97906	0.065862			2.97906	0.075977			2.97906	0.05353
	2.98568	0.072863			2.98568	0.072268			2.98568	0.061803			2.98568	0.057841			2.98568	0.04938			2.98568	0.071026			2.98568	0.065789			2.98568	0.076616			2.98568	0.052868
	2.99231	0.073314			2.99231	0.072985			2.99231	0.061859			2.99231	0.059933			2.99231	0.050378			2.99231	0.071574			2.99231	0.066495			2.99231	0.077273			2.99231	0.052852
	2.99893	0.074196			2.99893	0.073798			2.99893	0.061932			2.99893	0.060313			2.99893	0.050869			2.99893	0.072621			2.99893	0.066748			2.99893	0.078029			2.99893	0.053121
	3.00556	0.075029			3.00556	0.074484			3.00556	0.062324			3.00556	0.060055			3.00556	0.051502			3.00556	0.073825			3.00556	0.067205			3.00556	0.078949			3.00556	0.053371
	3.01218	0.0762			3.01218	0.075797			3.01218	0.062366			3.01218	0.059239			3.01218	0.053314			3.01218	0.074471			3.01218	0.068328			3.01218	0.080114			3.01218	0.05412
	3.01881	0.077031			3.01881	0.076948			3.01881	0.062753			3.01881	0.058629			3.01881	0.054661			3.01881	0.074817			3.01881	0.069224			3.01881	0.081504			3.01881	0.054149
	3.02544	0.077955			3.02544	0.077954			3.02544	0.062964			3.02544	0.057075			3.02544	0.054221			3.02544	0.075394			3.02544	0.070039			3.02544	0.082768			3.02544	0.054389
	3.03206	0.079151			3.03206	0.079067			3.03206	0.063092			3.03206	0.057988			3.03206	0.053775			3.03206	0.075999			3.03206	0.071183			3.03206	0.084064			3.03206	0.053973
	3.03869	0.080212			3.03869	0.079985			3.03869	0.062659			3.03869	0.058205			3.03869	0.051903			3.03869	0.076374			3.03869	0.071778			3.03869	0.085112			3.03869	0.054032
	3.04532	0.081317			3.04532	0.081504			3.04532	0.062184			3.04532	0.060454			3.04532	0.053718			3.04532	0.076879			3.04532	0.07156			3.04532	0.085715			3.04532	0.054035
	3.05195	0.081957			3.05195	0.082709			3.05195	0.061535			3.05195	0.058914			3.05195	0.055824			3.05195	0.077497			3.05195	0.071492			3.05195	0.086208			3.05195	0.053543
	3.05857	0.082232			3.05857	0.084059			3.05857	0.060405			3.05857	0.06002			3.05857	0.055259			3.05857	0.078126			3.05857	0.071345			3.05857	0.086483			3.05857	0.053189
	3.0652	0.082808			3.0652	0.085065			3.0652	0.060108			3.0652	0.060092			3.0652	0.053802			3.0652	0.078683			3.0652	0.071271			3.0652	0.087138			3.0652	0.052875
	3.07183	0.08366			3.07183	0.086242			3.07183	0.060361			3.07183	0.060437			3.07183	0.054346			3.07183	0.079239			3.07183	0.071888			3.07183	0.087982			3.07183	0.053048
	3.07846	0.084487			3.07846	0.087485			3.07846	0.061318			3.07846	0.060567			3.07846	0.055957			3.07846	0.079819			3.07846	0.072531			3.07846	0.088877			3.07846	0.053784
	3.08509	0.085494			3.08509	0.088728			3.08509	0.061464			3.08509	0.061339			3.08509	0.0561			3.08509	0.080674			3.08509	0.073268			3.08509	0.090421			3.08509	0.054125
	3.09172	0.086632			3.09172	0.090323			3.09172	0.061487			3.09172	0.062595			3.09172	0.055652			3.09172	0.081547			3.09172	0.074779			3.09172	0.092059			3.09172	0.054313
	3.09835	0.087536			3.09835	0.092196			3.09835	0.061451			3.09835	0.062722			3.09835	0.054711			3.09835	0.082284			3.09835	0.075289			3.09835	0.093538			3.09835	0.054386
	3.10498	0.088608			3.10498	0.093633			3.10498	0.061086			3.10498	0.062689			3.10498	0.053151			3.10498	0.083394			3.10498	0.075694			3.10498	0.095073			3.10498	0.054076
	3.11161	0.089702			3.11161	0.094934			3.11161	0.060835			3.11161	0.064278			3.11161	0.053348			3.11161	0.084249			3.11161	0.076333			3.11161	0.096708			3.11161	0.053775
	3.11825	0.090693			3.11825	0.096171			3.11825	0.061068			3.11825	0.065174			3.11825	0.055251			3.11825	0.084338			3.11825	0.077056			3.11825	0.098116			3.11825	0.054105
	3.12488	0.091614			3.12488	0.097313			3.12488	0.060965			3.12488	0.063685			3.12488	0.056002			3.12488	0.085035			3.12488	0.07772			3.12488	0.099044			3.12488	0.054128
	3.13151	0.091978			3.13151	0.098336			3.13151	0.06015			3.13151	0.063166			3.13151	0.055603			3.13151	0.085623			3.13151	0.078455			3.13151	0.099548			3.13151	0.053964
	3.13814	0.091988			3.13814	0.099483			3.13814	0.059522			3.13814	0.064758			3.13814	0.053497			3.13814	0.085933			3.13814	0.078739			3.13814	0.099672			3.13814	0.053779
	3.14478	0.092623			3.14478	0.10079			3.14478	0.059535			3.14478	0.065333			3.14478	0.051213			3.14478	0.086271			3.14478	0.079496			3.14478	0.100506			3.14478	0.053545
	3.15141	0.093869			3.15141	0.102119			3.15141	0.060273			3.15141	0.064409			3.15141	0.053031			3.15141	0.086576			3.15141	0.081085			3.15141	0.10212			3.15141	0.053701
	3.15804	0.095163			3.15804	0.103972			3.15804	0.060536			3.15804	0.064784			3.15804	0.055458			3.15804	0.087322			3.15804	0.082556			3.15804	0.103891			3.15804	0.054932
	3.16468	0.096907			3.16468	0.105665			3.16468	0.060787			3.16468	0.064269			3.16468	0.056145			3.16468	0.088915			3.16468	0.084092			3.16468	0.105836			3.16468	0.055896
	3.17131	0.098735			3.17131	0.1073			3.17131	0.061275			3.17131	0.065058			3.17131	0.057641			3.17131	0.090621			3.17131	0.085747			3.17131	0.107911			3.17131	0.056411
	3.17795	0.100117			3.17795	0.10899			3.17795	0.061789			3.17795	0.066726			3.17795	0.059918			3.17795	0.092588			3.17795	0.086566			3.17795	0.109696			3.17795	0.057366
	3.18458	0.102028			3.18458	0.110715			3.18458	0.062669			3.18458	0.06861			3.18458	0.061647			3.18458	0.0946			3.18458	0.087661			3.18458	0.112047			3.18458	0.05808
	3.19122	0.104437			3.19122	0.112934			3.19122	0.064069			3.19122	0.069931			3.19122	0.063158			3.19122	0.096418			3.19122	0.089255			3.19122	0.114752			3.19122	0.058534
	3.19785	0.106402			3.19785	0.115214			3.19785	0.06523			3.19785	0.072301			3.19785	0.064883			3.19785	0.097647			3.19785	0.091169			3.19785	0.117199			3.19785	0.059701
	3.20449	0.107871			3.20449	0.117309			3.20449	0.066511			3.20449	0.073113			3.20449	0.065576			3.20449	0.098894			3.20449	0.093194			3.20449	0.119072			3.20449	0.061254
	3.21113	0.109276			3.21113	0.118502			3.21113	0.067444			3.21113	0.073924			3.21113	0.067033			3.21113	0.100092			3.21113	0.094643			3.21113	0.1208			3.21113	0.062071
	3.21776	0.110529			3.21776	0.119891			3.21776	0.06793			3.21776	21194.3			3.21776	0.067195			3.21776	0.101461			3.21776	0.096538			3.21776	0.12228			3.21776	0.062803
	3.2244	0.112254			3.2244	0.121255			3.2244	0.068802			3.2244	12549.3			3.2244	0.066738			3.2244	0.103073			3.2244	0.098268			3.2244	0.124142			3.2244	0.063826
	3.23104	0.114665			3.23104	0.122486			3.23104	0.070102			3.23104	12549.3			3.23104	0.067975			3.23104	0.105035			3.23104	0.099975			3.23104	0.127011			3.23104	0.064262
	3.23768	0.116837			3.23768	0.12422			3.23768	0.071512			3.23768	12549.3			3.23768	0.068307			3.23768	0.106455			3.23768	0.101947			3.23768	0.129791			3.23768	0.065144
	3.24432	0.118881			3.24432	0.125747			3.24432	0.07294			3.24432	21194.4			3.24432	0.069813			3.24432	0.10819			3.24432	0.103116			3.24432	0.132512			3.24432	0.066345
	3.25096	0.121414			3.25096	0.127691			3.25096	0.074056			3.25096	0.07884			3.25096	0.071167			3.25096	0.109504			3.25096	0.10454			3.25096	0.135514			3.25096	0.067189
	3.2576	0.123419			3.2576	0.129637			3.2576	0.074795			3.2576	0.078786			3.2576	0.072953			3.2576	0.110933			3.2576	0.105581			3.2576	0.13796			3.2576	0.067943
	3.26424	0.124359			3.26424	0.131021			3.26424	0.075278			3.26424	0.078349			3.26424	0.07445			3.26424	0.112171			3.26424	0.107052			3.26424	0.139572			3.26424	0.068966
	3.27088	0.125919			3.27088	0.132731			3.27088	0.076234			3.27088	0.078911			3.27088	0.075819			3.27088	0.113487			3.27088	0.10947			3.27088	0.141839			3.27088	0.070566
	3.27752	0.12852			3.27752	0.135361			3.27752	0.077753			3.27752	0.079947			3.27752	0.075676			3.27752	0.115202			3.27752	0.11223			3.27752	0.144764			3.27752	0.071633
	3.28416	0.131254			3.28416	0.137902			3.28416	0.079645			3.28416	0.083063			3.28416	0.07682			3.28416	0.117458			3.28416	0.115275			3.28416	0.147589			3.28416	0.072515
	3.2908	0.134362			3.2908	0.140553			3.2908	0.081496			3.2908	0.084783			3.2908	0.078228			3.2908	0.119993			3.2908	0.11744			3.2908	0.151195			3.2908	0.073907
	3.29744	0.137643			3.29744	0.142698			3.29744	0.083319			3.29744	0.087			3.29744	0.079511			3.29744	0.122293			3.29744	0.119306			3.29744	0.155409			3.29744	0.074851
	3.30408	0.14049			3.30408	0.145133			3.30408	0.084389			3.30408	0.088583			3.30408	0.082074			3.30408	0.124683			3.30408	0.121529			3.30408	0.158759			3.30408	0.076216
	3.31073	0.143077			3.31073	0.147618			3.31073	0.085333			3.31073	0.090885			3.31073	0.084288			3.31073	0.127628			3.31073	0.124333			3.31073	0.161593			3.31073	0.077739
	3.31737	0.145746			3.31737	0.150005			3.31737	0.086499			3.31737	0.092572			3.31737	0.085284			3.31737	0.130572			3.31737	0.126821			3.31737	0.165117			3.31737	0.079394
	3.32401	0.148387			3.32401	0.152137			3.32401	0.087419			3.32401	0.094579			3.32401	0.086195			3.32401	0.1323			3.32401	0.129639			3.32401	0.168353			3.32401	0.079825
	3.33066	0.150466			3.33066	0.154799			3.33066	0.088568			3.33066	0.094111			3.33066	0.086877			3.33066	0.133447			3.33066	0.131202			3.33066	0.171309			3.33066	0.08112
	3.3373	0.153091			3.3373	0.15712			3.3373	0.090014			3.3373	0.094052			3.3373	0.087868			3.3373	0.135627			3.3373	0.133219			3.3373	0.17469			3.3373	0.082443
	3.34395	0.156127			3.34395	0.159894			3.34395	0.091035			3.34395	0.096865			3.34395	0.090108			3.34395	0.138861			3.34395	0.135977			3.34395	0.177593			3.34395	0.083523
	3.35059	0.158677			3.35059	0.162872			3.35059	0.091799			3.35059	0.099166			3.35059	0.091486			3.35059	0.141091			3.35059	0.13912			3.35059	0.179887			3.35059	0.084592
	3.35724	0.160782			3.35724	0.165819			3.35724	0.093015			3.35724	0.101063			3.35724	0.09241			3.35724	0.14324			3.35724	0.14168			3.35724	0.182792			3.35724	0.086259
	3.36388	0.163749			3.36388	0.168997			3.36388	0.094787			3.36388	0.100877			3.36388	0.093679			3.36388	0.145757			3.36388	0.143901			3.36388	0.186438			3.36388	0.087501
	3.37053	0.167085			3.37053	0.17215			3.37053	0.095834			3.37053	0.101881			3.37053	0.095784			3.37053	0.147846			3.37053	0.146678			3.37053	0.189876			3.37053	0.088338
	3.37717	0.169545			3.37717	0.174859			3.37717	0.096347			3.37717	0.102046			3.37717	0.09757			3.37717	0.14963			3.37717	0.148274			3.37717	0.192774			3.37717	0.089448
	3.38382	0.172414			3.38382	0.17756			3.38382	0.097338			3.38382	0.104281			3.38382	0.099363			3.38382	0.151729			3.38382	0.149571			3.38382	0.196468			3.38382	0.090489
	3.39047	0.175514			3.39047	0.180453			3.39047	0.09857			3.39047	0.107458			3.39047	0.101675			3.39047	0.154337			3.39047	0.151891			3.39047	0.199928			3.39047	0.090546
	3.39712	0.178452			3.39712	0.184031			3.39712	0.099616			3.39712	0.109113			3.39712	0.104708			3.39712	0.156619			3.39712	0.155186			3.39712	0.203448			3.39712	0.090983
	3.40376	0.181023			3.40376	0.187295			3.40376	0.100466			3.40376	0.10938			3.40376	0.106304			3.40376	0.159428			3.40376	0.158497			3.40376	0.20663			3.40376	0.09251
	3.41041	0.184229			3.41041	0.190406			3.41041	0.101446			3.41041	0.110448			3.41041	0.107469			3.41041	0.162443			3.41041	0.162052			3.41041	0.210056			3.41041	0.094529
	3.41706	0.187254			3.41706	0.193222			3.41706	0.102409			3.41706	0.110651			3.41706	0.107833			3.41706	0.164948			3.41706	0.165158			3.41706	0.213587			3.41706	0.095608
	3.42371	0.190053			3.42371	0.196746			3.42371	0.103677			3.42371	0.112043			3.42371	0.107884			3.42371	0.166269			3.42371	0.167403			3.42371	0.217174			3.42371	0.096952
	3.43036	0.193171			3.43036	0.199365			3.43036	0.105299			3.43036	0.11303			3.43036	0.108514			3.43036	0.167416			3.43036	0.168609			3.43036	0.221137			3.43036	0.098359
	3.43701	0.196665			3.43701	0.203079			3.43701	0.106187			3.43701	0.116037			3.43701	0.110151			3.43701	0.169375			3.43701	0.170532			3.43701	0.225395			3.43701	0.099124
	3.44366	0.199853			3.44366	0.206593			3.44366	0.106741			3.44366	0.117912			3.44366	0.110208			3.44366	0.171612			3.44366	0.173785			3.44366	0.22878			3.44366	0.09897
	3.45031	0.202336			3.45031	0.20968			3.45031	0.107784			3.45031	0.11813			3.45031	0.111091			3.45031	0.174277			3.45031	0.17694			3.45031	0.231976			3.45031	0.10004
	3.45696	0.205401			3.45696	0.212071			3.45696	0.109485			3.45696	0.119026			3.45696	0.113127			3.45696	0.177078			3.45696	0.179014			3.45696	0.236022			3.45696	0.101838
	3.46361	0.20933			3.46361	0.215477			3.46361	0.110403			3.46361	0.121109			3.46361	0.114031			3.46361	0.180229			3.46361	0.181805			3.46361	0.240161			3.46361	0.103173
	3.47026	0.212595			3.47026	0.219386			3.47026	0.11099			3.47026	0.125552			3.47026	0.115435			3.47026	0.182799			3.47026	0.185721			3.47026	0.243507			3.47026	0.104438
	3.47692	0.215331			3.47692	0.223178			3.47692	0.112243			3.47692	0.125609			3.47692	0.11556			3.47692	0.185027			3.47692	0.189214			3.47692	0.246901			3.47692	0.106421
	3.48357	0.218956			3.48357	0.226403			3.48357	0.114155			3.48357	0.127932			3.48357	0.114836			3.48357	0.187738			3.48357	0.191552			3.48357	0.251622			3.48357	0.108062
	3.49022	0.222912			3.49022	0.2303			3.49022	0.11506			3.49022	0.129723			3.49022	0.11558			3.49022	0.190434			3.49022	0.195357			3.49022	0.255887			3.49022	0.109019
	3.49687	0.22642			3.49687	0.234335			3.49687	0.115549			3.49687	0.132483			3.49687	0.11734			3.49687	0.193139			3.49687	0.199484			3.49687	0.259638			3.49687	0.109847
	3.50353	0.230116			3.50353	0.238128			3.50353	0.117772			3.50353	0.132778			3.50353	0.119771			3.50353	0.196462			3.50353	0.201817			3.50353	0.264092			3.50353	0.112067
	3.51018	0.234826			3.51018	0.242088			3.51018	0.120481			3.51018	0.135639			3.51018	0.124119			3.51018	0.200468			3.51018	0.204945			3.51018	0.26994			3.51018	0.113264
	3.51684	0.240305			3.51684	0.247235			3.51684	0.122216			3.51684	0.138633			3.51684	0.129148			3.51684	0.204395			3.51684	0.210145			3.51684	0.276186			3.51684	0.11449
	3.52349	0.245643			3.52349	0.253713			3.52349	0.123621			3.52349	0.141358			3.52349	0.130752			3.52349	0.208326			3.52349	0.215832			3.52349	0.2824			3.52349	0.116958
	3.53015	0.250913			3.53015	0.258841			3.53015	0.126312			3.53015	0.143268			3.53015	0.131858			3.53015	0.212542			3.53015	0.220552			3.53015	0.288582			3.53015	0.120577
	3.5368	0.256881			3.5368	0.263718			3.5368	0.128506			3.5368	0.142999			3.5368	0.132794			3.5368	0.217399			3.5368	0.224403			3.5368	0.294531			3.5368	0.122766
	3.54346	0.262387			3.54346	0.26925			3.54346	0.129301			3.54346	0.143751			3.54346	0.135847			3.54346	0.221379			3.54346	0.229143			3.54346	0.29905			3.54346	0.124153
	3.55011	0.266783			3.55011	0.274913			3.55011	0.130755			3.55011	0.144706			3.55011	0.138442			3.55011	0.225014			3.55011	0.233532			3.55011	0.303777			3.55011	0.126567
	3.55677	0.271555			3.55677	0.279983			3.55677	0.133984			3.55677	0.147032			3.55677	0.140452			3.55677	0.229561			3.55677	0.23684			3.55677	0.310179			3.55677	0.129538
	3.56343	0.277628			3.56343	0.285109			3.56343	0.136287			3.56343	0.150266			3.56343	0.139958			3.56343	0.234661			3.56343	0.240641			3.56343	0.316494			3.56343	0.130557
	3.57008	0.282861			3.57008	0.291732			3.57008	0.136724			3.57008	0.152798			3.57008	0.140573			3.57008	0.239091			3.57008	0.245959			3.57008	0.321372			3.57008	0.130665
	3.57674	0.286333			3.57674	0.298025			3.57674	0.137302			3.57674	0.157105			3.57674	0.142701			3.57674	0.242076			3.57674	0.250247			3.57674	0.32507			3.57674	0.132447
	3.5834	0.289638			3.5834	0.302154			3.5834	0.140069			3.5834	0.158363			3.5834	0.146129			3.5834	0.244888			3.5834	0.253387			3.5834	0.329519			3.5834	0.135068
	3.59006	0.294619			3.59006	0.306681			3.59006	0.142316			3.59006	0.160256			3.59006	0.148017			3.59006	0.248783			3.59006	0.25648			3.59006	0.335096			3.59006	0.136517
	3.59672	0.300056			3.59672	0.312725			3.59672	0.142488			3.59672	0.162653			3.59672	0.150308			3.59672	0.252548			3.59672	0.261398			3.59672	0.340127			3.59672	0.13639
	3.60338	0.304014			3.60338	0.318533			3.60338	0.143			3.60338	0.164449			3.60338	0.152294			3.60338	0.256038			3.60338	0.265719			3.60338	0.344168			3.60338	0.138047
	3.61004	0.30756			3.61004	0.322604			3.61004	0.145167			3.61004	0.163974			3.61004	0.152915			3.61004	0.258622			3.61004	0.268416			3.61004	0.348838			3.61004	0.14038
	3.6167	0.312475			3.6167	0.327517			3.6167	0.146467			3.6167	0.167236			3.6167	0.154479			3.6167	0.261675			3.6167	0.271963			3.6167	0.354517			3.6167	0.141203
	3.62336	0.317745			3.62336	0.334264			3.62336	0.144918			3.62336	0.171119			3.62336	0.155388			3.62336	0.2641			3.62336	0.2771			3.62336	0.359604			3.62336	0.141523
	3.63002	0.322248			3.63002	0.341457			3.63002	0.144649			3.63002	0.173444			3.63002	0.157687			3.63002	0.266804			3.63002	0.281463			3.63002	0.364208			3.63002	0.143441
	3.63668	0.326487			3.63668	0.346745			3.63668	0.147485			3.63668	0.176405			3.63668	0.16019			3.63668	0.271555			3.63668	0.284741			3.63668	0.369886			3.63668	0.146383
	3.64334	0.332299			3.64334	0.352137			3.64334	0.14994			3.64334	0.178107			3.64334	0.163768			3.64334	0.277217			3.64334	0.288792			3.64334	0.376416			3.64334	0.147502
	3.65	0.338472			3.65	0.35876			3.65	0.149519			3.65	0.177571			3.65	0.163867			3.65	0.281496			3.65	0.29409			3.65	0.382072			3.65	0.147044
	3.65667	0.34297			3.65667	0.365204			3.65667	0.149004			3.65667	0.177727			3.65667	0.164546			3.65667	0.282998			3.65667	0.299165			3.65667	0.385337			3.65667	0.148119
	3.66333	0.346627			3.66333	0.370399			3.66333	0.150158			3.66333	0.177965			3.66333	0.164105			3.66333	0.285259			3.66333	0.301371			3.66333	0.38902			3.66333	0.151112
	3.66999	0.352145			3.66999	0.374716			3.66999	0.151004			3.66999	0.177823			3.66999	0.164247			3.66999	0.289189			3.66999	0.303892			3.66999	0.395156			3.66999	0.152248
	3.67665	0.358936			3.67665	0.381095			3.67665	0.150514			3.67665	0.177097			3.67665	0.16716			3.67665	0.292361			3.67665	0.30898			3.67665	0.400797			3.67665	0.151568
	3.68332	0.364713			3.68332	0.388581			3.68332	0.151116			3.68332	0.177173			3.68332	0.168208			3.68332	0.294604			3.68332	0.315094			3.68332	0.406853			3.68332	0.151509
	3.68998	0.369212			3.68998	0.394504			3.68998	0.154082			3.68998	0.18427			3.68998	0.167924			3.68998	0.296819			3.68998	0.319316			3.68998	0.412532			3.68998	0.154331
	3.69665	0.374707			3.69665	0.399464			3.69665	0.156725			3.69665	0.192139			3.69665	0.167177			3.69665	0.300922			3.69665	0.322053			3.69665	0.419246			3.69665	0.156281
	3.70331	0.381656			3.70331	0.406588			3.70331	0.156185			3.70331	0.19743			3.70331	0.169146			3.70331	0.30471			3.70331	0.326133			3.70331	0.426073			3.70331	0.154995
	3.70998	0.386888			3.70998	0.415555			3.70998	0.154247			3.70998	0.199599			3.70998	0.174296			3.70998	0.307724			3.70998	0.331788			3.70998	0.429997			3.70998	0.153999
	3.71664	0.389975			3.71664	0.421858			3.71664	0.154965			3.71664	0.19963			3.71664	0.176486			3.71664	0.311057			3.71664	0.334931			3.71664	0.433219			3.71664	0.156278
	3.72331	0.394284			3.72331	0.425667			3.72331	0.156778			3.72331	0.198806			3.72331	0.177776			3.72331	0.314392			3.72331	0.336727			3.72331	0.437738			3.72331	0.157795
	3.72998	0.40159			3.72998	0.432832			3.72998	0.15785			3.72998	0.196487			3.72998	0.180793			3.72998	0.318558			3.72998	0.341547			3.72998	0.446233			3.72998	0.156529
	3.73664	0.410185			3.73664	0.443256			3.73664	0.156875			3.73664	0.194559			3.73664	0.182839			3.73664	0.32134			3.73664	0.349521			3.73664	0.454185			3.73664	0.156058
	3.74331	0.41569			3.74331	0.452486			3.74331	0.156831			3.74331	0.193773			3.74331	0.182623			3.74331	0.323081			3.74331	0.354118			3.74331	0.459676			3.74331	0.158292
	3.74998	0.41901			3.74998	0.456826			3.74998	0.158348			3.74998	0.193951			3.74998	0.180857			3.74998	0.324997			3.74998	0.354323			3.74998	0.464503			3.74998	0.161224
	3.75665	0.424578			3.75665	0.46194			3.75665	0.158824			3.75665	0.195571			3.75665	0.181124			3.75665	0.328096			3.75665	0.355437			3.75665	0.471255			3.75665	0.161589
	3.76331	0.431386			3.76331	0.470255			3.76331	0.157414			3.76331	0.197023			3.76331	0.180516			3.76331	0.329537			3.76331	0.360773			3.76331	0.476723			3.76331	0.159434
	3.76998	0.437096			3.76998	0.48103			3.76998	0.156858			3.76998	0.201262			3.76998	0.180784			3.76998	0.330773			3.76998	0.3669			3.76998	0.480398			3.76998	0.158823
	3.77665	0.440851			3.77665	0.486403			3.77665	0.158691			3.77665	0.201943			3.77665	0.180408			3.77665	0.334094			3.77665	0.369571			3.77665	0.483636			3.77665	0.162101
	3.78332	0.446503			3.78332	0.490715			3.78332	0.160237			3.78332	0.202835			3.78332	0.180887			3.78332	0.339578			3.78332	0.371473			3.78332	0.489754			3.78332	0.163075
	3.78999	0.455125			3.78999	0.498744			3.78999	0.158654			3.78999	0.206157			3.78999	0.184259			3.78999	0.344644			3.78999	0.376476			3.78999	0.498746			3.78999	0.161425
	3.79666	0.463029			3.79666	0.510017			3.79666	0.157018			3.79666	0.207469			3.79666	0.187632			3.79666	0.34808			3.79666	0.383806			3.79666	0.505719			3.79666	0.160863
	3.80333	0.469471			3.80333	0.518675			3.80333	0.157439			3.80333	0.209856			3.80333	0.188186			3.80333	0.349971			3.80333	0.388208			3.80333	0.511709			3.80333	0.162837
	3.81	0.474565			3.81	0.522811			3.81	0.158805			3.81	0.212473			3.81	0.187971			3.81	0.352222			3.81	0.389478			3.81	0.517583			3.81	0.164069
	3.81667	0.482465			3.81667	0.530404			3.81667	0.158772			3.81667	0.212944			3.81667	0.187824			3.81667	0.356072			3.81667	0.393148			3.81667	0.524865			3.81667	0.162467
	3.82335	0.491329			3.82335	0.541677			3.82335	0.157124			3.82335	0.211334			3.82335	0.186509			3.82335	0.35974			3.82335	0.399381			3.82335	0.532462			3.82335	0.160746
	3.83002	0.498402			3.83002	0.553688			3.83002	0.155727			3.83002	0.209578			3.83002	0.187326			3.83002	0.363667			3.83002	0.405274			3.83002	0.538955			3.83002	0.16142
	3.83669	0.504811			3.83669	0.561276			3.83669	0.156904			3.83669	0.209127			3.83669	0.188161			3.83669	0.365556			3.83669	0.4092			3.83669	0.546431			3.83669	0.165112
	3.84336	0.513468			3.84336	0.566148			3.84336	0.159496			3.84336	0.20905			3.84336	0.189921			3.84336	0.368247			3.84336	0.413013			3.84336	0.556074			3.84336	0.165469
	3.85004	0.523836			3.85004	0.571308			3.85004	0.157057			3.85004	0.217412			3.85004	0.188252			3.85004	0.371396			3.85004	0.419894			3.85004	0.566391			3.85004	0.162661
	3.85671	0.533077			3.85671	0.579168			3.85671	0.153386			3.85671	0.229987			3.85671	0.191537			3.85671	0.373316			3.85671	0.426502			3.85671	0.5725			3.85671	0.160445
	3.86339	0.540036			3.86339	0.58372			3.86339	0.152421			3.86339	0.233682			3.86339	0.197421			3.86339	0.374243			3.86339	0.429384			3.86339	0.579921			3.86339	0.161164
	3.87006	0.548695			3.87006	0.582298			3.87006	0.155193			3.87006	0.230369			3.87006	0.204484			3.87006	0.376872			3.87006	0.432395			3.87006	0.590381			3.87006	0.163262
	3.87673	0.56022			3.87673	0.58024			3.87673	0.155344			3.87673	0.226004			3.87673	0.205064			3.87673	0.381811			3.87673	0.437341			3.87673	0.605852			3.87673	0.163331
	3.88341	0.574935			3.88341	0.582795			3.88341	0.152997			3.88341	0.223708			3.88341	0.202526			3.88341	0.384599			3.88341	0.44915			3.88341	0.621016			3.88341	0.162512
	3.89008	0.587763			3.89008	0.587807			3.89008	0.151117			3.89008	0.22494			3.89008	0.192401			3.89008	0.388059			3.89008	0.45918			3.89008	0.629859			3.89008	0.162147
	3.89676	0.598439			3.89676	0.591534			3.89676	0.153284			3.89676	0.228342			3.89676	0.189134			3.89676	0.393395			3.89676	0.464051			3.89676	0.638242			3.89676	0.165423
